# Supplementary material for: Snake venom gene expression is coordinated by novel regulatory architecture and the integration of multiple co-opted vertebrate pathways
Source: HighWire-hosted journal article supplement (doi:10.1101/gr.276251.121), 2022-06-01
Supplement: Supplemental_Code.zip [file CandTFInfo_forSupp_08.31.21.xlsx]

## Sheet: CandTFInfo_forSupp_08.31.21
		Candidate Approach		Normalized Counts (TPM)									Transcription Factor Type			Relevant Functional Characteristics					Differential Expression Analysis Results
Transcription Factor Symbol	Transcript ID	SE-Associated (ChIP-seq)	Upregulated in Venom Gland (RNA-seq)	Venom Gland (RVG_1)	Venom Gland (RVG_11)	Venom Gland (RVG_4)	Liver (Lvr_11)	Liver (Lvr_4)	Pancreas (Panc_1)	Pancreas (Pnc_11)	Pancrease (Pnc_4)	Stomach (Stom_1)	DNA Binding	Protein Binding	Coregulator	Previously implicated in venom regulation	Interacts with ERK	Adrenoceptor Signaling Pathway	Unfolded Protein Response Pathway	AP-1 Complex Member	Non-Venom vs. Venom - Log2FoldChange	Non-Venom vs. Venom - p-value	Non-Venom vs. Venom - IHW p-value
SIRT1	crovir-transcript-10232	-	✓	8.11922	8.93243	8.8455	7.78899	7.52383	8.00674	7.99745	7.50378	7.21671	✓	-	✓	-	-	-	-	-	1.01075	0.00223493	0.00835664
RERE	crovir-transcript-1029	✓	-	5.94041	5.74575	6.01775	5.54196	5.29044	6.73232	6.3979	5.79805	7.14757	✓	-	✓	-	-	-	-	-	-0.308761	0.536037	0.637278
NOC2L	crovir-transcript-1030	-	✓	7.03289	8.3875	7.99658	5.48079	6.5753	6.8497	6.3979	6.40205	7.0126	-	-	✓	-	-	-	-	-	1.62224	0.00220537	0.0081719
IKZF5	crovir-transcript-10426	✓	✓	8.24816	7.98004	8.12935	6.09894	6.62767	6.27422	6.1877	6.48156	6.68823	✓	-	-	-	-	-	-	-	1.92548	1.2345e-11	4.83616e-10
SUFU	crovir-transcript-10545	✓	-	4.8867	4.39045	4.38179	3.93346	3.58259	3.77581	3.89217	3.12832	4.61169	-	-	✓	-	-	-	-	-	1.79192	0.0554029	0.0956327
PPRC1	crovir-transcript-10564	-	✓	9.71134	9.55545	9.62502	6.26774	7.71036	5.53247	6.48212	6.45555	6.55806	-	-	✓	-	-	-	-	-	3.26879	1.09179e-09	2.41046e-08
HES6	crovir-transcript-10728	✓	✓	6.6315	4.93271	7.71187	3.12832	4.21946	3.12832	4.19665	3.12832	3.98205	✓	-	✓	-	-	-	-	-	5.37074	1.05932e-05	8.03545e-05
PIAS2	crovir-transcript-10952	-	✓	6.25424	6.07819	5.61329	4.68322	5.10867	5.47329	4.83875	4.45303	5.89993	-	-	✓	-	-	-	-	-	1.35278	0.00451807	0.0147788
BMPR1A	crovir-transcript-10972	-	✓	5.73653	6.26257	5.9525	5.12345	4.89634	4.6554	5.03185	4.86241	5.22949	✓	-	-	-	-	-	-	-	1.49456	0.000358386	0.00178271
TP73	crovir-transcript-1100	-	✓	6.0447	6.17341	5.75534	3.12832	3.12832	3.12832	4.19665	3.12832	3.12832	✓	-	-	-	-	-	-	-	6.18375	3.78125e-05	0.000226426
RORA	crovir-transcript-11061	-	✓	4.69034	5.53302	4.54524	3.12832	4.02606	4.03664	3.12832	3.98331	4.69393	✓	-	-	-	-	-	-	-	2.74402	0.0187619	0.047565
KLF13	crovir-transcript-11070	✓	-	5.53374	7.87626	6.01775	6.55457	4.74857	4.6554	4.51956	5.16642	6.78275	✓	-	-	-	-	-	-	-	1.43545	0.148851	0.241372
TSC22D4	crovir-transcript-11156	✓	-	5.99353	6.77456	7.0227	6.07886	8.06653	6.6044	6.41943	5.83945	6.43612	✓	-	-	-	-	-	-	-	-0.210919	0.742643	0.81163
ZNF592	crovir-transcript-11170	✓	-	7.73116	7.51578	8.21038	6.2137	6.42043	7.7783	5.78104	7.19586	8.36623	✓	-	-	-	-	-	-	-	1.03954	0.067841	0.131587
CAMTA1	crovir-transcript-1130	-	✓	6.2757	5.96077	6.27865	4.62246	3.90884	4.86782	3.89217	3.73725	5.58652	✓	-	-	-	-	-	-	-	2.93574	0.000103308	0.00062654
PRDM2	crovir-transcript-11363	✓	-	5.25032	5.17447	4.73087	4.68322	4.89634	4.23213	4.42297	3.73725	4.84269	✓	-	-	-	-	-	-	-	0.955946	0.166182	0.265678
AEBP2	crovir-transcript-11366	✓	-	8.50754	8.79598	9.11606	8.10469	8.55337	8.29723	7.90218	8.73741	7.94277	✓	-	✓	-	-	-	-	-	0.556076	0.0696548	0.135008
TLE1	crovir-transcript-11392	✓	-	6.31766	6.46883	6.60749	5.76223	6.32821	5.53247	5.47991	6.40205	6.99121	-	-	✓	-	-	-	-	-	0.371786	0.48539	0.593017
ZNF710	crovir-transcript-11397	✓	-	7.00768	6.71308	7.09895	6.09894	5.9884	6.65696	5.60081	6.25869	6.92505	✓	-	-	-	-	-	-	-	0.840225	0.0203083	0.0507035
FOXC2	crovir-transcript-11432	-	✓	8.20461	6.75726	7.79194	3.12832	3.12832	3.12832	3.12832	3.73725	3.12832	✓	-	-	✓	-	-	-	-	9.34095	5.22931e-18	4.63622e-16
CTCF	crovir-transcript-11549	-	✓	8.17106	8.22497	8.21721	6.52543	6.507	7.44846	6.69083	6.84357	7.15399	✓	-	✓	✓	-	-	-	-	1.50015	1.88119e-07	2.61408e-06
ZBED4	crovir-transcript-11707	-	✓	8.00959	9.51127	8.68721	6.52543	5.61912	5.97361	6.44064	6.19699	6.11575	✓	-	-	-	-	-	-	-	2.93829	4.49451e-12	1.72573e-10
ZNF800	crovir-transcript-11733	-	✓	6.43654	7.01161	7.2335	5.16394	6.17746	6.46379	5.9403	5.29484	6.25519	✓	-	-	-	-	-	-	-	1.27257	0.0135546	0.035795
SREBF2	crovir-transcript-12065	-	✓	10.2093	11.3126	9.68167	5.86034	6.42043	7.24141	6.9484	6.6049	8.17159	✓	-	-	✓	-	-	-	-	3.93561	4.32708e-11	1.60371e-09
ATF4	crovir-transcript-12088	✓	-	12.4045	12.2032	11.8122	11.8497	11.7525	11.9068	11.9464	11.9783	11.3623	✓	✓	-	-	✓	✓	✓	-	0.349892	0.184196	0.286882
SOX10	crovir-transcript-12111	-	✓	7.19794	7.08263	6.89156	4.48993	3.76815	4.86782	4.31637	4.45303	4.4756	✓	-	✓	-	-	-	-	-	4.00578	4.1487e-15	2.31509e-13
TDG	crovir-transcript-12187	-	✓	7.08202	7.99846	7.92738	6.73068	6.54837	6.2049	6.13639	5.75536	5.85242	-	-	✓	-	-	-	-	-	1.66335	7.96853e-06	6.95687e-05
CREB3L2	crovir-transcript-12236	✓	✓	10.6504	11.1742	11.5583	5.41667	6.71492	8.21258	7.51306	7.16428	7.67057	✓	-	-	✓	✓	✓	✓	-	4.16408	2.09251e-11	6.64505e-10
CREB3	crovir-transcript-12236	✓	✓	10.6504	11.1742	11.5583	5.41667	6.71492	8.21258	7.51306	7.16428	7.67057	✓	-	-	-	✓	✓	✓	-	4.16408	2.09251e-11	6.64505e-10
OVOL1	crovir-transcript-12399	✓	-	5.53374	5.05939	4.68724	3.12832	3.12832	4.39329	4.0586	5.02366	4.19927	✓	-	-	-	-	-	-	-	1.82104	0.146429	0.20605
FOSB	crovir-transcript-1248	✓	✓	8.3466	9.67925	8.20351	7.93912	7.26897	3.12832	5.19903	6.34644	3.67294	✓	-	-	-	-	-	-	-	4.60417	5.41616e-05	0.000425025
GATAD2B	crovir-transcript-12558	-	✓	6.51058	6.62991	6.8568	4.74092	5.38844	4.86782	4.76686	4.94568	5.86844	✓	-	-	-	-	-	-	-	2.09339	6.80026e-05	0.000439468
PPP1R13L	crovir-transcript-1260	✓	✓	10.4635	10.6418	10.5027	5.71042	5.81613	8.05617	7.67268	7.82928	7.01966	-	-	✓	-	-	-	-	-	3.44681	2.41049e-07	3.90968e-06
RORC	crovir-transcript-12617	-	✓	6.49243	5.51191	6.81212	3.93346	3.58259	3.12832	5.03185	3.12832	3.67294	✓	-	-	-	-	-	-	-	4.57414	0.00018515	0.000875189
ARNT	crovir-transcript-12636	✓	-	7.78394	7.96887	7.84589	9.1209	9.65753	8.48214	7.78381	7.98163	8.03246	✓	-	✓	-	-	-	-	-	-0.828987	0.105934	0.175411
AEBP1	crovir-transcript-12782	-	✓	7.34592	6.27485	6.90862	5.54196	5.35658	5.47329	6.02774	5.3546	6.86355	✓	-	✓	-	-	-	-	-	1.27427	0.011413	0.0310781
ARHGAP35	crovir-transcript-1287	-	✓	7.48005	7.57596	7.45246	6.44983	5.72118	7.01946	5.8144	5.7113	7.37349	✓	-	✓	-	-	-	-	-	1.38646	0.00197995	0.00762633
PURA	crovir-transcript-12918	✓	✓	6.56367	6.40337	5.56981	4.84842	4.57927	5.20594	4.69027	3.12832	6.06139	✓	-	-	-	-	-	-	-	2.05383	0.00647779	0.0180758
PURB	crovir-transcript-12918	✓	✓	6.56367	6.40337	5.56981	4.84842	4.57927	5.20594	4.69027	3.12832	6.06139	✓	-	-	-	-	-	-	-	2.05383	0.00647779	0.0180758
KAT6A	crovir-transcript-12928	✓	✓	9.31068	9.82144	9.89155	7.21267	7.06666	8.44552	7.62755	7.72516	8.72783	-	-	✓	-	-	-	-	-	2.03599	2.59441e-06	2.59053e-05
BARX2	crovir-transcript-12963	-	✓	7.43357	7.6983	7.51491	3.12832	4.12817	3.12832	3.12832	3.12832	4.13285	✓	-	-	-	-	-	-	-	6.74352	1.89023e-10	5.37174e-09
MXD1	crovir-transcript-12992	✓	✓	6.72754	8.7619	8.3287	3.12832	5.25608	5.84173	5.63882	5.29484	7.03367	✓	-	✓	-	-	-	-	-	3.31255	0.00186668	0.00723909
FIGLA	crovir-transcript-12994	✓	-	4.94559	3.68044	5.63451	3.12832	3.12832	5.3464	4.9708	3.12832	4.56818	✓	-	-	-	-	-	-	-	1.49941	0.383201	0.507622
BOLA3	crovir-transcript-13007	-	✓	7.82769	7.88024	7.14282	6.67878	6.66572	6.63092	6.82543	6.6049	5.81982	✓	-	-	-	-	-	-	-	1.26414	0.00116738	0.00492569
ATF6B	crovir-transcript-13131	-	✓	7.31547	6.81691	7.2062	4.62246	4.94182	5.3464	4.31637	4.86241	5.64402	✓	-	-	-	✓	✓	✓	-	2.9374	6.51341e-11	1.88173e-09
WNT5A	crovir-transcript-13528	-	✓	7.06989	7.28875	7.2062	3.12832	3.12832	4.03664	3.67156	3.12832	8.01144	✓	-	-	-	-	-	-	-	7.26299	9.40542e-06	7.98444e-05
CREBRF	crovir-transcript-13972	✓	-	5.88517	6.3464	5.67599	4.68322	4.89634	5.8871	6.11001	5.7113	5.96084	✓	-	-	-	-	-	-	-	0.543294	0.366895	0.445948
FOXI1	crovir-transcript-14004	-	✓	6.98201	6.67671	6.95042	3.12832	3.12832	3.12832	3.12832	3.12832	3.7934	✓	-	-	-	-	-	-	-	7.87461	2.98859e-14	1.30125e-12
ZNF750	crovir-transcript-14133	-	✓	9.4708	7.72511	9.03912	3.12832	3.12832	3.12832	3.12832	4.32098	3.12832	✓	-	-	-	-	-	-	-	9.29345	3.89286e-10	9.37755e-09
SOX9	crovir-transcript-14372	✓	-	9.5359	10.0635	10.1027	6.2137	5.67111	9.06332	9.7256	8.66054	8.77844	✓	-	-	-	-	-	-	-	1.3784	0.118638	0.204809
BUD31	crovir-transcript-144	✓	-	9.34616	8.80437	8.23078	8.30513	8.50557	9.10146	8.8733	9.19606	7.97571	✓	-	✓	-	-	-	-	-	0.115291	0.789773	0.846186
NR4A1	crovir-transcript-14451	✓	-	12.3646	14.0368	12.4879	13.1876	10.5063	7.60299	10.065	8.01732	7.0613	✓	-	-	-	✓	-	-	-	3.19339	NA	NA
DDIT3	crovir-transcript-14617	✓	-	8.95122	9.45108	10.3511	10.0996	8.56675	7.89161	8.20201	9.4682	6.73197	✓	-	✓	✓	-	-	✓	✓	1.03473	0.0727767	0.138806
ZNF740	crovir-transcript-14639	-	✓	5.88517	6.04975	6.35584	4.74092	5.32393	5.41136	5.14571	5.09705	5.68103	✓	-	-	-	-	-	-	-	1.24947	0.00487816	0.0143453
CSRNP2	crovir-transcript-14714	✓	-	7.27383	7.49515	7.12105	6.79301	8.08989	6.6044	7.07517	7.0129	6.93255	✓	-	-	-	-	-	-	-	0.176039	0.685779	0.826131
POU6F1	crovir-transcript-14715	-	✓	6.83196	6.65817	6.09524	4.99355	5.41955	5.53247	5.34696	5.23223	5.83622	✓	-	-	-	-	-	-	-	1.52708	3.29484e-05	0.00023881
MBD1	crovir-transcript-14772	✓	✓	9.66593	9.60553	10.0074	7.73314	7.52383	7.62938	7.31077	7.51633	8.15252	✓	-	-	-	-	-	-	-	2.21549	1.05892e-14	5.53815e-13
KDM5C	crovir-transcript-14830	-	✓	9.22069	9.37141	9.66927	8.29231	8.37862	8.20383	8.46036	7.75719	8.93536	✓	-	-	-	-	-	-	-	1.10726	0.00103112	0.00445482
HCFC1	crovir-transcript-14873	✓	-	9.67194	9.84401	10.0434	8.65792	9.64656	9.19704	9.11448	8.8943	9.57721	✓	-	✓	-	-	-	-	-	0.66087	0.0454856	0.11527
SMARCA2	crovir-transcript-14989	-	✓	5.56972	5.65316	5.35458	4.33843	3.90884	3.77581	4.51956	4.45303	4.19927	-	-	✓	-	-	-	-	-	2.5062	2.89233e-05	0.000180131
SMARCA4	crovir-transcript-14989	-	✓	5.56972	5.65316	5.35458	4.33843	3.90884	3.77581	4.51956	4.45303	4.19927	-	-	✓	-	-	-	-	-	2.5062	2.89233e-05	0.000180131
CARM1	crovir-transcript-14997	-	✓	7.00768	7.3647	6.83909	4.94706	5.47967	5.27806	4.69027	5.41176	6.32579	-	-	✓	-	-	-	-	-	2.18651	5.57418e-05	0.000399914
NFIX	crovir-transcript-15019	-	✓	4.36044	5.49046	4.81352	3.12832	3.12832	3.12832	3.12832	3.12832	4.19927	✓	-	-	✓	-	-	-	-	5.55059	0.00222677	0.00710966
ZBTB6	crovir-transcript-1506	✓	✓	5.67224	5.70947	6.42903	4.33843	5.14714	5.3464	3.89217	4.67608	5.17716	✓	-	-	-	-	-	-	-	1.86398	0.00728427	0.0217462
SP1	crovir-transcript-15064	✓	-	7.15269	8.12122	7.96849	6.1575	6.507	6.40338	6.44064	6.3178	8.58109	✓	-	-	-	✓	-	-	-	1.22215	0.0674087	0.152097
ZBTB26	crovir-transcript-1507	✓	-	6.18782	6.1602	6.77535	5.73657	5.74554	5.58916	5.74685	5.41176	5.62512	✓	-	-	-	-	-	-	-	0.981706	0.00447749	0.0146579
ZNF462	crovir-transcript-15288	✓	✓	8.91791	8.78965	8.13658	6.11873	6.35963	6.97887	7.22841	6.8634	6.97677	✓	-	-	-	-	-	-	-	2.01896	2.27779e-07	3.06759e-06
MLLT3	crovir-transcript-15356	-	✓	8.59445	7.41502	7.52598	5.08162	4.45005	4.39329	5.19903	4.32098	7.115	✓	-	-	-	-	-	-	-	3.22834	4.22827e-05	0.000292871
NFIB	crovir-transcript-15370	✓	-	6.18782	5.49046	4.73087	4.68322	4.21946	3.12832	3.12832	3.12832	4.31926	✓	-	✓	✓	-	-	-	-	2.9295	0.0246382	0.0590474
GTF2H2	crovir-transcript-15686	-	✓	7.25256	6.78313	6.39291	5.62881	6.62767	5.27806	4.90657	6.06478	5.12262	✓	-	-	-	-	-	-	-	1.49465	0.0176912	0.0447801
JMY	crovir-transcript-15731	-	✓	4.8867	5.53302	4.54524	3.12832	4.12817	4.03664	3.89217	3.73725	4.80723	-	-	✓	-	-	-	-	-	2.48131	0.0152184	0.0396938
CDK7	crovir-transcript-15748	-	✓	7.20903	6.56168	6.78463	5.57154	5.90495	5.12954	5.84697	6.22818	5.91541	-	-	✓	-	-	-	-	-	1.33097	0.00163115	0.00650104
SREBF1	crovir-transcript-1605	✓	✓	11.0359	11.6171	10.8489	9.62856	9.07937	8.48935	8.90386	9.16857	7.68392	✓	-	-	-	-	-	-	-	2.40584	5.60451e-10	1.64376e-08
MBNL3	crovir-transcript-16112	✓	✓	6.33818	7.60513	6.67902	4.48993	4.94182	5.27806	5.09006	5.16642	7.5198	✓	-	-	-	-	-	-	-	2.22206	0.00811653	0.0240338
FOXO4	crovir-transcript-16138	✓	-	7.88402	7.76441	8.11478	8.45062	8.82501	9.33149	8.32572	8.73205	9.74668	✓	✓	-	-	✓	-	-	-	-1.00818	0.00248856	0.00908797
FOXO3	crovir-transcript-16138	✓	-	7.88402	7.76441	8.11478	8.45062	8.82501	9.33149	8.32572	8.73205	9.74668	✓	✓	-	✓	✓	-	-	-	-1.00818	0.00248856	0.00908797
TSC22D3	crovir-transcript-16160	✓	-	7.46163	8.77478	8.47272	10.5095	10.371	9.6537	10.2518	9.86302	8.81527	✓	-	-	-	-	-	-	-	-1.76153	1.48164e-08	3.21231e-07
TERF2	crovir-transcript-16196	✓	-	8.84182	8.43963	8.93731	8.65792	8.56342	8.78727	9.45604	9.24952	7.6205	✓	-	-	-	-	-	-	-	-0.0208295	0.962085	0.932601
HIF3A	crovir-transcript-16294	✓	✓	5.60476	8.12122	6.21091	5.81216	5.06899	4.39329	4.42297	5.41176	5.52647	✓	-	✓	-	-	-	-	-	2.22678	0.00499262	0.0161941
LITAF	crovir-transcript-1631	✓	-	8.80949	7.92331	8.11844	5.16394	6.29608	13.1391	10.4729	11.1855	10.5011	✓	-	-	-	-	-	-	-	-2.43305	0.037238	0.0988224
XBP1	crovir-transcript-16464	✓	-	11.6096	11.4824	11.4157	9.80572	10.7996	10.8235	10.9167	11.1558	8.19041	✓	-	-	-	-	-	✓	-	1.01739	0.0920519	0.165262
TFAP4	crovir-transcript-1652	✓	-	7.18676	7.10326	6.99901	7.99294	7.83176	7.66808	8.47061	7.62453	6.84775	✓	-	-	-	-	-	-	-	-0.737918	0.0596457	0.117391
GLIS2	crovir-transcript-1669	✓	-	8.79856	8.11448	8.18271	8.08004	7.80377	8.81048	8.88483	8.44172	7.79885	✓	-	-	-	-	-	-	-	0.00542078	0.989408	0.949673
CSRNP1	crovir-transcript-1739	-	✓	5.73653	8.49515	7.0765	6.66551	4.98567	4.39329	4.90657	3.98331	5.25487	✓	-	-	-	-	-	-	-	2.47168	0.00766017	0.0228695
CREM	crovir-transcript-1813	✓	-	6.68033	7.3243	5.86636	9.02351	7.6737	5.69586	5.74685	5.23223	5.25487	✓	-	-	-	-	✓	-	-	-0.0365846	0.970447	0.979465
DNAJC1	crovir-transcript-1928	-	✓	8.68435	8.67072	8.67485	6.75594	6.54837	8.01676	8.31439	7.03054	6.54829	✓	-	-	-	-	-	-	-	1.3882	0.0160031	0.0487962
ZBTB33	crovir-transcript-209	-	✓	6.0447	6.65817	6.27865	5.2032	4.37897	5.41136	5.03185	4.86241	6.16808	✓	-	-	-	-	-	-	-	1.69443	0.00485341	0.0142939
NKRF	crovir-transcript-213	-	✓	7.09404	6.8499	7.41126	6.49567	5.793	6.57737	5.63882	5.87965	6.15518	✓	-	-	-	-	-	-	-	1.22779	0.00217657	0.00820522
SKI	crovir-transcript-2243	-	✓	8.25351	6.85803	6.58638	5.2783	5.88328	5.04826	5.47991	4.86241	6.50852	✓	-	✓	-	-	-	-	-	2.02511	0.000329722	0.00169442
RARA	crovir-transcript-2559	✓	-	5.33769	6.0922	5.38029	8.26196	6.89629	5.12954	5.19903	5.02366	5.52647	✓	-	✓	-	✓	-	-	-	-0.954815	0.28986	0.404885
NFE2L1	crovir-transcript-2627	-	✓	7.93157	8.70475	7.61676	6.93233	6.39036	6.49305	6.28502	6.06478	7.75735	✓	✓	✓	-	-	-	-	-	1.63297	0.00206523	0.0091171
SP6	crovir-transcript-2638	-	✓	6.33818	6.82523	6.30485	3.12832	3.12832	3.12832	3.12832	3.12832	3.89408	✓	-	-	-	-	-	-	-	7.44562	5.26553e-10	1.04279e-08
ZNF652	crovir-transcript-2640	-	✓	10.3767	10.4777	11.1247	8.4156	8.36337	8.45292	8.1327	8.21468	7.91285	✓	-	-	-	-	-	-	-	2.49754	7.18179e-19	9.5667e-17
DLX4	crovir-transcript-2658	-	✓	5.1071	6.28703	6.99102	3.12832	3.12832	3.12832	3.12832	3.12832	3.67294	✓	-	-	-	-	-	-	-	7.44708	9.00109e-09	1.65156e-07
BHLHA15	crovir-transcript-320	✓	✓	10.5311	11.8449	11.132	3.12832	3.12832	7.84735	7.57145	6.99505	7.93163	✓	-	-	-	-	-	✓	-	4.70259	0.0020109	0.00925011
CREG1	crovir-transcript-3779	-	✓	9.19868	8.27719	8.79616	7.35123	7.76945	7.88067	6.80928	7.30118	8.17159	-	-	✓	-	✓	-	-	-	1.27222	9.62889e-05	0.000591433
TAF13	crovir-transcript-3854	-	✓	9.0156	9.49581	8.85867	7.42367	7.46781	8.01676	7.43133	7.2866	7.84316	✓	-	✓	-	-	-	-	-	1.67379	1.18781e-08	2.14111e-07
BLZF1	crovir-transcript-3855	-	✓	8.72728	9.2675	9.67301	7.4315	7.41692	7.32462	7.64577	8.18361	6.50852	✓	-	-	-	✓	-	-	-	1.88779	8.83027e-08	1.32038e-06
MKL2	crovir-transcript-411	-	✓	5.29474	5.7811	4.85278	3.12832	4.12817	3.12832	3.67156	3.98331	5.27977	-	-	✓	-	-	-	-	-	2.86301	0.0235065	0.048667
PITX2	crovir-transcript-4420	✓	✓	9.43358	9.28409	8.98812	3.12832	3.12832	3.12832	3.12832	3.12832	3.12832	✓	✓	✓	-	-	-	-	-	11.4967	1.69577e-30	5.12665e-28
SMARCA5	crovir-transcript-4474	-	✓	6.68033	6.72202	6.49862	5.62881	6.5753	5.27806	5.71178	6.16509	5.22949	✓	-	-	-	-	-	-	-	1.10086	0.0171199	0.0433235
CLOCK	crovir-transcript-4727	-	✓	6.51058	6.76594	6.19696	5.2783	4.3025	4.03664	4.90657	3.12832	5.62512	✓	✓	-	-	-	-	-	-	2.4875	0.00902799	0.0262413
NFXL1	crovir-transcript-4728	✓	-	7.73882	6.92146	7.03828	7.48512	7.26074	7.71811	7.94694	7.49113	7.10176	✓	-	-	-	-	-	-	-	-0.306199	0.398501	0.522364
TAF2	crovir-transcript-4874	-	✓	7.57729	7.22747	8.34127	6.79301	6.54837	6.40338	6.1877	6.19699	6.44669	-	✓	-	-	-	-	-	-	1.52659	9.39859e-05	0.000571001
MED30	crovir-transcript-4885	✓	-	7.11779	6.73975	6.25194	5.68376	5.74554	5.64356	6.50242	6.34644	5.32819	-	-	✓	-	-	-	-	-	1.06859	0.0307826	0.0697078
TRPS1	crovir-transcript-4887	-	✓	6.43654	6.78313	5.65541	3.12832	3.12832	4.23213	3.12832	3.98331	4.31926	✓	-	-	-	-	-	-	-	5.55803	1.29196e-07	1.55649e-06
GRHL2	crovir-transcript-4926	✓	-	4.36044	4.33498	4.38179	3.12832	3.12832	4.6554	4.19665	5.09705	5.62512	✓	-	-	✓	-	-	-	-	-0.338145	0.802336	0.863853
MTDH	crovir-transcript-4948	-	✓	11.5281	11.778	11.7391	8.94658	9.97702	9.6601	9.30397	9.17253	9.32116	-	-	✓	-	-	-	-	-	2.27727	1.16266e-12	4.35195e-11
NCOA2	crovir-transcript-5046	-	✓	6.86044	7.58575	7.31878	5.44912	5.25608	5.47329	5.47991	4.67608	7.41684	✓	-	✓	✓	-	-	-	-	2.1044	0.00334217	0.0125025
PLAG1	crovir-transcript-5094	✓	-	3.12832	3.12832	3.12832	4.62246	3.12832	3.12832	4.19665	3.12832	3.7934	✓	-	-	-	-	-	-	-	-4.11476	0.169246	1
KCTD1	crovir-transcript-5151	-	✓	6.77323	6.87415	6.95042	4.15922	3.76815	3.12832	4.31637	3.12832	4.26117	-	-	✓	-	-	-	-	-	4.90776	1.91524e-11	6.10506e-10
NFATC1	crovir-transcript-5268	-	✓	6.9949	4.93271	5.88402	3.7885	3.90884	4.23213	4.60819	5.02366	4.65356	✓	-	-	-	-	-	-	-	2.60872	0.00168774	0.00663934
HIVEP1	crovir-transcript-5324	-	✓	8.72343	8.48995	8.17571	6.3863	6.86399	6.95814	6.59975	7.56543	7.69276	✓	-	-	-	-	-	-	-	1.518	0.000192637	0.00126384
TFAP2A	crovir-transcript-5334	✓	✓	8.49856	8.56846	8.29357	3.12832	3.12832	6.27422	5.03185	5.29484	3.51456	✓	-	✓	-	-	-	-	-	4.56888	0.00191457	0.00742299
RREB1	crovir-transcript-5349	✓	✓	6.68033	6.99698	7.48119	5.44912	5.59236	5.04826	5.14571	5.02366	7.3174	✓	-	-	-	-	-	-	-	1.83062	0.0116445	0.0322751
IRX2	crovir-transcript-5470	✓	✓	9.09522	8.30409	8.81205	3.12832	3.12832	3.12832	5.52143	3.12832	3.12832	✓	-	-	-	-	-	-	-	8.50447	0.00573169	0.018184
IRX1	crovir-transcript-5471	✓	✓	10.9154	9.14563	10.4908	3.12832	3.12832	3.12832	4.9708	5.09705	3.67294	✓	-	-	-	-	-	-	-	8.47991	4.51086e-09	8.82922e-08
HDAC1	crovir-transcript-5542	✓	✓	11.4241	8.93243	10.844	8.61054	8.88495	8.12264	8.3973	8.67736	7.99011	✓	-	✓	-	-	-	-	-	2.27574	3.82627e-05	0.000326775
HDAC3	crovir-transcript-5542	✓	✓	11.4241	8.93243	10.844	8.61054	8.88495	8.12264	8.3973	8.67736	7.99011	✓	-	✓	-	-	-	-	-	2.27574	3.82627e-05	0.000326775
ATF6	crovir-transcript-5645	-	✓	6.84627	7.9726	7.58007	4.41697	5.9884	5.47329	5.43705	5.79805	6.9023	✓	-	✓	✓	-	-	✓	-	2.15164	0.00279553	0.0098716
CDC73	crovir-transcript-5698	✓	✓	7.56872	6.9896	7.05369	5.2783	4.57927	7.80169	5.34696	5.83945	7.29434	-	✓	-	-	-	-	-	-	1.58979	0.00768267	0.02268
DR1	crovir-transcript-5765	-	✓	5.45875	6.25017	6.90011	5.03836	4.84908	4.53228	3.67156	4.77294	5.17716	✓	-	✓	-	-	-	-	-	2.27478	0.00240303	0.00800271
BCL10	crovir-transcript-5855	-	✓	5.63892	6.06405	5.9525	4.79589	5.02803	4.96134	4.69027	4.1682	4.80723	-	-	✓	-	-	-	-	-	1.76298	0.000212284	0.00116894
ZZZ3	crovir-transcript-5892	-	✓	7.6441	8.11785	8.19315	6.6521	7.11314	7.03933	6.96306	6.92132	7.32311	✓	-	-	-	-	-	-	-	1.09352	0.000283472	0.00160711
NFIA	crovir-transcript-5965	✓	✓	8.26945	8.40692	8.36915	5.48079	5.53719	5.20594	4.76686	4.94568	5.80322	✓	-	-	✓	-	-	-	-	3.62821	1.1276e-17	9.46017e-16
SPDEF	crovir-transcript-6220	✓	✓	9.3978	9.25683	8.89533	3.12832	4.12817	3.12832	3.12832	3.73725	8.99721	✓	-	-	✓	-	-	-	-	7.37524	2.06413e-05	0.000159645
PPARD	crovir-transcript-6233	-	✓	6.54619	6.92919	6.99901	4.5582	4.79989	4.86782	5.14571	5.41176	5.09444	✓	-	✓	-	-	-	-	-	2.51812	6.3666e-09	1.21407e-07
ELK4	crovir-transcript-6293	-	✓	5.94041	6.70407	6.42903	4.68322	5.29044	4.76642	4.83875	4.32098	5.76941	✓	-	✓	-	✓	-	-	-	1.99349	0.00146595	0.00536192
KDM5B	crovir-transcript-6418	✓	-	9.51155	9.38966	8.91016	8.51453	8.05708	8.47489	8.36471	8.60887	9.56285	✓	-	✓	-	-	-	-	-	0.671006	0.0580422	0.116104
ZNF341	crovir-transcript-6462	✓	-	6.56367	6.07819	6.44087	6.40245	6.10488	6.73232	6.28502	6.94011	6.19352	✓	-	-	-	-	-	-	-	-0.119416	0.749395	0.82435
NCOA3	crovir-transcript-6549	-	✓	8.86647	8.09407	9.11971	7.62815	6.92787	7.20673	7.71645	7.6129	7.29434	✓	-	✓	-	-	-	-	-	1.43118	0.000130424	0.000902205
ZNF217	crovir-transcript-6590	✓	✓	6.71198	6.62036	7.49815	3.12832	4.57927	5.27806	4.9708	4.86241	6.87138	✓	-	-	-	-	-	-	-	2.85165	0.00440517	0.0157936
UHRF1	crovir-transcript-6698	✓	-	5.33769	4.99767	5.45455	5.81216	4.45005	4.39329	4.19665	3.12832	5.35175	✓	-	-	-	-	-	-	-	0.693657	0.508199	0.624609
KLF11	crovir-transcript-6772	✓	✓	6.06959	7.41502	6.60749	4.62246	4.57927	4.39329	4.42297	3.98331	6.52855	✓	-	-	-	✓	-	-	-	3.06461	0.000693806	0.00285743
KLF16	crovir-transcript-6772	✓	✓	6.06959	7.41502	6.60749	4.62246	4.57927	4.39329	4.42297	3.98331	6.52855	✓	-	-	-	-	-	-	-	3.06461	0.000693806	0.00285743
GATAD2A	crovir-transcript-6778	-	✓	7.32569	7.56115	7.55328	5.08162	5.83888	6.49305	5.39277	5.61865	7.00551	✓	-	-	-	-	-	-	-	1.97557	7.69572e-05	0.000488024
JUN	crovir-transcript-6797	✓	-	8.64418	9.80794	9.58861	10.9234	8.87692	7.29192	7.73358	8.20697	6.90992	✓	✓	✓	✓	✓	-	-	✓	0.72701	0.335161	0.457012
ARID3A	crovir-transcript-6808	-	✓	4.94559	6.43648	5.52489	3.59716	3.76815	3.77581	3.67156	3.12832	6.27912	✓	-	-	-	-	-	-	-	4.41734	0.00104072	0.00443284
ZNF511	crovir-transcript-6877	✓	-	6.18782	5.976	6.58638	5.16394	5.50874	6.34028	6.37603	5.83945	5.83622	✓	-	-	-	-	-	-	-	0.504285	0.305678	0.386611
ERF	crovir-transcript-709	-	✓	7.75402	8.51319	8.60884	4.41697	6.35963	6.70764	6.50242	6.58107	6.67035	✓	-	✓	-	✓	-	-	-	2.24578	0.000818952	0.00394519
FOS	crovir-transcript-7192	✓	✓	9.91407	8.98138	9.42421	8.05497	9.16097	4.96134	5.56171	6.48156	4.42609	✓	✓	-	✓	✓	-	-	✓	3.38948	0.00143352	0.00581711
CIC	crovir-transcript-724	✓	✓	6.66424	7.04044	6.5757	4.15922	5.35658	5.04826	3.12832	5.09705	5.96084	✓	-	-	-	-	-	-	-	2.51234	0.00687206	0.0210789
ZNF410	crovir-transcript-7283	-	✓	9.45695	9.69626	9.43304	7.8191	7.96912	7.03933	7.31077	7.58936	6.55806	✓	-	-	-	-	-	-	-	2.27217	1.32883e-11	4.25399e-10
ZFP36L1	crovir-transcript-7440	✓	-	9.66994	9.51127	9.21151	12.4427	11.7565	8.95811	9.02	9.06163	9.95715	✓	-	-	-	-	-	-	-	-1.16891	0.167206	0.322284
CREB3L1	crovir-transcript-7444	-	✓	8.58174	9.34433	8.57733	5.08162	5.793	7.96593	7.22841	7.11558	8.15571	✓	-	-	-	✓	✓	✓	-	2.09724	0.0031071	0.0107594
NR1H3	crovir-transcript-7523	-	✓	9.00295	8.58317	9.14322	7.4158	7.35648	6.09404	6.54216	6.37452	5.69917	✓	-	✓	-	-	-	-	-	2.56461	1.54163e-07	2.58539e-06
CCND1	crovir-transcript-7537	-	✓	5.94041	6.28703	7.26028	4.41697	4.79989	4.03664	4.19665	4.94568	6.83979	-	-	✓	-	-	-	✓	-	2.44485	0.012327	0.0336581
EHF	crovir-transcript-7549	✓	✓	10.2065	9.72196	10.6545	3.12832	3.12832	6.09404	6.52243	6.3178	5.30421	✓	-	-	✓	-	-	-	-	5.07089	0.00024929	0.00133649
ELF5	crovir-transcript-7566	-	✓	10.583	9.9631	10.6695	4.05416	4.02606	7.5348	7.24047	6.74001	4.06091	✓	-	-	✓	-	-	-	-	4.37709	0.000261067	0.00130651
SSRP1	crovir-transcript-7902	-	✓	9.89879	10.0406	9.61342	8.78529	9.14769	8.40032	8.04625	8.5431	8.3607	✓	-	-	-	-	-	-	-	1.31972	7.35828e-05	0.000462496
KDM2A	crovir-transcript-7930	-	✓	7.94487	9.05884	8.08145	6.79301	6.90689	7.29192	7.60909	6.99505	8.0736	✓	-	-	-	-	-	-	-	1.24069	0.00965607	0.0272607
TFCP2L1	crovir-transcript-8096	✓	✓	9.47538	8.79598	9.30584	4.68322	6.37507	3.12832	4.31637	5.51919	7.30014	✓	-	✓	-	-	-	-	-	3.91272	0.000524197	0.00294356
NR4A2	crovir-transcript-8197	✓	-	10.8078	12.2192	11.1143	9.58547	4.69488	4.76642	5.9992	3.12832	4.42609	✓	-	-	✓	-	-	-	-	5.42492	NA	NA
ATF2	crovir-transcript-8315	-	✓	9.27167	8.88376	9.16458	7.61447	8.24772	8.47489	7.95426	7.84923	8.39084	✓	-	✓	-	✓	✓	-	-	1.06019	2.33848e-05	0.000176146
IKZF2	crovir-transcript-8481	-	✓	6.14172	6.28703	5.67599	3.12832	3.58259	3.12832	3.12832	3.12832	4.73293	✓	-	-	-	-	-	-	-	6.01	3.39262e-05	0.00020646
MEIS1	crovir-transcript-8589	✓	-	6.86044	6.8901	6.40505	4.48993	3.76815	7.79004	7.07517	6.48156	5.50584	✓	-	-	-	-	-	-	-	0.459267	0.667147	0.810959
GRHL1	crovir-transcript-8758	✓	✓	10.5562	11.0844	11.0908	4.25309	3.58259	4.76642	4.69027	4.94568	3.98205	✓	-	-	✓	-	-	-	-	7.94738	1.46962e-30	5.50006e-28
ZNF451	crovir-transcript-8917	-	✓	7.51617	8.8618	7.01485	6.59719	6.12338	6.2049	6.30833	6.19699	6.42546	✓	-	✓	-	-	-	-	-	1.90863	0.000125791	0.000733582
TBX3	crovir-transcript-9066	✓	✓	7.15269	8.02026	7.50376	7.10899	7.55104	4.03664	4.19665	6.06478	3.12832	✓	-	-	-	✓	-	-	-	3.12223	0.0103886	0.0341836
GRHL3	crovir-transcript-996	-	✓	4.14408	5.70947	6.46425	3.12832	3.58259	3.12832	3.12832	3.12832	3.89408	✓	-	-	-	-	-	-	-	6.01606	4.14657e-05	0.000284346
SUPT4H1	crovir-transcript-9971	-	✓	7.90459	8.12793	7.76885	7.19437	6.94854	6.8497	6.59975	6.74001	6.86355	✓	-	-	-	-	-	-	-	1.17738	1.35357e-05	0.000112075
