# Supplementary material for: Snake venom gene expression is coordinated by novel regulatory architecture and the integration of multiple co-opted vertebrate pathways
Source: HighWire-hosted journal article supplement (doi:10.1101/gr.276251.121), 2022-06-01
Supplement: Supplemental_Code.zip [file fullVenomAnnotation_02.20.20.xlsx]

## Sheet: Sheet1
scaffold-ma1	103004868	103021927	3-Finger toxin	maker-scaffold-ma1-augustus-gene-343.10	crovir-transcript-8022
scaffold-ma1	102999393	103000958	3-Finger toxin	maker-scaffold-ma1-augustus-gene-343.9	crovir-transcript-8023
scaffold-ma5	46133017	46179118	5' Nucleotidase	augustus_masked-scaffold-ma5-processed-gene-154.0	crovir-transcript-10531
scaffold-ma6	55711914	55732365	5' Nucleotidase	maker-scaffold-ma6-augustus-gene-185.9	crovir-transcript-12186
scaffold-mi1	18004217	18021456	5' Nucleotidase	maker-scaffold-mi1-augustus-gene-60.18	crovir-transcript-12960
scaffold-ma2	45090212	45121335	5' Nucleotidase	maker-scaffold-ma2-augustus-gene-150.14	crovir-transcript-13616
scaffold-ma2	134237148	134264183	5' Nucleotidase	maker-scaffold-ma2-augustus-gene-447.12	crovir-transcript-14860
scaffold-ma2	4047955	4053281	Acetylcholinesterase	maker-scaffold-ma2-augustus-gene-13.12	crovir-transcript-13187
scaffold-ma2	3948506	3952373	Acetylcholinesterase	maker-scaffold-ma2-augustus-gene-13.9	crovir-transcript-13190
scaffold-ma2	4016363	4018146	Acetylcholinesterase	maker-scaffold-ma2-augustus-gene-13.11	crovir-transcript-13192
scaffold-ma2	4026170	4045822	Acetylcholinesterase	maker-scaffold-ma2-augustus-gene-13.16	crovir-transcript-13194
scaffold-ma5	73971094	73976212	Acetylcholinesterase	maker-scaffold-ma5-augustus-gene-246.2	crovir-transcript-10882
scaffold-ma5	74015346	74036663	Acetylcholinesterase	maker-scaffold-ma5-augustus-gene-246.3	crovir-transcript-10883
scaffold-mi5	3276042	3284747	C-type lectin	maker-scaffold-mi5-augustus-gene-11.7	crovir-transcript-384
scaffold-mi5	11650747	11653723	C-type lectin	maker-scaffold-mi5-augustus-gene-38.4	crovir-transcript-564
scaffold-Z	21883578	21895509	C-type lectin	maker-scaffold-Z-augustus-gene-73.7	crovir-transcript-1910
scaffold-Z	21706900	21776775	C-type lectin	augustus_masked-scaffold-Z-processed-gene-72.2	crovir-transcript-1918
scaffold-Z	21786524	21797211	C-type lectin	maker-scaffold-Z-augustus-gene-72.8	crovir-transcript-1919
scaffold-Z	108214710	108236532	C-type lectin	augustus_masked-scaffold-Z-processed-gene-360.11	crovir-transcript-3069
scaffold-ma1	169434958	169437996	Cysteine-rich secretory protein	maker-scaffold-ma1-augustus-gene-564.2	crovir-transcript-8572
scaffold-ma1	169423774	169434684	Cysteine-rich secretory protein	maker-scaffold-ma1-augustus-gene-564.1	crovir-transcript-8573
scaffold-ma3	25391938	25416947	Cysteine-rich secretory protein	maker-scaffold-ma3-augustus-gene-84.4	crovir-transcript-5023
scaffold-mi6	1021447	1040191	Cysteine-rich secretory protein	maker-scaffold-mi6-augustus-gene-3.15	crovir-transcript-11442
scaffold-mi7	8097114	8103411	Exonuclease	maker-scaffold-mi7-augustus-gene-27.16	crovir-transcript-1466
scaffold-ma1	5804894	5842638	Exonuclease	maker-scaffold-ma1-augustus-gene-19.5	crovir-transcript-6773
scaffold-mi3	10271502	10274220	Exonuclease	maker-scaffold-mi3-augustus-gene-34.12	crovir-transcript-11292
scaffold-ma6	12590208	12591465	Exonuclease	maker-scaffold-ma6-augustus-gene-42.10	crovir-transcript-11720
scaffold-mi4	8493826	8518402	Factor V	maker-scaffold-mi4-augustus-gene-28.16	crovir-transcript-135
scaffold-mi4	8479637	8493564	Factor V	maker-scaffold-mi4-augustus-gene-28.15	crovir-transcript-136
scaffold-ma4	81074882	81113119	Factor V	maker-scaffold-ma4-augustus-gene-270.16	crovir-transcript-3864
scaffold-ma1	256551622	256564040	Glutaminyl cyclase	maker-scaffold-ma1-augustus-gene-855.11	crovir-transcript-9447
scaffold-mi7	5091107	5094268	Glutaminyl cyclase	maker-scaffold-mi7-augustus-gene-17.22	crovir-transcript-1322
scaffold-ma6	14952252	14955850	Hyaluronidase	maker-scaffold-ma6-augustus-gene-49.5	crovir-transcript-11737
scaffold-ma2	45901201	45920587	Hyaluronidase	maker-scaffold-ma2-augustus-gene-153.7	crovir-transcript-13626
scaffold-ma2	49137409	49145188	Hyaluronidase	maker-scaffold-ma2-augustus-gene-163.15	crovir-transcript-13659
scaffold-ma2	49106981	49118469	Hyaluronidase	maker-scaffold-ma2-augustus-gene-163.14	crovir-transcript-13660
scaffold-mi7	3590975	3597607	Kunitz peptide	maker-scaffold-mi7-augustus-gene-12.39	crovir-transcript-1233
scaffold-mi8	4992795	5002390	Kunitz peptide	augustus_masked-scaffold-mi8-processed-gene-16.10	crovir-transcript-16154
scaffold-ma4	56914906	56948498	L-amino acid oxidase	maker-scaffold-ma4-augustus-gene-189.8	crovir-transcript-3611
scaffold-ma4	85461961	85468906	L-amino acid oxidase	maker-scaffold-ma4-augustus-gene-284.10	crovir-transcript-3893
scaffold-ma2	4658599	4661642	L-amino acid oxidase	maker-scaffold-ma2-augustus-gene-15.18	crovir-transcript-13246
scaffold-ma2	4654769	4658293	L-amino acid oxidase	maker-scaffold-ma2-augustus-gene-15.17	crovir-transcript-13249
scaffold-ma1	289328153	289328605	Myotoxin/crotamine	maker-scaffold-ma1-augustus-gene-964.4	crovir-transcript-9762
scaffold-Z	93342025	93347811	Nerve growth factor	augustus_masked-scaffold-Z-processed-gene-311.6	crovir-transcript-2707
scaffold-ma1	76711308	76727703	Nerve growth factor	maker-scaffold-ma1-augustus-gene-255.8	crovir-transcript-7610
scaffold-mi7	3019970	3021876	PLA2	fgenesh-scaffold-mi7-venom-gene-1.1	crovir-transcript-PLA2_gIIE
scaffold-mi7	3027607	3029199	PLA2	fgenesh-scaffold-mi7-venom-gene-1.2	crovir-transcript-PLA2_B1
scaffold-mi7	3031464	3033348	PLA2	fgenesh-scaffold-mi7-venom-gene-1.3	crovir-transcript-PLA2_K
scaffold-mi7	3037103	3038488	PLA2	fgenesh-scaffold-mi7-venom-gene-1.4	crovir-transcript-PLA2_C1
scaffold-mi7	3042118	3043697	PLA2	fgenesh-scaffold-mi7-venom-gene-1.5	crovir-transcript-PLA2_A1
scaffold-mi2	8569773	8575182	Serine Proteinase	fgenesh-scaffold-mi2-venom-gene-3.1	crovir-transcript-SVSP_1
scaffold-mi2	8588278	8593660	Serine Proteinase	fgenesh-scaffold-mi2-venom-gene-3.2	crovir-transcript-SVSP_2
scaffold-mi2	8628274	8636651	Serine Proteinase	fgenesh-scaffold-mi2-venom-gene-3.3	crovir-transcript-SVSP_3
scaffold-mi2	8664603	8670797	Serine Proteinase	fgenesh-scaffold-mi2-venom-gene-3.4	crovir-transcript-SVSP_4
scaffold-mi2	8739986	8745649	Serine Proteinase	fgenesh-scaffold-mi2-venom-gene-3.5	crovir-transcript-SVSP_5
scaffold-mi2	8752578	8759324	Serine Proteinase	fgenesh-scaffold-mi2-venom-gene-3.6	crovir-transcript-SVSP_6
scaffold-mi2	8864675	8879153	Serine Proteinase	fgenesh-scaffold-mi2-venom-gene-3.7	crovir-transcript-SVSP_7
scaffold-mi2	8937526	8947481	Serine Proteinase	fgenesh-scaffold-mi2-venom-gene-3.8	crovir-transcript-SVSP_8
scaffold-mi2	8960028	8980478	Serine Proteinase	fgenesh-scaffold-mi2-venom-gene-3.9	crovir-transcript-SVSP_9
scaffold-mi2	8707633	8717662	Serine Proteinase	fgenesh-scaffold-mi2-venom-gene-3.10	crovir-transcript-SVSP_10
scaffold-mi2	8786671	8797377	Serine Proteinase	fgenesh-scaffold-mi2-venom-gene-3.11	crovir-transcript-SVSP_11
scaffold-mi1	13901629	14014239	Snake venom metalloproteinase	fgenesh-scaffold-mi1-venom-gene-2.1	crovir-transcript-SVMP_1
scaffold-mi1	14022082	14075370	Snake venom metalloproteinase	fgenesh-scaffold-mi1-venom-gene-2.2	crovir-transcript-SVMP_2
scaffold-mi1	14091987	14112667	Snake venom metalloproteinase	fgenesh-scaffold-mi1-venom-gene-2.3	crovir-transcript-SVMP_3
scaffold-mi1	14147865	14170405	Snake venom metalloproteinase	fgenesh-scaffold-mi1-venom-gene-2.4	crovir-transcript-SVMP_4
scaffold-mi1	14174872	14190142	Snake venom metalloproteinase	fgenesh-scaffold-mi1-venom-gene-2.5	crovir-transcript-SVMP_5
scaffold-mi1	14211673	14242249	Snake venom metalloproteinase	fgenesh-scaffold-mi1-venom-gene-2.6	crovir-transcript-SVMP_6
scaffold-mi1	14248933	14272689	Snake venom metalloproteinase	fgenesh-scaffold-mi1-venom-gene-2.7	crovir-transcript-SVMP_7
scaffold-mi1	14281564	14300774	Snake venom metalloproteinase	fgenesh-scaffold-mi1-venom-gene-2.8	crovir-transcript-SVMP_8
scaffold-mi1	14368422	14393313	Snake venom metalloproteinase	fgenesh-scaffold-mi1-venom-gene-2.9	crovir-transcript-SVMP_9
scaffold-mi1	14401627	14424637	Snake venom metalloproteinase	fgenesh-scaffold-mi1-venom-gene-2.10	crovir-transcript-SVMP_10
scaffold-mi1	14310844	14338336	Snake venom metalloproteinase	fgenesh-scaffold-mi1-venom-gene-2.11	crovir-transcript-SVMP_11
scaffold-mi7	5271880	5282014	Veficolin/Ficolin	maker-scaffold-mi7-augustus-gene-17.29	crovir-transcript-1324
scaffold-ma3	179788950	179790745	Veficolin/Ficolin	augustus_masked-scaffold-ma3-processed-gene-598.2	crovir-transcript-6675
scaffold-ma1	232337083	232340714	Veficolin/Ficolin	maker-scaffold-ma1-augustus-gene-774.11	crovir-transcript-9179
scaffold-ma1	232312034	232335439	Veficolin/Ficolin	augustus_masked-scaffold-ma1-processed-gene-774.5	crovir-transcript-9182
scaffold-ma7	40288572	40327884	Vascular endothelial growth factor	maker-scaffold-ma7-augustus-gene-134.2	crovir-transcript-4609
scaffold-ma1	40733075	40747358	Vascular endothelial growth factor	maker-scaffold-ma1-augustus-gene-135.13	crovir-transcript-7188
scaffold-ma1	260248287	260272500	Vascular endothelial growth factor	maker-scaffold-ma1-augustus-gene-867.2	crovir-transcript-9439
scaffold-Z	79798672	79803249	Venom Factor	maker-scaffold-Z-augustus-gene-266.8	crovir-transcript-2488
scaffold-Z	79749464	79761456	Venom Factor	maker-scaffold-Z-augustus-gene-266.6	crovir-transcript-2493
scaffold-ma2	1573588	1616446	Venom Factor	augustus_masked-scaffold-ma2-processed-gene-5.0	crovir-transcript-13141
scaffold-ma2	137559964	137560374	Venom Factor	maker-scaffold-ma2-augustus-gene-458.13	crovir-transcript-14944
scaffold-ma2	137553669	137558461	Venom Factor	maker-scaffold-ma2-augustus-gene-458.12	crovir-transcript-14945
scaffold-ma2	137623562	137648584	Venom Factor	maker-scaffold-ma2-augustus-gene-458.15	crovir-transcript-14949
scaffold-ma2	137651285	137653877	Venom Factor	maker-scaffold-ma2-augustus-gene-458.16	crovir-transcript-14950
scaffold-ma2	137710627	137728987	Venom Factor	maker-scaffold-ma2-augustus-gene-459.4	crovir-transcript-14977
scaffold-ma2	137753804	137775039	Venom Factor	maker-scaffold-ma2-augustus-gene-459.7	crovir-transcript-14979
scaffold-ma2	137735629	137741352	Venom Factor	maker-scaffold-ma2-augustus-gene-459.5	crovir-transcript-14980
scaffold-ma2	4377779	4385668	Vespryn/Ohanin	maker-scaffold-ma2-augustus-gene-14.15	crovir-transcript-13215
scaffold-ma2	109834300	109838076	Vespryn/Ohanin	maker-scaffold-ma2-augustus-gene-366.9	crovir-transcript-14464
scaffold-ma1	204655764	204666466	Waprin	maker-scaffold-ma1-augustus-gene-682.5	crovir-transcript-8898
