# Supplementary material for: Snake venom gene expression is coordinated by novel regulatory architecture and the integration of multiple co-opted vertebrate pathways
Source: HighWire-hosted journal article supplement (doi:10.1101/gr.276251.121), 2022-06-01
Supplement: Supplemental_Code.zip [file nuc_composition.xlsx]

## Sheet: nuc_composition
#	A	C	G	T	Sum	A	C	G	T	MAX	#	Entropy	Low	High	Weight
1	4	2	1	246	253	0.0158103	0.00790514	0.00395257	0.972332	0.972332	1	1.2122	1.119	1.3054	0.7208
2	7	1	255	3	266	0.0263158	0.0037594	0.958647	0.0112782	0.958647	2	1.1603	1.0628	1.2578	0.7578
3	10	2	260	1	273	0.03663	0.00732601	0.952381	0.003663	0.952381	3	1.1443	1.0483	1.2402	0.7778
4	263	5	5	0	273	0.96337	0.018315	0.018315	0	0.96337	4	1.1823	1.0904	1.2741	0.7778
5	270	0	4	0	274	0.985401	0	0.0145985	0	0.985401	5	1.281	1.2096	1.3524	0.7806
6	7	258	5	5	275	0.0254545	0.938182	0.0181818	0.0181818	0.938182	6	1.0737	0.9663	1.1811	0.7835
7	229	12	1	34	276	0.82971	0.0434783	0.00362319	0.123188	0.82971	7	0.8066	0.7026	0.9106	0.7863
8	274	0	2	1	277	0.98917	0	0.00722022	0.00361011	0.98917	8	1.2932	1.2224	1.364	0.7892
9	226	1	48	2	277	0.815884	0.00361011	0.173285	0.00722022	0.815884	9	0.8476	0.7576	0.9377	0.7892
10	114	1	160	3	278	0.410072	0.00359712	0.57554	0.0107914	0.57554	10	0.6239	0.5619	0.6859	0.792
11	109	3	157	7	276	0.394928	0.0108696	0.568841	0.0253623	0.568841	11	0.5501	0.4765	0.6238	0.7863
12	60	6	194	11	271	0.221402	0.0221402	0.715867	0.0405904	0.715867	12	0.5938	0.4955	0.6921	0.7721
13	267	1	5	2	275	0.970909	0.00363636	0.0181818	0.00727273	0.970909	13	1.2091	1.1194	1.2987	0.7835
14	274	0	1	1	276	0.992754	0	0.00362319	0.00362319	0.992754	14	1.3106	1.2447	1.3765	0.7863
15	223	3	43	2	271	0.822878	0.0110701	0.158672	0.00738007	0.822878	15	0.8363	0.7385	0.934	0.7721
16	1	8	37	226	272	0.00367647	0.0294118	0.136029	0.830882	0.830882	16	0.8257	0.7234	0.9281	0.7749
17	1	3	8	264	276	0.00362319	0.0108696	0.0289855	0.956522	0.956522	17	1.1541	1.0581	1.2502	0.7863
18	14	4	255	6	279	0.0501792	0.0143369	0.913978	0.0215054	0.913978	18	0.9987	0.8891	1.1083	0.7949
19	2	4	0	273	279	0.00716846	0.0143369	0	0.978495	0.978495	19	1.2452	1.164	1.3263	0.7949
20	43	1	7	227	278	0.154676	0.00359712	0.0251799	0.816547	0.816547	20	0.8085	0.7101	0.9068	0.792
21	0	4	0	274	278	0	0.0143885	0	0.985612	0.985612	21	1.2822	1.2115	1.3528	0.792
22	241	1	3	36	281	0.857651	0.00355872	0.0106762	0.128114	0.857651	22	0.9097	0.8133	1.0062	0.8006
23	19	2	259	1	281	0.0676157	0.00711744	0.921708	0.00355872	0.921708	23	1.0579	0.9606	1.1552	0.8006
24	1	108	0	171	280	0.00357143	0.385714	0	0.610714	0.610714	24	0.6819	0.6309	0.7329	0.7977
25	0	257	4	17	278	0	0.92446	0.0143885	0.0611511	0.92446	25	1.0631	0.9657	1.1605	0.792
26	7	1	0	275	283	0.024735	0.00353357	0	0.971731	0.971731	26	1.2236	1.1418	1.3055	0.8063
27	275	3	5	1	284	0.96831	0.0105634	0.0176056	0.00352113	0.96831	27	1.1978	1.1075	1.2881	0.8091
28	273	4	2	2	281	0.97153	0.0142349	0.00711744	0.00711744	0.97153	28	1.2089	1.119	1.2988	0.8006
29	3	262	1	18	284	0.0105634	0.922535	0.00352113	0.0633803	0.922535	29	1.054	0.9553	1.1528	0.8091
30	4	1	0	277	282	0.0141844	0.0035461	0	0.98227	0.98227	30	1.2637	1.1874	1.34	0.8034
31	118	1	161	1	281	0.419929	0.00355872	0.572954	0.00355872	0.572954	31	0.651	0.5969	0.7052	0.8006
32	1	13	0	277	291	0.00343643	0.0446735	0	0.95189	0.95189	32	1.1596	1.0739	1.2453	0.8291
33	2	2	3	284	291	0.00687285	0.00687285	0.0103093	0.975945	0.975945	33	1.2283	1.143	1.3137	0.8291
34	9	1	275	6	291	0.0309278	0.00343643	0.945017	0.0206186	0.945017	34	1.1106	1.0124	1.2088	0.8291
35	1	272	9	9	291	0.00343643	0.934708	0.0309278	0.0309278	0.934708	35	1.0744	0.9735	1.1753	0.8291
36	5	3	0	285	293	0.0170648	0.0102389	0	0.972696	0.972696	36	1.2214	1.1382	1.3047	0.8348
37	112	3	7	171	293	0.382253	0.0102389	0.0238908	0.583618	0.583618	37	0.5623	0.4904	0.6343	0.8348
38	0	3	2	290	295	0	0.0101695	0.00677966	0.983051	0.983051	38	1.2658	1.1905	1.341	0.8405
39	0	285	2	10	297	0	0.959596	0.00673401	0.03367	0.959596	39	1.1783	1.0924	1.2642	0.8462
40	1	2	0	293	296	0.00337838	0.00675676	0	0.989865	0.989865	40	1.2981	1.2309	1.3654	0.8433
41	0	93	0	199	292	0	0.318493	0	0.681507	0.681507	41	0.7413	0.6888	0.7939	0.8319
42	41	5	242	4	292	0.140411	0.0171233	0.828767	0.0136986	0.828767	42	0.8177	0.7166	0.9187	0.8319
43	2	268	5	17	292	0.00684932	0.917808	0.0171233	0.0582192	0.917808	43	1.0254	0.9228	1.1281	0.8319
44	1	4	0	157	162	0.00617284	0.0246914	0	0.969136	0.969136	44	1.1961	1.0818	1.3104	0.4615
45	3	1	2	290	296	0.0101351	0.00337838	0.00675676	0.97973	0.97973	45	1.2472	1.1665	1.3278	0.8433
46	3	5	2	286	296	0.0101351	0.0168919	0.00675676	0.966216	0.966216	46	1.1873	1.0964	1.2782	0.8433
47	3	74	0	219	296	0.0101351	0.25	0	0.739865	0.739865	47	0.7561	0.6823	0.8299	0.8433
48	0	0	0	298	298	0	0	0	1	1	48	1.353	1.3076	1.3984	0.849
49	13	4	274	9	300	0.0433333	0.0133333	0.913333	0.03	0.913333	49	0.994	0.8873	1.1006	0.8547
50	4	9	7	280	300	0.0133333	0.03	0.0233333	0.933333	0.933333	50	1.0593	0.9557	1.1629	0.8547
51	301	0	0	0	301	1	0	0	0	1	51	1.3533	1.3082	1.3983	0.8575
52	296	0	2	2	300	0.986667	0	0.00666667	0.00666667	0.986667	52	1.2826	1.2116	1.3536	0.8547
53	5	6	0	289	300	0.0166667	0.02	0	0.963333	0.963333	53	1.184	1.0966	1.2714	0.8547
54	3	265	1	28	297	0.010101	0.892256	0.003367	0.0942761	0.892256	54	0.9829	0.8871	1.0786	0.8462
55	248	2	49	1	300	0.826667	0.00666667	0.163333	0.00333333	0.826667	55	0.8681	0.781	0.9552	0.8547
56	14	1	283	2	300	0.0466667	0.00333333	0.943333	0.00666667	0.943333	56	1.1198	1.0276	1.212	0.8547
57	3	251	0	44	298	0.0100671	0.842282	0	0.147651	0.842282	57	0.8973	0.81	0.9845	0.849
58	44	4	68	182	298	0.147651	0.0134228	0.228188	0.610738	0.610738	58	0.4056	0.3279	0.4833	0.849
59	0	4	0	295	299	0	0.0133779	0	0.986622	0.986622	59	1.2881	1.2213	1.355	0.8519
60	1	5	0	293	299	0.00334448	0.0167224	0	0.979933	0.979933	60	1.2558	1.1805	1.3311	0.8519
61	3	0	3	295	301	0.00996678	0	0.00996678	0.980066	0.980066	61	1.2526	1.1754	1.3298	0.8575
62	7	6	283	6	302	0.0231788	0.0198675	0.937086	0.0198675	0.937086	62	1.0702	0.9671	1.1733	0.8604
63	9	254	8	26	297	0.030303	0.855219	0.026936	0.0875421	0.855219	63	0.8285	0.7185	0.9385	0.8462
64	228	6	65	1	300	0.76	0.02	0.216667	0.00333333	0.76	64	0.7396	0.654	0.8251	0.8547
65	2	176	1	121	300	0.00666667	0.586667	0.00333333	0.403333	0.586667	65	0.6447	0.5879	0.7015	0.8547
66	1	284	5	10	300	0.00333333	0.946667	0.0166667	0.0333333	0.946667	66	1.1187	1.023	1.2144	0.8547
67	296	1	3	2	302	0.980132	0.00331126	0.00993377	0.00662252	0.980132	67	1.2494	1.17	1.3288	0.8604
68	12	1	285	6	304	0.0394737	0.00328947	0.9375	0.0197368	0.9375	68	1.0877	0.9906	1.1849	0.8661
69	121	1	181	0	303	0.39934	0.00330033	0.59736	0	0.59736	69	0.6784	0.6316	0.7252	0.8632
70	12	6	283	1	302	0.0397351	0.0198675	0.937086	0.00331126	0.937086	70	1.0862	0.9887	1.1838	0.8604
71	296	0	3	2	301	0.983389	0	0.00996678	0.00664452	0.983389	71	1.2677	1.1936	1.3418	0.8575
72	299	2	1	0	302	0.990066	0.00662252	0.00331126	0	0.990066	72	1.2996	1.2334	1.3658	0.8604
73	302	2	0	0	304	0.993421	0.00657895	0	0	0.993421	73	1.3186	1.2596	1.3776	0.8661
74	3	1	0	300	304	0.00986842	0.00328947	0	0.986842	0.986842	74	1.285	1.2156	1.3544	0.8661
75	2	73	3	226	304	0.00657895	0.240132	0.00986842	0.743421	0.743421	75	0.7353	0.6545	0.8161	0.8661
76	0	2	2	300	304	0	0.00657895	0.00657895	0.986842	0.986842	76	1.2837	1.2134	1.354	0.8661
77	1	289	0	14	304	0.00328947	0.950658	0	0.0460526	0.950658	77	1.1571	1.0732	1.2409	0.8661
78	299	2	1	2	304	0.983553	0.00657895	0.00328947	0.00657895	0.983553	78	1.2652	1.1891	1.3412	0.8661
79	4	5	0	295	304	0.0131579	0.0164474	0	0.970395	0.970395	79	1.2122	1.1289	1.2954	0.8661
80	11	2	289	1	303	0.0363036	0.00660066	0.953795	0.00330033	0.953795	80	1.1523	1.0623	1.2423	0.8632
81	4	279	3	18	304	0.0131579	0.917763	0.00986842	0.0592105	0.917763	81	1.0255	0.9246	1.1264	0.8661
82	297	4	2	1	304	0.976974	0.0131579	0.00657895	0.00328947	0.976974	82	1.2361	1.1547	1.3174	0.8661
83	275	1	27	1	304	0.904605	0.00328947	0.0888158	0.00328947	0.904605	83	1.0276	0.9377	1.1176	0.8661
84	13	2	285	5	305	0.042623	0.00655738	0.934426	0.0163934	0.934426	84	1.0749	0.976	1.1737	0.8689
85	3	209	5	86	303	0.00990099	0.689769	0.0165017	0.283828	0.689769	85	0.652	0.5726	0.7315	0.8632
86	78	5	140	79	302	0.258278	0.0165563	0.463576	0.261589	0.463576	86	0.2615	0.2077	0.3153	0.8604
87	5	3	2	296	306	0.0163399	0.00980392	0.00653595	0.96732	0.96732	87	1.1925	1.1037	1.2812	0.8718
88	10	2	293	1	306	0.0326797	0.00653595	0.957516	0.00326797	0.957516	88	1.1647	1.076	1.2534	0.8718
89	41	0	265	0	306	0.133987	0	0.866013	0	0.866013	89	0.9714	0.8932	1.0495	0.8718
90	13	2	286	1	302	0.0430464	0.00662252	0.94702	0.00331126	0.94702	90	1.1311	1.0397	1.2224	0.8604
91	296	0	4	4	304	0.973684	0	0.0131579	0.0131579	0.973684	91	1.2255	1.1441	1.3069	0.8661
92	295	5	4	1	305	0.967213	0.0163934	0.0131148	0.00327869	0.967213	92	1.1942	1.1064	1.282	0.8689
93	270	5	3	27	305	0.885246	0.0163934	0.00983607	0.0885246	0.885246	93	0.9403	0.8388	1.0418	0.8689
94	4	271	1	22	298	0.0134228	0.909396	0.0033557	0.0738255	0.909396	94	1.0169	0.9192	1.1147	0.849
95	265	3	26	3	297	0.892256	0.010101	0.0875421	0.010101	0.892256	95	0.9667	0.8662	1.0673	0.8462
96	5	23	2	274	304	0.0164474	0.0756579	0.00657895	0.901316	0.901316	96	0.985	0.8846	1.0853	0.8661
97	16	0	284	6	306	0.0522876	0	0.928105	0.0196078	0.928105	97	1.0687	0.9745	1.1629	0.8718
98	2	7	2	297	308	0.00649351	0.0227273	0.00649351	0.964286	0.964286	98	1.1836	1.095	1.2722	0.8775
99	304	2	3	0	309	0.983819	0.00647249	0.00970874	0	0.983819	99	1.2702	1.1976	1.3429	0.8803
100	2	298	3	7	310	0.00645161	0.96129	0.00967742	0.0225806	0.96129	100	1.1699	1.0794	1.2604	0.8832
101	292	4	8	2	306	0.954248	0.0130719	0.0261438	0.00653595	0.954248	101	1.142	1.0478	1.2362	0.8718
102	2	34	2	267	305	0.00655738	0.111475	0.00655738	0.87541	0.87541	102	0.947	0.8531	1.0408	0.8689
103	24	1	279	5	309	0.0776699	0.00323625	0.902913	0.0161812	0.902913	103	0.9976	0.9007	1.0945	0.8803
104	14	3	289	2	308	0.0454545	0.00974026	0.938312	0.00649351	0.938312	104	1.0943	0.9987	1.1899	0.8775
105	298	3	6	2	309	0.964401	0.00970874	0.0194175	0.00647249	0.964401	105	1.1814	1.0919	1.2709	0.8803
106	1	2	0	293	296	0.00337838	0.00675676	0	0.989865	0.989865	106	1.2981	1.2309	1.3654	0.8433
107	21	0	270	4	295	0.0711864	0	0.915254	0.0135593	0.915254	107	1.0414	0.947	1.1357	0.8405
108	15	32	182	67	296	0.0506757	0.108108	0.614865	0.226351	0.614865	108	0.3592	0.2739	0.4445	0.8433
109	18	1	275	2	296	0.0608108	0.00337838	0.929054	0.00675676	0.929054	109	1.0792	0.9851	1.1733	0.8433
110	288	1	7	0	296	0.972973	0.00337838	0.0236486	0	0.972973	110	1.2293	1.15	1.3085	0.8433
111	0	3	0	304	307	0	0.00977199	0	0.990228	0.990228	111	1.3042	1.2417	1.3667	0.8746
112	141	3	160	3	307	0.459283	0.00977199	0.521173	0.00977199	0.521173	112	0.5916	0.5306	0.6526	0.8746
113	3	6	1	296	306	0.00980392	0.0196078	0.00326797	0.96732	0.96732	113	1.196	1.109	1.283	0.8718
114	300	1	6	1	308	0.974026	0.00324675	0.0194805	0.00324675	0.974026	114	1.2279	1.1473	1.3086	0.8775
115	3	277	8	22	310	0.00967742	0.893548	0.0258065	0.0709677	0.893548	115	0.9486	0.8452	1.052	0.8832
116	2	3	3	303	311	0.00643087	0.0096463	0.0096463	0.974277	0.974277	116	1.2219	1.138	1.3058	0.886
117	16	0	295	1	312	0.0512821	0	0.945513	0.00320513	0.945513	117	1.1427	1.0595	1.226	0.8889
118	305	1	0	0	306	0.996732	0.00326797	0	0	0.996732	118	1.3352	1.282	1.3885	0.8718
119	15	4	283	3	305	0.0491803	0.0131148	0.927869	0.00983607	0.927869	119	1.0538	0.9537	1.154	0.8689
120	12	1	292	3	308	0.038961	0.00324675	0.948052	0.00974026	0.948052	120	1.1301	1.0382	1.222	0.8775
121	298	5	3	2	308	0.967532	0.0162338	0.00974026	0.00649351	0.967532	121	1.1935	1.1052	1.2818	0.8775
122	22	2	281	5	310	0.0709677	0.00645161	0.906452	0.016129	0.906452	122	0.9986	0.8994	1.0979	0.8832
123	18	1	293	0	312	0.0576923	0.00320513	0.939103	0	0.939103	123	1.1247	1.0409	1.2086	0.8889
124	19	2	290	1	312	0.0608974	0.00641026	0.929487	0.00320513	0.929487	124	1.0822	0.991	1.1734	0.8889
125	310	0	3	2	315	0.984127	0	0.00952381	0.00634921	0.984127	125	1.272	1.2004	1.3436	0.8974
126	309	1	3	2	315	0.980952	0.0031746	0.00952381	0.00634921	0.980952	126	1.254	1.1771	1.3309	0.8974
127	1	8	3	302	314	0.00318471	0.0254777	0.00955414	0.961783	0.961783	127	1.1764	1.0887	1.2642	0.8946
128	314	0	3	0	317	0.990536	0	0.00946372	0	0.990536	128	1.3063	1.2453	1.3673	0.9031
129	310	1	3	1	315	0.984127	0.0031746	0.00952381	0.0031746	0.984127	129	1.2699	1.1967	1.3431	0.8974
130	12	2	300	1	315	0.0380952	0.00634921	0.952381	0.0031746	0.952381	130	1.149	1.0608	1.2373	0.8974
131	12	1	294	4	311	0.0385852	0.00321543	0.945338	0.0128617	0.945338	131	1.1183	1.0252	1.2114	0.886
132	16	2	292	3	313	0.0511182	0.00638978	0.932907	0.00958466	0.932907	132	1.0792	0.984	1.1744	0.8917
133	303	4	5	1	313	0.968051	0.0127796	0.0159744	0.00319489	0.968051	133	1.1981	1.112	1.2843	0.8917
134	23	11	278	2	314	0.0732484	0.0350318	0.88535	0.00636943	0.88535	134	0.9274	0.8251	1.0297	0.8946
135	4	5	2	301	312	0.0128205	0.0160256	0.00641026	0.964744	0.964744	135	1.1817	1.0923	1.2711	0.8889
136	23	1	285	3	312	0.0737179	0.00320513	0.913462	0.00961538	0.913462	136	1.0346	0.9411	1.1282	0.8889
137	1	5	0	302	308	0.00324675	0.0162338	0	0.980519	0.980519	137	1.2589	1.1853	1.3325	0.8775
138	296	1	4	7	308	0.961039	0.00324675	0.012987	0.0227273	0.961039	138	1.171	1.0812	1.2608	0.8775
139	0	287	4	12	303	0	0.947195	0.0132013	0.039604	0.947195	139	1.1313	1.0408	1.2219	0.8632
140	299	2	2	1	304	0.983553	0.00657895	0.00657895	0.00328947	0.983553	140	1.2652	1.1891	1.3412	0.8661
141	11	2	282	9	304	0.0361842	0.00657895	0.927632	0.0296053	0.927632	141	1.0469	0.9451	1.1486	0.8661
142	11	2	293	0	306	0.0359477	0.00653595	0.957516	0	0.957516	142	1.1724	1.0875	1.2573	0.8718
143	300	0	5	1	306	0.980392	0	0.0163399	0.00326797	0.980392	143	1.2582	1.1842	1.3322	0.8718
144	299	0	5	2	306	0.977124	0	0.0163399	0.00653595	0.977124	144	1.242	1.1642	1.3198	0.8718
145	5	6	1	292	304	0.0164474	0.0197368	0.00328947	0.960526	0.960526	145	1.1677	1.0766	1.2588	0.8661
146	5	0	293	7	305	0.0163934	0	0.960656	0.0229508	0.960656	146	1.1745	1.0868	1.2621	0.8689
147	303	0	4	0	307	0.986971	0	0.0130293	0	0.986971	147	1.2902	1.2247	1.3557	0.8746
148	2	17	2	281	302	0.00662252	0.0562914	0.00662252	0.930464	0.930464	148	1.0765	0.981	1.172	0.8604
149	0	5	6	297	308	0	0.0162338	0.0194805	0.964286	0.964286	149	1.1882	1.1024	1.274	0.8775
150	7	0	293	11	311	0.022508	0	0.942122	0.0353698	0.942122	150	1.1092	1.0169	1.2015	0.886
151	293	2	10	6	311	0.942122	0.00643087	0.0321543	0.0192926	0.942122	151	1.0977	1.0004	1.195	0.886
152	1	4	3	310	318	0.00314465	0.0125786	0.00943396	0.974843	0.974843	152	1.2269	1.1456	1.3083	0.906
153	24	1	292	1	318	0.0754717	0.00314465	0.918239	0.00314465	0.918239	153	1.0615	0.9737	1.1493	0.906
154	3	5	0	312	320	0.009375	0.015625	0	0.975	0.975	154	1.2326	1.1546	1.3107	0.9117
155	2	306	1	11	320	0.00625	0.95625	0.003125	0.034375	0.95625	155	1.162	1.0753	1.2487	0.9117
156	2	1	0	316	319	0.00626959	0.0031348	0	0.990596	0.990596	156	1.3034	1.24	1.3668	0.9088
157	0	1	1	318	320	0	0.003125	0.003125	0.99375	0.99375	157	1.3193	1.2607	1.378	0.9117
158	1	203	0	115	319	0.0031348	0.636364	0	0.360502	0.636364	158	0.6985	0.6489	0.7482	0.9088
159	4	257	1	59	321	0.0124611	0.800623	0.00311526	0.183801	0.800623	159	0.8139	0.7295	0.8984	0.9145
160	4	1	2	316	323	0.0123839	0.00309598	0.00619195	0.978328	0.978328	160	1.2433	1.1655	1.321	0.9202
161	1	1	1	320	323	0.00309598	0.00309598	0.00309598	0.990712	0.990712	161	1.3022	1.2376	1.3668	0.9202
162	305	0	11	6	322	0.947205	0	0.0341615	0.0186335	0.947205	162	1.1281	1.039	1.2172	0.9174
163	1	12	2	309	324	0.00308642	0.037037	0.00617284	0.953704	0.953704	163	1.1541	1.0676	1.2407	0.9231
164	84	0	238	1	323	0.260062	0	0.736842	0.00309598	0.736842	164	0.7782	0.7147	0.8417	0.9202
165	259	6	3	57	325	0.796923	0.0184615	0.00923077	0.175385	0.796923	165	0.7752	0.6846	0.8658	0.9259
166	2	5	21	297	325	0.00615385	0.0153846	0.0646154	0.913846	0.913846	166	1.0198	0.9233	1.1162	0.9259
167	29	2	294	0	325	0.0892308	0.00615385	0.904615	0	0.904615	167	1.0319	0.9466	1.1172	0.9259
168	6	13	3	304	326	0.0184049	0.0398773	0.00920245	0.932515	0.932515	168	1.0643	0.9667	1.1619	0.9288
169	321	1	3	1	326	0.984663	0.00306748	0.00920245	0.00306748	0.984663	169	1.2731	1.2018	1.3444	0.9288
170	319	0	5	2	326	0.978528	0	0.0153374	0.00613497	0.978528	170	1.2491	1.1749	1.3233	0.9288
171	4	5	1	316	326	0.0122699	0.0153374	0.00306748	0.969325	0.969325	171	1.2041	1.1205	1.2878	0.9288
172	69	0	261	3	333	0.207207	0	0.783784	0.00900901	0.783784	172	0.8133	0.7387	0.8879	0.9487
173	77	1	252	2	332	0.231928	0.00301205	0.759036	0.0060241	0.759036	173	0.7792	0.7058	0.8525	0.9459
174	1	311	3	13	328	0.00304878	0.948171	0.00914634	0.0396341	0.948171	174	1.1326	1.0441	1.2212	0.9345
175	2	7	1	318	328	0.00609756	0.0213415	0.00304878	0.969512	0.969512	175	1.2088	1.1272	1.2904	0.9345
176	1	319	2	9	331	0.00302115	0.963746	0.0060423	0.0271903	0.963746	176	1.1883	1.1052	1.2714	0.943
177	0	5	2	323	330	0	0.0151515	0.00606061	0.978788	0.978788	177	1.2505	1.1769	1.324	0.9402
178	31	4	293	3	331	0.0936556	0.0120846	0.885196	0.00906344	0.885196	178	0.9503	0.8549	1.0457	0.943
179	4	4	0	321	329	0.0121581	0.0121581	0	0.975684	0.975684	179	1.2353	1.1586	1.3121	0.9373
180	0	5	5	324	334	0	0.0149701	0.0149701	0.97006	0.97006	180	1.2123	1.1328	1.2918	0.9516
181	13	2	318	1	334	0.0389222	0.00598802	0.952096	0.00299401	0.952096	181	1.15	1.0647	1.2353	0.9516
182	0	4	1	329	334	0	0.011976	0.00299401	0.98503	0.98503	182	1.2794	1.2122	1.3465	0.9516
183	2	317	1	13	333	0.00600601	0.951952	0.003003	0.039039	0.951952	183	1.1495	1.0639	1.235	0.9487
184	2	6	4	323	335	0.00597015	0.0179104	0.0119403	0.964179	0.964179	184	1.1811	1.0949	1.2674	0.9544
185	17	3	313	2	335	0.0507463	0.00895522	0.934328	0.00597015	0.934328	185	1.0859	0.9946	1.1772	0.9544
186	321	2	8	3	334	0.961078	0.00598802	0.0239521	0.00898204	0.961078	186	1.1713	1.0845	1.2581	0.9516
187	1	3	0	329	333	0.003003	0.00900901	0	0.987988	0.987988	187	1.2923	1.2276	1.3569	0.9487
188	4	1	28	298	331	0.0120846	0.00302115	0.0845921	0.900302	0.900302	188	0.9996	0.9079	1.0913	0.943
189	0	7	2	323	332	0	0.0210843	0.0060241	0.972892	0.972892	189	1.2277	1.1514	1.304	0.9459
190	2	3	1	325	331	0.0060423	0.00906344	0.00302115	0.981873	0.981873	190	1.2593	1.1852	1.3333	0.943
191	6	278	32	17	333	0.018018	0.834835	0.0960961	0.0510511	0.834835	191	0.7801	0.6773	0.8829	0.9487
192	331	1	0	3	335	0.98806	0.00298507	0	0.00895522	0.98806	192	1.2927	1.2283	1.3571	0.9544
193	2	10	1	322	335	0.00597015	0.0298507	0.00298507	0.961194	0.961194	193	1.1798	1.0966	1.2631	0.9544
194	0	3	2	331	336	0	0.00892857	0.00595238	0.985119	0.985119	194	1.2779	1.2097	1.346	0.9573
195	10	0	324	2	336	0.0297619	0	0.964286	0.00595238	0.964286	195	1.1973	1.1185	1.2761	0.9573
196	8	2	322	3	335	0.0238806	0.00597015	0.961194	0.00895522	0.961194	196	1.1718	1.0852	1.2584	0.9544
197	1	314	3	18	336	0.00297619	0.934524	0.00892857	0.0535714	0.934524	197	1.0931	1.0042	1.1819	0.9573
198	1	1	1	335	338	0.00295858	0.00295858	0.00295858	0.991124	0.991124	198	1.3053	1.243	1.3676	0.963
199	325	2	7	3	337	0.964392	0.00593472	0.0207715	0.00890208	0.964392	199	1.1838	1.0985	1.269	0.9601
200	326	3	8	0	337	0.967359	0.00890208	0.0237389	0	0.967359	200	1.2048	1.1256	1.284	0.9601
201	6	302	4	25	337	0.0178042	0.896142	0.0118694	0.074184	0.896142	201	0.9612	0.8628	1.0595	0.9601
202	319	4	11	1	335	0.952239	0.0119403	0.0328358	0.00298507	0.952239	202	1.143	1.055	1.2309	0.9544
203	333	1	1	4	339	0.982301	0.00294985	0.00294985	0.0117994	0.982301	203	1.2637	1.1922	1.3353	0.9658
204	329	2	3	4	338	0.973373	0.00591716	0.00887574	0.0118343	0.973373	204	1.2196	1.1388	1.3004	0.963
205	21	1	312	3	337	0.0623145	0.00296736	0.925816	0.00890208	0.925816	205	1.0693	0.9802	1.1585	0.9601
206	0	3	1	337	341	0	0.00879765	0.00293255	0.98827	0.98827	206	1.2941	1.2306	1.3576	0.9715
207	4	1	19	319	343	0.0116618	0.00291545	0.0553936	0.930029	0.930029	207	1.0767	0.9872	1.1661	0.9772
208	2	2	10	331	345	0.0057971	0.0057971	0.0289855	0.95942	0.95942	208	1.1698	1.0855	1.2542	0.9829
209	339	2	4	1	346	0.979769	0.00578035	0.0115607	0.00289017	0.979769	209	1.251	1.1772	1.3248	0.9858
210	1	4	3	338	346	0.00289017	0.0115607	0.00867052	0.976879	0.976879	210	1.2374	1.1611	1.3138	0.9858
211	344	0	2	0	346	0.99422	0	0.00578035	0	0.99422	211	1.3255	1.2722	1.3788	0.9858
212	343	2	1	1	347	0.988473	0.00576369	0.00288184	0.00288184	0.988473	212	1.2923	1.2274	1.3573	0.9886
213	345	0	1	2	348	0.991379	0	0.00287356	0.00574713	0.991379	213	1.3091	1.2499	1.3684	0.9915
214	21	0	326	0	347	0.0605187	0	0.939481	0	0.939481	214	1.137	1.062	1.212	0.9886
215	1	326	3	15	345	0.00289855	0.944928	0.00869565	0.0434783	0.944928	215	1.1243	1.0379	1.2108	0.9829
216	327	5	15	0	347	0.942363	0.0144092	0.0432277	0	0.942363	216	1.1174	1.0319	1.2029	0.9886
217	344	2	1	0	347	0.991354	0.00576369	0.00288184	0	0.991354	217	1.309	1.2496	1.3684	0.9886
218	4	3	2	338	347	0.0115274	0.00864553	0.00576369	0.974063	0.974063	218	1.2231	1.1439	1.3024	0.9886
219	7	3	324	11	345	0.0202899	0.00869565	0.93913	0.0318841	0.93913	219	1.0857	0.9916	1.1797	0.9829
220	4	321	4	19	348	0.0114943	0.922414	0.0114943	0.0545977	0.922414	220	1.0396	0.9454	1.1338	0.9915
221	1	18	0	329	348	0.00287356	0.0517241	0	0.945402	0.945402	221	1.1451	1.0668	1.2233	0.9915
222	341	1	3	3	348	0.979885	0.00287356	0.00862069	0.00862069	0.979885	222	1.2508	1.1769	1.3248	0.9915
223	2	303	4	38	347	0.00576369	0.873199	0.0115274	0.10951	0.873199	223	0.9343	0.8441	1.0245	0.9886
224	2	181	1	161	345	0.0057971	0.524638	0.00289855	0.466667	0.524638	224	0.6364	0.5884	0.6843	0.9829
225	342	1	1	2	346	0.988439	0.00289017	0.00289017	0.00578035	0.988439	225	1.2921	1.227	1.3572	0.9858
226	336	2	7	1	346	0.971098	0.00578035	0.0202312	0.00289017	0.971098	226	1.2162	1.1378	1.2946	0.9858
227	4	290	1	53	348	0.0114943	0.833333	0.00287356	0.152299	0.833333	227	0.8693	0.7852	0.9533	0.9915
228	3	5	3	337	348	0.00862069	0.0143678	0.00862069	0.968391	0.968391	228	1.198	1.115	1.2809	0.9915
229	0	3	1	345	349	0	0.00859599	0.00286533	0.988539	0.988539	229	1.2958	1.2335	1.3582	0.9943
230	1	14	1	333	349	0.00286533	0.0401146	0.00286533	0.954155	0.954155	230	1.1634	1.0828	1.2439	0.9943
231	2	330	1	18	351	0.00569801	0.940171	0.002849	0.0512821	0.940171	231	1.1158	1.0314	1.2002	1
232	3	14	2	327	346	0.00867052	0.0404624	0.00578035	0.945087	0.945087	232	1.1192	1.0307	1.2076	0.9858
233	334	0	10	2	346	0.965318	0	0.0289017	0.00578035	0.965318	233	1.2016	1.1244	1.2788	0.9858
234	335	0	4	7	346	0.968208	0	0.0115607	0.0202312	0.968208	234	1.2065	1.128	1.2851	0.9858
235	12	2	256	73	343	0.0349854	0.0058309	0.746356	0.212828	0.746356	235	0.6848	0.6008	0.7688	0.9772
236	54	0	287	6	347	0.15562	0	0.827089	0.0172911	0.827089	236	0.8569	0.7744	0.9395	0.9886
237	2	84	5	256	347	0.00576369	0.242075	0.0144092	0.737752	0.737752	237	0.7199	0.6433	0.7966	0.9886
238	41	8	294	5	348	0.117816	0.0229885	0.844828	0.0143678	0.844828	238	0.8368	0.7406	0.9331	0.9915
239	2	3	10	331	346	0.00578035	0.00867052	0.0289017	0.956647	0.956647	239	1.1568	1.0705	1.2431	0.9858
240	17	1	322	6	346	0.0491329	0.00289017	0.930636	0.017341	0.930636	240	1.0717	0.9808	1.1626	0.9858
241	26	1	314	5	346	0.0751445	0.00289017	0.907514	0.0144509	0.907514	241	1.0138	0.9231	1.1045	0.9858
242	3	330	0	13	346	0.00867052	0.953757	0	0.0375723	0.953757	242	1.1594	1.0779	1.241	0.9858
243	336	1	7	4	348	0.965517	0.00287356	0.0201149	0.0114943	0.965517	243	1.1908	1.1085	1.2731	0.9915
244	2	316	5	23	346	0.00578035	0.913295	0.0144509	0.066474	0.913295	244	1.0212	0.9282	1.1141	0.9858
245	3	5	4	334	346	0.00867052	0.0144509	0.0115607	0.965318	0.965318	245	1.1844	1.0993	1.2695	0.9858
246	0	4	0	342	346	0	0.0115607	0	0.988439	0.988439	246	1.2991	1.2392	1.3589	0.9858
247	1	328	2	14	345	0.00289855	0.950725	0.0057971	0.0405797	0.950725	247	1.1467	1.0628	1.2307	0.9829
248	2	4	0	340	346	0.00578035	0.0115607	0	0.982659	0.982659	248	1.2677	1.1986	1.3367	0.9858
249	8	1	335	2	346	0.0231214	0.00289017	0.968208	0.00578035	0.968208	249	1.2055	1.1259	1.285	0.9858
250	97	0	246	2	345	0.281159	0	0.713043	0.0057971	0.713043	250	0.7455	0.6846	0.8065	0.9829
251	340	2	3	1	346	0.982659	0.00578035	0.00867052	0.00289017	0.982659	251	1.2638	1.1922	1.3354	0.9858
252	3	213	1	128	345	0.00869565	0.617391	0.00289855	0.371014	0.617391	252	0.6538	0.5972	0.7104	0.9829
253	86	5	252	3	346	0.248555	0.0144509	0.728324	0.00867052	0.728324	253	0.6999	0.6223	0.7775	0.9858
254	6	81	1	257	345	0.0173913	0.234783	0.00289855	0.744928	0.744928	254	0.7308	0.6543	0.8072	0.9829
255	312	0	30	0	342	0.912281	0	0.0877193	0	0.912281	255	1.0688	0.9925	1.1451	0.9744
256	332	6	6	0	344	0.965116	0.0174419	0.0174419	0	0.965116	256	1.1931	1.1124	1.2738	0.9801
257	1	307	1	35	344	0.00290698	0.892442	0.00290698	0.101744	0.892442	257	1.0047	0.9215	1.0879	0.9801
258	11	8	32	273	324	0.0339506	0.0246914	0.0987654	0.842593	0.842593	258	0.8006	0.696	0.9052	0.9231
259	6	282	34	12	334	0.0179641	0.844311	0.101796	0.0359281	0.844311	259	0.8124	0.7106	0.9142	0.9516
260	1	3	3	337	344	0.00290698	0.00872093	0.00872093	0.979651	0.979651	260	1.2496	1.175	1.3241	0.9801
261	10	1	330	3	344	0.0290698	0.00290698	0.959302	0.00872093	0.959302	261	1.1705	1.0866	1.2544	0.9801
262	2	316	1	24	343	0.0058309	0.921283	0.00291545	0.0699708	0.921283	262	1.0641	0.9776	1.1506	0.9772
263	1	338	1	1	341	0.00293255	0.991202	0.00293255	0.00293255	0.991202	263	1.3059	1.244	1.3678	0.9715
264	333	2	3	5	343	0.970845	0.0058309	0.00874636	0.0145773	0.970845	264	1.2094	1.1278	1.291	0.9772
265	18	5	315	7	345	0.0521739	0.0144928	0.913043	0.0202899	0.913043	265	0.9991	0.9005	1.0978	0.9829
266	8	204	13	120	345	0.0231884	0.591304	0.0376812	0.347826	0.591304	266	0.4945	0.4211	0.5679	0.9829
267	85	7	245	7	344	0.247093	0.0203488	0.712209	0.0203488	0.712209	267	0.6355	0.5528	0.7183	0.9801
268	0	4	1	339	344	0	0.0116279	0.00290698	0.985465	0.985465	268	1.2819	1.2163	1.3476	0.9801
269	0	5	0	338	343	0	0.0145773	0	0.985423	0.985423	269	1.2862	1.2237	1.3488	0.9772
270	0	333	3	5	341	0	0.97654	0.00879765	0.0146628	0.97654	270	1.2403	1.1658	1.3147	0.9715
271	336	4	3	1	344	0.976744	0.0116279	0.00872093	0.00290698	0.976744	271	1.2367	1.1601	1.3134	0.9801
272	10	5	326	3	344	0.0290698	0.0145349	0.947674	0.00872093	0.947674	272	1.1174	1.0258	1.209	0.9801
273	335	2	6	2	345	0.971014	0.0057971	0.0173913	0.0057971	0.971014	273	1.2122	1.1319	1.2926	0.9829
274	1	14	0	330	345	0.00289855	0.0405797	0	0.956522	0.956522	274	1.178	1.101	1.2551	0.9829
275	3	12	3	326	344	0.00872093	0.0348837	0.00872093	0.947674	0.947674	275	1.1228	1.033	1.2127	0.9801
276	20	1	315	8	344	0.0581395	0.00290698	0.915698	0.0232558	0.915698	276	1.0242	0.9308	1.1176	0.9801
277	4	4	2	335	345	0.0115942	0.0115942	0.0057971	0.971014	0.971014	277	1.2096	1.1281	1.2911	0.9829
278	3	19	15	304	341	0.00879765	0.0557185	0.0439883	0.891496	0.891496	278	0.9351	0.8349	1.0354	0.9715
279	10	3	175	152	340	0.0294118	0.00882353	0.514706	0.447059	0.514706	279	0.5342	0.4707	0.5978	0.9687
280	13	66	244	18	341	0.0381232	0.193548	0.715543	0.0527859	0.715543	280	0.5465	0.4547	0.6382	0.9715
281	2	314	4	18	338	0.00591716	0.928994	0.0118343	0.0532544	0.928994	281	1.0667	0.9741	1.1592	0.963
282	2	318	1	17	338	0.00591716	0.940828	0.00295858	0.0502959	0.940828	282	1.1165	1.0303	1.2027	0.963
283	335	1	1	1	338	0.991124	0.00295858	0.00295858	0.00295858	0.991124	283	1.3053	1.243	1.3676	0.963
284	0	302	3	31	336	0	0.89881	0.00892857	0.0922619	0.89881	284	1.0128	0.9272	1.0984	0.9573
285	1	332	0	6	339	0.00294985	0.979351	0	0.0176991	0.979351	285	1.2566	1.1863	1.3268	0.9658
286	7	318	2	10	337	0.0207715	0.94362	0.00593472	0.0296736	0.94362	286	1.1038	1.0107	1.1969	0.9601
287	329	0	7	2	338	0.973373	0	0.0207101	0.00591716	0.973373	287	1.2299	1.1546	1.3052	0.963
288	14	1	320	1	336	0.0416667	0.00297619	0.952381	0.00297619	0.952381	288	1.1568	1.0742	1.2395	0.9573
289	14	248	65	11	338	0.0414201	0.733728	0.192308	0.0325444	0.733728	289	0.5952	0.5025	0.6879	0.963
290	78	19	2	239	338	0.230769	0.056213	0.00591716	0.707101	0.707101	290	0.6053	0.5232	0.6874	0.963
291	35	67	226	8	336	0.104167	0.199405	0.672619	0.0238095	0.672619	291	0.4714	0.3858	0.5571	0.9573
292	5	200	0	60	265	0.0188679	0.754717	0	0.226415	0.754717	292	0.7481	0.6628	0.8335	0.755
293	0	19	2	318	339	0	0.0560472	0.00589971	0.938053	0.938053	293	1.1172	1.0345	1.1999	0.9658
294	1	0	1	338	340	0.00294118	0	0.00294118	0.994118	0.994118	294	1.3226	1.2667	1.3785	0.9687
295	247	19	18	56	340	0.726471	0.0558824	0.0529412	0.164706	0.726471	295	0.538	0.4432	0.6329	0.9687
296	273	0	2	61	336	0.8125	0	0.00595238	0.181548	0.8125	296	0.8629	0.7873	0.9385	0.9573
297	0	20	1	318	339	0	0.0589971	0.00294985	0.938053	0.938053	297	1.1239	1.0438	1.204	0.9658
298	1	2	0	339	342	0.00292398	0.00584795	0	0.991228	0.991228	298	1.308	1.248	1.3681	0.9744
299	0	57	1	283	341	0	0.167155	0.00293255	0.829912	0.829912	299	0.9	0.8259	0.974	0.9715
300	19	2	318	3	342	0.0555556	0.00584795	0.929825	0.00877193	0.929825	300	1.074	0.9835	1.1645	0.9744
301	333	4	4	1	342	0.973684	0.0116959	0.0116959	0.00292398	0.973684	301	1.2232	1.1441	1.3022	0.9744
302	0	3	0	339	342	0	0.00877193	0	0.991228	0.991228	302	1.3111	1.2537	1.3686	0.9744
303	2	309	6	26	343	0.0058309	0.900875	0.0174927	0.0758017	0.900875	303	0.9854	0.8911	1.0798	0.9772
304	321	1	11	1	334	0.961078	0.00299401	0.0329341	0.00299401	0.961078	304	1.1844	1.1032	1.2656	0.9516
305	317	0	12	7	336	0.943452	0	0.0357143	0.0208333	0.943452	305	1.1154	1.0272	1.2037	0.9573
306	298	0	2	36	336	0.886905	0	0.00595238	0.107143	0.886905	306	0.9942	0.9113	1.0771	0.9573
307	5	9	1	323	338	0.0147929	0.0266272	0.00295858	0.955621	0.955621	307	1.1525	1.0651	1.24	0.963
308	331	2	6	1	340	0.973529	0.00588235	0.0176471	0.00294118	0.973529	308	1.2251	1.1469	1.3032	0.9687
309	338	0	2	1	341	0.991202	0	0.0058651	0.00293255	0.991202	309	1.3078	1.2476	1.3681	0.9715
310	337	2	2	1	342	0.98538	0.00584795	0.00584795	0.00292398	0.98538	310	1.2763	1.2069	1.3458	0.9744
311	16	5	314	1	336	0.047619	0.014881	0.934524	0.00297619	0.934524	311	1.085	0.9937	1.1763	0.9573
312	26	39	0	272	337	0.0771513	0.115727	0	0.807122	0.807122	312	0.7554	0.6648	0.8461	0.9601
313	71	1	259	6	337	0.210682	0.00296736	0.768546	0.0178042	0.768546	313	0.7579	0.6773	0.8385	0.9601
314	3	307	5	22	337	0.00890208	0.910979	0.0148368	0.0652819	0.910979	314	1.008	0.9119	1.1042	0.9601
315	3	5	0	328	336	0.00892857	0.014881	0	0.97619	0.97619	315	1.2385	1.1633	1.3138	0.9573
316	13	3	313	6	335	0.038806	0.00895522	0.934328	0.0179104	0.934328	316	1.0709	0.975	1.1668	0.9544
317	4	188	1	140	333	0.012012	0.564565	0.003003	0.42042	0.564565	317	0.6204	0.5647	0.6762	0.9487
318	43	31	4	255	333	0.129129	0.0930931	0.012012	0.765766	0.765766	318	0.6388	0.5435	0.7341	0.9487
319	1	28	0	302	331	0.00302115	0.0845921	0	0.912387	0.912387	319	1.0585	0.9767	1.1403	0.943
320	17	118	172	9	316	0.0537975	0.373418	0.544304	0.028481	0.544304	320	0.4269	0.3525	0.5012	0.9003
321	190	50	2	72	314	0.605096	0.159236	0.00636943	0.229299	0.605096	321	0.4167	0.3458	0.4877	0.8946
322	2	2	0	311	315	0.00634921	0.00634921	0	0.987302	0.987302	322	1.2866	1.2182	1.355	0.8974
323	3	229	5	77	314	0.00955414	0.729299	0.0159236	0.245223	0.729299	323	0.6935	0.6108	0.7763	0.8946
324	324	1	2	3	330	0.981818	0.0030303	0.00606061	0.00909091	0.981818	324	1.2589	1.1847	1.3332	0.9402
325	326	2	3	0	331	0.984894	0.0060423	0.00906344	0	0.984894	325	1.2765	1.2076	1.3455	0.943
326	12	1	319	1	333	0.036036	0.003003	0.957958	0.003003	0.957958	326	1.1741	1.0921	1.2562	0.9487
327	330	1	2	1	334	0.988024	0.00299401	0.00598802	0.00299401	0.988024	327	1.2893	1.2224	1.3563	0.9516
328	323	2	4	3	332	0.972892	0.0060241	0.0120482	0.00903614	0.972892	328	1.2172	1.1353	1.2991	0.9459
329	18	2	307	4	331	0.0543807	0.0060423	0.927492	0.0120846	0.927492	329	1.0616	0.9678	1.1554	0.943
330	2	131	3	193	329	0.00607903	0.398176	0.00911854	0.586626	0.586626	330	0.6251	0.566	0.6842	0.9373
331	2	311	1	15	329	0.00607903	0.945289	0.00303951	0.0455927	0.945289	331	1.1287	1.0416	1.2158	0.9373
332	3	5	4	318	330	0.00909091	0.0151515	0.0121212	0.963636	0.963636	332	1.1766	1.0885	1.2647	0.9402
333	5	312	2	8	327	0.0152905	0.954128	0.00611621	0.0244648	0.954128	333	1.1419	1.0505	1.2332	0.9316
334	4	182	4	140	330	0.0121212	0.551515	0.0121212	0.424242	0.551515	334	0.5813	0.5186	0.6439	0.9402
335	65	3	249	15	332	0.195783	0.00903614	0.75	0.0451807	0.75	335	0.6631	0.5738	0.7523	0.9459
336	1	262	5	63	331	0.00302115	0.791541	0.0151057	0.190332	0.791541	336	0.795	0.7117	0.8782	0.943
337	1	18	2	312	333	0.003003	0.0540541	0.00600601	0.936937	0.936937	337	1.1049	1.0176	1.1922	0.9487
338	1	2	2	327	332	0.00301205	0.0060241	0.0060241	0.98494	0.98494	338	1.2736	1.2025	1.3447	0.9459
339	10	4	314	4	332	0.0301205	0.0120482	0.945783	0.0120482	0.945783	339	1.1092	1.015	1.2033	0.9459
340	119	2	208	3	332	0.358434	0.0060241	0.626506	0.00903614	0.626506	340	0.6443	0.582	0.7066	0.9459
341	33	3	291	3	330	0.1	0.00909091	0.881818	0.00909091	0.881818	341	0.949	0.8552	1.0429	0.9402
342	3	7	0	320	330	0.00909091	0.0212121	0	0.969697	0.969697	342	1.2129	1.1337	1.2921	0.9402
343	1	2	0	329	332	0.00301205	0.0060241	0	0.990964	0.990964	343	1.3061	1.2446	1.3676	0.9459
344	202	4	55	70	331	0.610272	0.0120846	0.166163	0.21148	0.610272	344	0.4028	0.3299	0.4757	0.943
345	4	59	3	265	331	0.0120846	0.178248	0.00906344	0.800604	0.800604	345	0.7963	0.7088	0.8838	0.943
346	1	312	1	14	328	0.00304878	0.95122	0.00304878	0.0426829	0.95122	346	1.1526	1.0686	1.2366	0.9345
347	1	5	4	320	330	0.0030303	0.0151515	0.0121212	0.969697	0.969697	347	1.2059	1.123	1.2888	0.9402
348	33	1	291	4	329	0.100304	0.00303951	0.884498	0.0121581	0.884498	348	0.964	0.8726	1.0553	0.9373
349	322	1	7	2	332	0.96988	0.00301205	0.0210843	0.0060241	0.96988	349	1.2105	1.1297	1.2913	0.9459
350	4	8	0	319	331	0.0120846	0.0241692	0	0.963746	0.963746	350	1.189	1.1069	1.2712	0.943
351	2	4	0	326	332	0.0060241	0.0120482	0	0.981928	0.981928	351	1.2636	1.1924	1.3348	0.9459
352	263	1	66	1	331	0.794562	0.00302115	0.199396	0.00302115	0.794562	352	0.8349	0.7596	0.9101	0.943
353	10	2	318	1	331	0.0302115	0.0060423	0.960725	0.00302115	0.960725	353	1.1779	1.0939	1.2618	0.943
354	308	5	10	5	328	0.939024	0.0152439	0.0304878	0.0152439	0.939024	354	1.0816	0.9841	1.1791	0.9345
355	1	13	2	308	324	0.00308642	0.0401235	0.00617284	0.950617	0.950617	355	1.1444	1.0573	1.2315	0.9231
356	2	4	9	308	323	0.00619195	0.0123839	0.0278638	0.95356	0.95356	356	1.1413	1.0498	1.2328	0.9202
357	197	8	2	110	317	0.621451	0.0252366	0.00630915	0.347003	0.621451	357	0.5922	0.5218	0.6625	0.9031
358	39	19	1	258	317	0.123028	0.0599369	0.00315457	0.81388	0.81388	358	0.7657	0.669	0.8624	0.9031
359	307	7	7	2	323	0.950464	0.0216718	0.0216718	0.00619195	0.950464	359	1.127	1.0335	1.2205	0.9202
360	4	14	3	303	324	0.0123457	0.0432099	0.00925926	0.935185	0.935185	360	1.0779	0.9819	1.1739	0.9231
361	25	0	298	1	324	0.0771605	0	0.919753	0.00308642	0.919753	361	1.0756	0.9927	1.1584	0.9231
362	103	0	215	5	323	0.318885	0	0.665635	0.0154799	0.665635	362	0.6746	0.611	0.7383	0.9202
363	3	2	1	318	324	0.00925926	0.00617284	0.00308642	0.981481	0.981481	363	1.257	1.1817	1.3323	0.9231
364	252	3	11	58	324	0.777778	0.00925926	0.0339506	0.179012	0.777778	364	0.718	0.6256	0.8103	0.9231
365	1	10	0	314	325	0.00307692	0.0307692	0	0.966154	0.966154	365	1.2078	1.1303	1.2852	0.9259
366	3	306	2	13	324	0.00925926	0.944444	0.00617284	0.0401235	0.944444	366	1.1148	1.0228	1.2068	0.9231
367	2	4	2	315	323	0.00619195	0.0123839	0.00619195	0.975232	0.975232	367	1.2277	1.1466	1.3088	0.9202
368	0	312	4	6	322	0	0.968944	0.0124224	0.0186335	0.968944	368	1.2077	1.1264	1.2891	0.9174
369	317	2	2	1	322	0.984472	0.00621118	0.00621118	0.00310559	0.984472	369	1.2707	1.198	1.3435	0.9174
370	277	2	36	5	320	0.865625	0.00625	0.1125	0.015625	0.865625	370	0.9086	0.8131	1.0041	0.9117
371	60	2	252	4	318	0.188679	0.00628931	0.792453	0.0125786	0.792453	371	0.7911	0.7044	0.8778	0.906
372	1	3	1	314	319	0.0031348	0.00940439	0.0031348	0.984326	0.984326	372	1.2711	1.1986	1.3436	0.9088
373	7	1	0	311	319	0.0219436	0.0031348	0	0.974922	0.974922	373	1.2383	1.1632	1.3133	0.9088
374	4	112	1	201	318	0.0125786	0.352201	0.00314465	0.632075	0.632075	374	0.6469	0.5834	0.7104	0.906
375	251	3	9	54	317	0.791798	0.00946372	0.0283912	0.170347	0.791798	375	0.7474	0.6533	0.8415	0.9031
376	238	15	55	7	315	0.755556	0.047619	0.174603	0.0222222	0.755556	376	0.6357	0.5382	0.7331	0.8974
377	17	55	223	17	312	0.0544872	0.176282	0.714744	0.0544872	0.714744	377	0.5209	0.4236	0.6182	0.8889
378	3	63	3	246	315	0.00952381	0.2	0.00952381	0.780952	0.780952	378	0.7737	0.6876	0.8598	0.8974
379	308	0	1	6	315	0.977778	0	0.0031746	0.0190476	0.977778	379	1.2487	1.1745	1.3229	0.8974
380	303	2	2	6	313	0.968051	0.00638978	0.00638978	0.0191693	0.968051	380	1.1981	1.1118	1.2844	0.8917
381	13	1	297	3	314	0.0414013	0.00318471	0.94586	0.00955414	0.94586	381	1.124	1.0328	1.2152	0.8946
382	16	1	287	9	313	0.0511182	0.00319489	0.916933	0.028754	0.916933	382	1.0219	0.9229	1.1209	0.8917
383	23	3	275	6	307	0.0749186	0.00977199	0.895765	0.019544	0.895765	383	0.9608	0.8583	1.0633	0.8746
384	176	123	3	6	308	0.571429	0.399351	0.00974026	0.0194805	0.571429	384	0.572	0.5042	0.6398	0.8775
385	1	287	0	15	303	0.00330033	0.947195	0	0.049505	0.947195	385	1.1468	1.0624	1.2313	0.8632
386	15	0	284	5	304	0.0493421	0	0.934211	0.0164474	0.934211	386	1.0891	0.996	1.1822	0.8661
387	6	3	206	87	302	0.0198675	0.00993377	0.682119	0.288079	0.682119	387	0.6363	0.5564	0.7162	0.8604
388	21	5	271	3	300	0.07	0.0166667	0.903333	0.01	0.903333	388	0.9827	0.8797	1.0857	0.8547
389	290	1	4	1	296	0.97973	0.00337838	0.0135135	0.00337838	0.97973	389	1.2495	1.1702	1.3287	0.8433
390	2	243	0	35	280	0.00714286	0.867857	0	0.125	0.867857	390	0.9502	0.8596	1.0409	0.7977
391	6	261	1	11	279	0.0215054	0.935484	0.00358423	0.0394265	0.935484	391	1.0786	0.9763	1.1808	0.7949
392	0	0	0	252	252	0	0	0	1	1	392	1.3479	1.2959	1.4	0.7179
# End LogoData											# End LogoData
