# Supplementary material for: Snake venom gene expression is coordinated by novel regulatory architecture and the integration of multiple co-opted vertebrate pathways
Source: HighWire-hosted journal article supplement (doi:10.1101/gr.276251.121), 2022-06-01
Supplement: Supplemental_Code.zip [file SVMP_vPERBlastHits_08.30.21.pdf › venomRegulation_2021-master/analysis/8_NVP_Analyses/enhancers/_fig_pieces/SVMP_vPERBlastHits_08.30.21.pdf]

a) SVMP

Tandem Array with Gene Expression at 1DPE

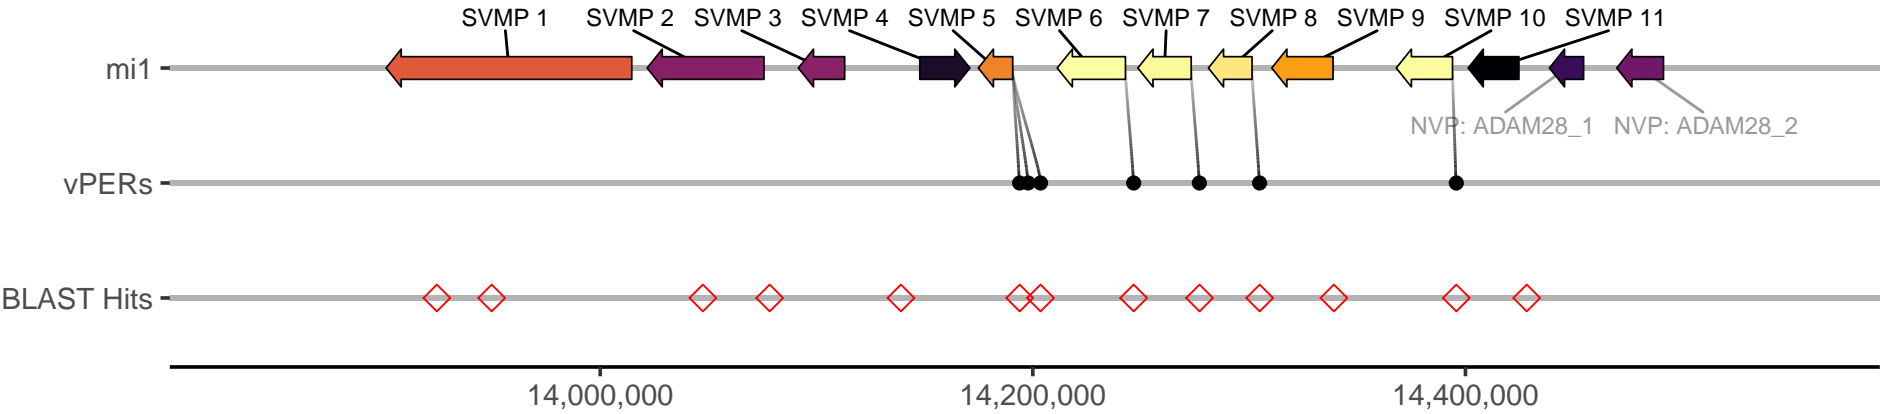

Chip-seq (H3K27ac)

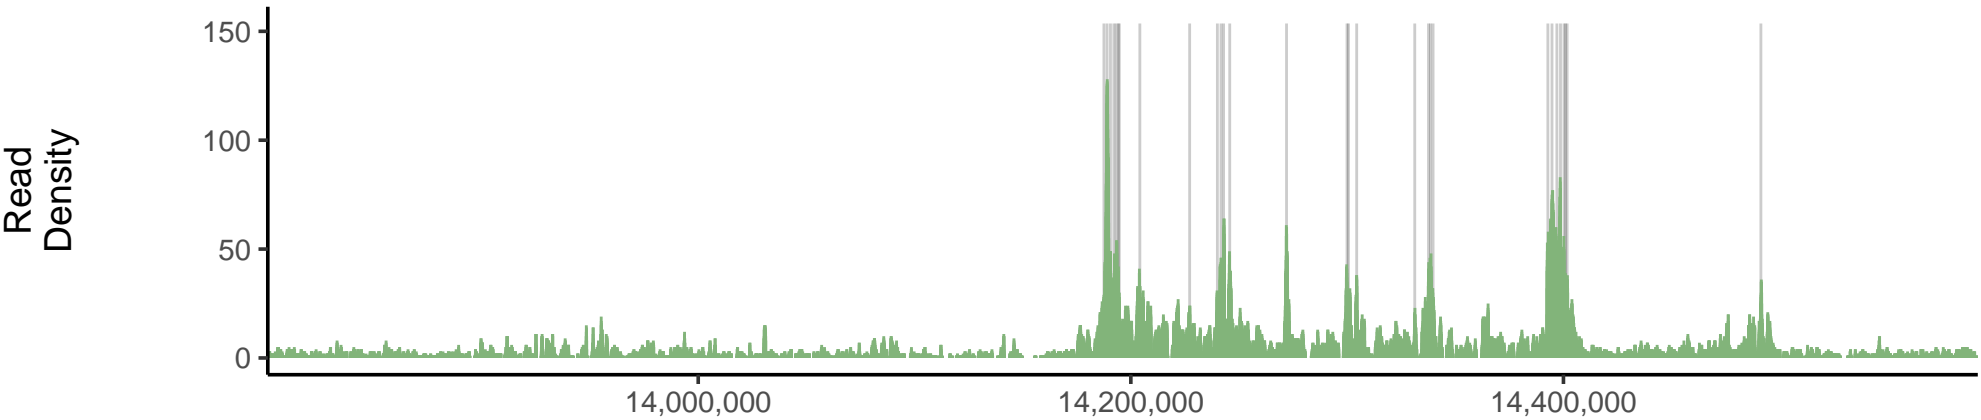

ATAC-seq (Post-Extraction Venom Gland)

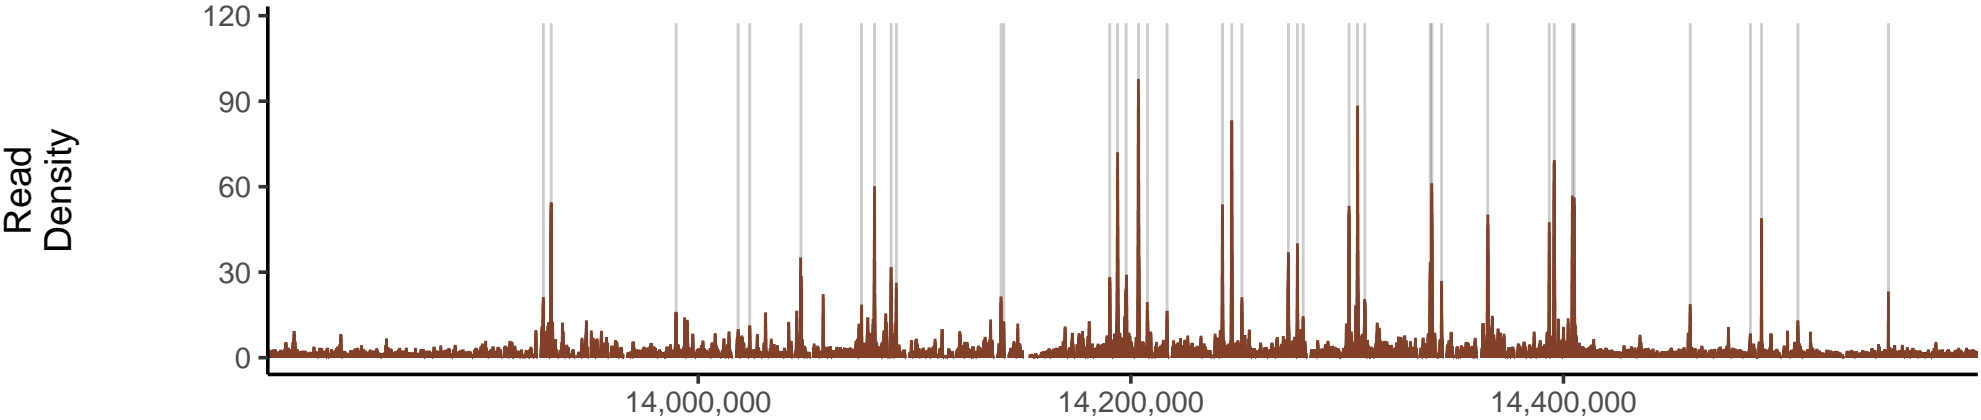

790.55 kb
