# Supplementary material for: Snake venom gene expression is coordinated by novel regulatory architecture and the integration of multiple co-opted vertebrate pathways
Source: HighWire-hosted journal article supplement (doi:10.1101/gr.276251.121), 2022-06-01
Supplement: Supplemental_Code.zip [file SVSP_vPERBlastHits_08.30.21.pdf › venomRegulation_2021-master/analysis/8_NVP_Analyses/enhancers/_fig_pieces/SVSP_vPERBlastHits_08.30.21.pdf]

**b) SVSP**

**Tandem Array with Gene Expression at 1DPE**

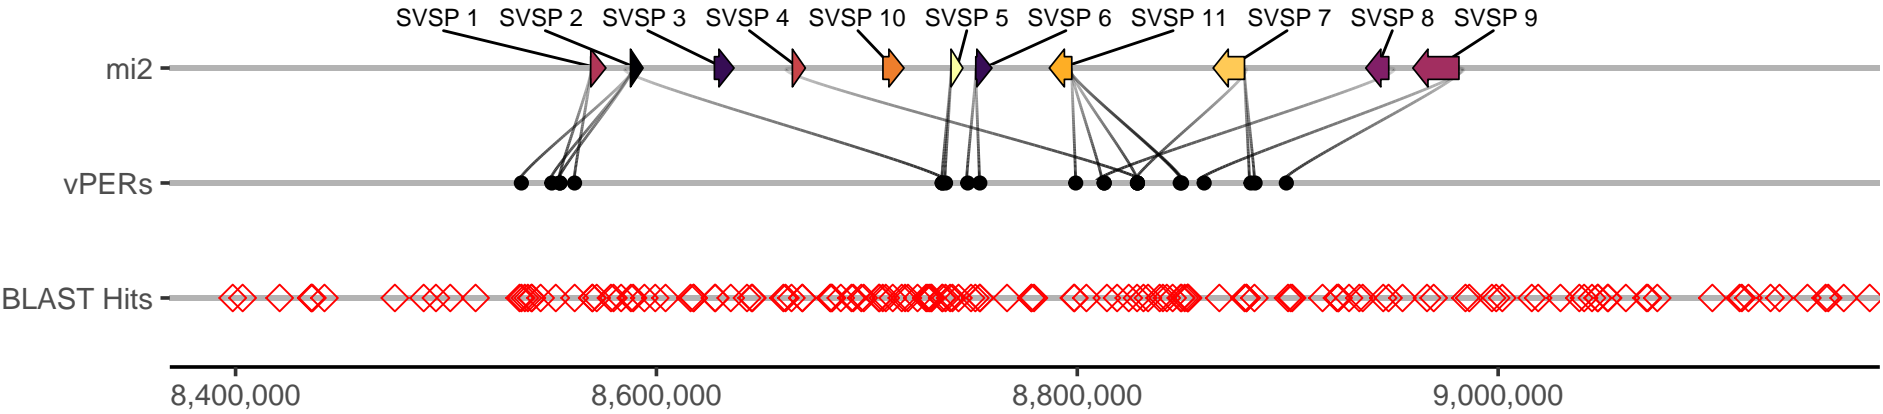

**Chip-seq (H3K27ac) – Super-Enhancers Shown in Yellow**

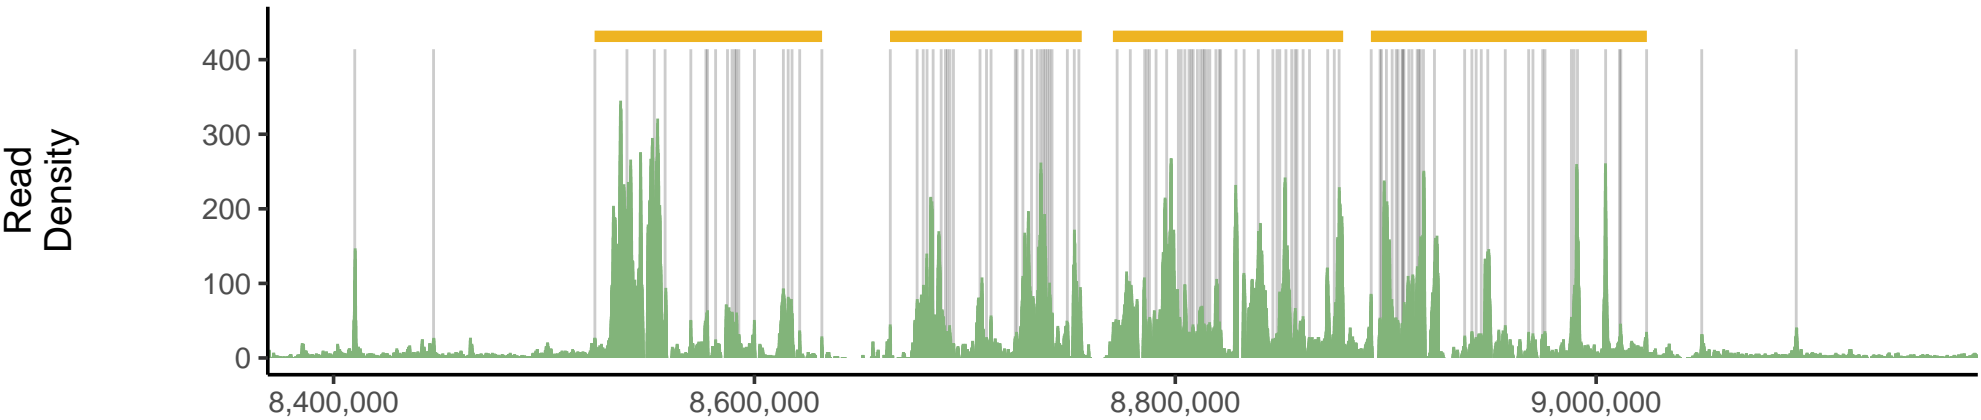

**ATAC-seq (Post-Extraction Venom Gland)**

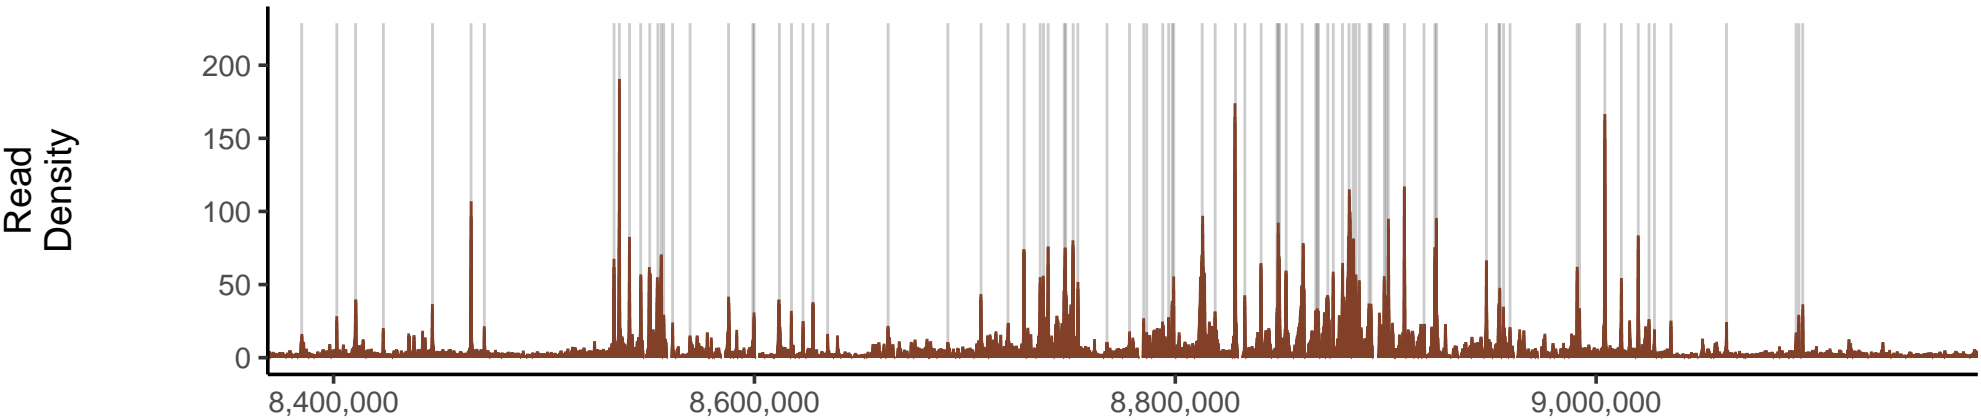

812.64 kb
