# Supplementary material for: Snake venom gene expression is coordinated by novel regulatory architecture and the integration of multiple co-opted vertebrate pathways
Source: HighWire-hosted journal article supplement (doi:10.1101/gr.276251.121), 2022-06-01
Supplement: Supplemental_Table_S2.xlsx [file Supplemental_Table_S2.xlsx]

## Sheet: CandTFInfo_forSupp_08.31.21
Supplemental Table S2. Candidate transcription factors (TFs) for potential roles in venom regulation. Candidate approach from which a candidate TF was identified is shown, as well as normalized gene expression counts across all samples, membership of TFs in relevant functional groups (i.e., interactions with ERK, previously implicated in venom regulation), and differential expression analysis res…
		Candidate Approach		Normalized Counts (TPM)									Transcription Factor Type			Relevant Functional Characteristics					Differential Expression Analysis Results
Transcription Factor Symbol	Transcript ID	SE-Associated (ChIP-seq)	Upregulated in Venom Gland (RNA-seq)	Venom Gland (RVG_1)	Venom Gland (RVG_11)	Venom Gland (RVG_4)	Liver (Lvr_11)	Liver (Lvr_4)	Pancreas (Panc_1)	Pancreas (Pnc_11)	Pancrease (Pnc_4)	Stomach (Stom_1)	DNA Binding	Protein Binding	Coregulator	Previously implicated in venom regulation	Interacts with ERK	Adrenoceptor Signaling Pathway	Unfolded Protein Response Pathway	AP-1 Complex Member	Non-Venom vs. Venom - Log2FoldChange	Non-Venom vs. Venom - p-value	Non-Venom vs. Venom - IHW p-value
SIRT1	crovir-transcript-10232	-	✓	8.11922	8.93243	8.8455	7.78899	7.52383	8.00674	7.99745	7.50378	7.21671	✓	-	✓	-	-	-	-	-	1.01075	0.00223493	0.00835664
RERE	crovir-transcript-1029	✓	-	5.94041	5.74575	6.01775	5.54196	5.29044	6.73232	6.3979	5.79805	7.14757	✓	-	✓	-	-	-	-	-	-0.308761	0.536037	0.637278
NOC2L	crovir-transcript-1030	-	✓	7.03289	8.3875	7.99658	5.48079	6.5753	6.8497	6.3979	6.40205	7.0126	-	-	✓	-	-	-	-	-	1.62224	0.00220537	0.0081719
IKZF5	crovir-transcript-10426	✓	✓	8.24816	7.98004	8.12935	6.09894	6.62767	6.27422	6.1877	6.48156	6.68823	✓	-	-	-	-	-	-	-	1.92548	1.2345e-11	4.83616e-10
SUFU	crovir-transcript-10545	✓	-	4.8867	4.39045	4.38179	3.93346	3.58259	3.77581	3.89217	3.12832	4.61169	-	-	✓	-	-	-	-	-	1.79192	0.0554029	0.0956327
PPRC1	crovir-transcript-10564	-	✓	9.71134	9.55545	9.62502	6.26774	7.71036	5.53247	6.48212	6.45555	6.55806	-	-	✓	-	-	-	-	-	3.26879	1.09179e-09	2.41046e-08
HES6	crovir-transcript-10728	✓	✓	6.6315	4.93271	7.71187	3.12832	4.21946	3.12832	4.19665	3.12832	3.98205	✓	-	✓	-	-	-	-	-	5.37074	1.05932e-05	8.03545e-05
PIAS2	crovir-transcript-10952	-	✓	6.25424	6.07819	5.61329	4.68322	5.10867	5.47329	4.83875	4.45303	5.89993	-	-	✓	-	-	-	-	-	1.35278	0.00451807	0.0147788
BMPR1A	crovir-transcript-10972	-	✓	5.73653	6.26257	5.9525	5.12345	4.89634	4.6554	5.03185	4.86241	5.22949	✓	-	-	-	-	-	-	-	1.49456	0.000358386	0.00178271
TP73	crovir-transcript-1100	-	✓	6.0447	6.17341	5.75534	3.12832	3.12832	3.12832	4.19665	3.12832	3.12832	✓	-	-	-	-	-	-	-	6.18375	3.78125e-05	0.000226426
RORA	crovir-transcript-11061	-	✓	4.69034	5.53302	4.54524	3.12832	4.02606	4.03664	3.12832	3.98331	4.69393	✓	-	-	-	-	-	-	-	2.74402	0.0187619	0.047565
KLF13	crovir-transcript-11070	✓	-	5.53374	7.87626	6.01775	6.55457	4.74857	4.6554	4.51956	5.16642	6.78275	✓	-	-	-	-	-	-	-	1.43545	0.148851	0.241372
TSC22D4	crovir-transcript-11156	✓	-	5.99353	6.77456	7.0227	6.07886	8.06653	6.6044	6.41943	5.83945	6.43612	✓	-	-	-	-	-	-	-	-0.210919	0.742643	0.81163
ZNF592	crovir-transcript-11170	✓	-	7.73116	7.51578	8.21038	6.2137	6.42043	7.7783	5.78104	7.19586	8.36623	✓	-	-	-	-	-	-	-	1.03954	0.067841	0.131587
CAMTA1	crovir-transcript-1130	-	✓	6.2757	5.96077	6.27865	4.62246	3.90884	4.86782	3.89217	3.73725	5.58652	✓	-	-	-	-	-	-	-	2.93574	0.000103308	0.00062654
PRDM2	crovir-transcript-11363	✓	-	5.25032	5.17447	4.73087	4.68322	4.89634	4.23213	4.42297	3.73725	4.84269	✓	-	-	-	-	-	-	-	0.955946	0.166182	0.265678
AEBP2	crovir-transcript-11366	✓	-	8.50754	8.79598	9.11606	8.10469	8.55337	8.29723	7.90218	8.73741	7.94277	✓	-	✓	-	-	-	-	-	0.556076	0.0696548	0.135008
TLE1	crovir-transcript-11392	✓	-	6.31766	6.46883	6.60749	5.76223	6.32821	5.53247	5.47991	6.40205	6.99121	-	-	✓	-	-	-	-	-	0.371786	0.48539	0.593017
ZNF710	crovir-transcript-11397	✓	-	7.00768	6.71308	7.09895	6.09894	5.9884	6.65696	5.60081	6.25869	6.92505	✓	-	-	-	-	-	-	-	0.840225	0.0203083	0.0507035
FOXC2	crovir-transcript-11432	-	✓	8.20461	6.75726	7.79194	3.12832	3.12832	3.12832	3.12832	3.73725	3.12832	✓	-	-	✓	-	-	-	-	9.34095	5.22931e-18	4.63622e-16
CTCF	crovir-transcript-11549	-	✓	8.17106	8.22497	8.21721	6.52543	6.507	7.44846	6.69083	6.84357	7.15399	✓	-	✓	✓	-	-	-	-	1.50015	1.88119e-07	2.61408e-06
ZBED4	crovir-transcript-11707	-	✓	8.00959	9.51127	8.68721	6.52543	5.61912	5.97361	6.44064	6.19699	6.11575	✓	-	-	-	-	-	-	-	2.93829	4.49451e-12	1.72573e-10
ZNF800	crovir-transcript-11733	-	✓	6.43654	7.01161	7.2335	5.16394	6.17746	6.46379	5.9403	5.29484	6.25519	✓	-	-	-	-	-	-	-	1.27257	0.0135546	0.035795
SREBF2	crovir-transcript-12065	-	✓	10.2093	11.3126	9.68167	5.86034	6.42043	7.24141	6.9484	6.6049	8.17159	✓	-	-	✓	-	-	-	-	3.93561	4.32708e-11	1.60371e-09
ATF4	crovir-transcript-12088	✓	-	12.4045	12.2032	11.8122	11.8497	11.7525	11.9068	11.9464	11.9783	11.3623	✓	✓	-	-	✓	✓	✓	-	0.349892	0.184196	0.286882
SOX10	crovir-transcript-12111	-	✓	7.19794	7.08263	6.89156	4.48993	3.76815	4.86782	4.31637	4.45303	4.4756	✓	-	✓	-	-	-	-	-	4.00578	4.1487e-15	2.31509e-13
TDG	crovir-transcript-12187	-	✓	7.08202	7.99846	7.92738	6.73068	6.54837	6.2049	6.13639	5.75536	5.85242	-	-	✓	-	-	-	-	-	1.66335	7.96853e-06	6.95687e-05
CREB3L2	crovir-transcript-12236	✓	✓	10.6504	11.1742	11.5583	5.41667	6.71492	8.21258	7.51306	7.16428	7.67057	✓	-	-	✓	✓	✓	✓	-	4.16408	2.09251e-11	6.64505e-10
CREB3	crovir-transcript-12236	✓	✓	10.6504	11.1742	11.5583	5.41667	6.71492	8.21258	7.51306	7.16428	7.67057	✓	-	-	-	✓	✓	✓	-	4.16408	2.09251e-11	6.64505e-10
OVOL1	crovir-transcript-12399	✓	-	5.53374	5.05939	4.68724	3.12832	3.12832	4.39329	4.0586	5.02366	4.19927	✓	-	-	-	-	-	-	-	1.82104	0.146429	0.20605
FOSB	crovir-transcript-1248	✓	✓	8.3466	9.67925	8.20351	7.93912	7.26897	3.12832	5.19903	6.34644	3.67294	✓	-	-	-	-	-	-	-	4.60417	5.41616e-05	0.000425025
GATAD2B	crovir-transcript-12558	-	✓	6.51058	6.62991	6.8568	4.74092	5.38844	4.86782	4.76686	4.94568	5.86844	✓	-	-	-	-	-	-	-	2.09339	6.80026e-05	0.000439468
PPP1R13L	crovir-transcript-1260	✓	✓	10.4635	10.6418	10.5027	5.71042	5.81613	8.05617	7.67268	7.82928	7.01966	-	-	✓	-	-	-	-	-	3.44681	2.41049e-07	3.90968e-06
RORC	crovir-transcript-12617	-	✓	6.49243	5.51191	6.81212	3.93346	3.58259	3.12832	5.03185	3.12832	3.67294	✓	-	-	-	-	-	-	-	4.57414	0.00018515	0.000875189
ARNT	crovir-transcript-12636	✓	-	7.78394	7.96887	7.84589	9.1209	9.65753	8.48214	7.78381	7.98163	8.03246	✓	-	✓	-	-	-	-	-	-0.828987	0.105934	0.175411
AEBP1	crovir-transcript-12782	-	✓	7.34592	6.27485	6.90862	5.54196	5.35658	5.47329	6.02774	5.3546	6.86355	✓	-	✓	-	-	-	-	-	1.27427	0.011413	0.0310781
ARHGAP35	crovir-transcript-1287	-	✓	7.48005	7.57596	7.45246	6.44983	5.72118	7.01946	5.8144	5.7113	7.37349	✓	-	✓	-	-	-	-	-	1.38646	0.00197995	0.00762633
PURA	crovir-transcript-12918	✓	✓	6.56367	6.40337	5.56981	4.84842	4.57927	5.20594	4.69027	3.12832	6.06139	✓	-	-	-	-	-	-	-	2.05383	0.00647779	0.0180758
PURB	crovir-transcript-12918	✓	✓	6.56367	6.40337	5.56981	4.84842	4.57927	5.20594	4.69027	3.12832	6.06139	✓	-	-	-	-	-	-	-	2.05383	0.00647779	0.0180758
KAT6A	crovir-transcript-12928	✓	✓	9.31068	9.82144	9.89155	7.21267	7.06666	8.44552	7.62755	7.72516	8.72783	-	-	✓	-	-	-	-	-	2.03599	2.59441e-06	2.59053e-05
BARX2	crovir-transcript-12963	-	✓	7.43357	7.6983	7.51491	3.12832	4.12817	3.12832	3.12832	3.12832	4.13285	✓	-	-	-	-	-	-	-	6.74352	1.89023e-10	5.37174e-09
MXD1	crovir-transcript-12992	✓	✓	6.72754	8.7619	8.3287	3.12832	5.25608	5.84173	5.63882	5.29484	7.03367	✓	-	✓	-	-	-	-	-	3.31255	0.00186668	0.00723909
FIGLA	crovir-transcript-12994	✓	-	4.94559	3.68044	5.63451	3.12832	3.12832	5.3464	4.9708	3.12832	4.56818	✓	-	-	-	-	-	-	-	1.49941	0.383201	0.507622
BOLA3	crovir-transcript-13007	-	✓	7.82769	7.88024	7.14282	6.67878	6.66572	6.63092	6.82543	6.6049	5.81982	✓	-	-	-	-	-	-	-	1.26414	0.00116738	0.00492569
ATF6B	crovir-transcript-13131	-	✓	7.31547	6.81691	7.2062	4.62246	4.94182	5.3464	4.31637	4.86241	5.64402	✓	-	-	-	✓	✓	✓	-	2.9374	6.51341e-11	1.88173e-09
WNT5A	crovir-transcript-13528	-	✓	7.06989	7.28875	7.2062	3.12832	3.12832	4.03664	3.67156	3.12832	8.01144	✓	-	-	-	-	-	-	-	7.26299	9.40542e-06	7.98444e-05
CREBRF	crovir-transcript-13972	✓	-	5.88517	6.3464	5.67599	4.68322	4.89634	5.8871	6.11001	5.7113	5.96084	✓	-	-	-	-	-	-	-	0.543294	0.366895	0.445948
FOXI1	crovir-transcript-14004	-	✓	6.98201	6.67671	6.95042	3.12832	3.12832	3.12832	3.12832	3.12832	3.7934	✓	-	-	-	-	-	-	-	7.87461	2.98859e-14	1.30125e-12
ZNF750	crovir-transcript-14133	-	✓	9.4708	7.72511	9.03912	3.12832	3.12832	3.12832	3.12832	4.32098	3.12832	✓	-	-	-	-	-	-	-	9.29345	3.89286e-10	9.37755e-09
SOX9	crovir-transcript-14372	✓	-	9.5359	10.0635	10.1027	6.2137	5.67111	9.06332	9.7256	8.66054	8.77844	✓	-	-	-	-	-	-	-	1.3784	0.118638	0.204809
BUD31	crovir-transcript-144	✓	-	9.34616	8.80437	8.23078	8.30513	8.50557	9.10146	8.8733	9.19606	7.97571	✓	-	✓	-	-	-	-	-	0.115291	0.789773	0.846186
NR4A1	crovir-transcript-14451	✓	-	12.3646	14.0368	12.4879	13.1876	10.5063	7.60299	10.065	8.01732	7.0613	✓	-	-	-	✓	-	-	-	3.19339	NA	NA
DDIT3	crovir-transcript-14617	✓	-	8.95122	9.45108	10.3511	10.0996	8.56675	7.89161	8.20201	9.4682	6.73197	✓	-	✓	✓	-	-	✓	✓	1.03473	0.0727767	0.138806
ZNF740	crovir-transcript-14639	-	✓	5.88517	6.04975	6.35584	4.74092	5.32393	5.41136	5.14571	5.09705	5.68103	✓	-	-	-	-	-	-	-	1.24947	0.00487816	0.0143453
CSRNP2	crovir-transcript-14714	✓	-	7.27383	7.49515	7.12105	6.79301	8.08989	6.6044	7.07517	7.0129	6.93255	✓	-	-	-	-	-	-	-	0.176039	0.685779	0.826131
POU6F1	crovir-transcript-14715	-	✓	6.83196	6.65817	6.09524	4.99355	5.41955	5.53247	5.34696	5.23223	5.83622	✓	-	-	-	-	-	-	-	1.52708	3.29484e-05	0.00023881
MBD1	crovir-transcript-14772	✓	✓	9.66593	9.60553	10.0074	7.73314	7.52383	7.62938	7.31077	7.51633	8.15252	✓	-	-	-	-	-	-	-	2.21549	1.05892e-14	5.53815e-13
KDM5C	crovir-transcript-14830	-	✓	9.22069	9.37141	9.66927	8.29231	8.37862	8.20383	8.46036	7.75719	8.93536	✓	-	-	-	-	-	-	-	1.10726	0.00103112	0.00445482
HCFC1	crovir-transcript-14873	✓	-	9.67194	9.84401	10.0434	8.65792	9.64656	9.19704	9.11448	8.8943	9.57721	✓	-	✓	-	-	-	-	-	0.66087	0.0454856	0.11527
SMARCA2	crovir-transcript-14989	-	✓	5.56972	5.65316	5.35458	4.33843	3.90884	3.77581	4.51956	4.45303	4.19927	-	-	✓	-	-	-	-	-	2.5062	2.89233e-05	0.000180131
SMARCA4	crovir-transcript-14989	-	✓	5.56972	5.65316	5.35458	4.33843	3.90884	3.77581	4.51956	4.45303	4.19927	-	-	✓	-	-	-	-	-	2.5062	2.89233e-05	0.000180131
CARM1	crovir-transcript-14997	-	✓	7.00768	7.3647	6.83909	4.94706	5.47967	5.27806	4.69027	5.41176	6.32579	-	-	✓	-	-	-	-	-	2.18651	5.57418e-05	0.000399914
NFIX	crovir-transcript-15019	-	✓	4.36044	5.49046	4.81352	3.12832	3.12832	3.12832	3.12832	3.12832	4.19927	✓	-	-	✓	-	-	-	-	5.55059	0.00222677	0.00710966
ZBTB6	crovir-transcript-1506	✓	✓	5.67224	5.70947	6.42903	4.33843	5.14714	5.3464	3.89217	4.67608	5.17716	✓	-	-	-	-	-	-	-	1.86398	0.00728427	0.0217462
SP1	crovir-transcript-15064	✓	-	7.15269	8.12122	7.96849	6.1575	6.507	6.40338	6.44064	6.3178	8.58109	✓	-	-	-	✓	-	-	-	1.22215	0.0674087	0.152097
ZBTB26	crovir-transcript-1507	✓	-	6.18782	6.1602	6.77535	5.73657	5.74554	5.58916	5.74685	5.41176	5.62512	✓	-	-	-	-	-	-	-	0.981706	0.00447749	0.0146579
ZNF462	crovir-transcript-15288	✓	✓	8.91791	8.78965	8.13658	6.11873	6.35963	6.97887	7.22841	6.8634	6.97677	✓	-	-	-	-	-	-	-	2.01896	2.27779e-07	3.06759e-06
MLLT3	crovir-transcript-15356	-	✓	8.59445	7.41502	7.52598	5.08162	4.45005	4.39329	5.19903	4.32098	7.115	✓	-	-	-	-	-	-	-	3.22834	4.22827e-05	0.000292871
NFIB	crovir-transcript-15370	✓	-	6.18782	5.49046	4.73087	4.68322	4.21946	3.12832	3.12832	3.12832	4.31926	✓	-	✓	✓	-	-	-	-	2.9295	0.0246382	0.0590474
GTF2H2	crovir-transcript-15686	-	✓	7.25256	6.78313	6.39291	5.62881	6.62767	5.27806	4.90657	6.06478	5.12262	✓	-	-	-	-	-	-	-	1.49465	0.0176912	0.0447801
JMY	crovir-transcript-15731	-	✓	4.8867	5.53302	4.54524	3.12832	4.12817	4.03664	3.89217	3.73725	4.80723	-	-	✓	-	-	-	-	-	2.48131	0.0152184	0.0396938
CDK7	crovir-transcript-15748	-	✓	7.20903	6.56168	6.78463	5.57154	5.90495	5.12954	5.84697	6.22818	5.91541	-	-	✓	-	-	-	-	-	1.33097	0.00163115	0.00650104
SREBF1	crovir-transcript-1605	✓	✓	11.0359	11.6171	10.8489	9.62856	9.07937	8.48935	8.90386	9.16857	7.68392	✓	-	-	-	-	-	-	-	2.40584	5.60451e-10	1.64376e-08
MBNL3	crovir-transcript-16112	✓	✓	6.33818	7.60513	6.67902	4.48993	4.94182	5.27806	5.09006	5.16642	7.5198	✓	-	-	-	-	-	-	-	2.22206	0.00811653	0.0240338
FOXO4	crovir-transcript-16138	✓	-	7.88402	7.76441	8.11478	8.45062	8.82501	9.33149	8.32572	8.73205	9.74668	✓	✓	-	-	✓	-	-	-	-1.00818	0.00248856	0.00908797
FOXO3	crovir-transcript-16138	✓	-	7.88402	7.76441	8.11478	8.45062	8.82501	9.33149	8.32572	8.73205	9.74668	✓	✓	-	✓	✓	-	-	-	-1.00818	0.00248856	0.00908797
TSC22D3	crovir-transcript-16160	✓	-	7.46163	8.77478	8.47272	10.5095	10.371	9.6537	10.2518	9.86302	8.81527	✓	-	-	-	-	-	-	-	-1.76153	1.48164e-08	3.21231e-07
TERF2	crovir-transcript-16196	✓	-	8.84182	8.43963	8.93731	8.65792	8.56342	8.78727	9.45604	9.24952	7.6205	✓	-	-	-	-	-	-	-	-0.0208295	0.962085	0.932601
HIF3A	crovir-transcript-16294	✓	✓	5.60476	8.12122	6.21091	5.81216	5.06899	4.39329	4.42297	5.41176	5.52647	✓	-	✓	-	-	-	-	-	2.22678	0.00499262	0.0161941
LITAF	crovir-transcript-1631	✓	-	8.80949	7.92331	8.11844	5.16394	6.29608	13.1391	10.4729	11.1855	10.5011	✓	-	-	-	-	-	-	-	-2.43305	0.037238	0.0988224
XBP1	crovir-transcript-16464	✓	-	11.6096	11.4824	11.4157	9.80572	10.7996	10.8235	10.9167	11.1558	8.19041	✓	-	-	-	-	-	✓	-	1.01739	0.0920519	0.165262
TFAP4	crovir-transcript-1652	✓	-	7.18676	7.10326	6.99901	7.99294	7.83176	7.66808	8.47061	7.62453	6.84775	✓	-	-	-	-	-	-	-	-0.737918	0.0596457	0.117391
GLIS2	crovir-transcript-1669	✓	-	8.79856	8.11448	8.18271	8.08004	7.80377	8.81048	8.88483	8.44172	7.79885	✓	-	-	-	-	-	-	-	0.00542078	0.989408	0.949673
CSRNP1	crovir-transcript-1739	-	✓	5.73653	8.49515	7.0765	6.66551	4.98567	4.39329	4.90657	3.98331	5.25487	✓	-	-	-	-	-	-	-	2.47168	0.00766017	0.0228695
CREM	crovir-transcript-1813	✓	-	6.68033	7.3243	5.86636	9.02351	7.6737	5.69586	5.74685	5.23223	5.25487	✓	-	-	-	-	✓	-	-	-0.0365846	0.970447	0.979465
DNAJC1	crovir-transcript-1928	-	✓	8.68435	8.67072	8.67485	6.75594	6.54837	8.01676	8.31439	7.03054	6.54829	✓	-	-	-	-	-	-	-	1.3882	0.0160031	0.0487962
ZBTB33	crovir-transcript-209	-	✓	6.0447	6.65817	6.27865	5.2032	4.37897	5.41136	5.03185	4.86241	6.16808	✓	-	-	-	-	-	-	-	1.69443	0.00485341	0.0142939
NKRF	crovir-transcript-213	-	✓	7.09404	6.8499	7.41126	6.49567	5.793	6.57737	5.63882	5.87965	6.15518	✓	-	-	-	-	-	-	-	1.22779	0.00217657	0.00820522
SKI	crovir-transcript-2243	-	✓	8.25351	6.85803	6.58638	5.2783	5.88328	5.04826	5.47991	4.86241	6.50852	✓	-	✓	-	-	-	-	-	2.02511	0.000329722	0.00169442
RARA	crovir-transcript-2559	✓	-	5.33769	6.0922	5.38029	8.26196	6.89629	5.12954	5.19903	5.02366	5.52647	✓	-	✓	-	✓	-	-	-	-0.954815	0.28986	0.404885
NFE2L1	crovir-transcript-2627	-	✓	7.93157	8.70475	7.61676	6.93233	6.39036	6.49305	6.28502	6.06478	7.75735	✓	✓	✓	-	-	-	-	-	1.63297	0.00206523	0.0091171
SP6	crovir-transcript-2638	-	✓	6.33818	6.82523	6.30485	3.12832	3.12832	3.12832	3.12832	3.12832	3.89408	✓	-	-	-	-	-	-	-	7.44562	5.26553e-10	1.04279e-08
ZNF652	crovir-transcript-2640	-	✓	10.3767	10.4777	11.1247	8.4156	8.36337	8.45292	8.1327	8.21468	7.91285	✓	-	-	-	-	-	-	-	2.49754	7.18179e-19	9.5667e-17
DLX4	crovir-transcript-2658	-	✓	5.1071	6.28703	6.99102	3.12832	3.12832	3.12832	3.12832	3.12832	3.67294	✓	-	-	-	-	-	-	-	7.44708	9.00109e-09	1.65156e-07
BHLHA15	crovir-transcript-320	✓	✓	10.5311	11.8449	11.132	3.12832	3.12832	7.84735	7.57145	6.99505	7.93163	✓	-	-	-	-	-	✓	-	4.70259	0.0020109	0.00925011
CREG1	crovir-transcript-3779	-	✓	9.19868	8.27719	8.79616	7.35123	7.76945	7.88067	6.80928	7.30118	8.17159	-	-	✓	-	✓	-	-	-	1.27222	9.62889e-05	0.000591433
TAF13	crovir-transcript-3854	-	✓	9.0156	9.49581	8.85867	7.42367	7.46781	8.01676	7.43133	7.2866	7.84316	✓	-	✓	-	-	-	-	-	1.67379	1.18781e-08	2.14111e-07
BLZF1	crovir-transcript-3855	-	✓	8.72728	9.2675	9.67301	7.4315	7.41692	7.32462	7.64577	8.18361	6.50852	✓	-	-	-	✓	-	-	-	1.88779	8.83027e-08	1.32038e-06
MKL2	crovir-transcript-411	-	✓	5.29474	5.7811	4.85278	3.12832	4.12817	3.12832	3.67156	3.98331	5.27977	-	-	✓	-	-	-	-	-	2.86301	0.0235065	0.048667
PITX2	crovir-transcript-4420	✓	✓	9.43358	9.28409	8.98812	3.12832	3.12832	3.12832	3.12832	3.12832	3.12832	✓	✓	✓	-	-	-	-	-	11.4967	1.69577e-30	5.12665e-28
SMARCA5	crovir-transcript-4474	-	✓	6.68033	6.72202	6.49862	5.62881	6.5753	5.27806	5.71178	6.16509	5.22949	✓	-	-	-	-	-	-	-	1.10086	0.0171199	0.0433235
CLOCK	crovir-transcript-4727	-	✓	6.51058	6.76594	6.19696	5.2783	4.3025	4.03664	4.90657	3.12832	5.62512	✓	✓	-	-	-	-	-	-	2.4875	0.00902799	0.0262413
NFXL1	crovir-transcript-4728	✓	-	7.73882	6.92146	7.03828	7.48512	7.26074	7.71811	7.94694	7.49113	7.10176	✓	-	-	-	-	-	-	-	-0.306199	0.398501	0.522364
TAF2	crovir-transcript-4874	-	✓	7.57729	7.22747	8.34127	6.79301	6.54837	6.40338	6.1877	6.19699	6.44669	-	✓	-	-	-	-	-	-	1.52659	9.39859e-05	0.000571001
MED30	crovir-transcript-4885	✓	-	7.11779	6.73975	6.25194	5.68376	5.74554	5.64356	6.50242	6.34644	5.32819	-	-	✓	-	-	-	-	-	1.06859	0.0307826	0.0697078
TRPS1	crovir-transcript-4887	-	✓	6.43654	6.78313	5.65541	3.12832	3.12832	4.23213	3.12832	3.98331	4.31926	✓	-	-	-	-	-	-	-	5.55803	1.29196e-07	1.55649e-06
GRHL2	crovir-transcript-4926	✓	-	4.36044	4.33498	4.38179	3.12832	3.12832	4.6554	4.19665	5.09705	5.62512	✓	-	-	✓	-	-	-	-	-0.338145	0.802336	0.863853
MTDH	crovir-transcript-4948	-	✓	11.5281	11.778	11.7391	8.94658	9.97702	9.6601	9.30397	9.17253	9.32116	-	-	✓	-	-	-	-	-	2.27727	1.16266e-12	4.35195e-11
NCOA2	crovir-transcript-5046	-	✓	6.86044	7.58575	7.31878	5.44912	5.25608	5.47329	5.47991	4.67608	7.41684	✓	-	✓	✓	-	-	-	-	2.1044	0.00334217	0.0125025
PLAG1	crovir-transcript-5094	✓	-	3.12832	3.12832	3.12832	4.62246	3.12832	3.12832	4.19665	3.12832	3.7934	✓	-	-	-	-	-	-	-	-4.11476	0.169246	1
KCTD1	crovir-transcript-5151	-	✓	6.77323	6.87415	6.95042	4.15922	3.76815	3.12832	4.31637	3.12832	4.26117	-	-	✓	-	-	-	-	-	4.90776	1.91524e-11	6.10506e-10
NFATC1	crovir-transcript-5268	-	✓	6.9949	4.93271	5.88402	3.7885	3.90884	4.23213	4.60819	5.02366	4.65356	✓	-	-	-	-	-	-	-	2.60872	0.00168774	0.00663934
HIVEP1	crovir-transcript-5324	-	✓	8.72343	8.48995	8.17571	6.3863	6.86399	6.95814	6.59975	7.56543	7.69276	✓	-	-	-	-	-	-	-	1.518	0.000192637	0.00126384
TFAP2A	crovir-transcript-5334	✓	✓	8.49856	8.56846	8.29357	3.12832	3.12832	6.27422	5.03185	5.29484	3.51456	✓	-	✓	-	-	-	-	-	4.56888	0.00191457	0.00742299
RREB1	crovir-transcript-5349	✓	✓	6.68033	6.99698	7.48119	5.44912	5.59236	5.04826	5.14571	5.02366	7.3174	✓	-	-	-	-	-	-	-	1.83062	0.0116445	0.0322751
IRX2	crovir-transcript-5470	✓	✓	9.09522	8.30409	8.81205	3.12832	3.12832	3.12832	5.52143	3.12832	3.12832	✓	-	-	-	-	-	-	-	8.50447	0.00573169	0.018184
IRX1	crovir-transcript-5471	✓	✓	10.9154	9.14563	10.4908	3.12832	3.12832	3.12832	4.9708	5.09705	3.67294	✓	-	-	-	-	-	-	-	8.47991	4.51086e-09	8.82922e-08
HDAC1	crovir-transcript-5542	✓	✓	11.4241	8.93243	10.844	8.61054	8.88495	8.12264	8.3973	8.67736	7.99011	✓	-	✓	-	-	-	-	-	2.27574	3.82627e-05	0.000326775
HDAC3	crovir-transcript-5542	✓	✓	11.4241	8.93243	10.844	8.61054	8.88495	8.12264	8.3973	8.67736	7.99011	✓	-	✓	-	-	-	-	-	2.27574	3.82627e-05	0.000326775
ATF6	crovir-transcript-5645	-	✓	6.84627	7.9726	7.58007	4.41697	5.9884	5.47329	5.43705	5.79805	6.9023	✓	-	✓	✓	-	-	✓	-	2.15164	0.00279553	0.0098716
CDC73	crovir-transcript-5698	✓	✓	7.56872	6.9896	7.05369	5.2783	4.57927	7.80169	5.34696	5.83945	7.29434	-	✓	-	-	-	-	-	-	1.58979	0.00768267	0.02268
DR1	crovir-transcript-5765	-	✓	5.45875	6.25017	6.90011	5.03836	4.84908	4.53228	3.67156	4.77294	5.17716	✓	-	✓	-	-	-	-	-	2.27478	0.00240303	0.00800271
BCL10	crovir-transcript-5855	-	✓	5.63892	6.06405	5.9525	4.79589	5.02803	4.96134	4.69027	4.1682	4.80723	-	-	✓	-	-	-	-	-	1.76298	0.000212284	0.00116894
ZZZ3	crovir-transcript-5892	-	✓	7.6441	8.11785	8.19315	6.6521	7.11314	7.03933	6.96306	6.92132	7.32311	✓	-	-	-	-	-	-	-	1.09352	0.000283472	0.00160711
NFIA	crovir-transcript-5965	✓	✓	8.26945	8.40692	8.36915	5.48079	5.53719	5.20594	4.76686	4.94568	5.80322	✓	-	-	✓	-	-	-	-	3.62821	1.1276e-17	9.46017e-16
SPDEF	crovir-transcript-6220	✓	✓	9.3978	9.25683	8.89533	3.12832	4.12817	3.12832	3.12832	3.73725	8.99721	✓	-	-	✓	-	-	-	-	7.37524	2.06413e-05	0.000159645
PPARD	crovir-transcript-6233	-	✓	6.54619	6.92919	6.99901	4.5582	4.79989	4.86782	5.14571	5.41176	5.09444	✓	-	✓	-	-	-	-	-	2.51812	6.3666e-09	1.21407e-07
ELK4	crovir-transcript-6293	-	✓	5.94041	6.70407	6.42903	4.68322	5.29044	4.76642	4.83875	4.32098	5.76941	✓	-	✓	-	✓	-	-	-	1.99349	0.00146595	0.00536192
KDM5B	crovir-transcript-6418	✓	-	9.51155	9.38966	8.91016	8.51453	8.05708	8.47489	8.36471	8.60887	9.56285	✓	-	✓	-	-	-	-	-	0.671006	0.0580422	0.116104
ZNF341	crovir-transcript-6462	✓	-	6.56367	6.07819	6.44087	6.40245	6.10488	6.73232	6.28502	6.94011	6.19352	✓	-	-	-	-	-	-	-	-0.119416	0.749395	0.82435
NCOA3	crovir-transcript-6549	-	✓	8.86647	8.09407	9.11971	7.62815	6.92787	7.20673	7.71645	7.6129	7.29434	✓	-	✓	-	-	-	-	-	1.43118	0.000130424	0.000902205
ZNF217	crovir-transcript-6590	✓	✓	6.71198	6.62036	7.49815	3.12832	4.57927	5.27806	4.9708	4.86241	6.87138	✓	-	-	-	-	-	-	-	2.85165	0.00440517	0.0157936
UHRF1	crovir-transcript-6698	✓	-	5.33769	4.99767	5.45455	5.81216	4.45005	4.39329	4.19665	3.12832	5.35175	✓	-	-	-	-	-	-	-	0.693657	0.508199	0.624609
KLF11	crovir-transcript-6772	✓	✓	6.06959	7.41502	6.60749	4.62246	4.57927	4.39329	4.42297	3.98331	6.52855	✓	-	-	-	✓	-	-	-	3.06461	0.000693806	0.00285743
KLF16	crovir-transcript-6772	✓	✓	6.06959	7.41502	6.60749	4.62246	4.57927	4.39329	4.42297	3.98331	6.52855	✓	-	-	-	-	-	-	-	3.06461	0.000693806	0.00285743
GATAD2A	crovir-transcript-6778	-	✓	7.32569	7.56115	7.55328	5.08162	5.83888	6.49305	5.39277	5.61865	7.00551	✓	-	-	-	-	-	-	-	1.97557	7.69572e-05	0.000488024
JUN	crovir-transcript-6797	✓	-	8.64418	9.80794	9.58861	10.9234	8.87692	7.29192	7.73358	8.20697	6.90992	✓	✓	✓	✓	✓	-	-	✓	0.72701	0.335161	0.457012
ARID3A	crovir-transcript-6808	-	✓	4.94559	6.43648	5.52489	3.59716	3.76815	3.77581	3.67156	3.12832	6.27912	✓	-	-	-	-	-	-	-	4.41734	0.00104072	0.00443284
ZNF511	crovir-transcript-6877	✓	-	6.18782	5.976	6.58638	5.16394	5.50874	6.34028	6.37603	5.83945	5.83622	✓	-	-	-	-	-	-	-	0.504285	0.305678	0.386611
ERF	crovir-transcript-709	-	✓	7.75402	8.51319	8.60884	4.41697	6.35963	6.70764	6.50242	6.58107	6.67035	✓	-	✓	-	✓	-	-	-	2.24578	0.000818952	0.00394519
FOS	crovir-transcript-7192	✓	✓	9.91407	8.98138	9.42421	8.05497	9.16097	4.96134	5.56171	6.48156	4.42609	✓	✓	-	✓	✓	-	-	✓	3.38948	0.00143352	0.00581711
CIC	crovir-transcript-724	✓	✓	6.66424	7.04044	6.5757	4.15922	5.35658	5.04826	3.12832	5.09705	5.96084	✓	-	-	-	-	-	-	-	2.51234	0.00687206	0.0210789
ZNF410	crovir-transcript-7283	-	✓	9.45695	9.69626	9.43304	7.8191	7.96912	7.03933	7.31077	7.58936	6.55806	✓	-	-	-	-	-	-	-	2.27217	1.32883e-11	4.25399e-10
ZFP36L1	crovir-transcript-7440	✓	-	9.66994	9.51127	9.21151	12.4427	11.7565	8.95811	9.02	9.06163	9.95715	✓	-	-	-	-	-	-	-	-1.16891	0.167206	0.322284
CREB3L1	crovir-transcript-7444	-	✓	8.58174	9.34433	8.57733	5.08162	5.793	7.96593	7.22841	7.11558	8.15571	✓	-	-	-	✓	✓	✓	-	2.09724	0.0031071	0.0107594
NR1H3	crovir-transcript-7523	-	✓	9.00295	8.58317	9.14322	7.4158	7.35648	6.09404	6.54216	6.37452	5.69917	✓	-	✓	-	-	-	-	-	2.56461	1.54163e-07	2.58539e-06
CCND1	crovir-transcript-7537	-	✓	5.94041	6.28703	7.26028	4.41697	4.79989	4.03664	4.19665	4.94568	6.83979	-	-	✓	-	-	-	✓	-	2.44485	0.012327	0.0336581
EHF	crovir-transcript-7549	✓	✓	10.2065	9.72196	10.6545	3.12832	3.12832	6.09404	6.52243	6.3178	5.30421	✓	-	-	✓	-	-	-	-	5.07089	0.00024929	0.00133649
ELF5	crovir-transcript-7566	-	✓	10.583	9.9631	10.6695	4.05416	4.02606	7.5348	7.24047	6.74001	4.06091	✓	-	-	✓	-	-	-	-	4.37709	0.000261067	0.00130651
SSRP1	crovir-transcript-7902	-	✓	9.89879	10.0406	9.61342	8.78529	9.14769	8.40032	8.04625	8.5431	8.3607	✓	-	-	-	-	-	-	-	1.31972	7.35828e-05	0.000462496
KDM2A	crovir-transcript-7930	-	✓	7.94487	9.05884	8.08145	6.79301	6.90689	7.29192	7.60909	6.99505	8.0736	✓	-	-	-	-	-	-	-	1.24069	0.00965607	0.0272607
TFCP2L1	crovir-transcript-8096	✓	✓	9.47538	8.79598	9.30584	4.68322	6.37507	3.12832	4.31637	5.51919	7.30014	✓	-	✓	-	-	-	-	-	3.91272	0.000524197	0.00294356
NR4A2	crovir-transcript-8197	✓	-	10.8078	12.2192	11.1143	9.58547	4.69488	4.76642	5.9992	3.12832	4.42609	✓	-	-	✓	-	-	-	-	5.42492	NA	NA
ATF2	crovir-transcript-8315	-	✓	9.27167	8.88376	9.16458	7.61447	8.24772	8.47489	7.95426	7.84923	8.39084	✓	-	✓	-	✓	✓	-	-	1.06019	2.33848e-05	0.000176146
IKZF2	crovir-transcript-8481	-	✓	6.14172	6.28703	5.67599	3.12832	3.58259	3.12832	3.12832	3.12832	4.73293	✓	-	-	-	-	-	-	-	6.01	3.39262e-05	0.00020646
MEIS1	crovir-transcript-8589	✓	-	6.86044	6.8901	6.40505	4.48993	3.76815	7.79004	7.07517	6.48156	5.50584	✓	-	-	-	-	-	-	-	0.459267	0.667147	0.810959
GRHL1	crovir-transcript-8758	✓	✓	10.5562	11.0844	11.0908	4.25309	3.58259	4.76642	4.69027	4.94568	3.98205	✓	-	-	✓	-	-	-	-	7.94738	1.46962e-30	5.50006e-28
ZNF451	crovir-transcript-8917	-	✓	7.51617	8.8618	7.01485	6.59719	6.12338	6.2049	6.30833	6.19699	6.42546	✓	-	✓	-	-	-	-	-	1.90863	0.000125791	0.000733582
TBX3	crovir-transcript-9066	✓	✓	7.15269	8.02026	7.50376	7.10899	7.55104	4.03664	4.19665	6.06478	3.12832	✓	-	-	-	✓	-	-	-	3.12223	0.0103886	0.0341836
GRHL3	crovir-transcript-996	-	✓	4.14408	5.70947	6.46425	3.12832	3.58259	3.12832	3.12832	3.12832	3.89408	✓	-	-	-	-	-	-	-	6.01606	4.14657e-05	0.000284346
SUPT4H1	crovir-transcript-9971	-	✓	7.90459	8.12793	7.76885	7.19437	6.94854	6.8497	6.59975	6.74001	6.86355	✓	-	-	-	-	-	-	-	1.17738	1.35357e-05	0.000112075
