# Supplementary material for: Snake venom gene expression is coordinated by novel regulatory architecture and the integration of multiple co-opted vertebrate pathways
Source: HighWire-hosted journal article supplement (doi:10.1101/gr.276251.121), 2022-06-01
Supplement: Supplemental_Table_S3.xlsx [file Supplemental_Table_S3.xlsx]

## Sheet: Sheet1
Supplemental Table S3. Transcription factor binding site (TFBS) enrichment analysis details. Analysis statistics for TFBS enrichment analyses of venom gene promoters and enhancers compared to all non-venom gene promoters and enhancers, respectively.
Analysis	ID	Name	Deficit	# search sites	Mean sites per gene	# background sites	Mean sites per background gene	Mann Whitney U	Site p-value	# search genes	# search genes with TF site	# background genes	# background genes with TF site	Gene p-value	Average log2(proportion bound)	Log2 Enrichment	Significance Score
PLA2 Promoters	MA1471.1	BARX2	0.15	0	0	39741	3	36013.5	0.0133903	3	0	13159	10850	0.00541418	-1.54285	-2.52901	-2.26647
PLA2 Promoters	MA0638.1	CREB3	0.14	1	0.3	876	0.1	25081.5	0.416824	3	1	13159	804	0.172502	-2.62713	2.80948	0.763206
PLA2 Promoters	MA0136.2	ELF5	0.04	1	0.3	1440	0.1	24290	0.489148	3	1	13159	1316	0.271166	-2.27186	2.09893	0.566765
PLA2 Promoters	MA0647.1	GRHL1	0.04	0	0	67	0	19810.5	0.99127	3	0	13159	48	1	-5.44563	5.27655	8.649e-12
PLA2 Promoters	MA1547.1	PITX2	0.15	0	0	42742	3.2	37332	0.00750461	3	0	13159	11729	0.00128814	-1.48666	-2.64139	-2.89004
PLA2 Promoters	MA0498.2	MEIS1	0.01	2	0.7	25495	1.9	29820	0.125516	3	2	13159	10679	0.465624	-0.393344	-0.184166	-0.331965
PLA2 Promoters	MA1512.1	KLF11	0.15	0	0	7569	0.6	26626.5	0.295225	3	0	13159	4592	0.55622	-2.16305	-1.2886	-0.254753
PLA2 Promoters	MA1655.1	ZNF341	0.15	0	0	9891	0.8	29905.5	0.122342	3	0	13159	6778	0.11408	-1.88221	-1.85029	-0.942792
PLA2 Promoters	MA0729.1	RARA	0.14	0	0	7	0	19749	0.998727	3	0	13159	7	1	-6.79214	7.96957	-1.685e-12
PLA2 Promoters	MA1550.1	PPARD	0.13	0	0	70	0	19842	0.987451	3	0	13159	69	1	-5.18612	4.75752	5.731e-12
PLA2 Promoters	MA0753.2	ZNF740	0.15	0	0	16147	1.2	25267.5	0.400791	3	0	13159	3686	0.564474	-2.32157	-0.971574	-0.248356
PLA2 Promoters	MA0848.1	FOXO4	0.15	1	0.3	34987	2.7	34866	0.0215142	3	1	13159	11460	0.0457696	-0.710914	-1.02296	-1.33942
PLA2 Promoters	MA1632.1	ATF2	0.07	0	0	664	0.1	20616	0.893918	3	0	13159	585	1	-3.64882	1.68294	6.051e-12
PLA2 Promoters	MA0073.1	RREB1	0.11	0	0	61	0	19830	0.988906	3	0	13159	61	1	-5.27433	4.93395	7.961e-12
PLA2 Promoters	MA0881.1	Dlx4	0.13	0	0	92763	7	38293.5	0.00480694	3	0	13159	12370	0.000217101	-1.44828	-2.71815	-3.66334
PLA2 Promoters	MA0003.4	TFAP2A	0.15	6	2	4362	0.3	35510	0.0165434	3	3	13159	2422	0.00624786	-1.22077	2.44154	2.20427
PLA2 Promoters	MA0476.1	FOS	0.15	0	0	16002	1.2	30432	0.104156	3	0	13159	7129	0.0962758	-1.84579	-1.92312	-1.01648
PLA2 Promoters	MA1112.2	NR4A1	0.13	0	0	5093	0.4	25903.5	0.348831	3	0	13159	4110	0.556864	-2.24304	-1.12864	-0.254251
PLA2 Promoters	MA0609.2	CREM	0.15	0	0	1482	0.1	20869.5	0.863539	3	0	13159	754	1	-3.4659	1.31709	-1.576e-12
PLA2 Promoters	MA0760.1	ERF	0	1	0.3	35	0	26267.5	0.321113	3	1	13159	33	0.00773017	-4.92006	7.39534	2.11181
PLA2 Promoters	MA0151.1	Arid3a	0.06	0	0	43991	3.3	36597	0.0104105	3	0	13159	11239	0.00311454	-1.51744	-2.57983	-2.50661
PLA2 Promoters	MA0736.1	GLIS2	0.03	0	0	1	0	19740	0.999818	3	0	13159	1	1	-7.9531	10.2915	5.65e-12
PLA2 Promoters	MA1657.1	ZNF652	0.15	0	0	4420	0.3	25176	0.408631	3	0	13159	3625	0.566149	-2.3336	-0.947502	-0.247069
PLA2 Promoters	MA0163.1	PLAG1	0.12	0	0	304	0	20137.5	0.951651	3	0	13159	266	1	-4.21659	2.81847	9.344e-12
PLA2 Promoters	MA0019.1	Ddit3::Cebpa	0.15	1	0.3	20897	1.6	30695	0.0959137	3	1	13159	9718	0.169462	-0.829846	-0.785093	-0.770928
PLA2 Promoters	MA1544.1	OVOL1	0.08	0	0	327	0	20221.5	0.941489	3	0	13159	322	1	-4.07901	2.54331	4.921e-12
PLA2 Promoters	MA0846.1	FOXC2	0.15	1	0.3	42909	3.3	35112	0.0194797	3	1	13159	11490	0.0442424	-0.709028	-1.02673	-1.35416
PLA2 Promoters	MA0527.1	ZBTB33	0.06	0	0	225	0	19978.5	0.970906	3	0	13159	160	1	-4.58237	3.55003	1.1836e-11
PLA2 Promoters	MA0157.2	FOXO3	0.15	1	0.3	13726	1	26988.5	0.270575	3	1	13159	7976	0.565862	-0.972335	-0.500115	-0.24729
PLA2 Promoters	MA0042.2	FOXI1	0.15	0	0	14644	1.1	31989	0.0626543	3	0	13159	8167	0.054636	-1.74775	-2.11922	-1.26252
PLA2 Promoters	PH0082.1	Irx2	0.15	0	0	7047	0.5	24811.5	0.440758	3	0	13159	3382	0.574341	-2.38365	-0.847412	-0.24083
PLA2 Promoters	MA0691.1	TFAP4	0.12	0	0	11130	0.8	26197.5	0.326328	3	0	13159	4306	0.55562	-2.20944	-1.19584	-0.255222
PLA2 Promoters	MA0089.2	NFE2L1	0.14	0	0	595	0	20605.5	0.89518	3	0	13159	578	1	-3.6575	1.70029	1.0494e-11
PLA2 Promoters	MA0844.1	XBP1	0.04	0	0	48	0	19810.5	0.99127	3	0	13159	48	1	-5.44563	5.27655	8.649e-12
PLA2 Promoters	MA0861.1	TP73	0.11	0	0	209	0	19980	0.970725	3	0	13159	161	1	-4.57789	3.54107	5.775e-12
PLA2 Promoters	MA0819.1	CLOCK	0.07	2	0.7	1225	0.1	31414.5	0.076008	3	2	13159	628	0.00664447	-2.43674	3.90262	2.17754
PLA2 Promoters	MA0079.4	SP1	0.07	0	0	379	0	20262	0.936593	3	0	13159	349	1	-4.02101	2.42731	5.175e-12
PLA2 Promoters	MA1581.1	ZBTB6	0.15	0	0	6815	0.5	27249	0.253734	3	0	13159	5007	0.292849	-2.10065	-1.41341	-0.533356
PLA2 Promoters	MA1579.1	ZBTB26	0.06	0	0	9702	0.7	29679	0.130891	3	0	13159	6627	0.122369	-1.89846	-1.81779	-0.912329
PLA2 Promoters	MA0076.2	ELK4	0.01	1	0.3	136	0	26118	0.332318	3	1	13159	132	0.0300115	-3.92818	5.41158	1.52271
PLA2 Promoters	MA0139.1	CTCF	0.13	1	0.3	754	0.1	25238	0.403309	3	1	13159	707	0.15286	-2.71981	2.99484	0.815707
PLA2 Promoters	MA0686.1	SPDEF	0.12	1	0.3	981	0.1	24950	0.428383	3	1	13159	882	0.188074	-2.56038	2.67597	0.72567
PLA2 Promoters	MA1105.2	GRHL2	0.11	0	0	856	0.1	20964	0.852263	3	0	13159	817	1	-3.40805	1.20139	4.52e-13
PLA2 Promoters	MA0494.1	Nr1h3::Rxra	0.1	0	0	261	0	20074.5	0.959278	3	0	13159	224	1	-4.3403	3.06589	6.192e-12
PLA2 Promoters	MA0071.1	RORA	0.03	1	0.3	1796	0.1	23759.5	0.541168	3	1	13159	1664	0.333541	-2.10267	1.76055	0.476851
PLA2 Promoters	MA0596.1	SREBF2	0.11	1	0.3	3853	0.3	21167.5	0.828086	3	1	13159	3265	0.575008	-1.61656	0.788336	0.240326
PLA2 Promoters	MA0595.1	SREBF1	0.11	0	0	4208	0.3	24984	0.425377	3	0	13159	3497	0.570158	-2.35953	-0.895646	-0.244005
PLA2 Promoters	MA0671.1	NFIX	0.02	0	0	21694	1.6	35002.5	0.0203636	3	0	13159	10176	0.0116672	-1.58911	-2.43649	-1.93303
PLA2 Promoters	MA0145.2	Tcfcp2l1	0.13	2	0.7	6092	0.5	25774	0.359049	3	2	13159	3877	0.209352	-1.12417	1.27748	0.679124
PLA2 Promoters	MA0833.2	ATF4	0.1	0	0	2520	0.2	23107.5	0.608674	3	0	13159	2246	1	-2.67885	-0.257001	-7.636e-12
PLA2 Promoters	MA0628.1	POU6F1	0.04	0	0	11616	0.9	26160	0.329145	3	0	13159	4281	0.555702	-2.21364	-1.18744	-0.255158
PLA2 Promoters	MA0442.2	SOX10	0.02	1	0.3	10320	0.8	24833	0.438824	3	1	13159	6935	0.605888	-1.07321	-0.29836	-0.217607
PLA2 Promoters	MA0820.1	FIGLA	0.02	4	1.3	2957	0.2	36365.5	0.0115137	3	3	13159	2545	0.00724803	-1.18504	2.37008	2.13978
PLA2 Promoters	MA0670.1	NFIA	0.01	0	0	8949	0.7	29193	0.15079	3	0	13159	6303	0.251281	-1.93462	-1.74548	-0.59984
PLA2 Promoters	MA0004.1	Arnt	0.08	5	1.7	5796	0.4	34736.5	0.0226577	3	3	13159	3286	0.015593	-1.00074	2.00148	1.80707
PLA2 Promoters	MA1466.1	ATF6	0.07	0	0	30	0	19783.5	0.994544	3	0	13159	30	1	-5.78022	5.94572	8.843e-12
PLA2 Promoters	MA0488.1	JUN	0.15	0	0	6871	0.5	27373.5	0.245949	3	0	13159	5090	0.288443	-2.08879	-1.43713	-0.539939
PLA2 Promoters	MA0741.1	KLF16	0.14	0	0	17749	1.3	28809	0.168083	3	0	13159	6047	0.254881	-1.96452	-1.68566	-0.593662
PLA2 Promoters	MA0077.1	SOX9	0.15	4	1.3	42504	3.2	29861.5	0.123967	3	2	13159	11765	0.285471	-0.323484	-0.323885	-0.544438
PLA2 Promoters	MA0608.1	Creb3l2	0.06	2	0.7	1305	0.1	31139	0.0831904	3	2	13159	987	0.0160763	-2.1108	3.25075	1.79381
PLA2 Promoters	MA1127.1	FOSB	0.13	0	0	691	0.1	20470.5	0.911428	3	0	13159	488	1	-3.77948	1.94425	5.026e-12
PLA2 Promoters	MA0752.1	ZNF410	0.1	0	0	30	0	19783.5	0.994544	3	0	13159	30	1	-5.78022	5.94572	8.843e-12
PLA2 Promoters	MA1566.1	TBX3	0.01	2	0.7	350	0	32378.5	0.0547536	3	2	13159	338	0.00196195	-2.88312	4.79538	2.70731
PLA2 Promoters	MA0607.1	Bhlha15	0.15	2	0.7	47425	3.6	32837.5	0.0465273	3	1	13159	10886	0.0792782	-0.747978	-0.948828	-1.10085
PLA2 Promoters	MA0657.1	KLF13	0.1	0	0	63	0	19830	0.988906	3	0	13159	61	1	-5.27433	4.93395	7.961e-12
PLA2 Promoters	MA0624.1	NFATC1	0.03	1	0.3	19630	1.5	30809.5	0.0924923	3	1	13159	9853	0.157727	-0.819894	-0.804996	-0.802094
PLA2 Promoters	MA0839.1	CREB3L1	0.1	1	0.3	107	0	26158.5	0.329258	3	1	13159	106	0.0241925	-4.08575	5.72672	1.61632
PLA2 Promoters	MA1643.1	NFIB	0.07	0	0	23	0	19767	0.996544	3	0	13159	19	1	-6.10288	6.59106	4.959e-12
PLA2 Promoters	MA1151.1	RORC	0.15	0	0	12263	0.9	31107	0.0840592	3	0	13159	7579	0.0762962	-1.80164	-2.01142	-1.1175
PLA2 Promoters	MA0160.1	NR4A2	0.15	3	1	36526	2.8	30481.5	0.102564	3	1	13159	11913	0.0252508	-0.68295	-1.07889	-1.59772
PLA2 Promoters	MA0598.3	EHF	0.13	3	1	7746	0.6	28623	0.176976	3	3	13159	5561	0.0755197	-0.621279	1.24256	1.12194
PLA2 Promoters	MA1493.1	HES6	0.08	0	0	145	0	19950	0.97436	3	0	13159	141	1	-4.67326	3.7318	8.498e-12
SVMP Promoters	MA1471.1	BARX2	0.15	0	0	39741	3	84031.5	0.000158521	7	0	13159	10850	5.17302e-06	-2.09262	-3.62855	-5.28626
SVMP Promoters	MA0638.1	CREB3	0.11	0	0	428	0	47495	0.886222	7	0	13159	411	1	-4.45298	1.09218	8.422e-12
SVMP Promoters	MA0136.2	ELF5	0.05	5	0.7	2868	0.2	69446.5	0.0199879	7	5	13159	2465	0.00346759	-1.43181	1.96869	2.45997
SVMP Promoters	MA1547.1	PITX2	0.15	1	0.1	42742	3.2	85472	8.83246e-05	7	1	13159	11729	1.05875e-05	-1.24395	-2.15596	-4.97521
SVMP Promoters	MA0647.1	GRHL1	0.15	0	0	3430	0.3	51933	0.558865	7	0	13159	1679	0.606144	-3.43845	-0.93689	-0.217424
SVMP Promoters	MA0498.2	MEIS1	0.01	13	1.9	25495	1.9	49187.5	0.755469	7	7	13159	10679	0.360493	-0.15063	0.301261	0.443103
SVMP Promoters	MA1655.1	ZNF341	0.15	1	0.1	9891	0.8	64370.5	0.0685049	7	1	13159	6778	0.0628309	-1.6395	-1.36486	-1.20183
SVMP Promoters	MA1512.1	KLF11	0.15	0	0	7569	0.6	62128.5	0.109896	7	0	13159	4592	0.104379	-2.71282	-2.38814	-0.981387
SVMP Promoters	MA0729.1	RARA	0.14	0	0	7	0	46081	0.998056	7	0	13159	7	1	-7.34191	6.87004	4.04e-13
SVMP Promoters	MA1550.1	PPARD	0	0	0	0	0	46056.5	1	7	0	13159	0	1	-9.29535	10.7769	0
SVMP Promoters	MA0753.2	ZNF740	0.14	0	0	14665	1.1	58212	0.226627	7	0	13159	3473	0.201089	-2.91427	-1.98525	-0.696611
SVMP Promoters	MA0848.1	FOXO4	0.1	0	0	11007	0.8	70073.5	0.016897	7	0	13159	6862	0.00575946	-2.42309	-2.96759	-2.23962
SVMP Promoters	MA1632.1	ATF2	0.14	0	0	2985	0.2	54761	0.386586	7	0	13159	2487	0.360292	-3.15511	-1.50355	-0.443345
SVMP Promoters	MA0073.1	RREB1	0.09	0	0	19	0	46123	0.994722	7	0	13159	19	1	-6.65265	5.49152	5.487e-12
SVMP Promoters	MA0881.1	Dlx4	0.13	6	0.9	92763	7	84646	0.000123813	7	3	13159	12370	0.000394782	-0.594368	-1.01033	-3.40364
SVMP Promoters	MA0003.4	TFAP2A	0.15	0	0	4362	0.3	54533.5	0.399118	7	0	13159	2422	0.36242	-3.17421	-1.46535	-0.440788
SVMP Promoters	MA0476.1	FOS	0.14	0	0	14701	1.1	69583.5	0.0192733	7	0	13159	6722	0.00671721	-2.43796	-2.93786	-2.17281
SVMP Promoters	MA1112.2	NR4A1	0.15	8	1.1	10961	0.8	58521.5	0.21502	7	6	13159	7138	0.134433	-0.544431	0.675961	0.871495
SVMP Promoters	MA0609.2	CREM	0.08	0	0	318	0	46567.5	0.959462	7	0	13159	146	1	-5.19798	2.58217	1.324e-12
SVMP Promoters	MA0760.1	ERF	0.15	0	0	3850	0.3	57141	0.270218	7	0	13159	3167	0.207754	-2.98079	-1.8522	-0.68245
SVMP Promoters	MA0151.1	Arid3a	0.04	0	0	30967	2.4	83944	0.000164151	7	0	13159	10825	5.57733e-06	-2.09428	-3.62522	-5.25357
SVMP Promoters	MA0736.1	GLIS2	0.14	0	0	2202	0.2	51982	0.555592	7	0	13159	1693	0.605756	-3.43246	-0.948866	-0.217702
SVMP Promoters	MA1657.1	ZNF652	0.15	0	0	4420	0.3	58744	0.206945	7	0	13159	3625	0.201151	-2.88337	-2.04704	-0.696479
SVMP Promoters	MA0163.1	PLAG1	0	0	0	0	0	46056.5	1	7	0	13159	0	1	-9.29535	10.7769	0
SVMP Promoters	MA0019.1	Ddit3::Cebpa	0.13	1	0.1	13313	1	68218	0.0274978	7	1	13159	7696	0.0231278	-1.54788	-1.5481	-1.63587
SVMP Promoters	MA1544.1	OVOL1	0.02	0	0	51	0	46235	0.985834	7	0	13159	51	1	-5.9521	4.09043	1.647e-12
SVMP Promoters	MA0846.1	FOXC2	0.11	0	0	11648	0.9	70101.5	0.0167693	7	0	13159	6870	0.00570847	-2.42225	-2.96927	-2.24348
SVMP Promoters	MA0527.1	ZBTB33	0.08	0	0	346	0	47015.5	0.924005	7	0	13159	274	1	-4.74502	1.67626	7.86e-12
SVMP Promoters	MA0157.2	FOXO3	0.15	1	0.1	13726	1	69258.5	0.0210061	7	1	13159	7976	0.017348	-1.5221	-1.59965	-1.76075
SVMP Promoters	MA0042.2	FOXI1	0.15	8	1.1	14644	1.1	52695.5	0.509014	7	7	13159	8167	0.0495352	-0.344069	0.688138	1.30509
SVMP Promoters	PH0082.1	Irx2	0.12	0	0	4164	0.3	53046	0.486907	7	0	13159	1997	0.604183	-3.31336	-1.18705	-0.218831
SVMP Promoters	MA0691.1	TFAP4	0.11	14	2	10177	0.8	75141.5	0.00381522	7	7	13159	4097	0.000284934	-0.841644	1.68329	3.54526
SVMP Promoters	MA0089.2	NFE2L1	0.14	0	0	595	0	48079.5	0.840522	7	0	13159	578	1	-4.20727	0.600753	4.074e-12
SVMP Promoters	MA0844.1	XBP1	0.04	0	0	48	0	46224.5	0.986667	7	0	13159	48	1	-5.9954	4.17701	4.639e-12
SVMP Promoters	MA0861.1	TP73	0	0	0	0	0	46056.5	1	7	0	13159	0	1	-9.29535	10.7769	0
SVMP Promoters	MA0819.1	CLOCK	0.05	0	0	749	0.1	47673.5	0.872219	7	0	13159	462	1	-4.3687	0.923617	4.763e-12
SVMP Promoters	MA0079.4	SP1	0	0	0	0	0	46056.5	1	7	0	13159	0	1	-9.29535	10.7769	0
SVMP Promoters	MA1581.1	ZBTB6	0.15	0	0	6815	0.5	63581	0.0813091	7	0	13159	5007	0.0493154	-2.65042	-2.51295	-1.30702
SVMP Promoters	MA1579.1	ZBTB26	0.06	0	0	9702	0.7	69251	0.0210477	7	0	13159	6627	0.00744218	-2.44823	-2.91732	-2.1283
SVMP Promoters	MA0076.2	ELK4	0.12	5	0.7	6371	0.5	60054.5	0.163812	7	5	13159	4422	0.0469225	-1.01031	1.12571	1.32862
SVMP Promoters	MA0139.1	CTCF	0.08	0	0	150	0	46560.5	0.960017	7	0	13159	144	1	-5.20789	2.602	4.368e-12
SVMP Promoters	MA0686.1	SPDEF	0.08	0	0	258	0	46914	0.932027	7	0	13159	245	1	-4.82556	1.83735	6.793e-12
SVMP Promoters	MA1105.2	GRHL2	0.14	1	0.1	5268	0.4	54513	0.40026	7	1	13159	4166	0.443887	-1.99056	-0.662731	-0.352727
SVMP Promoters	MA0494.1	Nr1h3::Rxra	0.12	0	0	407	0	47299	0.90164	7	0	13159	355	1	-4.5585	1.30322	6.775e-12
SVMP Promoters	MA0071.1	RORA	0.13	0	0	11266	0.9	71071	0.0128405	7	0	13159	7147	0.00416553	-2.39374	-3.0263	-2.38033
SVMP Promoters	MA0596.1	SREBF2	0.06	7	1	967	0.1	88742.5	2.17695e-05	7	7	13159	917	8.20968e-09	-1.92113	3.84225	8.08567
SVMP Promoters	MA0671.1	NFIX	0.01	0	0	8958	0.7	68124	0.0281617	7	0	13159	6305	0.0161866	-2.48416	-2.84547	-1.79084
SVMP Promoters	MA0595.1	SREBF1	0.07	7	1	1261	0.1	87717	3.41421e-05	7	7	13159	1179	4.73592e-08	-1.73993	3.47986	7.3246
SVMP Promoters	MA0145.2	Tcfcp2l1	0.03	5	0.7	100	0	78606	0.00120515	7	5	13159	98	5.51147e-10	-3.75461	6.61431	9.25873
SVMP Promoters	MA0833.2	ATF4	0.15	0	0	2860	0.2	54827.5	0.382968	7	0	13159	2506	0.359781	-3.14962	-1.51453	-0.443962
SVMP Promoters	MA0628.1	POU6F1	0.04	0	0	11616	0.9	61040	0.136122	7	0	13159	4281	0.104379	-2.7634	-2.28697	-0.981388
SVMP Promoters	MA0442.2	SOX10	0.02	1	0.1	10320	0.8	65021	0.0592444	7	1	13159	6935	0.0579098	-1.62298	-1.3979	-1.23725
SVMP Promoters	MA0820.1	FIGLA	0.1	18	2.6	14898	1.1	76062.5	0.00283894	7	7	13159	6834	0.016105	-0.472598	0.945197	1.79304
SVMP Promoters	MA0670.1	NFIA	0.01	0	0	8949	0.7	68117	0.0282116	7	0	13159	6303	0.0161951	-2.48439	-2.84501	-1.79062
SVMP Promoters	MA0004.1	Arnt	0.1	0	0	8613	0.7	63514.5	0.0824709	7	0	13159	4988	0.0495951	-2.65316	-2.50746	-1.30456
SVMP Promoters	MA1466.1	ATF6	0.06	0	0	20	0	46126.5	0.994445	7	0	13159	20	1	-6.61658	5.41937	8.043e-12
SVMP Promoters	MA0488.1	JUN	0.1	6	0.9	1886	0.1	79124.5	0.00100461	7	6	13159	1658	2.52488e-05	-1.5973	2.7817	4.59776
SVMP Promoters	MA0741.1	KLF16	0.15	0	0	21264	1.6	68775	0.0238348	7	0	13159	6491	0.0156641	-2.46319	-2.88741	-1.80509
SVMP Promoters	MA0077.1	SOX9	0.07	0	0	6406	0.5	63259	0.0870605	7	0	13159	4915	0.0507913	-2.66379	-2.4862	-1.29421
SVMP Promoters	MA0608.1	Creb3l2	0.15	0	0	6017	0.5	57102.5	0.271885	7	0	13159	3156	0.20817	-2.9833	-1.84718	-0.681583
SVMP Promoters	MA1127.1	FOSB	0.06	0	0	254	0	46567.5	0.959462	7	0	13159	146	1	-5.19798	2.58217	1.324e-12
SVMP Promoters	MA0752.1	ZNF410	0	0	0	0	0	46056.5	1	7	0	13159	0	1	-9.29535	10.7769	0
SVMP Promoters	MA1566.1	TBX3	0.15	10	1.4	127495	9.7	89517.5	1.53913e-05	7	6	13159	12952	0.105505	-0.114662	-0.183577	-0.976726
SVMP Promoters	MA0607.1	Bhlha15	0.07	12	1.7	5246	0.4	76642	0.00234776	7	6	13159	2267	0.000157113	-1.37169	2.33048	3.80379
SVMP Promoters	MA0657.1	KLF13	0.03	0	0	1	0	46060	0.999722	7	0	13159	1	1	-8.50287	9.19196	3.823e-12
SVMP Promoters	MA0624.1	NFATC1	0.01	7	1	15449	1.2	46175.5	0.990556	7	7	13159	8767	0.103695	-0.292934	0.585867	0.984241
SVMP Promoters	MA0839.1	CREB3L1	0.07	0	0	20	0	46126.5	0.994445	7	0	13159	20	1	-6.61658	5.41937	8.043e-12
SVMP Promoters	MA1643.1	NFIB	0.07	0	0	23	0	46123	0.994722	7	0	13159	19	1	-6.65265	5.49152	5.487e-12
SVMP Promoters	MA1151.1	RORC	0.15	0	0	12263	0.9	72583	0.00832594	7	0	13159	7579	0.00247248	-2.35141	-3.11096	-2.60687
SVMP Promoters	MA0160.1	NR4A2	0.12	0	0	20240	1.5	80752	0.000558268	7	0	13159	9913	5.5937e-05	-2.15776	-3.49825	-4.2523
SVMP Promoters	MA0598.3	EHF	0.11	5	0.7	3484	0.3	67400.5	0.0337487	7	5	13159	2981	0.00828411	-1.29473	1.69454	2.08175
SVMP Promoters	MA1493.1	HES6	0.09	0	0	245	0	46868.5	0.935626	7	0	13159	232	1	-4.86481	1.91584	-3.86e-12
SVSP Promoters	MA1471.1	BARX2	0.14	7	0.7	34461	2.6	101000	0.00339483	10	4	13159	10486	0.00693473	-0.774982	-0.894821	-2.15897
SVSP Promoters	MA0638.1	CREB3	0.12	1	0.1	573	0	69669	0.747177	10	1	13159	538	0.341672	-3.70918	1.80366	0.46639
SVSP Promoters	MA0136.2	ELF5	0.1	10	1	32219	2.4	97674	0.00798467	10	6	13159	11426	0.0327924	-0.447799	-0.488157	-1.48423
SVSP Promoters	MA1547.1	PITX2	0.13	1	0.1	14176	1.1	102105	0.00251584	10	1	13159	8190	0.00103567	-1.74572	-2.12327	-2.98478
SVSP Promoters	MA0647.1	GRHL1	0.06	3	0.3	139	0	78522.5	0.289563	10	2	13159	84	0.00183347	-4.67666	5.21255	2.73673
SVSP Promoters	MA0498.2	MEIS1	0.01	6	0.6	25495	1.9	101060	0.00334159	10	5	13159	10679	0.0258467	-0.617073	-0.631625	-1.5876
SVSP Promoters	MA1512.1	KLF11	0.15	0	0	7569	0.6	88755	0.0560626	10	0	13159	4592	0.018391	-2.95554	-2.87356	-1.73539
SVSP Promoters	MA1655.1	ZNF341	0.15	0	0	9891	0.8	99685	0.00480151	10	0	13159	6778	0.00072208	-2.67469	-3.43525	-3.14141
SVSP Promoters	MA0729.1	RARA	0.14	0	0	7	0	65830	0.997676	10	0	13159	7	1	-7.58462	6.38461	1.3019e-11
SVSP Promoters	MA1550.1	PPARD	0.04	0	0	5	0	65820	0.99834	10	0	13159	5	1	-7.80835	6.83207	7.783e-12
SVSP Promoters	MA0753.2	ZNF740	0.15	0	0	16147	1.2	84225	0.125128	10	0	13159	3686	0.0715277	-3.11405	-2.55654	-1.14553
SVSP Promoters	MA0848.1	FOXO4	0.13	6	0.6	19352	1.5	90306	0.0413891	10	5	13159	9362	0.164601	-0.712012	-0.441747	-0.783567
SVSP Promoters	MA1632.1	ATF2	0.15	0	0	3561	0.3	80460	0.222349	10	0	13159	2933	0.130596	-3.27886	-2.22691	-0.884072
SVSP Promoters	MA0073.1	RREB1	0.05	0	0	5	0	65820	0.99834	10	0	13159	5	1	-7.80835	6.83207	7.783e-12
SVSP Promoters	MA0881.1	Dlx4	0.01	1	0.1	8854	0.7	90845.5	0.0371144	10	1	13159	6124	0.0244605	-1.9554	-1.70391	-1.61153
SVSP Promoters	MA0003.4	TFAP2A	0.15	0	0	4362	0.3	77905	0.313599	10	0	13159	2422	0.225123	-3.41693	-1.95078	-0.64758
SVSP Promoters	MA0476.1	FOS	0.13	0	0	11766	0.9	92800	0.024631	10	0	13159	5401	0.00715217	-2.8385	-3.10764	-2.14556
SVSP Promoters	MA0609.2	CREM	0.08	0	0	318	0	66525	0.951562	10	0	13159	146	1	-5.44069	2.09674	9.268e-12
SVSP Promoters	MA1112.2	NR4A1	0.15	0	0	10961	0.8	101485	0.00297956	10	0	13159	7138	0.00040421	-2.63736	-3.50991	-3.39339
SVSP Promoters	MA0760.1	ERF	0.15	0	0	3850	0.3	81630	0.187616	10	0	13159	3167	0.131242	-3.2235	-2.33763	-0.881928
SVSP Promoters	MA0151.1	Arid3a	0	3	0.3	19241	1.5	98757	0.00609111	10	3	13159	8954	0.0154247	-1.07019	-1.02954	-1.81178
SVSP Promoters	MA1657.1	ZNF652	0.15	1	0.1	4420	0.3	77681.5	0.322614	10	1	13159	3625	0.302729	-2.3336	-0.947502	-0.518946
SVSP Promoters	MA0736.1	GLIS2	0.15	0	0	3117	0.2	76535	0.371484	10	0	13159	2148	0.383277	-3.50351	-1.77761	-0.416487
SVSP Promoters	MA0163.1	PLAG1	0.04	0	0	4	0	65815	0.998672	10	0	13159	4	1	-7.9531	7.12157	7.061e-12
SVSP Promoters	MA0019.1	Ddit3::Cebpa	0.11	2	0.2	10156	0.8	87537	0.0704205	10	2	13159	6467	0.109782	-1.54761	-1.04556	-0.959467
SVSP Promoters	MA1544.1	OVOL1	0.15	0	0	1344	0.1	71940	0.609114	10	0	13159	1229	0.613422	-3.90614	-0.972356	-0.212241
SVSP Promoters	MA0846.1	FOXC2	0.11	3	0.3	11648	0.9	84875	0.112357	10	3	13159	6870	0.209979	-1.26129	-0.647345	-0.677825
SVSP Promoters	MA0527.1	ZBTB33	0.08	0	0	346	0	67165	0.909237	10	0	13159	274	1	-4.98774	1.19084	2.284e-12
SVSP Promoters	MA0157.2	FOXO3	0.14	7	0.7	9830	0.7	68334.5	0.83264	10	6	13159	6530	0.545765	-0.851359	0.318962	0.262994
SVSP Promoters	MA0042.2	FOXI1	0.15	2	0.2	14644	1.1	97501	0.00833175	10	2	13159	8167	0.00853589	-1.37926	-1.38225	-2.06875
SVSP Promoters	PH0082.1	Irx2	0.03	4	0.4	498	0	77698	0.321943	10	2	13159	254	0.0152827	-3.88134	3.62191	1.8158
SVSP Promoters	MA0691.1	TFAP4	0.07	7	0.7	4300	0.3	85378	0.103198	10	5	13159	2164	0.0146729	-1.76844	1.67111	1.83348
SVSP Promoters	MA0089.2	NFE2L1	0.06	0	0	27	0	65930	0.991037	10	0	13159	27	1	-6.64739	4.51014	1.818e-12
SVSP Promoters	MA0844.1	XBP1	0.02	0	0	4	0	65815	0.998672	10	0	13159	4	1	-7.9531	7.12157	7.061e-12
SVSP Promoters	MA0861.1	TP73	0.12	0	0	329	0	67040	0.917488	10	0	13159	249	1	-5.05662	1.3286	1.1881e-11
SVSP Promoters	MA0819.1	CLOCK	0.09	0	0	2874	0.2	73105	0.543002	10	0	13159	1462	0.614896	-3.78096	-1.22272	-0.211199
SVSP Promoters	MA0079.4	SP1	0.15	0	0	1499	0.1	71875	0.612906	10	0	13159	1216	0.613745	-3.91381	-0.957021	-0.212012
SVSP Promoters	MA1581.1	ZBTB6	0.15	0	0	6815	0.5	90830	0.0372317	10	0	13159	5007	0.0169668	-2.89313	-2.99838	-1.7704
SVSP Promoters	MA1579.1	ZBTB26	0.02	13	1.3	3552	0.3	107624	0.000500225	10	8	13159	3051	0.000238947	-1.20668	1.80366	3.6217
SVSP Promoters	MA0076.2	ELK4	0.12	2	0.2	6371	0.5	79990	0.237525	10	1	13159	4422	0.180139	-2.19026	-1.23418	-0.744392
SVSP Promoters	MA0139.1	CTCF	0.15	0	0	1366	0.1	71970	0.607368	10	0	13159	1235	0.613288	-3.90263	-0.97938	-0.212335
SVSP Promoters	MA0686.1	SPDEF	0.14	0	0	1496	0.1	72285	0.589165	10	0	13159	1298	0.612475	-3.86675	-1.05113	-0.212911
SVSP Promoters	MA1105.2	GRHL2	0.12	3	0.3	4723	0.4	70989.5	0.665563	10	2	13159	3910	0.733125	-1.91053	-0.31971	-0.134822
SVSP Promoters	MA0494.1	Nr1h3::Rxra	0.14	0	0	691	0.1	68870	0.798046	10	0	13159	615	1	-4.40526	0.0258846	2.31e-12
SVSP Promoters	MA0071.1	RORA	0.12	1	0.1	9271	0.7	91870.5	0.0300223	10	1	13159	6315	0.0224632	-1.93325	-1.74822	-1.64853
SVSP Promoters	MA0596.1	SREBF2	0.15	1	0.1	11193	0.9	96883	0.00968446	10	1	13159	7249	0.00699608	-1.83375	-1.9472	-2.15515
SVSP Promoters	MA0671.1	NFIX	0.1	46	4.6	94429	7.2	92174	0.0281599	10	9	13159	12910	0.174471	-0.0859749	-0.11683	-0.758276
SVSP Promoters	MA0595.1	SREBF1	0.15	1	0.1	11963	0.9	96733	0.010041	10	1	13159	7196	0.00715784	-1.83905	-1.93662	-2.14522
SVSP Promoters	MA0145.2	Tcfcp2l1	0.08	0	0	2152	0.2	74770	0.455167	10	0	13159	1795	0.376364	-3.63298	-1.51867	-0.424392
SVSP Promoters	MA0833.2	ATF4	0.04	5	0.5	372	0	96855	0.00975014	10	5	13159	363	3.72337e-06	-3.05545	4.24512	5.42906
SVSP Promoters	MA0628.1	POU6F1	0.02	2	0.2	6834	0.5	73430.5	0.52519	10	1	13159	2793	0.699255	-2.52166	-0.571396	-0.155365
SVSP Promoters	MA0442.2	SOX10	0.01	13	1.3	3557	0.3	112461	0.000103102	10	9	13159	3042	1.50927e-05	-1.12858	1.96839	4.82123
SVSP Promoters	MA0820.1	FIGLA	0.14	16	1.6	37967	2.9	87245	0.0742777	10	6	13159	11315	0.0402104	-0.454841	-0.474073	-1.39566
SVSP Promoters	MA0670.1	NFIA	0.01	3	0.3	8949	0.7	80651	0.216385	10	3	13159	6303	0.347958	-1.32342	-0.523083	-0.458473
SVSP Promoters	MA0004.1	Arnt	0.1	12	1.2	8613	0.7	91520	0.0323039	10	8	13159	4988	0.00848823	-0.852141	1.09457	2.07118
SVSP Promoters	MA1466.1	ATF6	0.15	0	0	234	0	66920	0.925416	10	0	13159	225	1	-5.12958	1.47452	7.144e-12
SVSP Promoters	MA0488.1	JUN	0.04	4	0.4	154	0	91391	0.0331802	10	4	13159	138	2.58779e-06	-3.89623	5.34768	5.58707
SVSP Promoters	MA0741.1	KLF16	0.15	0	0	21264	1.6	98250	0.00692046	10	0	13159	6491	0.00196416	-2.7059	-3.37284	-2.70682
SVSP Promoters	MA0077.1	SOX9	0.08	3	0.3	11647	0.9	86886	0.0792549	10	3	13159	7268	0.123407	-1.22067	-0.728587	-0.908659
SVSP Promoters	MA0608.1	Creb3l2	0.14	10	1	5469	0.4	94763.5	0.0159294	10	7	13159	2845	0.00142501	-1.34739	1.72392	2.84618
SVSP Promoters	MA1127.1	FOSB	0.06	0	0	254	0	66525	0.951562	10	0	13159	146	1	-5.44069	2.09674	9.268e-12
SVSP Promoters	MA0752.1	ZNF410	0.07	0	0	5	0	65820	0.99834	10	0	13159	5	1	-7.80835	6.83207	7.783e-12
SVSP Promoters	MA1566.1	TBX3	0.05	2	0.2	10362	0.8	89400	0.0495045	10	2	13159	6845	0.056696	-1.50663	-1.12751	-1.24645
SVSP Promoters	MA0607.1	Bhlha15	0.15	4	0.4	47425	3.6	113765	6.56061e-05	10	2	13159	10886	2.58695e-05	-1.17198	-1.79682	-4.58721
SVSP Promoters	MA0657.1	KLF13	0.03	0	0	1	0	65800	0.999668	10	0	13159	1	1	-8.74559	8.70654	7.382e-12
SVSP Promoters	MA0624.1	NFATC1	0.01	1	0.1	15449	1.2	105230	0.00103284	10	1	13159	8767	0.000361819	-1.69661	-2.22149	-3.44151
SVSP Promoters	MA0839.1	CREB3L1	0.11	1	0.1	133	0	71714	0.622343	10	1	13159	132	0.0965578	-4.72066	3.82661	1.01521
SVSP Promoters	MA1643.1	NFIB	0.06	0	0	8	0	65830	0.997676	10	0	13159	7	1	-7.58462	6.38461	1.3019e-11
SVSP Promoters	MA1151.1	RORC	0.15	4	0.4	12263	0.9	83894	0.132053	10	4	13159	7579	0.340688	-1.00916	-0.426462	-0.467643
SVSP Promoters	MA0160.1	NR4A2	0.15	7	0.7	36526	2.8	111206	0.000157596	10	5	13159	11913	0.00128608	-0.538197	-0.789378	-2.89073
SVSP Promoters	MA0598.3	EHF	0.15	6	0.6	19155	1.5	91235	0.0342671	10	4	13159	9612	0.02857	-0.837757	-0.769271	-1.54409
SVSP Promoters	MA1493.1	HES6	0	0	0	12	0	65850	0.996348	10	0	13159	11	1	-7.27629	5.76794	7.435e-12
PLA2 Enhancers	MA1471.1	BARX2	0.15	0	0	795	0.6	3540	0.203437	4	0	1294	476	0.303064	-2.30589	-1.72808	-0.518466
PLA2 Enhancers	MA0638.1	CREB3	0.02	0	0	4	0	2596	0.991473	4	0	1294	4	1	-5.66909	4.99833	6.13e-13
PLA2 Enhancers	MA0136.2	ELF5	0.02	1	0.3	41	0	3154.5	0.449162	4	1	1294	40	0.12062	-3.29165	3.41337	0.918582
PLA2 Enhancers	MA0647.1	GRHL1	0.1	2	0.5	140	0.1	3070	0.519623	4	1	1294	95	0.26488	-2.67286	2.17579	0.576951
PLA2 Enhancers	MA1547.1	PITX2	0.15	0	0	1298	1	4012	0.0571206	4	0	1294	712	0.0413091	-2.01568	-2.30849	-1.38395
PLA2 Enhancers	MA1655.1	ZNF341	0.14	4	1	498	0.4	3794.5	0.107001	4	3	1294	406	0.0952364	-1.01682	1.3085	1.0212
PLA2 Enhancers	MA0498.2	MEIS1	0.01	0	0	1268	1	3990	0.0610689	4	0	1294	701	0.0445076	-2.0269	-2.28605	-1.35157
PLA2 Enhancers	MA1512.1	KLF11	0.05	1	0.3	48	0	3145	0.456803	4	1	1294	44	0.131773	-3.2237	3.27748	0.880174
PLA2 Enhancers	MA0729.1	RARA	0	0	0	0	0	2588	1	4	0	1294	0	1	-7.25405	8.16825	0
PLA2 Enhancers	MA1550.1	PPARD	0.11	0	0	4	0	2596	0.991473	4	0	1294	4	1	-5.66909	4.99833	6.13e-13
PLA2 Enhancers	MA0753.2	ZNF740	0.05	0	0	187	0.1	2746	0.832825	4	0	1294	79	1	-3.59761	0.855371	9.34e-13
PLA2 Enhancers	MA0848.1	FOXO4	0.07	3	0.8	256	0.2	2903	0.673884	4	1	1294	220	0.526466	-2.06925	0.968582	0.27863
PLA2 Enhancers	MA1632.1	ATF2	0.09	0	0	129	0.1	2762	0.816185	4	0	1294	87	1	-3.52845	0.717043	5.36e-13
PLA2 Enhancers	MA0073.1	RREB1	0.1	0	0	3	0	2594	0.993604	4	0	1294	3	1	-5.85037	5.3609	1.219e-12
PLA2 Enhancers	MA0881.1	Dlx4	0.13	2	0.5	2190	1.7	3657.5	0.153063	4	1	1294	852	0.11939	-1.09379	-0.982339	-0.923031
PLA2 Enhancers	MA0003.4	TFAP2A	0.03	0	0	37	0	2660	0.923371	4	0	1294	36	1	-4.15914	1.97843	4.78e-13
PLA2 Enhancers	MA0476.1	FOS	0.13	0	0	614	0.5	3182	0.427456	4	0	1294	297	0.579538	-2.64568	-1.04849	-0.236918
PLA2 Enhancers	MA1112.2	NR4A1	0.09	1	0.3	174	0.1	2913	0.664156	4	1	1294	157	0.405377	-2.31197	1.45401	0.392141
PLA2 Enhancers	MA0609.2	CREM	0.03	0	0	15	0	2604	0.982946	4	0	1294	8	1	-5.21032	4.08079	2.8e-13
PLA2 Enhancers	MA0760.1	ERF	0.15	0	0	373	0.3	3160	0.444771	4	0	1294	286	0.581602	-2.67286	-0.994137	-0.235374
PLA2 Enhancers	MA1657.1	ZNF652	0.08	1	0.3	49	0	3141.5	0.459636	4	1	1294	46	0.13731	-3.19199	3.21406	0.862299
PLA2 Enhancers	MA0151.1	Arid3a	0.06	0	0	977	0.8	3654	0.154412	4	0	1294	533	0.14851	-2.22438	-1.89109	-0.828244
PLA2 Enhancers	MA0736.1	GLIS2	0.07	0	0	4	0	2596	0.991473	4	0	1294	4	1	-5.66909	4.99833	6.13e-13
PLA2 Enhancers	MA0163.1	PLAG1	0.12	0	0	33	0	2648	0.936113	4	0	1294	30	1	-4.28868	2.23752	5.76e-13
PLA2 Enhancers	MA0019.1	Ddit3::Cebpa	0.13	0	0	525	0.4	3354	0.30615	4	0	1294	383	0.326162	-2.46251	-1.41483	-0.486566
PLA2 Enhancers	MA1544.1	OVOL1	0.1	0	0	38	0	2660	0.923371	4	0	1294	36	1	-4.15914	1.97843	4.78e-13
PLA2 Enhancers	MA0846.1	FOXC2	0.07	1	0.3	112	0.1	3024.5	0.559799	4	1	1294	103	0.28428	-2.61483	2.05973	0.546254
PLA2 Enhancers	MA0527.1	ZBTB33	0.07	1	0.3	51	0	3159	0.445568	4	1	1294	35	0.106527	-3.3867	3.60347	0.972539
PLA2 Enhancers	MA0157.2	FOXO3	0.13	1	0.3	171	0.1	2920.5	0.656897	4	1	1294	153	0.396976	-2.33052	1.49112	0.401236
PLA2 Enhancers	MA0042.2	FOXI1	0.1	0	0	376	0.3	3210	0.405997	4	0	1294	311	0.577953	-2.61251	-1.11483	-0.238108
PLA2 Enhancers	PH0082.1	Irx2	0.02	0	0	5	0	2594	0.993604	4	0	1294	3	1	-5.85037	5.3609	1.219e-12
PLA2 Enhancers	MA0691.1	TFAP4	0.09	2	0.5	407	0.3	2848.5	0.72783	4	1	1294	193	0.477093	-2.16348	1.15703	0.321397
PLA2 Enhancers	MA0089.2	NFE2L1	0.11	1	0.3	16	0	3203	0.411301	4	1	1294	16	0.0514263	-3.93937	4.70882	1.28881
PLA2 Enhancers	MA0844.1	XBP1	0.02	0	0	4	0	2596	0.991473	4	0	1294	4	1	-5.66909	4.99833	6.13e-13
PLA2 Enhancers	MA0861.1	TP73	0.06	0	0	2	0	2592	0.995736	4	0	1294	2	1	-6.09309	5.84633	4.57e-13
PLA2 Enhancers	MA0819.1	CLOCK	0.04	0	0	54	0	2660	0.923371	4	0	1294	36	1	-4.15914	1.97843	4.78e-13
PLA2 Enhancers	MA0079.4	SP1	0.1	0	0	95	0.1	2746	0.832825	4	0	1294	79	1	-3.59761	0.855371	9.34e-13
PLA2 Enhancers	MA1581.1	ZBTB6	0.14	0	0	416	0.3	3232	0.389597	4	0	1294	322	0.577487	-2.58747	-1.1649	-0.238458
PLA2 Enhancers	MA1579.1	ZBTB26	0.01	0	0	43	0	2674	0.908531	4	0	1294	43	1	-4.03258	1.72531	9.3e-14
PLA2 Enhancers	MA0076.2	ELK4	0.13	1	0.3	1115	0.9	3358.5	0.303317	4	1	1294	639	0.624566	-1.30117	-0.567584	-0.204422
PLA2 Enhancers	MA0139.1	CTCF	0.04	0	0	4	0	2596	0.991473	4	0	1294	4	1	-5.66909	4.99833	6.13e-13
PLA2 Enhancers	MA0686.1	SPDEF	0.12	3	0.8	93	0.1	4349.5	0.0186092	4	3	1294	83	0.00107162	-2.15852	3.5919	2.96996
PLA2 Enhancers	MA1105.2	GRHL2	0	0	0	3	0	2594	0.993604	4	0	1294	3	1	-5.85037	5.3609	1.219e-12
PLA2 Enhancers	MA0494.1	Nr1h3::Rxra	0.11	1	0.3	20	0	3196.5	0.416262	4	1	1294	19	0.0602915	-3.81887	4.46781	1.21974
PLA2 Enhancers	MA0071.1	RORA	0.13	4	1	517	0.4	4228	0.0284553	4	4	1294	380	0.00757581	-0.883213	1.76643	2.12057
PLA2 Enhancers	MA0596.1	SREBF2	0.14	0	0	500	0.4	3340	0.315074	4	0	1294	376	0.329894	-2.4758	-1.38825	-0.481626
PLA2 Enhancers	MA0671.1	NFIX	0.1	14	3.5	6706	5.2	3157	0.447163	4	3	1294	1259	0.106527	-0.201057	-0.323026	-0.972539
PLA2 Enhancers	MA0595.1	SREBF1	0.15	0	0	582	0.4	3428	0.26178	4	0	1294	420	0.311179	-2.39607	-1.54771	-0.506989
PLA2 Enhancers	MA0145.2	Tcfcp2l1	0.11	0	0	457	0.4	3248	0.377926	4	0	1294	330	0.577562	-2.5698	-1.20025	-0.238402
PLA2 Enhancers	MA0833.2	ATF4	0.07	0	0	90	0.1	2762	0.816185	4	0	1294	87	1	-3.52845	0.717043	5.36e-13
PLA2 Enhancers	MA0628.1	POU6F1	0.04	0	0	268	0.2	2832	0.744446	4	0	1294	122	1	-3.28573	0.231616	2.29e-13
PLA2 Enhancers	MA0442.2	SOX10	0.01	2	0.5	159	0.1	3018.5	0.565207	4	1	1294	137	0.36248	-2.40993	1.64993	0.440716
PLA2 Enhancers	MA0820.1	FIGLA	0.01	1	0.3	38	0	3165	0.440801	4	1	1294	34	0.103689	-3.40731	3.64469	0.984269
PLA2 Enhancers	MA0670.1	NFIA	0.01	0	0	589	0.5	3452	0.248395	4	0	1294	432	0.307995	-2.37577	-1.5883	-0.511456
PLA2 Enhancers	MA0004.1	Arnt	0.08	3	0.8	519	0.4	3285.5	0.351428	4	2	1294	274	0.200281	-1.54276	1.38952	0.69836
PLA2 Enhancers	MA1466.1	ATF6	0.04	0	0	3	0	2594	0.993604	4	0	1294	3	1	-5.85037	5.3609	1.219e-12
PLA2 Enhancers	MA0488.1	JUN	0.15	0	0	409	0.3	3174	0.433707	4	0	1294	293	0.580203	-2.65544	-1.02896	-0.23642
PLA2 Enhancers	MA0741.1	KLF16	0.1	0	0	570	0.4	3238	0.385195	4	0	1294	325	0.577475	-2.5808	-1.17826	-0.238467
PLA2 Enhancers	MA0077.1	SOX9	0.12	7	1.8	678	0.5	4597.5	0.00726202	4	4	1294	461	0.0163344	-0.743996	1.48799	1.7869
PLA2 Enhancers	MA0608.1	Creb3l2	0.14	2	0.5	574	0.4	3120	0.477256	4	2	1294	287	0.216304	-1.50938	1.32276	0.664935
PLA2 Enhancers	MA1127.1	FOSB	0.08	0	0	96	0.1	2686	0.895836	4	0	1294	49	1	-3.93937	1.5389	6.64e-13
PLA2 Enhancers	MA0752.1	ZNF410	0.08	0	0	10	0	2594	0.993604	4	0	1294	3	1	-5.85037	5.3609	1.219e-12
PLA2 Enhancers	MA1566.1	TBX3	0.04	0	0	333	0.3	3170	0.436852	4	0	1294	291	0.580572	-2.66038	-1.0191	-0.236144
PLA2 Enhancers	MA0607.1	Bhlha15	0.15	0	0	2007	1.6	3934	0.072148	4	0	1294	673	0.0534877	-2.05629	-2.22728	-1.27175
PLA2 Enhancers	MA0657.1	KLF13	0.07	0	0	4	0	2596	0.991473	4	0	1294	4	1	-5.66909	4.99833	6.13e-13
PLA2 Enhancers	MA0624.1	NFATC1	0.03	1	0.3	1035	0.8	3374.5	0.293386	4	1	1294	653	0.370605	-1.28555	-0.598827	-0.431088
PLA2 Enhancers	MA0839.1	CREB3L1	0.06	0	0	4	0	2596	0.991473	4	0	1294	4	1	-5.66909	4.99833	6.13e-13
PLA2 Enhancers	MA1643.1	NFIB	0.07	0	0	3	0	2594	0.993604	4	0	1294	3	1	-5.85037	5.3609	1.219e-12
PLA2 Enhancers	MA1151.1	RORC	0.05	1	0.3	16	0	3203	0.411301	4	1	1294	16	0.0514263	-3.93937	4.70882	1.28881
PLA2 Enhancers	MA0160.1	NR4A2	0	1	0.3	29	0	3180	0.429014	4	1	1294	27	0.0836281	-3.57089	3.97186	1.07765
PLA2 Enhancers	MA0598.3	EHF	0.01	1	0.3	9	0	3217	0.400735	4	1	1294	9	0.0304972	-4.33761	5.50529	1.51574
PLA2 Enhancers	MA1493.1	HES6	0.09	0	0	32	0	2648	0.936113	4	0	1294	30	1	-4.28868	2.23752	5.76e-13
SVMP Enhancers	MA1471.1	BARX2	0.11	4	0.6	321	0.2	6164	0.101075	7	4	1296	244	0.0277308	-1.57184	1.66975	1.55704
SVMP Enhancers	MA0638.1	CREB3	0.1	0	0	45	0	4686.5	0.87952	7	0	1296	43	1	-4.40218	0.990572	7.96e-13
SVMP Enhancers	MA0136.2	ELF5	0.05	4	0.6	350	0.3	6036.5	0.130725	7	4	1296	281	0.0447881	-1.47019	1.46645	1.34884
SVMP Enhancers	MA1547.1	PITX2	0.01	6	0.9	159	0.1	7879.5	0.000758658	7	6	1296	147	1.51742e-05	-1.67114	2.92938	4.81889
SVMP Enhancers	MA0647.1	GRHL1	0.15	0	0	330	0.3	5106.5	0.565571	7	0	1296	163	0.606095	-3.44708	-0.919631	-0.217459
SVMP Enhancers	MA0498.2	MEIS1	0.01	13	1.9	1268	1	7010	0.0127125	7	7	1296	701	0.0178557	-0.443054	0.886107	1.74822
SVMP Enhancers	MA1512.1	KLF11	0.15	0	0	732	0.6	6121.5	0.110297	7	0	1296	453	0.103424	-2.71117	-2.39144	-0.985378
SVMP Enhancers	MA1655.1	ZNF341	0.15	0	0	555	0.4	6083	0.119214	7	0	1296	442	0.102841	-2.72888	-2.35602	-0.987834
SVMP Enhancers	MA0729.1	RARA	0	0	0	0	0	4536	1	7	0	1296	0	1	-7.62365	7.43352	0
SVMP Enhancers	MA1550.1	PPARD	0.08	0	0	2	0	4543	0.994375	7	0	1296	2	1	-6.46268	5.11159	4.85e-13
SVMP Enhancers	MA0753.2	ZNF740	0.03	1	0.1	20	0	5114	0.560472	7	1	1296	20	0.107742	-4.15239	3.66093	0.967613
SVMP Enhancers	MA0848.1	FOXO4	0	6	0.9	119	0.1	8012	0.000463685	7	6	1296	110	2.86643e-06	-1.87948	3.34605	5.54266
SVMP Enhancers	MA1632.1	ATF2	0.15	0	0	234	0.2	5127.5	0.55135	7	0	1296	169	0.604352	-3.42108	-0.971626	-0.21871
SVMP Enhancers	MA0073.1	RREB1	0.06	0	0	2	0	4543	0.994375	7	0	1296	2	1	-6.46268	5.11159	4.85e-13
SVMP Enhancers	MA0881.1	Dlx4	0.06	10	1.4	988	0.8	6053	0.126545	7	5	1296	549	0.14255	-0.842945	0.790972	0.846032
SVMP Enhancers	MA0003.4	TFAP2A	0.03	0	0	37	0	4662	0.899017	7	0	1296	36	1	-4.52874	1.24369	3.72e-13
SVMP Enhancers	MA0476.1	FOS	0.08	12	1.7	521	0.4	7014	0.012569	7	5	1296	230	0.00281268	-1.46962	2.04432	2.55088
SVMP Enhancers	MA1112.2	NR4A1	0.13	0	0	295	0.2	5411	0.378172	7	0	1296	250	0.358031	-3.13932	-1.53515	-0.44608
SVMP Enhancers	MA0609.2	CREM	0.15	0	0	194	0.1	4861.5	0.743039	7	0	1296	93	1	-3.8502	-0.113379	-6.2e-13
SVMP Enhancers	MA0760.1	ERF	0.13	0	0	247	0.2	5232.5	0.482997	7	0	1296	199	0.603489	-3.30353	-1.20673	-0.219331
SVMP Enhancers	MA0151.1	Arid3a	0.04	16	2.3	723	0.6	8324.5	0.000135829	7	7	1296	484	0.0010503	-0.710027	1.42005	2.97869
SVMP Enhancers	MA1657.1	ZNF652	0.15	5	0.7	163	0.1	6663	0.0321743	7	4	1296	142	0.00404485	-1.96128	2.44862	2.3931
SVMP Enhancers	MA0736.1	GLIS2	0.06	0	0	2	0	4543	0.994375	7	0	1296	2	1	-6.46268	5.11159	4.85e-13
SVMP Enhancers	MA0163.1	PLAG1	0.13	0	0	48	0	4686.5	0.87952	7	0	1296	43	1	-4.40218	0.990572	7.96e-13
SVMP Enhancers	MA0019.1	Ddit3::Cebpa	0.03	1	0.1	38	0	5051	0.603977	7	1	1296	38	0.192018	-3.69777	2.75169	0.716659
SVMP Enhancers	MA1544.1	OVOL1	0.15	0	0	103	0.1	4861.5	0.743039	7	0	1296	93	1	-3.8502	-0.113379	-6.2e-13
SVMP Enhancers	MA0846.1	FOXC2	0.08	6	0.9	166	0.1	7856.5	0.000824938	7	6	1296	151	1.7709e-05	-1.65184	2.89078	4.75181
SVMP Enhancers	MA0527.1	ZBTB33	0.15	0	0	284	0.2	5169.5	0.523449	7	0	1296	181	0.602517	-3.37174	-1.07031	-0.220031
SVMP Enhancers	MA0157.2	FOXO3	0.01	6	0.9	66	0.1	8193	0.000230325	7	6	1296	66	1.55665e-07	-2.24579	4.07867	6.80781
SVMP Enhancers	MA0042.2	FOXI1	0	6	0.9	119	0.1	8012	0.000463685	7	6	1296	110	2.86643e-06	-1.87948	3.34605	5.54266
SVMP Enhancers	PH0082.1	Irx2	0.13	0	0	181	0.1	4847.5	0.753725	7	0	1296	89	1	-3.88174	-0.0502999	-7.82e-13
SVMP Enhancers	MA0691.1	TFAP4	0.12	0	0	786	0.6	5691	0.244718	7	0	1296	330	0.201831	-2.9394	-1.93499	-0.695012
SVMP Enhancers	MA0089.2	NFE2L1	0.02	0	0	2	0	4543	0.994375	7	0	1296	2	1	-6.46268	5.11159	4.85e-13
SVMP Enhancers	MA0844.1	XBP1	0.14	0	0	126	0.1	4921	0.698195	7	0	1296	110	1	-3.7297	-0.354387	-6.96e-13
SVMP Enhancers	MA0861.1	TP73	0.06	0	0	2	0	4543	0.994375	7	0	1296	2	1	-6.46268	5.11159	4.85e-13
SVMP Enhancers	MA0819.1	CLOCK	0.08	1	0.1	228	0.2	4756	0.824644	7	1	1296	109	0.461452	-2.94377	1.24369	0.335874
SVMP Enhancers	MA0079.4	SP1	0.15	0	0	223	0.2	5124	0.553708	7	0	1296	168	0.604603	-3.42535	-0.963089	-0.21853
SVMP Enhancers	MA1581.1	ZBTB6	0.15	0	0	449	0.3	5719	0.233467	7	0	1296	338	0.200521	-2.92214	-1.9695	-0.69784
SVMP Enhancers	MA1579.1	ZBTB26	0.06	0	0	399	0.3	5656	0.25931	7	0	1296	320	0.204382	-2.96156	-1.89066	-0.689557
SVMP Enhancers	MA0076.2	ELK4	0.11	4	0.6	584	0.5	5528	0.317743	7	4	1296	380	0.204909	-1.25281	1.03169	0.688439
SVMP Enhancers	MA0139.1	CTCF	0.13	0	0	95	0.1	4844	0.756404	7	0	1296	88	1	-3.88985	-0.0340897	-5.82e-13
SVMP Enhancers	MA0686.1	SPDEF	0.12	0	0	95	0.1	4833.5	0.764458	7	0	1296	85	1	-3.91472	0.0156634	7.87e-13
SVMP Enhancers	MA1105.2	GRHL2	0.14	0	0	400	0.3	5659.5	0.257824	7	0	1296	321	0.204081	-2.95931	-1.89516	-0.690198
SVMP Enhancers	MA0494.1	Nr1h3::Rxra	0.14	0	0	57	0	4718	0.85456	7	0	1296	52	1	-4.26653	0.71927	6.75e-13
SVMP Enhancers	MA0071.1	RORA	0.12	6	0.9	431	0.3	6611.5	0.0365846	7	5	1296	326	0.0136025	-1.21846	1.54201	1.86638
SVMP Enhancers	MA0596.1	SREBF2	0.05	5	0.7	44	0	7622	0.00188289	7	5	1296	44	1.21745e-06	-2.65607	4.41721	5.91455
SVMP Enhancers	MA0671.1	NFIX	0.01	10	1.4	590	0.5	7037.5	0.0117548	7	6	1296	433	0.00714377	-0.893485	1.37407	2.14607
SVMP Enhancers	MA0595.1	SREBF1	0.04	5	0.7	19	0	7709.5	0.00139233	7	5	1296	19	2.80403e-08	-3.25123	5.60755	7.55222
SVMP Enhancers	MA0145.2	Tcfcp2l1	0.15	1	0.1	782	0.6	5536	0.313856	7	1	1296	443	0.433509	-1.93477	-0.774312	-0.363002
SVMP Enhancers	MA0833.2	ATF4	0.07	0	0	90	0.1	4840.5	0.759086	7	0	1296	87	1	-3.89804	-0.0176952	-6.64e-13
SVMP Enhancers	MA0628.1	POU6F1	0.04	6	0.9	268	0.2	5454.5	0.354924	7	2	1296	122	0.137435	-2.49437	1.81881	0.861904
SVMP Enhancers	MA0442.2	SOX10	0	1	0.1	3	0	5173.5	0.52083	7	1	1296	3	0.0213407	-5.42749	6.21112	1.67079
SVMP Enhancers	MA0820.1	FIGLA	0.13	12	1.7	2008	1.5	5396	0.386402	7	7	1296	837	0.0565941	-0.315231	0.630461	1.24723
SVMP Enhancers	MA0670.1	NFIA	0.01	10	1.4	589	0.5	7040	0.011671	7	6	1296	432	0.00705266	-0.895151	1.3774	2.15165
SVMP Enhancers	MA0004.1	Arnt	0.1	2	0.3	825	0.6	5423	0.371667	7	1	1296	460	0.432245	-1.90764	-0.828579	-0.36427
SVMP Enhancers	MA1466.1	ATF6	0.07	0	0	7	0	4560.5	0.980314	7	0	1296	7	1	-5.6702	3.52663	3.56e-13
SVMP Enhancers	MA0488.1	JUN	0.14	1	0.1	317	0.2	4752.5	0.827389	7	1	1296	238	1	-2.38224	0.120633	3.86e-13
SVMP Enhancers	MA0741.1	KLF16	0.15	4	0.6	1497	1.2	5622	0.274051	7	1	1296	539	0.250158	-1.79343	-1.057	-0.601785
SVMP Enhancers	MA0077.1	SOX9	0.07	10	1.4	233	0.2	8565	4.95234e-05	7	7	1296	195	1.96887e-06	-1.36469	2.72938	5.70578
SVMP Enhancers	MA0608.1	Creb3l2	0.04	1	0.1	104	0.1	4897.5	0.715791	7	1	1296	79	0.358916	-3.17473	1.7056	0.445007
SVMP Enhancers	MA1127.1	FOSB	0.15	0	0	137	0.1	4847.5	0.753725	7	0	1296	89	1	-3.88174	-0.0502999	-7.82e-13
SVMP Enhancers	MA0752.1	ZNF410	0.01	0	0	2	0	4543	0.994375	7	0	1296	2	1	-6.46268	5.11159	4.85e-13
SVMP Enhancers	MA1566.1	TBX3	0.08	2	0.3	1934	1.5	7006.5	0.0128392	7	2	1296	927	0.0234317	-1.03408	-1.10176	-1.6302
SVMP Enhancers	MA0607.1	Bhlha15	0.14	15	2.1	1697	1.3	6242.5	0.0856643	7	7	1296	642	0.00748192	-0.506427	1.01285	2.12599
SVMP Enhancers	MA0657.1	KLF13	0.06	0	0	2	0	4543	0.994375	7	0	1296	2	1	-6.46268	5.11159	4.85e-13
SVMP Enhancers	MA0624.1	NFATC1	0.01	13	1.9	636	0.5	7560.5	0.00231778	7	6	1296	464	0.0104729	-0.843661	1.27442	1.97993
SVMP Enhancers	MA0839.1	CREB3L1	0.07	0	0	7	0	4560.5	0.980314	7	0	1296	7	1	-5.6702	3.52663	3.56e-13
SVMP Enhancers	MA1643.1	NFIB	0.15	0	0	78	0.1	4721.5	0.851795	7	0	1296	53	1	-4.25292	0.692049	5.96e-13
SVMP Enhancers	MA1151.1	RORC	0.15	0	0	609	0.5	6058.5	0.125175	7	0	1296	435	0.102863	-2.74038	-2.33301	-0.987742
SVMP Enhancers	MA0160.1	NR4A2	0.06	4	0.6	202	0.2	6495.5	0.0484343	7	4	1296	167	0.00728043	-1.84468	2.21542	2.13784
SVMP Enhancers	MA0598.3	EHF	0.05	4	0.6	149	0.1	6635.5	0.0344691	7	4	1296	135	0.00336301	-1.99761	2.52129	2.47327
SVMP Enhancers	MA1493.1	HES6	0	0	0	2	0	4543	0.994375	7	0	1296	2	1	-6.46268	5.11159	4.85e-13
SVSP Enhancers	MA1471.1	BARX2	0.07	8	0.5	134	0.1	15090.5	0.00797145	17	8	1292	119	7.26944e-05	-2.23845	2.39326	4.1385
SVSP Enhancers	MA0638.1	CREB3	0.15	5	0.3	193	0.1	12805	0.239077	17	5	1292	157	0.0488291	-2.3533	1.36689	1.31132
SVSP Enhancers	MA0136.2	ELF5	0.1	47	2.8	2492	1.9	13648.5	0.085064	17	17	1292	986	0.0179289	-0.194887	0.389773	1.74645
SVSP Enhancers	MA0647.1	GRHL1	0.12	17	1	264	0.2	15055.5	0.00852158	17	8	1292	131	0.000140935	-2.16942	2.25521	3.85098
SVSP Enhancers	MA1547.1	PITX2	0.15	37	2.2	1285	1	13567.5	0.0949747	17	12	1292	708	0.226691	-0.676376	0.381898	0.644566
SVSP Enhancers	MA1512.1	KLF11	0.14	5	0.3	587	0.5	12897.5	0.216075	17	2	1292	392	0.114915	-2.26338	-1.08796	-0.939624
SVSP Enhancers	MA0498.2	MEIS1	0	4	0.2	103	0.1	12746.5	0.254487	17	4	1292	95	0.0340687	-2.85894	1.79916	1.46764
SVSP Enhancers	MA1655.1	ZNF341	0.03	0	0	116	0.1	11891.5	0.556964	17	0	1292	107	0.38876	-4.35852	-1.54153	-0.410318
SVSP Enhancers	MA0729.1	RARA	0	0	0	0	0	10982	1	17	0	1292	0	1	-8.23262	6.20667	0
SVSP Enhancers	MA1550.1	PPARD	0.08	0	0	2	0	10999	0.99124	17	0	1292	2	1	-7.07165	3.88474	1.11e-13
SVSP Enhancers	MA0753.2	ZNF740	0.14	14	0.8	620	0.5	12472	0.335927	17	5	1292	199	0.165871	-2.18278	1.02585	0.780229
SVSP Enhancers	MA0848.1	FOXO4	0.1	9	0.5	401	0.3	13317	0.131568	17	8	1292	317	0.0452711	-1.53358	0.983516	1.34418
SVSP Enhancers	MA1632.1	ATF2	0.15	5	0.3	231	0.2	11519.5	0.728502	17	3	1292	168	0.478023	-2.63064	0.617416	0.320551
SVSP Enhancers	MA0073.1	RREB1	0.06	0	0	2	0	10999	0.99124	17	0	1292	2	1	-7.07165	3.88474	1.11e-13
SVSP Enhancers	MA0881.1	Dlx4	0.13	67	3.9	2178	1.7	16352	0.000524434	17	17	1292	849	0.00121628	-0.302739	0.605478	2.91497
SVSP Enhancers	MA0003.4	TFAP2A	0.15	2	0.1	419	0.3	12268.5	0.406073	17	1	1292	231	0.335344	-3.0127	-1.06324	-0.47451
SVSP Enhancers	MA0476.1	FOS	0.03	3	0.2	169	0.1	11828.5	0.584605	17	3	1292	121	0.213061	-2.86653	1.08921	0.671496
SVSP Enhancers	MA1112.2	NR4A1	0.08	0	0	88	0.1	11662	0.660556	17	0	1292	80	0.618826	-4.56716	-1.12425	-0.208431
SVSP Enhancers	MA0609.2	CREM	0.04	2	0.1	42	0	11449.5	0.762719	17	1	1292	21	0.251687	-4.727	2.36536	0.59914
SVSP Enhancers	MA0760.1	ERF	0.15	5	0.3	373	0.3	11626	0.677486	17	5	1292	286	0.555176	-1.9217	0.503706	0.255569
SVSP Enhancers	MA0151.1	Arid3a	0.07	72	4.2	1895	1.5	15834.5	0.00172586	17	15	1292	809	0.0400635	-0.425074	0.499975	1.39725
SVSP Enhancers	MA1657.1	ZNF652	0.08	3	0.2	48	0	11904	0.551557	17	2	1292	46	0.126307	-3.80207	1.98943	0.898572
SVSP Enhancers	MA0736.1	GLIS2	0.14	3	0.2	109	0.1	11538	0.719546	17	2	1292	90	0.338276	-3.32173	1.02875	0.470729
SVSP Enhancers	MA0163.1	PLAG1	0.08	0	0	2	0	10999	0.99124	17	0	1292	2	1	-7.07165	3.88474	1.11e-13
SVSP Enhancers	MA0019.1	Ddit3::Cebpa	0.13	23	1.4	517	0.4	15456.5	0.00385683	17	11	1292	380	0.00523025	-1.18496	1.15847	2.28148
SVSP Enhancers	MA1544.1	OVOL1	0.09	1	0.1	21	0	11449.5	0.762719	17	1	1292	21	0.251687	-4.727	2.36536	0.59914
SVSP Enhancers	MA0846.1	FOXC2	0.14	26	1.5	1087	0.8	15150	0.00710884	17	14	1292	640	0.00715088	-0.642098	0.741592	2.14564
SVSP Enhancers	MA0527.1	ZBTB33	0.15	0	0	284	0.2	12520.5	0.320434	17	0	1292	181	0.151558	-3.9807	-2.29716	-0.819422
SVSP Enhancers	MA0157.2	FOXO3	0.14	12	0.7	411	0.3	13449.5	0.111044	17	8	1292	331	0.0536104	-1.50245	0.921263	1.27075
SVSP Enhancers	MA0042.2	FOXI1	0.09	6	0.4	304	0.2	12046.5	0.491795	17	5	1292	257	0.357564	-1.99869	0.657669	0.446646
SVSP Enhancers	PH0082.1	Irx2	0.15	15	0.9	259	0.2	14391.5	0.0276751	17	7	1292	127	0.000816556	-2.28199	2.1192	3.08801
SVSP Enhancers	MA0691.1	TFAP4	0.08	19	1.1	318	0.2	16079	0.000996008	17	10	1292	159	8.65469e-06	-1.87775	2.28157	5.06275
SVSP Enhancers	MA0089.2	NFE2L1	0.07	0	0	7	0	11041.5	0.969349	17	0	1292	7	1	-6.27917	2.29977	2.29e-13
SVSP Enhancers	MA0844.1	XBP1	0.14	0	0	126	0.1	11917	0.54596	17	0	1292	110	0.38863	-4.33866	-1.58124	-0.410464
SVSP Enhancers	MA0861.1	TP73	0.09	0	0	7	0	11041.5	0.969349	17	0	1292	7	1	-6.27917	2.29977	2.29e-13
SVSP Enhancers	MA0819.1	CLOCK	0.04	4	0.2	53	0	11985	0.517154	17	2	1292	35	0.0810226	-3.99678	2.37885	1.09139
SVSP Enhancers	MA0079.4	SP1	0.15	0	0	223	0.2	12410	0.356422	17	0	1292	168	0.151202	-4.03431	-2.18994	-0.820444
SVSP Enhancers	MA1581.1	ZBTB6	0.11	5	0.3	125	0.1	12080.5	0.478068	17	3	1292	109	0.17241	-2.94154	1.23923	0.763437
SVSP Enhancers	MA1579.1	ZBTB26	0.02	17	1	129	0.1	17910.5	7.66126e-06	17	12	1292	121	3.01193e-09	-1.94828	2.92571	8.52116
SVSP Enhancers	MA0076.2	ELK4	0.03	5	0.3	110	0.1	12192	0.434555	17	3	1292	94	0.125831	-3.04782	1.45178	0.900212
SVSP Enhancers	MA0139.1	CTCF	0.09	1	0.1	37	0	11329.5	0.822434	17	1	1292	35	0.379386	-4.36526	1.64188	0.420919
SVSP Enhancers	MA0686.1	SPDEF	0.15	0	0	192	0.1	12342	0.379786	17	0	1292	160	0.251439	-4.0694	-2.11976	-0.599567
SVSP Enhancers	MA1105.2	GRHL2	0.14	16	0.9	397	0.3	15050.5	0.00860288	17	10	1292	319	0.00304325	-1.37662	1.27931	2.51666
SVSP Enhancers	MA0494.1	Nr1h3::Rxra	0.07	0	0	7	0	11041.5	0.969349	17	0	1292	7	1	-6.27917	2.29977	2.29e-13
SVSP Enhancers	MA0071.1	RORA	0.01	2	0.1	10	0	12189	0.435695	17	2	1292	10	0.00971113	-4.87549	4.13628	2.01273
SVSP Enhancers	MA0596.1	SREBF2	0.13	14	0.8	342	0.3	14761.5	0.0146544	17	9	1292	278	0.00472145	-1.54789	1.33306	2.32592
SVSP Enhancers	MA0671.1	NFIX	0.02	49	2.9	1537	1.2	15794.5	0.00188408	17	16	1292	824	0.00891772	-0.366731	0.563684	2.04975
SVSP Enhancers	MA0595.1	SREBF1	0.11	10	0.6	228	0.2	14579	0.0201819	17	8	1292	194	0.00194483	-1.88707	1.6905	2.71112
SVSP Enhancers	MA0145.2	Tcfcp2l1	0.04	2	0.1	21	0	12095.5	0.472079	17	2	1292	21	0.0342283	-4.35852	3.10233	1.46561
SVSP Enhancers	MA0833.2	ATF4	0.05	6	0.4	34	0	14569	0.0205315	17	6	1292	34	5.36099e-06	-3.32813	3.79858	5.27075
SVSP Enhancers	MA0628.1	POU6F1	0.01	2	0.1	30	0	11500.5	0.73774	17	1	1292	15	0.189715	-4.96304	2.83743	0.721898
SVSP Enhancers	MA0442.2	SOX10	0.01	11	0.6	159	0.1	15105.5	0.00774558	17	8	1292	137	0.000191476	-2.13724	2.19084	3.71789
SVSP Enhancers	MA0670.1	NFIA	0.01	17	1	582	0.5	14548.5	0.0212647	17	11	1292	428	0.00897247	-1.09926	0.987076	2.04709
SVSP Enhancers	MA0820.1	FIGLA	0.1	41	2.4	1015	0.8	14863.5	0.0121871	17	11	1292	520	0.0483228	-0.958958	0.706473	1.31585
SVSP Enhancers	MA0004.1	Arnt	0.1	23	1.4	817	0.6	14125	0.0423814	17	10	1292	457	0.0707386	-1.11764	0.761355	1.15034
SVSP Enhancers	MA1466.1	ATF6	0.07	0	0	7	0	11041.5	0.969349	17	0	1292	7	1	-6.27917	2.29977	2.29e-13
SVSP Enhancers	MA0488.1	JUN	0.1	6	0.4	107	0.1	14048	0.0477003	17	6	1292	90	0.000850884	-2.63247	2.40726	3.07013
SVSP Enhancers	MA0741.1	KLF16	0.09	8	0.5	375	0.3	12320.5	0.387365	17	5	1292	230	0.208644	-2.07859	0.817474	0.680593
SVSP Enhancers	MA0077.1	SOX9	0.1	24	1.4	516	0.4	16914.5	0.00012751	17	13	1292	374	7.82301e-05	-1.08076	1.41273	4.10663
SVSP Enhancers	MA0608.1	Creb3l2	0.09	9	0.5	217	0.2	13713.5	0.0777307	17	6	1292	128	0.00492125	-2.37958	1.90148	2.30792
SVSP Enhancers	MA1127.1	FOSB	0.05	1	0.1	32	0	11444	0.765428	17	1	1292	21	0.251687	-4.727	2.36536	0.59914
SVSP Enhancers	MA0752.1	ZNF410	0.01	0	0	2	0	10999	0.99124	17	0	1292	2	1	-7.07165	3.88474	1.11e-13
SVSP Enhancers	MA1566.1	TBX3	0.13	126	7.4	5524	4.3	14541.5	0.0215202	17	17	1292	1187	0.389181	-0.0611184	0.122237	0.409849
SVSP Enhancers	MA0607.1	Bhlha15	0.1	9	0.5	414	0.3	12138	0.455337	17	5	1292	254	0.354194	-2.00714	0.674575	0.450758
SVSP Enhancers	MA0657.1	KLF13	0.06	0	0	2	0	10999	0.99124	17	0	1292	2	1	-7.07165	3.88474	1.11e-13
SVSP Enhancers	MA0624.1	NFATC1	0	1	0.1	6	0	11577	0.700792	17	1	1292	6	0.0876361	-5.58991	4.09119	1.05732
SVSP Enhancers	MA0839.1	CREB3L1	0.14	4	0.2	48	0	13164.5	0.158698	17	4	1292	47	0.00334485	-3.36273	2.80673	2.47562
SVSP Enhancers	MA1643.1	NFIB	0.09	0	0	8	0	11041.5	0.969349	17	0	1292	7	1	-6.27917	2.29977	2.29e-13
SVSP Enhancers	MA1151.1	RORC	0.06	5	0.3	32	0	13940	0.0560969	17	5	1292	32	6.62264e-05	-3.49172	3.64373	4.17897
SVSP Enhancers	MA0160.1	NR4A2	0.15	29	1.7	2132	1.7	12129.5	0.458659	17	8	1292	947	0.0246732	-0.744893	-0.593854	-1.60777
SVSP Enhancers	MA0598.3	EHF	0.07	4	0.2	209	0.2	11972.5	0.522389	17	4	1292	183	0.287604	-2.38784	0.856954	0.541206
SVSP Enhancers	MA1493.1	HES6	0.08	2	0.1	19	0	12112.5	0.465342	17	2	1292	19	0.0288469	-4.42895	3.24319	1.5399
