# Supplementary material for: Snake venom gene expression is coordinated by novel regulatory architecture and the integration of multiple co-opted vertebrate pathways
Source: HighWire-hosted journal article supplement (doi:10.1101/gr.276251.121), 2022-06-01
Supplement: Supplemental_Table_S4.xlsx [file Supplemental_Table_S4.xlsx]

## Sheet: Summary
Supplemental Table S4. De novo motif search results for promoters and enhancers, including significantly enriched motifs (e-value < 0.05) and permissive motif characterization results (e < 50) using TomTom.
Analysis	MOTIF_INDEX	MOTIF_SOURCE	MOTIF_ID	ALT_ID	CONSENSUS	WIDTH	SITES	E-VALUE	E-VALUE_SOURCE
Promoters	PromoterMotif_1	MEME	TATGAGA	MEME-1	TATGAGA	7	6	0.0033	MEME
Enhancers	EnhancerMotif_1	MEME	YMYWAMWGRMWRYT	MEME-1	YMYWAMWGRMWRYT	14	26	0.014	MEME

## Sheet: TomTomResults (e-value 50)
Query_ID	Target_ID	Optimal_offset	p-value	E-value	q-value	Overlap	Query_consensus	Target_consensus	Orientation
PromoterMotif_1	MA0752.1	6	0.00702648	4.06833	1	7	TATGAGA	GAGTATTATGGGATGGA	-
PromoterMotif_1	MA1137.1	1	0.020633	11.9465	1	7	TATGAGA	GTATGAGTCATCA	-
PromoterMotif_1	MA1128.1	1	0.0232867	13.483	1	7	TATGAGA	GGATGAGTCATCA	-
PromoterMotif_1	MA0907.1	4	0.024413	14.1351	1	7	TATGAGA	TTTTTACGAGC	-
PromoterMotif_1	MA1130.1	1	0.0331301	19.1823	1	7	TATGAGA	GGATGAGTCATC	+
PromoterMotif_1	MA1134.1	0	0.0331301	19.1823	1	7	TATGAGA	GATGAGTCATCC	+
PromoterMotif_1	MA0462.1	2	0.0344415	19.9416	1	7	TATGAGA	GAAATGACTCA	+
PromoterMotif_1	MA1141.1	1	0.0409255	23.6958	1	7	TATGAGA	GGATGAGTCATCG	+
PromoterMotif_1	MA0655.1	-1	0.0428424	24.8057	1	6	TATGAGA	ATGAGTCAT	-
PromoterMotif_1	MA1154.1	7	0.0429363	24.8601	1	7	TATGAGA	GTCGTGTTGTGGGAAAG	-
PromoterMotif_1	MA0492.1	0	0.0467567	27.0721	1	7	TATGAGA	GATGACATCATCTTT	-
PromoterMotif_1	MA1104.1	6	0.0521338	30.1854	1	7	TATGAGA	AAAAGATAAGAAA	+
PromoterMotif_1	MA0498.2	-1	0.0536544	31.0659	1	6	TATGAGA	TTGACAG	+
PromoterMotif_1	MA0802.1	3	0.0615305	35.6262	1	7	TATGAGA	AGGTGTGAAA	+
PromoterMotif_1	MA0099.3	-1	0.0615305	35.6262	1	6	TATGAGA	ATGAGTCATC	+
PromoterMotif_1	MA0627.1	9	0.0632132	36.6004	1	7	TATGAGA	TTGTATGCAAATTAGA	+
PromoterMotif_1	MA1142.1	-1	0.065216	37.76	1	6	TATGAGA	ATGAGTCATC	-
PromoterMotif_1	MA0037.3	1	0.0689066	39.8969	1	7	TATGAGA	AGATAAGA	+
PromoterMotif_1	MA1138.1	-1	0.0726896	42.0873	1	6	TATGAGA	ATGAGTCATC	-
PromoterMotif_1	MA1144.1	-1	0.0726896	42.0873	1	6	TATGAGA	ATGAGTCATC	-
PromoterMotif_1	MA0609.1	0	0.0764728	44.2777	1	7	TATGAGA	TATGACGTAA	+
PromoterMotif_1	MA0909.1	4	0.0764728	44.2777	1	6	TATGAGA	TTTTTATTGG	-
PromoterMotif_1	MA1135.1	-1	0.0764728	44.2777	1	6	TATGAGA	ATGAGTCATC	-
PromoterMotif_1	MA0060.3	4	0.078473	45.4359	1	7	TATGAGA	AACCAATCAGA	+
PromoterMotif_1	MA0766.1	1	0.0815124	47.1957	1	7	TATGAGA	AGATAAGA	+
PromoterMotif_1	MA0789.1	0	0.0825853	47.8169	1	7	TATGAGA	TATGCAAAT	+
PromoterMotif_1	MA0025.1	1	0.0828742	47.9841	1	7	TATGAGA	TTATGTAACGT	+
PromoterMotif_1	MA0688.1	4	0.0828742	47.9841	1	7	TATGAGA	AAGGTGTGAAA	+
EnhancerMotif_1	MA0474.2	-4	0.00782843	4.53266	1	10	CCTTACAGAAAGCT	ACCGGAAGTG	+
EnhancerMotif_1	MA0098.3	-4	0.00845273	4.89413	1	10	CCTTACAGAAAGCT	ACCGGAAGTG	+
EnhancerMotif_1	MA0475.2	-4	0.00845273	4.89413	1	10	CCTTACAGAAAGCT	ACCGGAAGTG	+
EnhancerMotif_1	MA0765.1	-4	0.00983419	5.694	1	10	CCTTACAGAAAGCT	ACCGGAAGTG	+
EnhancerMotif_1	MA1119.1	-3	0.0101251	5.86246	1	11	CCTTACAGAAAGCT	AACTGAAACCTGATAC	+
EnhancerMotif_1	MA0156.2	-4	0.0105965	6.13538	1	10	CCTTACAGAAAGCT	ACCGGAAGTG	+
EnhancerMotif_1	MA0764.1	-4	0.0132032	7.64463	1	10	CCTTACAGAAAGCT	ACCGGAAGTA	+
EnhancerMotif_1	MA0761.1	-4	0.0141892	8.21554	1	10	CCTTACAGAAAGCT	ACCGGAAGTA	+
EnhancerMotif_1	MA0759.1	-4	0.0163579	9.4712	1	10	CCTTACAGAAAGCT	ACCGGAAGTA	+
EnhancerMotif_1	MA0763.1	-4	0.0188119	10.8921	1	10	CCTTACAGAAAGCT	ACCGGAAGTG	+
EnhancerMotif_1	MA0028.2	-4	0.0215823	12.4962	1	10	CCTTACAGAAAGCT	ACCGGAAGTG	+
EnhancerMotif_1	MA0760.1	-4	0.0230971	13.3732	1	10	CCTTACAGAAAGCT	ACCGGAAGTG	+
EnhancerMotif_1	MA0500.1	-7	0.0251708	14.5739	1	7	CCTTACAGAAAGCT	GACAGCTGCAG	+
EnhancerMotif_1	MA0025.1	1	0.0268243	15.5313	1	10	CCTTACAGAAAGCT	ACGTTACATAA	-
EnhancerMotif_1	MA0606.1	-4	0.0282143	16.3361	1	10	CCTTACAGAAAGCT	AATGGAAAAT	-
EnhancerMotif_1	MA0081.1	-4	0.0296267	17.1539	1	7	CCTTACAGAAAGCT	AGAGGAA	+
EnhancerMotif_1	MA0158.1	0	0.0307967	17.8313	1	8	CCTTACAGAAAGCT	AATTAGTG	-
EnhancerMotif_1	MA0762.1	-3	0.0323698	18.7421	1	11	CCTTACAGAAAGCT	AACCGGAAATA	+
EnhancerMotif_1	MA0796.1	-6	0.0334299	19.3559	1	8	CCTTACAGAAAGCT	TGACAGCTGTCA	+
EnhancerMotif_1	MA0508.2	-5	0.0343059	19.8631	1	9	CCTTACAGAAAGCT	GTGAAAGTGA	-
EnhancerMotif_1	MA0521.1	-7	0.036602	21.1926	1	7	CCTTACAGAAAGCT	AACAGCTGCAG	+
EnhancerMotif_1	MA0144.2	-1	0.0388936	22.5194	1	11	CCTTACAGAAAGCT	TTTCCCAGAAG	-
EnhancerMotif_1	MA0076.2	-4	0.0388936	22.5194	1	10	CCTTACAGAAAGCT	GCCGGAAGTGG	-
EnhancerMotif_1	MA0667.1	-7	0.0389859	22.5729	1	7	CCTTACAGAAAGCT	AACAGCTGTT	-
EnhancerMotif_1	MA0100.3	-7	0.0415297	24.0457	1	7	CCTTACAGAAAGCT	GACAGTTGGT	-
EnhancerMotif_1	MA0136.2	-3	0.0493663	28.5831	1	11	CCTTACAGAAAGCT	ACCCGGAAGTA	+
EnhancerMotif_1	MA0816.1	-7	0.0500599	28.9847	1	7	CCTTACAGAAAGCT	AGCAGCTGCT	-
EnhancerMotif_1	MA0703.1	-2	0.051419	29.7716	1	8	CCTTACAGAAAGCT	TTAATTAA	-
EnhancerMotif_1	MA1115.1	-3	0.0554727	32.1187	1	11	CCTTACAGAAAGCT	ATATGCAAATT	+
EnhancerMotif_1	MA0518.1	-1	0.0555641	32.1716	1	13	CCTTACAGAAAGCT	TTTCCAGGAAATGG	+
EnhancerMotif_1	MA0597.1	-3	0.0588149	34.0539	1	9	CCTTACAGAAAGCT	TGCGGGCAG	-
EnhancerMotif_1	MA0797.1	-6	0.0592271	34.2925	1	8	CCTTACAGAAAGCT	TGACAGCTGTCA	+
EnhancerMotif_1	MA0898.1	6	0.0598029	34.6259	1	11	CCTTACAGAAAGCT	ACAAGCAATTAAAGAAT	+
EnhancerMotif_1	MA0519.1	-2	0.0622268	36.0293	1	11	CCTTACAGAAAGCT	TTCTTGGAAAT	-
EnhancerMotif_1	MA0698.1	1	0.0646018	37.4045	1	12	CCTTACAGAAAGCT	GAACATCTGGATG	-
EnhancerMotif_1	MA0601.1	-2	0.0696859	40.3481	1	11	CCTTACAGAAAGCT	TTAATTAATAT	-
EnhancerMotif_1	MA0107.1	-7	0.0718318	41.5906	1	7	CCTTACAGAAAGCT	GGAAATTCCC	-
EnhancerMotif_1	MA0523.1	3	0.0719786	41.6756	1	11	CCTTACAGAAAGCT	AAAGATCAAAGGAA	+
EnhancerMotif_1	MA0892.1	-1	0.0761608	44.0971	1	10	CCTTACAGAAAGCT	CCTAATTAAA	+
EnhancerMotif_1	MA0602.1	4	0.0796316	46.1067	1	10	CCTTACAGAAAGCT	CTAATATTGCTAAA	+
EnhancerMotif_1	MA0893.1	-1	0.0854889	49.4981	1	10	CCTTACAGAAAGCT	ACTAATTAAA	+
EnhancerMotif_1	MA0164.1	-9	0.0860529	49.8246	1	5	CCTTACAGAAAGCT	AAGCTTG	-
