# Supplementary material for: Snake venom gene expression is coordinated by novel regulatory architecture and the integration of multiple co-opted vertebrate pathways
Source: HighWire-hosted journal article supplement (doi:10.1101/gr.276251.121), 2022-06-01
Supplement: Supplemental_Table_S5.xlsx [file Supplemental_Table_S5.xlsx]

## Sheet: Sheet1
Supplemental Table S5. Full analysis details and statistics for all putative enhancer-gene pairs predicted by ABC analysis.
#Column definitions:
#activity_base	geometric mean of ATAC and H3K27ac signal
#TargetGene	target gene
#TargetGeneTSS	location of target gene tss
#TargetGeneExpression	normalized gene expression of target gene
#TargetGenePromoterActivityQuantile	quantile of activity score at target gene TSS
#distance	distance between enhancer and target gene TSS (bp)
#hic_contact	KR normalized Hi-C contact frequency between element and target gene
#hic_pseudocount	pseudocount added to Hi-C contact frequency
#ABC.Score.Numerator	Numerator of ABC score (Activity x Contact without dividing by the scores for other elements near target gene)
#ABC.Score	ABC score
chr	start	end	name	class	activity_base	TargetGene	TargetGeneTSS	TargetGeneExpression	TargetGenePromoterActivityQuantile	distance	hic_contact	hic_contact_pl_scaled	hic_pseudocount	hic_contact_pl_scaled_adj	ABC.Score.Numerator	ABC.Score	powerlaw.Score.Numerator	powerlaw.Score	geneType	newID3
scaffold-mi4	973466	973848	intergenic|scaffold-mi4:973466-973848	intergenic	1.18948	crovir-transcript-3	926489	263.942	0.115686	47168	0.011491	0.011491	0.001229	0.01272	0.01513	0.056123	0.02084	0.050593	NonVenom	NA
scaffold-mi4	1067558	1068277	intergenic|scaffold-mi4:1067558-1068277	intergenic	16.544	crovir-transcript-3	926489	263.942	0.115686	141428	0.006102	0.006102	0.001229	0.007332	0.121294	0.449927	0.111504	0.2707	NonVenom	NA
scaffold-mi4	1067558	1068277	intergenic|scaffold-mi4:1067558-1068277	intergenic	16.544	crovir-transcript-5	1070919	250.531	0.253902	3001.5	0.141921	0.141921	0.001229	0.14315	2.36827	0.91862	2.04212	0.810603	NonVenom	NA
scaffold-mi4	1067558	1068277	intergenic|scaffold-mi4:1067558-1068277	intergenic	16.544	crovir-transcript-35	2755087	252.992	0.674258	1.68717e+06	0	0	0.00078	0.00078	0.012901	0.056415	0.012901	0.020102	NonVenom	NA
scaffold-mi4	4109722	4110626	intergenic|scaffold-mi4:4109722-4110626	intergenic	16.229	crovir-transcript-35	2755087	252.992	0.674258	1355087	0	0	0.000944	0.000944	0.015314	0.066967	0.015314	0.023863	NonVenom	NA
scaffold-mi4	4639641	4639963	intergenic|scaffold-mi4:4639641-4639963	intergenic	1.30301	crovir-transcript-69	4643803	105.987	0.364122	4001	0.041372	0.041372	0.001229	0.042601	0.05551	0.111387	0.160838	0.217334	NonVenom	NA
scaffold-mi4	4710965	4711517	intergenic|scaffold-mi4:4710965-4711517	intergenic	4.66543	crovir-transcript-69	4643803	105.987	0.364122	67438	0.005881	0.005881	0.001229	0.00711	0.033172	0.066564	0.059891	0.080928	NonVenom	NA
scaffold-mi4	6097029	6097812	intergenic|scaffold-mi4:6097029-6097812	intergenic	9.43051	crovir-transcript-69	4643803	105.987	0.364122	1.45362e+06	0.002721	0.002721	0.000888	0.003609	0.034035	0.068296	0.008372	0.011313	NonVenom	NA
scaffold-mi4	6183408	6183838	intergenic|scaffold-mi4:6183408-6183838	intergenic	7.37741	crovir-transcript-85	6179918	161.397	0.529362	3705	0.092104	0.092104	0.001229	0.093333	0.688555	0.388464	0.910638	0.287781	NonVenom	NA
scaffold-mi4	6193971	6194668	intergenic|scaffold-mi4:6193971-6194668	intergenic	16.2614	crovir-transcript-85	6179918	161.397	0.529362	14401.5	0.014118	0.014118	0.001229	0.015347	0.249568	0.140799	0.799722	0.252729	NonVenom	NA
scaffold-mi4	6193971	6194668	intergenic|scaffold-mi4:6193971-6194668	intergenic	16.2614	crovir-transcript-93	6440007	1491.29	0.370802	245688	0.003598	0.003598	0.001229	0.004827	0.0785	0.058985	0.067787	0.042513	NonVenom	NA
scaffold-mi4	6196050	6196404	intergenic|scaffold-mi4:6196050-6196404	intergenic	5.85145	crovir-transcript-85	6179918	161.397	0.529362	16309	0.014202	0.014202	0.001229	0.015431	0.090297	0.050943	0.258256	0.081614	NonVenom	NA
scaffold-mi4	6203420	6203949	intergenic|scaffold-mi4:6203420-6203949	intergenic	8.47372	crovir-transcript-85	6179918	161.397	0.529362	23766.5	0.01306	0.01306	0.001229	0.014289	0.12108	0.06831	0.269519	0.085174	NonVenom	NA
scaffold-mi4	6445164	6445532	intergenic|scaffold-mi4:6445164-6445532	intergenic	2.36795	crovir-transcript-93	6440007	1491.29	0.370802	5341	0.102262	0.102262	0.001229	0.103491	0.245062	0.18414	0.275989	0.173088	NonVenom	NA
scaffold-mi4	6447747	6447953	intergenic|scaffold-mi4:6447747-6447953	intergenic	3.33053	crovir-transcript-93	6440007	1491.29	0.370802	7843	0.102262	0.102262	0.001229	0.103491	0.344681	0.258994	0.277899	0.174287	NonVenom	NA
scaffold-mi4	6571945	6572427	intergenic|scaffold-mi4:6571945-6572427	intergenic	9.54174	crovir-transcript-121	8160270	192.688	0.466752	1588084	0.002883	0.002883	0.000822	0.003705	0.035355	0.057432	0.007843	0.009178	NonVenom	NA
scaffold-mi4	6572796	6573373	intergenic|scaffold-mi4:6572796-6573373	intergenic	10.7514	crovir-transcript-121	8160270	192.688	0.466752	1.58719e+06	0.002883	0.002883	0.000822	0.003706	0.039842	0.06472	0.008842	0.010346	NonVenom	NA
scaffold-mi4	6661303	6661828	intergenic|scaffold-mi4:6661303-6661828	intergenic	11.9952	crovir-transcript-94	6559385	161.272	0.379486	102180	0.016352	0.016352	0.001229	0.017581	0.210894	0.055852	0.107269	0.022512	NonVenom	NA
scaffold-mi4	6661303	6661828	intergenic|scaffold-mi4:6661303-6661828	intergenic	11.9952	crovir-transcript-101	6659461	133.844	0.977106	2104.5	0.080126	0.080126	0.001229	0.081355	0.975877	0.313831	1.48064	0.32101	NonVenom	NA
scaffold-mi4	6667061	6667654	intergenic|scaffold-mi4:6667061-6667654	intergenic	8.2925	crovir-transcript-101	6659461	133.844	0.977106	7896.5	0.022867	0.022867	0.001229	0.024096	0.199816	0.064258	0.687846	0.149128	NonVenom	NA
scaffold-mi4	8090352	8090853	intergenic|scaffold-mi4:8090352-8090853	intergenic	4.01315	crovir-transcript-119	8076037	169.088	0.835064	14565.5	0.040928	0.040928	0.001229	0.042157	0.169183	0.114487	0.195429	0.103186	NonVenom	NA
scaffold-mi4	8409244	8409769	intergenic|scaffold-mi4:8409244-8409769	intergenic	10.285	crovir-transcript-128	8414412	111.046	0.680087	4905.5	0.037511	0.037511	0.001229	0.03874	0.39844	0.257241	1.26954	0.434217	NonVenom	NA
scaffold-mi4	8412755	8413110	intergenic|scaffold-mi4:8412755-8413110	intergenic	5.42354	crovir-transcript-128	8414412	111.046	0.680087	1479.5	0.060115	0.060115	0.001229	0.061344	0.332705	0.214801	0.669461	0.228974	NonVenom	NA
scaffold-mi4	9158412	9158894	genic|scaffold-mi4:9158412-9158894	genic	7.68791	crovir-transcript-147	9147926	237.124	0.826016	10727	0.029489	0.029489	0.001229	0.030718	0.236155	0.164617	0.488515	0.192276	NonVenom	NA
scaffold-mi4	9195663	9196435	intergenic|scaffold-mi4:9195663-9196435	intergenic	5.63945	crovir-transcript-144	9175604	133.706	0.897067	20445	0.019506	0.019506	0.001229	0.020735	0.116936	0.059335	0.20447	0.062247	NonVenom	NA
scaffold-mi4	9195663	9196435	intergenic|scaffold-mi4:9195663-9196435	intergenic	5.63945	crovir-transcript-153	9175697	528.719	0.914921	20352	0.019506	0.019506	0.001229	0.020735	0.116936	0.059335	0.205282	0.062518	NonVenom	NA
scaffold-mi4	9195663	9196435	intergenic|scaffold-mi4:9195663-9196435	intergenic	5.63945	crovir-transcript-150	9195020	106.672	0.569624	1029	0.088571	0.088571	0.001229	0.089801	0.506426	0.367946	0.696111	0.294046	NonVenom	NA
scaffold-mi4	9510558	9511076	intergenic|scaffold-mi4:9510558-9511076	intergenic	12.4447	crovir-transcript-170	9468197	142.788	0.572903	42620	0.002612	0.002612	0.001229	0.003842	0.047808	0.058876	0.23814	0.109056	NonVenom	NA
scaffold-mi4	9510558	9511076	intergenic|scaffold-mi4:9510558-9511076	intergenic	12.4447	crovir-transcript-163	9540708	302.55	0.596587	29891	0.006438	0.006438	0.001229	0.007667	0.095413	0.116685	0.324244	0.112637	NonVenom	NA
scaffold-mi4	9550309	9550988	intergenic|scaffold-mi4:9550309-9550988	intergenic	9.43899	crovir-transcript-170	9468197	142.788	0.572903	82451.5	0.004274	0.004274	0.001229	0.005503	0.051946	0.063971	0.10173	0.046587	NonVenom	NA
scaffold-mi4	9550309	9550988	intergenic|scaffold-mi4:9550309-9550988	intergenic	9.43899	crovir-transcript-163	9540708	302.55	0.596587	9940.5	0.003511	0.003511	0.001229	0.00474	0.044741	0.054716	0.640861	0.222623	NonVenom	NA
scaffold-mi4	13054646	13055606	intergenic|scaffold-mi4:13054646-13055606	intergenic	17.9021	crovir-transcript-195	13057361	104.154	0.537773	2235	0.157414	0.157414	0.001229	0.158643	2.84004	0.875226	2.20976	0.767575	NonVenom	NA
scaffold-mi4	13637106	13637421	genic|scaffold-mi4:13637106-13637421	genic	2.49725	crovir-transcript-212	13595262	662.088	0.407785	42001.5	0.025949	0.025949	0.001229	0.027178	0.06787	0.125385	0.048399	0.060942	NonVenom	NA
scaffold-mi4	14068188	14068563	intergenic|scaffold-mi4:14068188-14068563	intergenic	3.51929	crovir-transcript-227	14064224	100.873	0.428797	4151.5	0.103865	0.103865	0.001229	0.105094	0.369856	0.329661	0.434408	0.165604	NonVenom	NA
scaffold-mi4	14077115	14077796	intergenic|scaffold-mi4:14077115-14077796	intergenic	19.3838	crovir-transcript-227	14064224	100.873	0.428797	13231.5	0.00905	0.00905	0.001229	0.010279	0.199243	0.17759	1.0262	0.391207	NonVenom	NA
scaffold-mi4	14077115	14077796	intergenic|scaffold-mi4:14077115-14077796	intergenic	19.3838	crovir-transcript-256	15960682	165.106	0.570231	1.88323e+06	0.004454	0.004454	0.000709	0.005163	0.100081	0.098621	0.013737	0.008142	NonVenom	NA
scaffold-mi4	14129477	14130038	intergenic|scaffold-mi4:14129477-14130038	intergenic	14.4545	crovir-transcript-225	14132828	116.139	0.543572	3070.5	0.029763	0.029763	0.001229	0.030992	0.44797	0.4604	1.7842	0.637544	NonVenom	NA
scaffold-mi4	14200402	14200616	intergenic|scaffold-mi4:14200402-14200616	intergenic	2.51966	crovir-transcript-220	14202581	145.39	0.579401	2072	0.069655	0.069655	0.001229	0.070884	0.178604	0.290502	0.311017	0.271683	NonVenom	NA
scaffold-mi4	15439204	15439757	intergenic|scaffold-mi4:15439204-15439757	intergenic	12.5153	crovir-transcript-225	14132828	116.139	0.543572	1.30665e+06	0.003785	0.003785	0.000974	0.004759	0.059565	0.061218	0.01219	0.004356	NonVenom	NA
scaffold-mi4	15884855	15885486	intergenic|scaffold-mi4:15884855-15885486	intergenic	6.01456	crovir-transcript-263	15908407	725.294	0.154552	23236.5	0.010167	0.010167	0.001229	0.011396	0.068541	0.138983	0.195092	0.142699	NonVenom	NA
scaffold-mi4	15900775	15901008	intergenic|scaffold-mi4:15900775-15901008	intergenic	0.601109	crovir-transcript-263	15908407	725.294	0.154552	7515.5	0.105798	0.105798	0.001229	0.107027	0.064335	0.130455	0.052052	0.038073	NonVenom	NA
scaffold-mi4	15964206	15964448	genic|scaffold-mi4:15964206-15964448	genic	1.0474	crovir-transcript-256	15960682	165.106	0.570231	3645	0.080072	0.080072	0.001229	0.081302	0.085156	0.083913	0.129287	0.076628	NonVenom	NA
scaffold-mi4	15995433	15995834	intergenic|scaffold-mi4:15995433-15995834	intergenic	2.92839	crovir-transcript-259	15991727	119.013	0.832453	3906.5	0.047134	0.047134	0.001229	0.048363	0.141627	0.10368	0.361469	0.121766	NonVenom	NA
scaffold-mi4	16008938	16009560	intergenic|scaffold-mi4:16008938-16009560	intergenic	10.311	crovir-transcript-259	15991727	119.013	0.832453	17522	0.012388	0.012388	0.001229	0.013617	0.140408	0.102788	0.427546	0.144024	NonVenom	NA
scaffold-mi4	16114553	16115056	genic|scaffold-mi4:16114553-16115056	genic	4.59981	crovir-transcript-264	16112488	134.882	0.99168	2316.5	0.050649	0.050649	0.001229	0.051878	0.238629	0.096317	0.567782	0.095373	NonVenom	NA
scaffold-mi4	16121133	16121601	genic|scaffold-mi4:16121133-16121601	genic	5.82218	crovir-transcript-264	16112488	134.882	0.99168	8879	0.028238	0.028238	0.001229	0.029467	0.171562	0.069247	0.436101	0.073254	NonVenom	NA
scaffold-mi4	16129573	16129928	genic|scaffold-mi4:16129573-16129928	genic	5.56234	crovir-transcript-264	16112488	134.882	0.99168	17262.5	0.022464	0.022464	0.001229	0.023693	0.131791	0.053194	0.233656	0.039248	NonVenom	NA
scaffold-mi4	16212382	16213021	genic|scaffold-mi4:16212382-16213021	genic	8.67082	crovir-transcript-256	15960682	165.106	0.570231	252020	0.005108	0.005108	0.001229	0.006337	0.054945	0.054143	0.035354	0.020954	NonVenom	NA
scaffold-mi4	16634947	16635805	intergenic|scaffold-mi4:16634947-16635805	intergenic	30.571	crovir-transcript-263	15908407	725.294	0.154552	726969	0	0	0.001229	0.001229	0.037578	0.076198	0.049592	0.036274	NonVenom	NA
scaffold-ma4	758543	758716	genic|scaffold-ma4:758543-758716	genic	0.611876	crovir-transcript-3203	759410	139.546	0.592458	780.5	0.121748	0.121748	0.001229	0.122977	0.075247	0.218217	0.075528	0.143986	NonVenom	NA
scaffold-ma4	810544	810981	intergenic|scaffold-ma4:810544-810981	intergenic	3.50587	crovir-transcript-3202	815950	157.778	0.434505	5187.5	0.035445	0.035445	0.001229	0.036674	0.128573	0.363674	0.419112	0.45738	NonVenom	NA
scaffold-ma4	1001951	1003138	intergenic|scaffold-ma4:1001951-1003138	intergenic	22.871	crovir-transcript-3203	759410	139.546	0.592458	243134	0.00284	0.00284	0.001229	0.004069	0.093059	0.269873	0.09621	0.183414	NonVenom	NA
scaffold-ma4	1001951	1003138	intergenic|scaffold-ma4:1001951-1003138	intergenic	22.871	crovir-transcript-3202	815950	157.778	0.434505	186594	0	0	0.001229	0.001229	0.028113	0.079519	0.121122	0.132181	NonVenom	NA
scaffold-ma4	1001951	1003138	intergenic|scaffold-ma4:1001951-1003138	intergenic	22.871	crovir-transcript-3211	1004604	3714.07	0.647355	2059.5	0.051326	0.051326	0.001229	0.052556	1.202	0.88239	2.82311	0.902579	NonVenom	NA
scaffold-ma4	1001951	1003138	intergenic|scaffold-ma4:1001951-1003138	intergenic	22.871	crovir-transcript-3227	1783651	176.315	0.534129	781106	0	0	0.001229	0.001229	0.028113	0.116989	0.034854	0.069289	NonVenom	NA
scaffold-ma4	1960591	1960721	intergenic|scaffold-ma4:1960591-1960721	intergenic	25.4326	crovir-transcript-3203	759410	139.546	0.592458	1201246	0	0	0.001048	0.001048	0.026652	0.077292	0.026652	0.050809	NonVenom	NA
scaffold-ma4	1960591	1960721	intergenic|scaffold-ma4:1960591-1960721	intergenic	25.4326	crovir-transcript-3202	815950	157.778	0.434505	1144706	0	0	0.001093	0.001093	0.027794	0.078616	0.027794	0.030332	NonVenom	NA
scaffold-ma4	1960591	1960721	intergenic|scaffold-ma4:1960591-1960721	intergenic	25.4326	crovir-transcript-3227	1783651	176.315	0.534129	177005	0	0	0.001229	0.001229	0.031262	0.130092	0.141014	0.280336	NonVenom	NA
scaffold-ma4	1960591	1960721	intergenic|scaffold-ma4:1960591-1960721	intergenic	25.4326	crovir-transcript-3226	1994518	347.772	0.798749	33862	0.013796	0.013796	0.001229	0.015026	0.382142	0.300342	0.594498	0.252359	NonVenom	NA
scaffold-ma4	1984093	1984727	intergenic|scaffold-ma4:1984093-1984727	intergenic	11.2548	crovir-transcript-3227	1783651	176.315	0.534129	200759	0	0	0.001229	0.001229	0.013834	0.05757	0.055928	0.111185	NonVenom	NA
scaffold-ma4	1984093	1984727	intergenic|scaffold-ma4:1984093-1984727	intergenic	11.2548	crovir-transcript-3226	1994518	347.772	0.798749	10108	0.026282	0.026282	0.001229	0.027511	0.309632	0.243354	0.753119	0.319693	NonVenom	NA
scaffold-ma4	2007020	2007255	genic|scaffold-ma4:2007020-2007255	genic	2.67769	crovir-transcript-3227	1783651	176.315	0.534129	223486	0.003462	0.003462	0.001229	0.004691	0.012561	0.052272	0.012121	0.024096	NonVenom	NA
scaffold-ma4	2007955	2008265	genic|scaffold-ma4:2007955-2008265	genic	2.98939	crovir-transcript-3227	1783651	176.315	0.534129	224459	0.003462	0.003462	0.001229	0.004691	0.014023	0.058356	0.013481	0.0268	NonVenom	NA
scaffold-ma4	10604570	10604890	genic|scaffold-ma4:10604570-10604890	genic	5.68424	crovir-transcript-3254	10663402	199.493	0.643712	58672	0.015416	0.015416	0.001229	0.016645	0.094614	0.276471	0.082367	0.119542	NonVenom	NA
scaffold-ma4	10653838	10654035	intergenic|scaffold-ma4:10653838-10654035	intergenic	2.21575	crovir-transcript-3254	10663402	199.493	0.643712	9465.5	0.013349	0.013349	0.001229	0.014579	0.032303	0.094392	0.156985	0.227838	NonVenom	NA
scaffold-ma4	15767868	15768478	intergenic|scaffold-ma4:15767868-15768478	intergenic	3.68939	crovir-transcript-3268	15779073	127.99	0.635453	10900	0.015266	0.015266	0.001229	0.016495	0.060857	0.139328	0.231196	0.278639	NonVenom	NA
scaffold-ma4	15770092	15770232	intergenic|scaffold-ma4:15770092-15770232	intergenic	0.857109	crovir-transcript-3268	15779073	127.99	0.635453	8911	0.040208	0.040208	0.001229	0.041437	0.035516	0.081311	0.064	0.077133	NonVenom	NA
scaffold-ma4	15945404	15946300	intergenic|scaffold-ma4:15945404-15946300	intergenic	27.2922	crovir-transcript-3268	15779073	127.99	0.635453	166779	0	0	0.001229	0.001229	0.033547	0.076805	0.159366	0.192069	NonVenom	NA
scaffold-ma4	15945404	15946300	intergenic|scaffold-ma4:15945404-15946300	intergenic	27.2922	crovir-transcript-3270	15792381	112.107	0.583713	153471	0	0	0.001229	0.001229	0.033547	0.09494	0.171323	0.249016	NonVenom	NA
scaffold-ma4	16523054	16523810	genic|scaffold-ma4:16523054-16523810	genic	24.3758	crovir-transcript-3268	15779073	127.99	0.635453	744359	0	0	0.001229	0.001229	0.029963	0.068597	0.038737	0.046686	NonVenom	NA
scaffold-ma4	16523054	16523810	genic|scaffold-ma4:16523054-16523810	genic	24.3758	crovir-transcript-3270	15792381	112.107	0.583713	731051	0	0	0.001229	0.001229	0.029963	0.084795	0.03935	0.057195	NonVenom	NA
scaffold-ma4	18588292	18589930	intergenic|scaffold-ma4:18588292-18589930	intergenic	98.3923	crovir-transcript-3268	15779073	127.99	0.635453	2810038	0	0	0.0005	0.0005	0.049227	0.112702	0.049227	0.059329	NonVenom	NA
scaffold-ma4	18588292	18589930	intergenic|scaffold-ma4:18588292-18589930	intergenic	98.3923	crovir-transcript-3270	15792381	112.107	0.583713	2796730	0	0	0.000502	0.000502	0.049431	0.13989	0.049431	0.071847	NonVenom	NA
scaffold-ma4	18588292	18589930	intergenic|scaffold-ma4:18588292-18589930	intergenic	98.3923	crovir-transcript-3278	19420332	145.107	0.904233	831221	0	0	0.001229	0.001229	0.120943	0.058008	0.142046	0.058567	NonVenom	NA
scaffold-ma4	18588292	18589930	intergenic|scaffold-ma4:18588292-18589930	intergenic	98.3923	crovir-transcript-3284	19959072	959.99	0.380306	1369961	0	0	0.000935	0.000935	0.09197	0.104163	0.09197	0.075197	NonVenom	NA
scaffold-ma4	18588292	18589930	intergenic|scaffold-ma4:18588292-18589930	intergenic	98.3923	crovir-transcript-3328	23361706	569.953	0.653975	4772595	0	0	0.000316	0.000316	0.03105	0.054259	0.03105	0.040468	NonVenom	NA
scaffold-ma4	18591588	18593142	intergenic|scaffold-ma4:18591588-18593142	intergenic	88.6051	crovir-transcript-3268	15779073	127.99	0.635453	2813292	0	0	0.0005	0.0005	0.044286	0.101389	0.044286	0.053373	NonVenom	NA
scaffold-ma4	18591588	18593142	intergenic|scaffold-ma4:18591588-18593142	intergenic	88.6051	crovir-transcript-3270	15792381	112.107	0.583713	2799984	0	0	0.000502	0.000502	0.044469	0.125848	0.044469	0.064635	NonVenom	NA
scaffold-ma4	18591588	18593142	intergenic|scaffold-ma4:18591588-18593142	intergenic	88.6051	crovir-transcript-3278	19420332	145.107	0.904233	827967	0	0	0.001229	0.001229	0.108913	0.052238	0.128354	0.052922	NonVenom	NA
scaffold-ma4	18591588	18593142	intergenic|scaffold-ma4:18591588-18593142	intergenic	88.6051	crovir-transcript-3284	19959072	959.99	0.380306	1366707	0	0	0.000937	0.000937	0.082993	0.093996	0.082993	0.067858	NonVenom	NA
scaffold-ma4	18591588	18593142	intergenic|scaffold-ma4:18591588-18593142	intergenic	88.6051	crovir-transcript-3318	22226476	256.315	0.942248	3634111	0.000776	0.000776	0.0004	0.001176	0.10422	0.060076	0.035443	0.016061	NonVenom	NA
scaffold-ma4	19926655	19927563	intergenic|scaffold-ma4:19926655-19927563	intergenic	19.7959	crovir-transcript-3284	19959072	959.99	0.380306	31963	0.016725	0.016725	0.001229	0.017955	0.355427	0.402548	0.486566	0.397831	NonVenom	NA
scaffold-ma4	22366656	22367211	intergenic|scaffold-ma4:22366656-22367211	intergenic	10.8939	crovir-transcript-3320	22509900	250.411	0.218953	142966	0.008019	0.008019	0.001229	0.009248	0.100749	0.12073	0.072736	0.062266	NonVenom	NA
scaffold-ma4	22495436	22495879	intergenic|scaffold-ma4:22495436-22495879	intergenic	3.37538	crovir-transcript-3320	22509900	250.411	0.218953	14242.5	0.027333	0.027333	0.001229	0.028562	0.096408	0.115528	0.167609	0.143482	NonVenom	NA
scaffold-ma4	22549847	22550341	intergenic|scaffold-ma4:22549847-22550341	intergenic	3.55121	crovir-transcript-3320	22509900	250.411	0.218953	40194	0.013697	0.013697	0.001229	0.014927	0.053007	0.06352	0.07151	0.061216	NonVenom	NA
scaffold-ma4	23340207	23340626	intergenic|scaffold-ma4:23340207-23340626	intergenic	2.82831	crovir-transcript-3328	23361706	569.953	0.653975	21289.5	0.010196	0.010196	0.001229	0.011426	0.032315	0.05647	0.098998	0.129025	NonVenom	NA
scaffold-ma4	23357355	23357601	intergenic|scaffold-ma4:23357355-23357601	intergenic	0.956524	crovir-transcript-3328	23361706	569.953	0.653975	4228	0.069897	0.069897	0.001229	0.071126	0.068034	0.118887	0.11807	0.15388	NonVenom	NA
scaffold-ma4	25633155	25634296	genic|scaffold-ma4:25633155-25634296	genic	26.8218	crovir-transcript-3353	27462775	125.244	0.192263	1.82905e+06	0.001048	0.001048	0.000727	0.001775	0.047617	0.054196	0.019497	0.012771	NonVenom	NA
scaffold-ma4	27435608	27436069	genic|scaffold-ma4:27435608-27436069	genic	7.05141	crovir-transcript-3353	27462775	125.244	0.192263	26936.5	0.008943	0.008943	0.001229	0.010172	0.071727	0.081637	0.201134	0.131743	NonVenom	NA
scaffold-ma4	27599671	27600747	intergenic|scaffold-ma4:27599671-27600747	intergenic	23.255	crovir-transcript-3353	27462775	125.244	0.192263	137434	0.002417	0.002417	0.001229	0.003646	0.084781	0.096494	0.160692	0.105253	NonVenom	NA
scaffold-ma4	33080257	33080851	intergenic|scaffold-ma4:33080257-33080851	intergenic	2.45697	crovir-transcript-3426	33060194	106.759	0.997024	20360	0.046124	0.046124	0.001229	0.047353	0.116344	0.050198	0.089406	0.014716	NonVenom	NA
scaffold-ma4	33366819	33367192	intergenic|scaffold-ma4:33366819-33367192	intergenic	2.91647	crovir-transcript-3428	33359556	193.425	0.846177	7449.5	0.031378	0.031378	0.001229	0.032607	0.095097	0.05493	0.254494	0.136669	NonVenom	NA
scaffold-ma4	47791537	47792330	intergenic|scaffold-ma4:47791537-47792330	intergenic	20.4921	crovir-transcript-3530	47814127	327.566	0.825955	22193.5	0.013326	0.013326	0.001229	0.014555	0.298269	0.231211	0.691789	0.332901	NonVenom	NA
scaffold-ma4	48962071	48962419	genic|scaffold-ma4:48962071-48962419	genic	3.77301	crovir-transcript-3543	48960830	1211.55	0.843019	1415	0.06907	0.06907	0.001229	0.0703	0.265241	0.089244	0.465726	0.099703	NonVenom	NA
scaffold-ma4	55420400	55421228	intergenic|scaffold-ma4:55420400-55421228	intergenic	35.3583	crovir-transcript-3596	55536779	2717.71	0.558724	115965	0.003729	0.003729	0.001229	0.004959	0.175324	0.133754	0.283234	0.103858	NonVenom	NA
scaffold-ma4	55420400	55421228	intergenic|scaffold-ma4:55420400-55421228	intergenic	35.3583	crovir-transcript-3594	55557063	140.148	0.993563	136249	0.002299	0.002299	0.001229	0.003528	0.124747	0.053062	0.246173	0.044841	NonVenom	NA
scaffold-ma4	55547773	55548219	intergenic|scaffold-ma4:55547773-55548219	intergenic	7.04082	crovir-transcript-3596	55536779	2717.71	0.558724	11217	0.036937	0.036937	0.001229	0.038166	0.268721	0.205005	0.430347	0.157803	NonVenom	NA
scaffold-ma4	55557987	55558343	genic|scaffold-ma4:55557987-55558343	genic	8.90294	crovir-transcript-3594	55557063	140.148	0.993563	1102	0.041644	0.041644	0.001229	0.042873	0.3817	0.162359	1.09894	0.200176	NonVenom	NA
scaffold-ma4	55779296	55780817	intergenic|scaffold-ma4:55779296-55780817	intergenic	29.7854	crovir-transcript-3596	55536779	2717.71	0.558724	243278	0.004541	0.004541	0.001229	0.005771	0.171881	0.131126	0.125232	0.045921	NonVenom	NA
scaffold-ma4	56330030	56330713	intergenic|scaffold-ma4:56330030-56330713	intergenic	6.72783	crovir-transcript-3597	56333920	102.987	0.687132	3548.5	0.169164	0.169164	0.001229	0.170393	1.14637	0.453525	0.830457	0.316072	NonVenom	NA
scaffold-ma4	56339580	56339794	genic|scaffold-ma4:56339580-56339794	genic	2.06709	crovir-transcript-3597	56333920	102.987	0.687132	5767	0.169164	0.169164	0.001229	0.170393	0.352218	0.139343	0.225366	0.085775	NonVenom	NA
scaffold-ma4	58211328	58212167	intergenic|scaffold-ma4:58211328-58212167	intergenic	26.3054	crovir-transcript-3635	58360917	167.976	0.939394	149170	0.007408	0.007408	0.001229	0.008637	0.227202	0.092695	0.169263	0.044659	NonVenom	NA
scaffold-ma4	58382364	58382847	intergenic|scaffold-ma4:58382364-58382847	intergenic	14.3853	crovir-transcript-3635	58360917	167.976	0.939394	21688.5	0.019977	0.019977	0.001229	0.021206	0.305054	0.124458	0.495455	0.130724	NonVenom	NA
scaffold-ma4	58382364	58382847	intergenic|scaffold-ma4:58382364-58382847	intergenic	14.3853	crovir-transcript-3632	58396220	180.023	0.735228	13614.5	0.013325	0.013325	0.001229	0.014554	0.209367	0.096055	0.742903	0.19212	NonVenom	NA
scaffold-ma4	58390441	58390707	intergenic|scaffold-ma4:58390441-58390707	intergenic	3.32775	crovir-transcript-3632	58396220	180.023	0.735228	5646	0.080495	0.080495	0.001229	0.081724	0.271957	0.124771	0.369565	0.095572	NonVenom	NA
scaffold-ma4	58392244	58392720	intergenic|scaffold-ma4:58392244-58392720	intergenic	4.69284	crovir-transcript-3632	58396220	180.023	0.735228	3738	0.080495	0.080495	0.001229	0.081724	0.383517	0.175953	0.579266	0.149802	NonVenom	NA
scaffold-ma4	58650241	58650571	genic|scaffold-ma4:58650241-58650571	genic	2.26265	crovir-transcript-3644	58654351	102.188	0.843202	3945	0.115529	0.115529	0.001229	0.116758	0.264182	0.111152	0.279293	0.093169	NonVenom	NA
scaffold-ma4	58655327	58655669	intergenic|scaffold-ma4:58655327-58655669	intergenic	2.03579	crovir-transcript-3644	58654351	102.188	0.843202	1147	0.115529	0.115529	0.001229	0.116758	0.237694	0.100008	0.25129	0.083828	NonVenom	NA
scaffold-ma4	62127999	62128869	intergenic|scaffold-ma4:62127999-62128869	intergenic	7.25453	crovir-transcript-3687	62154537	109.468	0.768203	26103	0.006604	0.006604	0.001229	0.007833	0.056827	0.052604	0.212665	0.124876	NonVenom	NA
scaffold-ma4	69516905	69517890	intergenic|scaffold-ma4:69516905-69517890	intergenic	24.0675	crovir-transcript-3750	70475040	182.591	0.674379	957642	0	0	0.001229	0.001229	0.029584	0.063209	0.030719	0.054351	NonVenom	NA
scaffold-ma4	70473561	70473766	intergenic|scaffold-ma4:70473561-70473766	intergenic	0.70756	crovir-transcript-3750	70475040	182.591	0.674379	1376.5	0.097249	0.097249	0.001229	0.098478	0.069679	0.148877	0.087338	0.154527	NonVenom	NA
scaffold-ma4	70503484	70503654	intergenic|scaffold-ma4:70503484-70503654	intergenic	0.944694	crovir-transcript-3750	70475040	182.591	0.674379	28529	0.048782	0.048782	0.001229	0.050011	0.047246	0.100945	0.025633	0.045352	NonVenom	NA
scaffold-ma4	73500446	73501267	intergenic|scaffold-ma4:73500446-73501267	intergenic	7.83588	crovir-transcript-3779	73692818	181.722	0.901925	191962	0.006036	0.006036	0.001229	0.007265	0.056929	0.060884	0.040487	0.022277	NonVenom	NA
scaffold-ma4	79948556	79948966	intergenic|scaffold-ma4:79948556-79948966	intergenic	5.58759	crovir-transcript-3837	79942624	252.868	0.646687	6137	0.091743	0.091743	0.001229	0.092973	0.519493	0.393931	0.577115	0.337503	NonVenom	NA
scaffold-ma4	85128551	85128896	intergenic|scaffold-ma4:85128551-85128896	intergenic	82.0492	crovir-transcript-3893	85461961	21180	0.714641	333238	0	0	0.001229	0.001229	0.100855	0.17761	0.262361	0.320978	Venom	PER8_cvt3893-LAAO_3
scaffold-ma4	88246562	88247086	intergenic|scaffold-ma4:88246562-88247086	intergenic	9.50979	crovir-transcript-3933	88267066	181.1	0.479049	20242	0.009739	0.009739	0.001229	0.010968	0.104304	0.099148	0.347803	0.20341	NonVenom	NA
scaffold-ma4	88704322	88704842	genic|scaffold-ma4:88704322-88704842	genic	2.46265	crovir-transcript-3939	88706542	381.014	0.910791	1960	0.06199	0.06199	0.001229	0.063219	0.155687	0.092619	0.30398	0.121299	NonVenom	NA
scaffold-ma4	89363924	89364209	intergenic|scaffold-ma4:89363924-89364209	intergenic	3.5639	crovir-transcript-3947	89361063	3710.17	0.409182	3003.5	0.042725	0.042725	0.001229	0.043954	0.156648	0.125537	0.439914	0.176671	NonVenom	NA
scaffold-ma4	92129947	92130276	genic|scaffold-ma4:92129947-92130276	genic	1.40263	crovir-transcript-3990	92134526	133	0.980385	4414.5	0.101484	0.101484	0.001229	0.102713	0.144069	0.055468	0.173135	0.057285	NonVenom	NA
scaffold-ma4	99250763	99251730	intergenic|scaffold-ma4:99250763-99251730	intergenic	18.7429	crovir-transcript-4104	103032361	268.958	0.562215	3.78111e+06	0	0	0.000386	0.000386	0.007243	0.055118	0.007243	0.037366	NonVenom	NA
scaffold-ma4	99649536	99649688	intergenic|scaffold-ma4:99649536-99649688	intergenic	32.8275	crovir-transcript-4104	103032361	268.958	0.562215	3382749	0	0	0.000426	0.000426	0.013976	0.106356	0.013976	0.072101	NonVenom	NA
scaffold-ma4	100975691	100976859	genic|scaffold-ma4:100975691-100976859	genic	10.1218	crovir-transcript-4104	103032361	268.958	0.562215	2056086	0	0	0.000657	0.000657	0.006646	0.050571	0.006646	0.034283	NonVenom	NA
scaffold-ma4	101087269	101087667	intergenic|scaffold-ma4:101087269-101087667	intergenic	8.51712	crovir-transcript-4091	100845613	108.617	0.858201	241855	0.00431	0.00431	0.001229	0.005539	0.047178	0.05287	0.035993	0.023968	NonVenom	NA
scaffold-ma4	102647802	102648403	intergenic|scaffold-ma4:102647802-102648403	intergenic	6.26045	crovir-transcript-4104	103032361	268.958	0.562215	384258	0	0	0.001229	0.001229	0.007695	0.058559	0.017685	0.091233	NonVenom	NA
scaffold-ma4	102798407	102798627	intergenic|scaffold-ma4:102798407-102798627	intergenic	6.72136	crovir-transcript-4104	103032361	268.958	0.562215	233844	0	0	0.001229	0.001229	0.008262	0.06287	0.029249	0.15089	NonVenom	NA
scaffold-mi7	174953	175807	intergenic|scaffold-mi7:174953-175807	intergenic	20.4977	crovir-transcript-1028	219523	142.002	0.449991	44143	0.007027	0.007027	0.001229	0.008256	0.169237	0.10105	0.380442	0.109986	NonVenom	NA
scaffold-mi7	209169	209886	intergenic|scaffold-mi7:209169-209886	intergenic	11.7685	crovir-transcript-1028	219523	142.002	0.449991	9995.5	0.012132	0.012132	0.001229	0.013362	0.157246	0.093891	0.795196	0.229892	NonVenom	NA
scaffold-mi7	642967	643539	intergenic|scaffold-mi7:642967-643539	intergenic	6.22107	crovir-transcript-1043	648657	101.289	0.705289	5404	0.027306	0.027306	0.001229	0.028535	0.177518	0.089291	0.717719	0.189378	NonVenom	NA
scaffold-mi7	1130172	1130483	intergenic|scaffold-mi7:1130172-1130483	intergenic	5.65535	crovir-transcript-1055	1131257	1545.03	0.839983	929.5	0.068663	0.068663	0.001229	0.069892	0.395266	0.075756	0.698074	0.073656	NonVenom	NA
scaffold-mi7	1132339	1132616	genic|scaffold-mi7:1132339-1132616	genic	6.41071	crovir-transcript-1055	1131257	1545.03	0.839983	1220.5	0.068663	0.068663	0.001229	0.069892	0.448059	0.085874	0.791312	0.083494	NonVenom	NA
scaffold-mi7	1139760	1140183	intergenic|scaffold-mi7:1139760-1140183	intergenic	38.5818	crovir-transcript-1043	648657	101.289	0.705289	491314	0.004477	0.004477	0.001229	0.005706	0.220152	0.110736	0.088008	0.023222	NonVenom	NA
scaffold-mi7	1139760	1140183	intergenic|scaffold-mi7:1139760-1140183	intergenic	38.5818	crovir-transcript-1055	1131257	1545.03	0.839983	8714.5	0.068663	0.068663	0.001229	0.069892	2.69657	0.516821	2.93731	0.309926	NonVenom	NA
scaffold-mi7	1139760	1140183	intergenic|scaffold-mi7:1139760-1140183	intergenic	38.5818	crovir-transcript-1079	1182015	168.35	0.732374	42043.5	0.006894	0.006894	0.001229	0.008123	0.313415	0.067429	0.747097	0.115389	NonVenom	NA
scaffold-mi7	1182525	1182656	intergenic|scaffold-mi7:1182525-1182656	intergenic	1.89858	crovir-transcript-1079	1182015	168.35	0.732374	575.5	0.137506	0.137506	0.001229	0.138735	0.2634	0.056669	0.234353	0.036196	NonVenom	NA
scaffold-mi7	1186489	1186820	intergenic|scaffold-mi7:1186489-1186820	intergenic	6.68067	crovir-transcript-1079	1182015	168.35	0.732374	4639.5	0.137506	0.137506	0.001229	0.138735	0.926843	0.199405	0.824636	0.127365	NonVenom	NA
scaffold-mi7	2170269	2170882	intergenic|scaffold-mi7:2170269-2170882	intergenic	7.48925	crovir-transcript-1128	2174779	974.59	0.639673	4203.5	0.085405	0.085405	0.001229	0.086634	0.648827	0.260762	0.924443	0.266866	NonVenom	NA
scaffold-mi7	3014414	3015030	genic|scaffold-mi7:3014414-3015030	genic	14.9306	crovir-transcript-1163	3003864	172.593	0.970851	10858	0.014038	0.014038	0.001229	0.015267	0.227946	0.060754	0.938776	0.117403	NonVenom	NA
scaffold-mi7	3014414	3015030	genic|scaffold-mi7:3014414-3015030	genic	14.9306	crovir-transcript-PLA2_gIIE	3022112	408.745	0.977349	7390	0.022673	0.022673	0.001229	0.023902	0.356869	0.061902	1.31198	0.125661	NonVenom	NA
scaffold-mi7	3024168	3024690	genic|scaffold-mi7:3024168-3024690	genic	15.1542	crovir-transcript-PLA2_gIIE	3022112	408.745	0.977349	2317	0.068368	0.068368	0.001229	0.069597	1.05469	0.182945	1.87058	0.179163	NonVenom	PER36_PLA2_B1.PLA2_K.PLA2_A1
scaffold-mi7	3024168	3024690	genic|scaffold-mi7:3024168-3024690	genic	15.1542	crovir-transcript-PLA2_B1	3029446	23383.9	0.911034	5017	0.0405	0.0405	0.001229	0.041729	0.632372	0.133499	1.86506	0.178926	Venom	PER36_PLA2_B1.PLA2_K.PLA2_A1
scaffold-mi7	3024168	3024690	genic|scaffold-mi7:3024168-3024690	genic	15.1542	crovir-transcript-PLA2_K	3033792	130.596	0.807797	9363	0.041664	0.041664	0.001229	0.042893	0.650016	0.098221	1.08389	0.110726	Venom	PER36_PLA2_B1.PLA2_K.PLA2_A1
scaffold-mi7	3024168	3024690	genic|scaffold-mi7:3024168-3024690	genic	15.1542	crovir-transcript-PLA2_A1	3041890	106971	0.957977	17461	0.021918	0.021918	0.001229	0.023147	0.35078	0.054131	0.63028	0.072804	Venom	PER36_PLA2_B1.PLA2_K.PLA2_A1
scaffold-mi7	3030314	3030571	genic|scaffold-mi7:3030314-3030571	genic	5.34196	crovir-transcript-PLA2_B1	3029446	23383.9	0.911034	996.5	0.051043	0.051043	0.001229	0.052272	0.279235	0.058949	0.65939	0.063259	Venom	PER37_PLA2_B1.PLA2_K
scaffold-mi7	3030314	3030571	genic|scaffold-mi7:3030314-3030571	genic	5.34196	crovir-transcript-PLA2_K	3033792	130.596	0.807797	3349.5	0.118804	0.118804	0.001229	0.120033	0.64121	0.096891	0.65939	0.067361	Venom	PER37_PLA2_B1.PLA2_K
scaffold-mi7	3034975	3035307	intergenic|scaffold-mi7:3034975-3035307	intergenic	8.30443	crovir-transcript-PLA2_gIIE	3022112	408.745	0.977349	13029	0.033489	0.033489	0.001229	0.034718	0.288313	0.05001	0.445584	0.042678	NonVenom	PER38_PLA2_B1.PLA2_K.PLA2_A1
scaffold-mi7	3034975	3035307	intergenic|scaffold-mi7:3034975-3035307	intergenic	8.30443	crovir-transcript-PLA2_B1	3029446	23383.9	0.911034	5695	0.028654	0.028654	0.001229	0.029883	0.248162	0.052389	0.915347	0.087815	Venom	PER38_PLA2_B1.PLA2_K.PLA2_A1
scaffold-mi7	3034975	3035307	intergenic|scaffold-mi7:3034975-3035307	intergenic	8.30443	crovir-transcript-PLA2_K	3033792	130.596	0.807797	1349	0.118804	0.118804	0.001229	0.120033	0.996804	0.150623	1.02507	0.104717	Venom	PER38_PLA2_B1.PLA2_K.PLA2_A1
scaffold-mi7	3034975	3035307	intergenic|scaffold-mi7:3034975-3035307	intergenic	8.30443	crovir-transcript-PLA2_A1	3041890	106971	0.957977	6749	0.106906	0.106906	0.001229	0.108135	0.897999	0.138576	0.789655	0.091214	Venom	PER38_PLA2_B1.PLA2_K.PLA2_A1
scaffold-mi7	3044361	3044567	intergenic|scaffold-mi7:3044361-3044567	intergenic	3.03222	crovir-transcript-PLA2_A1	3041890	106971	0.957977	2574	0.106906	0.106906	0.001229	0.108135	0.327889	0.050599	0.374286	0.043234	Venom	PER39_PLA2_A1
scaffold-mi7	3501338	3502034	intergenic|scaffold-mi7:3501338-3502034	intergenic	52.0867	crovir-transcript-1168	3238871	278.745	0.764195	262815	0.00251	0.00251	0.001229	0.00374	0.19478	0.071814	0.204763	0.042197	NonVenom	NA
scaffold-mi7	3501338	3502034	intergenic|scaffold-mi7:3501338-3502034	intergenic	52.0867	crovir-transcript-1202	3485461	494.128	0.808101	16225	0.00944	0.00944	0.001229	0.01067	0.555743	0.152874	2.30922	0.302719	NonVenom	NA
scaffold-mi7	3684338	3685193	intergenic|scaffold-mi7:3684338-3685193	intergenic	21.0517	crovir-transcript-1221	3596035	538.215	0.878545	88730.5	0.013533	0.013533	0.001229	0.014763	0.31078	0.058687	0.212854	0.025228	NonVenom	NA
scaffold-mi7	3684338	3685193	intergenic|scaffold-mi7:3684338-3685193	intergenic	21.0517	crovir-transcript-1236	3643399	103.683	0.92986	41366.5	0.009099	0.009099	0.001229	0.010328	0.217432	0.060151	0.413443	0.073892	NonVenom	NA
scaffold-mi7	3813523	3814058	intergenic|scaffold-mi7:3813523-3814058	intergenic	4.75962	crovir-transcript-1240	3810193	132.428	0.668306	3597.5	0.110251	0.110251	0.001229	0.11148	0.530601	0.148083	0.587509	0.090606	NonVenom	NA
scaffold-mi7	3819949	3820343	genic|scaffold-mi7:3819949-3820343	genic	6.20653	crovir-transcript-1226	3828347	129.19	0.981114	8201	0.062449	0.062449	0.001229	0.063678	0.39522	0.052859	0.49815	0.054782	NonVenom	NA
scaffold-mi7	3832973	3833166	intergenic|scaffold-mi7:3832973-3833166	intergenic	3.58688	crovir-transcript-1226	3828347	129.19	0.981114	4722.5	0.125332	0.125332	0.001229	0.126561	0.45396	0.060715	0.442751	0.04869	NonVenom	NA
scaffold-mi7	3839099	3839660	genic|scaffold-mi7:3839099-3839660	genic	13.7092	crovir-transcript-1226	3828347	129.19	0.981114	11032.5	0.032129	0.032129	0.001229	0.033358	0.457308	0.061163	0.850105	0.093487	NonVenom	NA
scaffold-mi7	3948318	3948914	intergenic|scaffold-mi7:3948318-3948914	intergenic	7.75996	crovir-transcript-1244	3941440	137	0.987612	7176	0.073016	0.073016	0.001229	0.074245	0.576137	0.1115	0.699536	0.096689	NonVenom	NA
scaffold-mi7	4032307	4032616	genic|scaffold-mi7:4032307-4032616	genic	4.69875	crovir-transcript-1256	4035851	112.607	0.949353	3389.5	0.057127	0.057127	0.001229	0.058357	0.274203	0.061941	0.579995	0.078946	NonVenom	NA
scaffold-mi7	4049015	4049157	genic|scaffold-mi7:4049015-4049157	genic	2.25156	crovir-transcript-1260	4049718	246.419	0.839315	632	0.091401	0.091401	0.001229	0.09263	0.208562	0.054093	0.277924	0.029974	NonVenom	NA
scaffold-mi7	4054182	4054616	intergenic|scaffold-mi7:4054182-4054616	intergenic	5.87604	crovir-transcript-1260	4049718	246.419	0.839315	4681	0.041739	0.041739	0.001229	0.042968	0.252483	0.065485	0.725316	0.078225	NonVenom	NA
scaffold-mi7	4060198	4060714	intergenic|scaffold-mi7:4060198-4060714	intergenic	20.613	crovir-transcript-1260	4049718	246.419	0.839315	10738	0.015243	0.015243	0.001229	0.016473	0.339551	0.088067	1.30865	0.141137	NonVenom	NA
scaffold-mi7	4060894	4061226	intergenic|scaffold-mi7:4060894-4061226	intergenic	11.8986	crovir-transcript-1260	4049718	246.419	0.839315	11342	0.015243	0.015243	0.001229	0.016473	0.196001	0.050836	0.720282	0.077682	NonVenom	NA
scaffold-mi7	4580132	4580426	intergenic|scaffold-mi7:4580132-4580426	intergenic	1.71422	crovir-transcript-1293	4587546	247.044	0.64189	7267	0.094995	0.094995	0.001229	0.096224	0.164948	0.050861	0.152847	0.036872	NonVenom	NA
scaffold-mi7	4589418	4589686	intergenic|scaffold-mi7:4589418-4589686	intergenic	2.41955	crovir-transcript-1293	4587546	247.044	0.64189	2006	0.094995	0.094995	0.001229	0.096224	0.232818	0.071789	0.29866	0.072048	NonVenom	NA
scaffold-mi7	4590791	4591082	intergenic|scaffold-mi7:4590791-4591082	intergenic	4.16643	crovir-transcript-1293	4587546	247.044	0.64189	3390.5	0.089958	0.089958	0.001229	0.091187	0.379925	0.117148	0.514288	0.124065	NonVenom	NA
scaffold-mi7	4782114	4782552	intergenic|scaffold-mi7:4782114-4782552	intergenic	5.85405	crovir-transcript-1303	4784973	170.557	0.694419	2640	0.104122	0.104122	0.001229	0.105351	0.616729	0.154661	0.722601	0.113003	NonVenom	NA
scaffold-mi7	4791769	4792596	intergenic|scaffold-mi7:4791769-4792596	intergenic	18.3549	crovir-transcript-1303	4784973	170.557	0.694419	7209.5	0.024113	0.024113	0.001229	0.025342	0.465157	0.11665	1.64795	0.257711	NonVenom	NA
scaffold-mi7	4791769	4792596	intergenic|scaffold-mi7:4791769-4792596	intergenic	18.3549	crovir-transcript-1301	4810033	291.77	0.582316	17850.5	0.014612	0.014612	0.001229	0.015842	0.290772	0.079187	0.748887	0.120194	NonVenom	NA
scaffold-mi7	4801519	4802087	intergenic|scaffold-mi7:4801519-4802087	intergenic	9.33848	crovir-transcript-1301	4810033	291.77	0.582316	8230	0.018893	0.018893	0.001229	0.020123	0.187915	0.051176	0.747229	0.119928	NonVenom	NA
scaffold-mi7	4806800	4806995	intergenic|scaffold-mi7:4806800-4806995	intergenic	3.1623	crovir-transcript-1301	4810033	291.77	0.582316	3135.5	0.090072	0.090072	0.001229	0.091301	0.288721	0.078628	0.390341	0.062649	NonVenom	NA
scaffold-mi7	4818189	4819177	intergenic|scaffold-mi7:4818189-4819177	intergenic	10.2152	crovir-transcript-1301	4810033	291.77	0.582316	8650	0.074037	0.074037	0.001229	0.075266	0.768864	0.209387	0.782748	0.125629	NonVenom	NA
scaffold-mi7	4907313	4907884	intergenic|scaffold-mi7:4907313-4907884	intergenic	12.3635	crovir-transcript-1308	4901316	178.191	0.488826	6282.5	0.032308	0.032308	0.001229	0.033538	0.414643	0.180932	1.2512	0.306979	NonVenom	NA
scaffold-mi7	5085382	5085604	intergenic|scaffold-mi7:5085382-5085604	intergenic	3.84954	crovir-transcript-1322	5091107	390.912	0.718953	5614	0.02911	0.02911	0.001229	0.03034	0.116793	0.051108	0.429632	0.124331	Venom	PER40_cvt1322-vQC_2
scaffold-mi7	5095010	5095193	intergenic|scaffold-mi7:5095010-5095193	intergenic	1.52827	crovir-transcript-1322	5091107	390.912	0.718953	3994.5	0.205598	0.205598	0.001229	0.206828	0.316088	0.138318	0.188643	0.054591	Venom	PER41_cvt1322-vQC_2
scaffold-mi7	5334950	5335278	genic|scaffold-mi7:5334950-5335278	genic	3.89498	crovir-transcript-1336	5336267	244.717	0.823222	1153	0.127527	0.127527	0.001229	0.128756	0.501503	0.142395	0.480781	0.100085	NonVenom	NA
scaffold-mi7	5337511	5337896	intergenic|scaffold-mi7:5337511-5337896	intergenic	5.24305	crovir-transcript-1336	5336267	244.717	0.823222	1436.5	0.127527	0.127527	0.001229	0.128756	0.675075	0.191679	0.647181	0.134724	NonVenom	NA
scaffold-mi7	5340035	5340296	intergenic|scaffold-mi7:5340035-5340296	intergenic	3.05154	crovir-transcript-1336	5336267	244.717	0.823222	3898.5	0.105603	0.105603	0.001229	0.106833	0.326004	0.092565	0.37667	0.078412	NonVenom	NA
scaffold-mi7	5364821	5365224	genic|scaffold-mi7:5364821-5365224	genic	3.84256	crovir-transcript-1320	5368645	111.166	0.577549	3622.5	0.05787	0.05787	0.001229	0.059099	0.227093	0.0879	0.474311	0.094817	NonVenom	NA
scaffold-mi7	5605693	5606248	intergenic|scaffold-mi7:5605693-5606248	intergenic	7.69187	crovir-transcript-1339	5607811	144.946	0.64444	1840.5	0.094902	0.094902	0.001229	0.096132	0.739431	0.249745	0.949454	0.244734	NonVenom	NA
scaffold-mi7	5611179	5611457	genic|scaffold-mi7:5611179-5611457	genic	4.23959	crovir-transcript-1339	5607811	144.946	0.64444	3507	0.079213	0.079213	0.001229	0.080442	0.34104	0.115187	0.523318	0.134892	NonVenom	NA
scaffold-mi7	5868260	5868423	intergenic|scaffold-mi7:5868260-5868423	intergenic	4.52414	crovir-transcript-1364	5870104	207.51	0.989373	1762.5	0.157838	0.157838	0.001229	0.159067	0.719641	0.127573	0.558442	0.089693	NonVenom	NA
scaffold-mi7	6047360	6047845	intergenic|scaffold-mi7:6047360-6047845	intergenic	2.81037	crovir-transcript-1386	6050365	177.061	0.513026	2762.5	0.085181	0.085181	0.001229	0.08641	0.242845	0.09889	0.3469	0.096739	NonVenom	NA
scaffold-mi7	6058805	6058980	genic|scaffold-mi7:6058805-6058980	genic	4.12091	crovir-transcript-1386	6050365	177.061	0.513026	8527.5	0.083633	0.083633	0.001229	0.084862	0.349707	0.142406	0.319709	0.089156	NonVenom	NA
scaffold-mi7	7718660	7719152	intergenic|scaffold-mi7:7718660-7719152	intergenic	21.6238	crovir-transcript-1435	7721292	15278.4	0.854679	2386	0.018388	0.018388	0.001229	0.019617	0.424195	0.138413	2.66916	0.45134	NonVenom	NA
scaffold-mi7	7718660	7719152	intergenic|scaffold-mi7:7718660-7719152	intergenic	21.6238	crovir-transcript-1450	7794031	3639.03	0.630534	75125	0.003593	0.003593	0.001229	0.004823	0.104284	0.055327	0.252706	0.094616	NonVenom	NA
scaffold-mi7	7727087	7727927	genic|scaffold-mi7:7727087-7727927	genic	4.23033	crovir-transcript-1435	7721292	15278.4	0.854679	6215	0.145845	0.145845	0.001229	0.147074	0.622174	0.203013	0.432157	0.073075	NonVenom	NA
scaffold-mi7	7728174	7728480	genic|scaffold-mi7:7728174-7728480	genic	2.75686	crovir-transcript-1435	7721292	15278.4	0.854679	7035	0.145845	0.145845	0.001229	0.147074	0.405464	0.132301	0.25285	0.042756	NonVenom	NA
scaffold-mi7	8192390	8192696	intergenic|scaffold-mi7:8192390-8192696	intergenic	9.47466	crovir-transcript-1455	8029586	109.741	0.78381	162957	0.009735	0.009735	0.001229	0.010964	0.103882	0.050476	0.056452	0.017366	NonVenom	NA
scaffold-mi7	8762496	8762874	genic|scaffold-mi7:8762496-8762874	genic	2.42203	crovir-transcript-1498	8761691	225.899	0.767414	994	0.075932	0.075932	0.001229	0.077161	0.186885	0.090537	0.298965	0.101572	NonVenom	NA
scaffold-mi7	8772567	8772813	genic|scaffold-mi7:8772567-8772813	genic	11.3804	crovir-transcript-1498	8761691	225.899	0.767414	10999	0.011216	0.011216	0.001229	0.012445	0.141625	0.068611	0.707565	0.240392	NonVenom	NA
scaffold-mi7	10743527	10743783	intergenic|scaffold-mi7:10743527-10743783	intergenic	2.2661	crovir-transcript-1574	10746586	139.509	0.411672	2931	0.111648	0.111648	0.001229	0.112877	0.25579	0.154865	0.279718	0.096555	NonVenom	NA
scaffold-mi7	10880760	10880944	intergenic|scaffold-mi7:10880760-10880944	intergenic	2.79503	crovir-transcript-1590	10878828	103.52	0.530728	2024	0.058805	0.058805	0.001229	0.060035	0.167798	0.09748	0.345007	0.148266	NonVenom	NA
scaffold-mi7	11085051	11085367	intergenic|scaffold-mi7:11085051-11085367	intergenic	11.4476	crovir-transcript-1590	10878828	103.52	0.530728	206381	0.007306	0.007306	0.001229	0.008535	0.097707	0.056761	0.055535	0.023866	NonVenom	NA
scaffold-mi7	11089361	11089950	intergenic|scaffold-mi7:11089361-11089950	intergenic	14.054	crovir-transcript-1590	10878828	103.52	0.530728	210828	0.007306	0.007306	0.001229	0.008535	0.119953	0.069685	0.066927	0.028762	NonVenom	NA
scaffold-mi7	11193570	11194431	genic|scaffold-mi7:11193570-11194431	genic	22.1052	crovir-transcript-1590	10878828	103.52	0.530728	315172	0.002773	0.002773	0.001229	0.004002	0.088471	0.051396	0.074195	0.031885	NonVenom	NA
scaffold-mi7	11972914	11973145	genic|scaffold-mi7:11972914-11973145	genic	16.6736	crovir-transcript-1620	11945875	102.563	0.794741	27154.5	0.012443	0.012443	0.001229	0.013672	0.227965	0.098128	0.472275	0.105497	NonVenom	NA
scaffold-mi7	12013263	12014242	genic|scaffold-mi7:12013263-12014242	genic	17.5545	crovir-transcript-1679	12029467	101.77	0.773669	15714.5	0.018556	0.018556	0.001229	0.019785	0.34732	0.169712	0.800209	0.168169	NonVenom	NA
scaffold-mi7	12013263	12014242	genic|scaffold-mi7:12013263-12014242	genic	17.5545	crovir-transcript-1665	12054630	121.394	0.659076	40877.5	0.005275	0.005275	0.001229	0.006504	0.114171	0.074436	0.348344	0.070463	NonVenom	NA
scaffold-mi7	12013263	12014242	genic|scaffold-mi7:12013263-12014242	genic	17.5545	crovir-transcript-1671	12082154	136.738	0.732252	68401.5	0.01276	0.01276	0.001229	0.01399	0.245578	0.111933	0.222585	0.05041	NonVenom	NA
scaffold-mi7	12048980	12049250	intergenic|scaffold-mi7:12048980-12049250	intergenic	6.47456	crovir-transcript-1665	12054630	121.394	0.659076	5515	0.027177	0.027177	0.001229	0.028406	0.183915	0.119906	0.733869	0.148447	NonVenom	NA
scaffold-mi5	460390	460722	genic|scaffold-mi5:460390-460722	genic	2.71723	crovir-transcript-286	468841	146.804	0.942673	8285	0.102791	0.102791	0.001229	0.10402	0.282648	0.090888	0.216167	0.055663	NonVenom	NA
scaffold-mi5	466412	466553	genic|scaffold-mi5:466412-466553	genic	1.94605	crovir-transcript-286	468841	146.804	0.942673	2358.5	0.102791	0.102791	0.001229	0.10402	0.202428	0.065093	0.240212	0.061855	NonVenom	NA
scaffold-mi5	466412	466553	genic|scaffold-mi5:466412-466553	genic	1.94605	crovir-transcript-282	470282	245.212	0.523198	3799.5	0.040383	0.040383	0.001229	0.041612	0.080979	0.056848	0.240212	0.062329	NonVenom	NA
scaffold-mi5	1404432	1405071	intergenic|scaffold-mi5:1404432-1405071	intergenic	10.0061	crovir-transcript-309	1402179	2479.87	0.418929	2572.5	0.023526	0.023526	0.001229	0.024755	0.247703	0.29239	1.23511	0.562457	NonVenom	NA
scaffold-mi5	1909705	1910529	intergenic|scaffold-mi5:1909705-1910529	intergenic	15.5734	crovir-transcript-394	3671920	113.328	0.739783	1761803	0.002595	0.002595	0.000751	0.003346	0.052113	0.053935	0.011696	0.00955	NonVenom	NA
scaffold-mi5	1928947	1929406	intergenic|scaffold-mi5:1928947-1929406	intergenic	3.28447	crovir-transcript-315	1945273	120.621	0.645169	16096.5	0.029187	0.029187	0.001229	0.030416	0.099901	0.05798	0.146624	0.039424	NonVenom	NA
scaffold-mi5	1940673	1941123	genic|scaffold-mi5:1940673-1941123	genic	4.19883	crovir-transcript-315	1945273	120.621	0.645169	4375	0.022331	0.022331	0.001229	0.02356	0.098926	0.057414	0.518287	0.139357	NonVenom	NA
scaffold-mi5	1944306	1944705	intergenic|scaffold-mi5:1944306-1944705	intergenic	3.74144	crovir-transcript-315	1945273	120.621	0.645169	767.5	0.022331	0.022331	0.001229	0.02356	0.08815	0.05116	0.461828	0.124177	NonVenom	NA
scaffold-mi5	1963070	1963389	genic|scaffold-mi5:1963070-1963389	genic	3.73192	crovir-transcript-315	1945273	120.621	0.645169	17956.5	0.025036	0.025036	0.001229	0.026265	0.098021	0.056889	0.151482	0.040731	NonVenom	NA
scaffold-mi5	1963988	1964543	genic|scaffold-mi5:1963988-1964543	genic	8.24285	crovir-transcript-315	1945273	120.621	0.645169	18992.5	0.025036	0.025036	0.001229	0.026265	0.216502	0.125652	0.318649	0.085679	NonVenom	NA
scaffold-mi5	2029263	2029752	intergenic|scaffold-mi5:2029263-2029752	intergenic	7.88975	crovir-transcript-320	2039650	785.749	0.799174	10142.5	0.019583	0.019583	0.001229	0.020812	0.164204	0.050928	0.526382	0.095766	NonVenom	NA
scaffold-mi5	2030658	2031297	intergenic|scaffold-mi5:2030658-2031297	intergenic	8.69426	crovir-transcript-320	2039650	785.749	0.799174	8672.5	0.058567	0.058567	0.001229	0.059796	0.51988	0.161242	0.664699	0.12093	NonVenom	NA
scaffold-mi5	2033376	2033738	intergenic|scaffold-mi5:2033376-2033738	intergenic	2.86299	crovir-transcript-320	2039650	785.749	0.799174	6093	0.058567	0.058567	0.001229	0.059796	0.171195	0.053096	0.297561	0.054136	NonVenom	NA
scaffold-mi5	2036061	2036228	intergenic|scaffold-mi5:2036061-2036228	intergenic	1.82651	crovir-transcript-320	2039650	785.749	0.799174	3505.5	0.107472	0.107472	0.001229	0.108701	0.198544	0.061579	0.225458	0.041018	NonVenom	NA
scaffold-mi5	2042387	2042674	intergenic|scaffold-mi5:2042387-2042674	intergenic	8.62592	crovir-transcript-320	2039650	785.749	0.799174	2880.5	0.107472	0.107472	0.001229	0.108701	0.937647	0.290814	1.06475	0.193711	NonVenom	NA
scaffold-mi5	2045357	2045855	intergenic|scaffold-mi5:2045357-2045855	intergenic	8.94992	crovir-transcript-320	2039650	785.749	0.799174	5956	0.034047	0.034047	0.001229	0.035276	0.31572	0.097921	0.948782	0.172613	NonVenom	NA
scaffold-mi5	2534571	2534828	intergenic|scaffold-mi5:2534571-2534828	intergenic	3.1245	crovir-transcript-341	2525455	612.156	0.844477	9244.5	0.143843	0.143843	0.001229	0.145072	0.453277	0.241833	0.225966	0.115874	NonVenom	NA
scaffold-mi5	2534571	2534828	intergenic|scaffold-mi5:2534571-2534828	intergenic	3.1245	crovir-transcript-339	2540346	167.824	0.632781	5646.5	0.022477	0.022477	0.001229	0.023706	0.074069	0.07282	0.346966	0.20846	NonVenom	NA
scaffold-mi5	2696995	2697092	intergenic|scaffold-mi5:2696995-2697092	intergenic	0.786246	crovir-transcript-364	2696410	281.918	0.781381	633.5	0.074533	0.074533	0.001229	0.075762	0.059568	0.050726	0.097051	0.059515	NonVenom	NA
scaffold-mi5	2735783	2736193	genic|scaffold-mi5:2735783-2736193	genic	3.96413	crovir-transcript-364	2696410	281.918	0.781381	39578	0.01539	0.01539	0.001229	0.016619	0.065879	0.0561	0.080905	0.049614	NonVenom	NA
scaffold-mi5	2827234	2828469	intergenic|scaffold-mi5:2827234-2828469	intergenic	7.61103	crovir-transcript-364	2696410	281.918	0.781381	131442	0.007297	0.007297	0.001229	0.008526	0.064892	0.05526	0.054672	0.033527	NonVenom	NA
scaffold-mi5	3304279	3304556	genic|scaffold-mi5:3304279-3304556	genic	1.13836	crovir-transcript-385	3301056	159.271	0.535495	3361.5	0.129857	0.129857	0.001229	0.131086	0.149223	0.156231	0.140515	0.091164	NonVenom	NA
scaffold-mi5	3338100	3338638	genic|scaffold-mi5:3338100-3338638	genic	8.633	crovir-transcript-385	3301056	159.271	0.535495	37313	0.004503	0.004503	0.001229	0.005732	0.049485	0.051809	0.185462	0.120325	NonVenom	NA
scaffold-mi5	3443684	3444083	intergenic|scaffold-mi5:3443684-3444083	intergenic	6.78261	crovir-transcript-394	3671920	113.328	0.739783	228036	0.006075	0.006075	0.001229	0.007304	0.04954	0.051273	0.030168	0.024634	NonVenom	NA
scaffold-mi5	3826566	3826925	genic|scaffold-mi5:3826566-3826925	genic	6.09812	crovir-transcript-389	3827644	138.167	0.914496	898.5	0.073504	0.073504	0.001229	0.074733	0.45573	0.389622	0.752728	0.338502	NonVenom	NA
scaffold-mi5	3900312	3900922	genic|scaffold-mi5:3900312-3900922	genic	6.44443	crovir-transcript-402	3920688	214.01	0.630169	20071	0.013655	0.013655	0.001229	0.014884	0.09592	0.083537	0.237439	0.104065	NonVenom	NA
scaffold-mi5	3923286	3923513	intergenic|scaffold-mi5:3923286-3923513	intergenic	2.08935	crovir-transcript-402	3920688	214.01	0.630169	2711.5	0.035218	0.035218	0.001229	0.036447	0.076151	0.06632	0.257901	0.113033	NonVenom	NA
scaffold-mi5	3925442	3925916	intergenic|scaffold-mi5:3925442-3925916	intergenic	6.49713	crovir-transcript-402	3920688	214.01	0.630169	4991	0.035218	0.035218	0.001229	0.036447	0.236802	0.206232	0.80198	0.351492	NonVenom	NA
scaffold-mi5	4834827	4835194	intergenic|scaffold-mi5:4834827-4835194	intergenic	3.20157	crovir-transcript-428	4841509	783.472	0.680513	6498.5	0.056226	0.056226	0.001229	0.057456	0.183948	0.138066	0.314615	0.194906	NonVenom	NA
scaffold-mi5	4844876	4845053	intergenic|scaffold-mi5:4844876-4845053	intergenic	1.55206	crovir-transcript-428	4841509	783.472	0.680513	3455.5	0.138147	0.138147	0.001229	0.139377	0.21632	0.162363	0.19158	0.118685	NonVenom	NA
scaffold-mi5	4845401	4845656	intergenic|scaffold-mi5:4845401-4845656	intergenic	1.45792	crovir-transcript-428	4841509	783.472	0.680513	4019.5	0.138147	0.138147	0.001229	0.139377	0.203201	0.152516	0.179961	0.111487	NonVenom	NA
scaffold-mi5	5957287	5957614	intergenic|scaffold-mi5:5957287-5957614	intergenic	2.08457	crovir-transcript-443	5959774	168.857	0.606304	2323.5	0.113911	0.113911	0.001229	0.115141	0.240018	0.269974	0.257311	0.174164	NonVenom	NA
scaffold-mi5	5977587	5977969	intergenic|scaffold-mi5:5977587-5977969	intergenic	5.64508	crovir-transcript-443	5959774	168.857	0.606304	18004	0.00936	0.00936	0.001229	0.010589	0.059774	0.067235	0.228612	0.154739	NonVenom	NA
scaffold-mi5	5977587	5977969	intergenic|scaffold-mi5:5977587-5977969	intergenic	5.64508	crovir-transcript-457	5976423	2695.95	0.716099	1355	0.094209	0.094209	0.001229	0.095438	0.538753	0.343121	0.696806	0.342239	NonVenom	NA
scaffold-mi5	5982236	5982506	intergenic|scaffold-mi5:5982236-5982506	intergenic	3.93953	crovir-transcript-457	5976423	2695.95	0.716099	5948	0.066587	0.066587	0.001229	0.067817	0.267165	0.170152	0.418118	0.205361	NonVenom	NA
scaffold-mi5	6409014	6409498	intergenic|scaffold-mi5:6409014-6409498	intergenic	4.19464	crovir-transcript-465	6435764	154.509	0.801178	26508	0.020936	0.020936	0.001229	0.022165	0.092973	0.071135	0.121329	0.054221	NonVenom	NA
scaffold-mi5	6436629	6436870	intergenic|scaffold-mi5:6436629-6436870	intergenic	3.07068	crovir-transcript-465	6435764	154.509	0.801178	985.5	0.055886	0.055886	0.001229	0.057115	0.175382	0.134187	0.379033	0.169386	NonVenom	NA
scaffold-mi5	6539191	6539916	intergenic|scaffold-mi5:6539191-6539916	intergenic	12.0356	crovir-transcript-465	6435764	154.509	0.801178	103790	0.005143	0.005143	0.001229	0.006372	0.07669	0.058677	0.106177	0.04745	NonVenom	NA
scaffold-mi5	7961595	7962032	intergenic|scaffold-mi5:7961595-7962032	intergenic	6.46051	crovir-transcript-496	7916699	141.015	0.257424	45114.5	0.005202	0.005202	0.001229	0.006431	0.041546	0.077693	0.117659	0.132397	NonVenom	NA
scaffold-mi5	7963060	7963632	intergenic|scaffold-mi5:7963060-7963632	intergenic	5.9592	crovir-transcript-496	7916699	141.015	0.257424	46647	0.005202	0.005202	0.001229	0.006431	0.038323	0.071664	0.10542	0.118625	NonVenom	NA
scaffold-mi5	8656659	8657425	genic|scaffold-mi5:8656659-8657425	genic	12.8136	crovir-transcript-509	8670570	111.698	0.845388	13528	0.003294	0.003294	0.001229	0.004523	0.057958	0.062634	0.665411	0.268146	NonVenom	NA
scaffold-mi5	8656659	8657425	genic|scaffold-mi5:8656659-8657425	genic	12.8136	crovir-transcript-521	8753146	134.215	0.309437	96104	0.007285	0.007285	0.001229	0.008514	0.109095	0.196482	0.120865	0.140815	NonVenom	NA
scaffold-mi5	8663797	8664323	genic|scaffold-mi5:8663797-8664323	genic	5.33965	crovir-transcript-509	8670570	111.698	0.845388	6510	0.013897	0.013897	0.001229	0.015126	0.080768	0.087284	0.523915	0.211126	NonVenom	NA
scaffold-mi5	9679682	9680110	genic|scaffold-mi5:9679682-9680110	genic	2.51873	crovir-transcript-543	9684017	528.983	0.678205	4121	0.085891	0.085891	0.001229	0.08712	0.219431	0.160308	0.310902	0.07238	NonVenom	NA
scaffold-mi5	9685380	9686217	intergenic|scaffold-mi5:9685380-9686217	intergenic	24.0488	crovir-transcript-521	8753146	134.215	0.309437	932652	0	0	0.001229	0.001229	0.029561	0.05324	0.031409	0.036593	NonVenom	NA
scaffold-mi5	9685380	9686217	intergenic|scaffold-mi5:9685380-9686217	intergenic	24.0488	crovir-transcript-515	8848208	105.592	0.56592	837590	0	0	0.001229	0.001229	0.029561	0.052742	0.034489	0.041976	NonVenom	NA
scaffold-mi5	9685380	9686217	intergenic|scaffold-mi5:9685380-9686217	intergenic	24.0488	crovir-transcript-543	9684017	528.983	0.678205	1781.5	0.021493	0.021493	0.001229	0.022722	0.546447	0.399213	2.96849	0.691082	NonVenom	NA
scaffold-mi5	9824464	9825109	genic|scaffold-mi5:9824464-9825109	genic	20.8484	crovir-transcript-543	9684017	528.983	0.678205	140770	0.00309	0.00309	0.001229	0.004319	0.090039	0.065779	0.141088	0.032846	NonVenom	NA
scaffold-mi5	10854917	10855911	intergenic|scaffold-mi5:10854917-10855911	intergenic	10.1527	crovir-transcript-563	10862234	3980.2	0.658651	6820	0.030651	0.030651	0.001229	0.031881	0.323674	0.265473	0.956656	0.359928	NonVenom	NA
scaffold-mi5	10857213	10857506	intergenic|scaffold-mi5:10857213-10857506	intergenic	3.29747	crovir-transcript-563	10862234	3980.2	0.658651	4874.5	0.030651	0.030651	0.001229	0.031881	0.105125	0.086222	0.407027	0.153138	NonVenom	NA
scaffold-mi5	10864208	10864719	intergenic|scaffold-mi5:10864208-10864719	intergenic	6.74308	crovir-transcript-563	10862234	3980.2	0.658651	2229.5	0.063742	0.063742	0.001229	0.064971	0.438102	0.359326	0.832339	0.313156	NonVenom	NA
scaffold-mi5	11649503	11650063	intergenic|scaffold-mi5:11649503-11650063	intergenic	24.2445	crovir-transcript-564	11650747	24359.8	0.976256	964	0.177849	0.177849	0.001229	0.179078	4.34164	0.46699	2.99264	0.460968	Venom	PER33_cvt564-CTL
scaffold-mi5	11649503	11650063	intergenic|scaffold-mi5:11649503-11650063	intergenic	24.2445	crovir-transcript-570	13568340	105.561	0.321886	1918557	0	0	0.000697	0.000697	0.016906	0.055862	0.016906	0.038875	NonVenom	PER33_cvt564-CTL
scaffold-mi5	11652675	11652931	genic|scaffold-mi5:11652675-11652931	genic	3.13146	crovir-transcript-564	11650747	24359.8	0.976256	2056	0.177849	0.177849	0.001229	0.179078	0.560774	0.060317	0.386535	0.059539	Venom	PER34_cvt564-CTL
scaffold-mi5	11653028	11653637	genic|scaffold-mi5:11653028-11653637	genic	6.33519	crovir-transcript-564	11650747	24359.8	0.976256	2585.5	0.177849	0.177849	0.001229	0.179078	1.13449	0.122027	0.781991	0.120453	Venom	PER35_cvt564-CTL
scaffold-mi2	319758	320597	genic|scaffold-mi2:319758-320597	genic	11.8542	crovir-transcript-592	335857	150.567	0.603267	15679.5	0.007507	0.007507	0.001229	0.008736	0.103557	0.084663	0.541416	0.179776	NonVenom	NA
scaffold-mi2	333915	334419	intergenic|scaffold-mi2:333915-334419	intergenic	7.64973	crovir-transcript-592	335857	150.567	0.603267	1690	0.059317	0.059317	0.001229	0.060546	0.46316	0.378658	0.944252	0.313536	NonVenom	NA
scaffold-mi2	456299	456863	genic|scaffold-mi2:456299-456863	genic	5.02029	crovir-transcript-588	451213	244.763	0.744216	5368	0.037333	0.037333	0.001229	0.038562	0.193593	0.177841	0.582563	0.249434	NonVenom	NA
scaffold-mi2	456299	456863	genic|scaffold-mi2:456299-456863	genic	5.02029	crovir-transcript-594	476593	174.984	0.719621	20012	0.012846	0.012846	0.001229	0.014075	0.070661	0.052564	0.185442	0.066994	NonVenom	NA
scaffold-mi2	477995	478186	intergenic|scaffold-mi2:477995-478186	intergenic	2.06551	crovir-transcript-594	476593	174.984	0.719621	1497.5	0.080512	0.080512	0.001229	0.081742	0.168838	0.125597	0.254958	0.092108	NonVenom	NA
scaffold-mi2	487284	487697	intergenic|scaffold-mi2:487284-487697	intergenic	3.45474	crovir-transcript-594	476593	174.984	0.719621	10897.5	0.025488	0.025488	0.001229	0.026717	0.092301	0.068661	0.216535	0.078227	NonVenom	NA
scaffold-mi2	494006	494449	intergenic|scaffold-mi2:494006-494449	intergenic	3.88201	crovir-transcript-594	476593	174.984	0.719621	17634.5	0.018844	0.018844	0.001229	0.020073	0.077923	0.057966	0.160074	0.05783	NonVenom	NA
scaffold-mi2	507060	507394	intergenic|scaffold-mi2:507060-507394	intergenic	5.18218	crovir-transcript-588	451213	244.763	0.744216	56014	0.009508	0.009508	0.001229	0.010737	0.055641	0.051114	0.078182	0.033475	NonVenom	NA
scaffold-mi2	575646	576437	intergenic|scaffold-mi2:575646-576437	intergenic	9.97116	crovir-transcript-622	1184197	125.476	0.731645	608156	0.0041	0.0041	0.001229	0.005329	0.05314	0.056081	0.018892	0.010205	NonVenom	NA
scaffold-mi2	1184920	1185109	intergenic|scaffold-mi2:1184920-1185109	intergenic	3.29637	crovir-transcript-622	1184197	125.476	0.731645	817.5	0.02934	0.02934	0.001229	0.030569	0.100767	0.106345	0.406891	0.219801	NonVenom	NA
scaffold-mi2	1685534	1685763	intergenic|scaffold-mi2:1685534-1685763	intergenic	4.0976	crovir-transcript-627	1696845	438.913	0.933928	11196.5	0.024008	0.024008	0.001229	0.025237	0.10341	0.058427	0.250851	0.076001	NonVenom	NA
scaffold-mi2	1690917	1691292	intergenic|scaffold-mi2:1690917-1691292	intergenic	2.7011	crovir-transcript-627	1696845	438.913	0.933928	5740.5	0.077792	0.077792	0.001229	0.079022	0.213445	0.120598	0.295672	0.08958	NonVenom	NA
scaffold-mi2	1699051	1699326	genic|scaffold-mi2:1699051-1699326	genic	2.48151	crovir-transcript-627	1696845	438.913	0.933928	2343.5	0.077792	0.077792	0.001229	0.079022	0.196093	0.110794	0.306308	0.092803	NonVenom	NA
scaffold-mi2	2931205	2931692	intergenic|scaffold-mi2:2931205-2931692	intergenic	46.8922	crovir-transcript-619	1337267	200.608	0.518461	1.59418e+06	0	0	0.000819	0.000819	0.038416	0.051391	0.038416	0.025285	NonVenom	NA
scaffold-mi2	2931205	2931692	intergenic|scaffold-mi2:2931205-2931692	intergenic	46.8922	crovir-transcript-650	2694082	218.334	0.800206	237366	0	0	0.001229	0.001229	0.05764	0.059627	0.201421	0.152708	NonVenom	NA
scaffold-mi2	5004336	5004839	intergenic|scaffold-mi2:5004336-5004839	intergenic	7.55381	crovir-transcript-669	5008791	154.009	0.567499	4203.5	0.016142	0.016142	0.001229	0.017371	0.131218	0.137987	0.932412	0.484836	NonVenom	NA
scaffold-mi2	5518748	5519112	intergenic|scaffold-mi2:5518748-5519112	intergenic	3.51723	crovir-transcript-693	5514255	582.999	0.752353	4675	0.077533	0.077533	0.001229	0.078762	0.277023	0.169562	0.434153	0.17573	NonVenom	NA
scaffold-mi2	6101400	6101798	intergenic|scaffold-mi2:6101400-6101798	intergenic	8.00209	crovir-transcript-713	6207377	126.022	0.728001	105778	0.009643	0.009643	0.001229	0.010872	0.086998	0.060549	0.069438	0.029569	NonVenom	NA
scaffold-mi2	6226282	6226891	intergenic|scaffold-mi2:6226282-6226891	intergenic	17.572	crovir-transcript-713	6207377	126.022	0.728001	19209.5	0.007816	0.007816	0.001229	0.009045	0.158938	0.110618	0.67261	0.286423	NonVenom	NA
scaffold-mi2	8535550	8536059	intergenic|scaffold-mi2:8535550-8536059	intergenic	32.4226	crovir-transcript-810	8533267	172.467	0.924941	2537.5	0.105141	0.105141	0.001229	0.106371	3.44881	0.502921	4.00211	0.346455	NonVenom	PER16_SVSP_2
scaffold-mi2	8535550	8536059	intergenic|scaffold-mi2:8535550-8536059	intergenic	32.4226	crovir-transcript-808	8546069	372.766	0.959009	10264.5	0.020409	0.020409	0.001229	0.021638	0.701575	0.098554	2.14076	0.153501	NonVenom	PER16_SVSP_2
scaffold-mi2	8535550	8536059	intergenic|scaffold-mi2:8535550-8536059	intergenic	32.4226	crovir-transcript-SVSP_2	8587690	113.169	0.884436	51885.5	0.004716	0.004716	0.001229	0.005946	0.19277	0.063474	0.522844	0.074632	Venom	PER16_SVSP_2
scaffold-mi2	8540458	8540782	intergenic|scaffold-mi2:8540458-8540782	intergenic	9.07559	crovir-transcript-808	8546069	372.766	0.959009	5449	0.155186	0.155186	0.001229	0.156415	1.41956	0.199413	1.03952	0.074538	NonVenom	NA
scaffold-mi2	8549923	8550591	intergenic|scaffold-mi2:8549923-8550591	intergenic	18.8076	crovir-transcript-808	8546069	372.766	0.959009	4188	0.019819	0.019819	0.001229	0.021048	0.395858	0.055608	2.32154	0.166464	NonVenom	PER17_SVSP_2
scaffold-mi2	8549923	8550591	intergenic|scaffold-mi2:8549923-8550591	intergenic	18.8076	crovir-transcript-SVSP_2	8587690	113.169	0.884436	37433	0.007851	0.007851	0.001229	0.00908	0.170779	0.056233	0.402915	0.057513	Venom	PER17_SVSP_2
scaffold-mi2	8553709	8554523	intergenic|scaffold-mi2:8553709-8554523	intergenic	30.8188	crovir-transcript-810	8533267	172.467	0.924941	20849	0.010608	0.010608	0.001229	0.011837	0.364796	0.053196	1.09854	0.095098	NonVenom	PER18_SVSP_1.SVSP_2
scaffold-mi2	8553709	8554523	intergenic|scaffold-mi2:8553709-8554523	intergenic	30.8188	crovir-transcript-808	8546069	372.766	0.959009	8047	0.019819	0.019819	0.001229	0.021048	0.648667	0.091122	2.51472	0.180316	NonVenom	PER18_SVSP_1.SVSP_2
scaffold-mi2	8553709	8554523	intergenic|scaffold-mi2:8553709-8554523	intergenic	30.8188	crovir-transcript-SVSP_1	8569409	1042.37	0.744762	15293	0.002553	0.002553	0.001229	0.003782	0.116558	0.053511	1.43848	0.177551	Venom	PER18_SVSP_1.SVSP_2
scaffold-mi2	8553709	8554523	intergenic|scaffold-mi2:8553709-8554523	intergenic	30.8188	crovir-transcript-SVSP_2	8587690	113.169	0.884436	33574	0.007851	0.007851	0.001229	0.00908	0.279845	0.092146	0.725778	0.103599	Venom	PER18_SVSP_1.SVSP_2
scaffold-mi2	8560973	8561209	intergenic|scaffold-mi2:8560973-8561209	intergenic	2.01573	crovir-transcript-SVSP_1	8569409	1042.37	0.744762	8318	0.114913	0.114913	0.001229	0.116143	0.234112	0.10748	0.159806	0.019725	Venom	PER19_SVSP_1
scaffold-mi2	8735648	8735968	intergenic|scaffold-mi2:8735648-8735968	intergenic	16.3604	crovir-transcript-SVSP_2	8587690	113.169	0.884436	148118	0.009961	0.009961	0.001229	0.01119	0.183073	0.060281	0.105921	0.015119	Venom	PER20_SVSP_2.SVSP_5
scaffold-mi2	8735648	8735968	intergenic|scaffold-mi2:8735648-8735968	intergenic	16.3604	crovir-transcript-SVSP_5	8739579	11807	0.931985	3771	0.046135	0.046135	0.001229	0.047364	0.774891	0.189901	2.01946	0.159294	Venom	PER20_SVSP_2.SVSP_5
scaffold-mi2	8737083	8737692	intergenic|scaffold-mi2:8737083-8737692	intergenic	12.5993	crovir-transcript-SVSP_5	8739579	11807	0.931985	2191.5	0.046135	0.046135	0.001229	0.047364	0.596752	0.146245	1.55521	0.122674	Venom	PER21_SVSP_5
scaffold-mi2	8747448	8748402	intergenic|scaffold-mi2:8747448-8748402	intergenic	12.2415	crovir-transcript-SVSP_6	8751459	244.846	0.982693	3534	0.038424	0.038424	0.001229	0.039653	0.485415	0.071781	1.51104	0.123472	Venom	PER22_SVSP_6
scaffold-mi2	8753465	8753893	genic|scaffold-mi2:8753465-8753893	genic	7.03699	crovir-transcript-SVSP_6	8751459	244.846	0.982693	2220	0.187488	0.187488	0.001229	0.188717	1.328	0.196379	0.868618	0.070977	Venom	PER23_SVSP_6
scaffold-mi2	8799161	8799340	intergenic|scaffold-mi2:8799161-8799340	intergenic	10.8261	crovir-transcript-SVSP_11	8796858	5123.57	0.869436	2392.5	0.07087	0.07087	0.001229	0.0721	0.780557	0.126951	1.33633	0.111273	Venom	PER24_SVSP_11
scaffold-mi2	8811504	8814056	intergenic|scaffold-mi2:8811504-8814056	intergenic	28.5347	crovir-transcript-SVSP_11	8796858	5123.57	0.869436	15922	0.025662	0.025662	0.001229	0.026891	0.767335	0.1248	1.28598	0.10708	Venom	PER25_SVSP_11.SVSP_8
scaffold-mi2	8811504	8814056	intergenic|scaffold-mi2:8811504-8814056	intergenic	28.5347	crovir-transcript-SVSP_8	8947861	586.926	0.945831	135081	0.012514	0.012514	0.001229	0.013744	0.392168	0.161822	0.200159	0.023055	Venom	PER25_SVSP_11.SVSP_8
scaffold-mi2	8828181	8829001	intergenic|scaffold-mi2:8828181-8829001	intergenic	62.6333	crovir-transcript-SVSP_4	8663500	1397.5	0.8013	165091	0.005894	0.005894	0.001229	0.007123	0.446148	0.15096	0.368982	0.061661	Venom	PER26_SVSP_4.SVSP_11.SVSP_7
scaffold-mi2	8828181	8829001	intergenic|scaffold-mi2:8828181-8829001	intergenic	62.6333	crovir-transcript-SVSP_11	8796858	5123.57	0.869436	31733	0.004092	0.004092	0.001229	0.005321	0.333283	0.054206	1.54917	0.128996	Venom	PER26_SVSP_4.SVSP_11.SVSP_7
scaffold-mi2	8828181	8829001	intergenic|scaffold-mi2:8828181-8829001	intergenic	62.6333	crovir-transcript-SVSP_7	8879458	6833.27	0.973462	50867	0.010487	0.010487	0.001229	0.011716	0.733804	0.157592	1.02759	0.063709	Venom	PER26_SVSP_4.SVSP_11.SVSP_7
scaffold-mi2	8848793	8849061	intergenic|scaffold-mi2:8848793-8849061	intergenic	5.62305	crovir-transcript-SVSP_11	8796858	5123.57	0.869436	52069	0.080631	0.080631	0.001229	0.08186	0.460305	0.074865	0.090399	0.007527	Venom	PER27_SVSP_11
scaffold-mi2	8849320	8849765	intergenic|scaffold-mi2:8849320-8849765	intergenic	6.98794	crovir-transcript-SVSP_11	8796858	5123.57	0.869436	52684.5	0.080631	0.080631	0.001229	0.08186	0.572035	0.093037	0.111199	0.009259	Venom	PER28_SVSP_11
scaffold-mi2	8852480	8852858	intergenic|scaffold-mi2:8852480-8852858	intergenic	10.6007	crovir-transcript-834	8988560	305.747	0.740694	135891	0.014271	0.014271	0.001229	0.0155	0.164315	0.054659	0.073974	0.009482	NonVenom	NA
scaffold-mi2	8859367	8861214	intergenic|scaffold-mi2:8859367-8861214	intergenic	20.4143	crovir-transcript-SVSP_9	8981362	865.527	0.501306	121072	0.008605	0.008605	0.001229	0.009834	0.200749	0.080298	0.15751	0.022814	Venom	PER29_SVSP_9
scaffold-mi2	8859367	8861214	intergenic|scaffold-mi2:8859367-8861214	intergenic	20.4143	crovir-transcript-834	8988560	305.747	0.740694	128270	0.00718	0.00718	0.001229	0.008409	0.171659	0.057102	0.149791	0.0192	NonVenom	PER29_SVSP_9
scaffold-mi2	8881756	8883291	intergenic|scaffold-mi2:8881756-8883291	intergenic	20.9786	crovir-transcript-SVSP_7	8879458	6833.27	0.973462	3065.5	0.039407	0.039407	0.001229	0.040636	0.85249	0.183081	2.58952	0.160546	Venom	PER30_SVSP_7
scaffold-mi2	8884153	8884833	intergenic|scaffold-mi2:8884153-8884833	intergenic	7.31519	crovir-transcript-SVSP_7	8879458	6833.27	0.973462	5035	0.039407	0.039407	0.001229	0.040636	0.297261	0.06384	0.897496	0.055643	Venom	PER31_SVSP_7
scaffold-mi2	8899216	8899457	intergenic|scaffold-mi2:8899216-8899457	intergenic	13.8185	crovir-transcript-SVSP_9	8981362	865.527	0.501306	82025.5	0.010225	0.010225	0.001229	0.011454	0.15828	0.063311	0.149604	0.021669	Venom	PER32_SVSP_9
scaffold-mi2	8990670	8991238	intergenic|scaffold-mi2:8990670-8991238	intergenic	12.9736	crovir-transcript-834	8988560	305.747	0.740694	2394	0.01554	0.01554	0.001229	0.016769	0.217553	0.072369	1.60142	0.205264	NonVenom	NA
scaffold-mi2	10035032	10035999	intergenic|scaffold-mi2:10035032-10035999	intergenic	10.0275	crovir-transcript-860	10056794	199.38	0.872169	21278.5	0.016466	0.016466	0.001229	0.017695	0.177438	0.056601	0.351147	0.077799	NonVenom	NA
scaffold-mi2	10130344	10131112	intergenic|scaffold-mi2:10130344-10131112	intergenic	18.9502	crovir-transcript-860	10056794	199.38	0.872169	73934	0.016632	0.016632	0.001229	0.017861	0.338471	0.10797	0.224562	0.049753	NonVenom	NA
scaffold-mi2	10701647	10701927	intergenic|scaffold-mi2:10701647-10701927	intergenic	6.43232	crovir-transcript-879	10707311	453.345	0.794498	5524	0.062893	0.062893	0.001229	0.064122	0.412451	0.107265	0.728048	0.121035	NonVenom	NA
scaffold-mi2	14940724	14941101	intergenic|scaffold-mi2:14940724-14941101	intergenic	6.23295	crovir-transcript-914	14943183		0.400923	2270.5	0.207795	0.207795	0.001229	0.209024	1.30284	0.504821	0.769371	0.289266	NonVenom	NA
scaffold-mi2	16845743	16846344	intergenic|scaffold-mi2:16845743-16846344	intergenic	13.473	crovir-transcript-953	16858852	435.211	0.733892	12808.5	0.005725	0.005725	0.001229	0.006954	0.093693	0.063185	0.733725	0.156787	NonVenom	NA
scaffold-mi2	16857352	16857720	intergenic|scaffold-mi2:16857352-16857720	intergenic	3.08976	crovir-transcript-953	16858852	435.211	0.733892	1316	0.057567	0.057567	0.001229	0.058797	0.181668	0.122514	0.381388	0.081498	NonVenom	NA
scaffold-mi2	16924244	16924803	intergenic|scaffold-mi2:16924244-16924803	intergenic	12.7055	crovir-transcript-953	16858852	435.211	0.733892	65671.5	0.006311	0.006311	0.001229	0.007541	0.095806	0.06461	0.166913	0.035667	NonVenom	NA
scaffold-mi2	16934701	16935459	intergenic|scaffold-mi2:16934701-16935459	intergenic	12.9356	crovir-transcript-950	16995438	142.095	0.904658	60358	0.014115	0.014115	0.001229	0.015344	0.198485	0.089356	0.182879	0.042439	NonVenom	NA
scaffold-mi2	17380664	17381084	genic|scaffold-mi2:17380664-17381084	genic	5.84314	crovir-transcript-966	17383454	399.656	0.657922	2580	0.12212	0.12212	0.001229	0.123349	0.720744	0.355646	0.721254	0.293268	NonVenom	NA
scaffold-mi2	17777851	17778069	intergenic|scaffold-mi2:17777851-17778069	intergenic	1.43232	crovir-transcript-973	17780788	246.056	0.663327	2828	0.062331	0.062331	0.001229	0.063561	0.091039	0.058491	0.1768	0.066976	NonVenom	NA
scaffold-mi2	17785318	17785815	genic|scaffold-mi2:17785318-17785815	genic	3.55151	crovir-transcript-973	17780788	246.056	0.663327	4778.5	0.063262	0.063262	0.001229	0.064491	0.229041	0.147154	0.438385	0.166072	NonVenom	NA
scaffold-mi2	18479867	18481196	intergenic|scaffold-mi2:18479867-18481196	intergenic	18.9322	crovir-transcript-1019	19699711	511.803	0.899921	1.21918e+06	0.002066	0.002066	0.001035	0.0031	0.058695	0.050594	0.019586	0.008302	NonVenom	NA
scaffold-mi2	19213999	19214405	intergenic|scaffold-mi2:19213999-19214405	intergenic	6.61952	crovir-transcript-1002	19221234	191.122	0.669278	7032	0.014888	0.014888	0.001229	0.016117	0.106687	0.061473	0.607345	0.134337	NonVenom	NA
scaffold-mi2	19215314	19216010	intergenic|scaffold-mi2:19215314-19216010	intergenic	7.76967	crovir-transcript-1002	19221234	191.122	0.669278	5572	0.062392	0.062392	0.001229	0.063622	0.49432	0.284829	0.872824	0.193058	NonVenom	NA
scaffold-mi2	19241563	19242030	genic|scaffold-mi2:19241563-19242030	genic	7.41386	crovir-transcript-1002	19221234	191.122	0.669278	20562.5	0.014143	0.014143	0.001229	0.015373	0.11397	0.06567	0.267468	0.05916	NonVenom	NA
scaffold-mi2	19241563	19242030	genic|scaffold-mi2:19241563-19242030	genic	7.41386	crovir-transcript-1009	19298464	397.493	0.595737	56667.5	0.016957	0.016957	0.001229	0.018186	0.134826	0.078847	0.110728	0.041822	NonVenom	NA
scaffold-mi2	19290577	19290709	intergenic|scaffold-mi2:19290577-19290709	intergenic	0.824093	crovir-transcript-1009	19298464	397.493	0.595737	7821	0.102717	0.102717	0.001229	0.103946	0.085661	0.050095	0.06893	0.026035	NonVenom	NA
scaffold-mi2	19293657	19293915	genic|scaffold-mi2:19293657-19293915	genic	1.45356	crovir-transcript-1009	19298464	397.493	0.595737	4678	0.102717	0.102717	0.001229	0.103946	0.151093	0.08836	0.179422	0.067768	NonVenom	NA
scaffold-mi2	19296702	19296861	genic|scaffold-mi2:19296702-19296861	genic	0.994823	crovir-transcript-1009	19298464	397.493	0.595737	1682.5	0.102717	0.102717	0.001229	0.103946	0.103408	0.060474	0.122797	0.04638	NonVenom	NA
scaffold-mi2	19300474	19300739	intergenic|scaffold-mi2:19300474-19300739	intergenic	3.52856	crovir-transcript-1009	19298464	397.493	0.595737	2142.5	0.034991	0.034991	0.001229	0.03622	0.127803	0.07474	0.435551	0.164507	NonVenom	NA
scaffold-mi2	19359540	19359996	genic|scaffold-mi2:19359540-19359996	genic	5.77177	crovir-transcript-1013	19362511	1264.41	0.62938	2743	0.057866	0.057866	0.001229	0.059095	0.341081	0.222695	0.712444	0.261039	NonVenom	NA
scaffold-mi2	19369697	19370119	intergenic|scaffold-mi2:19369697-19370119	intergenic	3.28507	crovir-transcript-1013	19362511	1264.41	0.62938	7397	0.022849	0.022849	0.001229	0.024078	0.079097	0.051643	0.288428	0.10568	NonVenom	NA
scaffold-mi2	19388771	19389153	intergenic|scaffold-mi2:19388771-19389153	intergenic	3.13441	crovir-transcript-1008	19382652	266.026	0.672679	6310	0.013395	0.013395	0.001229	0.014625	0.045839	0.057468	0.316004	0.124293	NonVenom	NA
scaffold-mi2	19398519	19399126	intergenic|scaffold-mi2:19398519-19399126	intergenic	9.08877	crovir-transcript-1013	19362511	1264.41	0.62938	36311.5	0.011922	0.011922	0.001229	0.013151	0.119524	0.078038	0.19993	0.073254	NonVenom	NA
scaffold-mi2	19398519	19399126	intergenic|scaffold-mi2:19398519-19399126	intergenic	9.08877	crovir-transcript-1008	19382652	266.026	0.672679	16170.5	0.003876	0.003876	0.001229	0.005105	0.0464	0.058171	0.404123	0.158953	NonVenom	NA
scaffold-mi2	19663269	19663741	intergenic|scaffold-mi2:19663269-19663741	intergenic	6.02363	crovir-transcript-1019	19699711	511.803	0.899921	36206	0.009016	0.009016	0.001229	0.010246	0.061715	0.053198	0.13284	0.056307	NonVenom	NA
scaffold-mi9	526650	527250	intergenic|scaffold-mi9:526650-527250	intergenic	4.56628	crovir-transcript-4110	528434	273.355	0.659258	1484	0.115222	0.115222	0.001229	0.116451	0.531747	0.654409	0.563644	0.588648	NonVenom	NA
scaffold-mi9	1010642	1011397	intergenic|scaffold-mi9:1010642-1011397	intergenic	11.2161	crovir-transcript-4117	1028591	173.138	0.985304	17571.5	0.02278	0.02278	0.001229	0.024009	0.269288	0.128472	0.463936	0.099287	NonVenom	NA
scaffold-mi9	1034503	1035138	genic|scaffold-mi9:1034503-1035138	genic	13.1168	crovir-transcript-4117	1028591	173.138	0.985304	6229.5	0.044203	0.044203	0.001229	0.045432	0.595925	0.284303	1.33725	0.286187	NonVenom	NA
scaffold-mi9	1137076	1137850	intergenic|scaffold-mi9:1137076-1137850	intergenic	5.39568	crovir-transcript-4115	1129467	118.948	0.533552	7996	0.022724	0.022724	0.001229	0.023953	0.129241	0.177781	0.442712	0.24059	NonVenom	NA
scaffold-mi9	1143864	1144473	genic|scaffold-mi9:1143864-1144473	genic	7.02873	crovir-transcript-4115	1129467	118.948	0.533552	14701.5	0.008665	0.008665	0.001229	0.009894	0.069543	0.095662	0.339522	0.184512	NonVenom	NA
scaffold-mi9	2355189	2355782	intergenic|scaffold-mi9:2355189-2355782	intergenic	1.3044	crovir-transcript-4136	2356660	208.015	0.712941	1174.5	0.065133	0.065133	0.001229	0.066362	0.086562	0.123264	0.16101	0.224485	NonVenom	NA
scaffold-mi9	2363311	2363662	intergenic|scaffold-mi9:2363311-2363662	intergenic	0.736205	crovir-transcript-4136	2356660	208.015	0.712941	6826.5	0.065133	0.065133	0.001229	0.066362	0.048856	0.06957	0.069313	0.096638	NonVenom	NA
scaffold-mi9	3872211	3872720	intergenic|scaffold-mi9:3872211-3872720	intergenic	10.3938	crovir-transcript-4169	3907571	129.579	0.496933	35105.5	0.004156	0.004156	0.001229	0.005386	0.055978	0.061195	0.235455	0.14013	NonVenom	NA
scaffold-mi9	3872211	3872720	intergenic|scaffold-mi9:3872211-3872720	intergenic	10.3938	crovir-transcript-4182	4453463	205.992	0.70371	580998	0.003175	0.003175	0.001229	0.004404	0.045778	0.051118	0.020491	0.016724	NonVenom	NA
scaffold-mi9	3904927	3905336	intergenic|scaffold-mi9:3904927-3905336	intergenic	2.88483	crovir-transcript-4169	3907571	129.579	0.496933	2439.5	0.06818	0.06818	0.001229	0.069409	0.200234	0.218898	0.356092	0.211927	NonVenom	NA
scaffold-mi9	4180856	4181497	intergenic|scaffold-mi9:4180856-4181497	intergenic	3.82458	crovir-transcript-4176	4184918	346.066	0.477592	3741.5	0.095491	0.095491	0.001229	0.09672	0.369915	0.234281	0.472091	0.198533	NonVenom	NA
scaffold-mi9	4182568	4182820	intergenic|scaffold-mi9:4182568-4182820	intergenic	1.47253	crovir-transcript-4176	4184918	346.066	0.477592	2224	0.095491	0.095491	0.001229	0.09672	0.142424	0.090203	0.181764	0.076439	NonVenom	NA
scaffold-mi9	4197244	4197737	genic|scaffold-mi9:4197244-4197737	genic	3.7137	crovir-transcript-4176	4184918	346.066	0.477592	12572.5	0.040558	0.040558	0.001229	0.041788	0.155187	0.098286	0.205542	0.086439	NonVenom	NA
scaffold-mi9	4397403	4398179	intergenic|scaffold-mi9:4397403-4398179	intergenic	9.7633	crovir-transcript-4174	4436661	120.288	0.545697	38870	0.002757	0.002757	0.001229	0.003986	0.038919	0.054993	0.202415	0.179224	NonVenom	NA
scaffold-mi9	4397403	4398179	intergenic|scaffold-mi9:4397403-4398179	intergenic	9.7633	crovir-transcript-4182	4453463	205.992	0.70371	55672	0.005874	0.005874	0.001229	0.007103	0.069347	0.077437	0.148084	0.120859	NonVenom	NA
scaffold-mi9	5026639	5027288	intergenic|scaffold-mi9:5026639-5027288	intergenic	11.8755	crovir-transcript-4198	5195991	174.263	0.525323	169028	0.005321	0.005321	0.001229	0.00655	0.07779	0.101168	0.068541	0.042407	NonVenom	NA
scaffold-mi9	5026639	5027288	intergenic|scaffold-mi9:5026639-5027288	intergenic	11.8755	crovir-transcript-4201	5202858	183.93	0.466964	175894	0.021142	0.021142	0.001229	0.022372	0.265674	0.174871	0.066207	0.040652	NonVenom	NA
scaffold-mi9	5122477	5122873	intergenic|scaffold-mi9:5122477-5122873	intergenic	5.45087	crovir-transcript-4199	5124208	194.219	0.787211	1533	0.096172	0.096172	0.001229	0.097401	0.53092	0.221251	0.672833	0.234904	NonVenom	NA
scaffold-mi9	5123191	5123554	intergenic|scaffold-mi9:5123191-5123554	intergenic	5.25835	crovir-transcript-4199	5124208	194.219	0.787211	835.5	0.096172	0.096172	0.001229	0.097401	0.512168	0.213436	0.64907	0.226608	NonVenom	NA
scaffold-mi9	5136513	5137295	genic|scaffold-mi9:5136513-5137295	genic	8.81944	crovir-transcript-4199	5124208	194.219	0.787211	12696	0.046048	0.046048	0.001229	0.047277	0.416955	0.173758	0.483997	0.168976	NonVenom	NA
scaffold-mi9	5136513	5137295	genic|scaffold-mi9:5136513-5137295	genic	8.81944	crovir-transcript-4196	5171295	307.911	0.571507	34391	0.003548	0.003548	0.001229	0.004777	0.042128	0.057644	0.203397	0.108735	NonVenom	NA
scaffold-mi9	5151512	5151737	intergenic|scaffold-mi9:5151512-5151737	intergenic	4.54833	crovir-transcript-4195	5145300	364.706	0.612133	6324.5	0.083497	0.083497	0.001229	0.084726	0.385361	0.362179	0.457637	0.183749	NonVenom	NA
scaffold-mi9	5170128	5170728	intergenic|scaffold-mi9:5170128-5170728	intergenic	2.83427	crovir-transcript-4196	5171295	307.911	0.571507	867	0.023773	0.023773	0.001229	0.025002	0.070864	0.096963	0.349851	0.187029	NonVenom	NA
scaffold-mi9	5199524	5199679	intergenic|scaffold-mi9:5199524-5199679	intergenic	0.82211	crovir-transcript-4198	5195991	174.263	0.525323	3610.5	0.089454	0.089454	0.001229	0.090683	0.074551	0.096957	0.101478	0.062785	NonVenom	NA
scaffold-mi9	5209569	5209669	genic|scaffold-mi9:5209569-5209669	genic	1.9838	crovir-transcript-4201	5202858	183.93	0.466964	6761	0.124925	0.124925	0.001229	0.126154	0.250265	0.164729	0.188345	0.115648	NonVenom	NA
scaffold-mi9	5513692	5513963	genic|scaffold-mi9:5513692-5513963	genic	3.57432	crovir-transcript-4199	5124208	194.219	0.787211	389620	0.045778	0.045778	0.001229	0.047007	0.168017	0.070018	0.009976	0.003483	NonVenom	NA
scaffold-mi9	5591509	5592050	intergenic|scaffold-mi9:5591509-5592050	intergenic	10.0192	crovir-transcript-4115	1129467	118.948	0.533552	4.46231e+06	0.003442	0.003442	0.000335	0.003777	0.037843	0.052056	0.003352	0.001822	NonVenom	NA
scaffold-mi9	6331984	6332307	intergenic|scaffold-mi9:6331984-6332307	intergenic	4.25458	crovir-transcript-4236	6333338	106.374	0.799356	1192.5	0.089348	0.089348	0.001229	0.090577	0.385368	0.298671	0.525168	0.28104	NonVenom	NA
scaffold-mi9	6467456	6467612	genic|scaffold-mi9:6467456-6467612	genic	2.45742	crovir-transcript-4249	6471997	1143.16	0.879274	4463	0.071914	0.071914	0.001229	0.073143	0.179744	0.098799	0.303334	0.105031	NonVenom	NA
scaffold-mi9	6470904	6471065	genic|scaffold-mi9:6470904-6471065	genic	3.30725	crovir-transcript-4249	6471997	1143.16	0.879274	1012.5	0.071914	0.071914	0.001229	0.073143	0.241903	0.132966	0.408234	0.141353	NonVenom	NA
scaffold-ma3	4712460	4712818	genic|scaffold-ma3:4712460-4712818	genic	3.50669	crovir-transcript-4815	4699524	188.717	0.193782	13115	0.014488	0.014488	0.001229	0.015717	0.055115	0.08924	0.187082	0.1033	NonVenom	NA
scaffold-ma3	4712460	4712818	genic|scaffold-ma3:4712460-4712818	genic	3.50669	crovir-transcript-4816	4716161	119.789	0.670432	3522	0.099166	0.099166	0.001229	0.100396	0.352057	0.103416	0.432852	0.11738	NonVenom	NA
scaffold-ma3	7820661	7821064	intergenic|scaffold-ma3:7820661-7821064	intergenic	5.97477	crovir-transcript-4849	7806915	193.828	0.694966	13947.5	0.029612	0.029612	0.001229	0.030842	0.184271	0.137553	0.302137	0.141391	NonVenom	NA
scaffold-ma3	8476878	8477114	genic|scaffold-ma3:8476878-8477114	genic	1.85509	crovir-transcript-4863	8475961	148.664	0.758608	1035	0.058736	0.058736	0.001229	0.059965	0.111241	0.087365	0.228985	0.113638	NonVenom	NA
scaffold-ma3	8480053	8480462	genic|scaffold-ma3:8480053-8480462	genic	5.00762	crovir-transcript-4863	8475961	148.664	0.758608	4296.5	0.058736	0.058736	0.001229	0.059965	0.300284	0.235834	0.618121	0.306753	NonVenom	NA
scaffold-ma3	9275196	9275598	intergenic|scaffold-ma3:9275196-9275598	intergenic	3.18897	crovir-transcript-4869	9282323	241.797	0.756968	6926	0.081462	0.081462	0.001229	0.082691	0.2637	0.17257	0.296482	0.135095	NonVenom	NA
scaffold-ma3	9280257	9280658	intergenic|scaffold-ma3:9280257-9280658	intergenic	3.91866	crovir-transcript-4869	9282323	241.797	0.756968	1865.5	0.081462	0.081462	0.001229	0.082691	0.324038	0.212056	0.483704	0.220405	NonVenom	NA
scaffold-ma3	9299838	9300311	genic|scaffold-ma3:9299838-9300311	genic	8.66002	crovir-transcript-4869	9282323	241.797	0.756968	17751.5	0.01469	0.01469	0.001229	0.015919	0.137861	0.090218	0.355046	0.161781	NonVenom	NA
scaffold-ma3	9623374	9623864	genic|scaffold-ma3:9623374-9623864	genic	3.23825	crovir-transcript-4873	9750602	2400.57	0.676626	126983	0.018684	0.018684	0.001229	0.019914	0.064485	0.064416	0.02397	0.013327	NonVenom	NA
scaffold-ma3	9752947	9753107	genic|scaffold-ma3:9752947-9753107	genic	1.2921	crovir-transcript-4873	9750602	2400.57	0.676626	2425	0.040212	0.040212	0.001229	0.041441	0.053546	0.053489	0.159492	0.088676	NonVenom	NA
scaffold-ma3	9754549	9754835	genic|scaffold-ma3:9754549-9754835	genic	1.55089	crovir-transcript-4873	9750602	2400.57	0.676626	4090	0.040212	0.040212	0.001229	0.041441	0.064271	0.064202	0.191435	0.106436	NonVenom	NA
scaffold-ma3	10846515	10847045	intergenic|scaffold-ma3:10846515-10847045	intergenic	13.7617	crovir-transcript-4886	11066786	462.057	0.398889	220006	0.00124	0.00124	0.001229	0.00247	0.033986	0.055179	0.06315	0.066541	NonVenom	NA
scaffold-ma3	14163913	14164576	intergenic|scaffold-ma3:14163913-14164576	intergenic	9.3241	crovir-transcript-4899	14204516	350.425	0.955547	40271.5	0.018197	0.018197	0.001229	0.019426	0.181129	0.110707	0.187444	0.073414	NonVenom	NA
scaffold-ma3	16737281	16737762	intergenic|scaffold-ma3:16737281-16737762	intergenic	12.1953	crovir-transcript-4923	16740572	229.57	0.596162	3050.5	0.055288	0.055288	0.001229	0.056518	0.689251	0.207277	1.50534	0.201096	NonVenom	NA
scaffold-ma3	16738903	16739674	intergenic|scaffold-ma3:16738903-16739674	intergenic	25.1472	crovir-transcript-4925	16643761	159.614	0.901379	95527.5	0.006946	0.006946	0.001229	0.008176	0.205594	0.067352	0.238449	0.060119	NonVenom	NA
scaffold-ma3	16738903	16739674	intergenic|scaffold-ma3:16738903-16739674	intergenic	25.1472	crovir-transcript-4923	16740572	229.57	0.596162	1283.5	0.055288	0.055288	0.001229	0.056518	1.42126	0.427412	3.10407	0.414666	NonVenom	NA
scaffold-ma3	16738903	16739674	intergenic|scaffold-ma3:16738903-16739674	intergenic	25.1472	crovir-transcript-4942	17692747	127.777	0.828384	953458	0.003087	0.003087	0.001229	0.004317	0.108552	0.065391	0.032219	0.014335	NonVenom	NA
scaffold-ma3	16795370	16796282	genic|scaffold-ma3:16795370-16796282	genic	26.8301	crovir-transcript-4928	16794212	741.39	0.893059	1614	0.012037	0.012037	0.001229	0.013266	0.355927	0.146885	3.3118	0.466007	NonVenom	NA
scaffold-ma3	16795370	16796282	genic|scaffold-ma3:16795370-16796282	genic	26.8301	crovir-transcript-4932	17094417	809.609	0.580616	298591	0.003827	0.003827	0.001229	0.005057	0.13567	0.098701	0.09439	0.051235	NonVenom	NA
scaffold-ma3	17070523	17070806	genic|scaffold-ma3:17070523-17070806	genic	3.05065	crovir-transcript-4932	17094417	809.609	0.580616	23752.5	0.048016	0.048016	0.001229	0.049245	0.150229	0.109293	0.09708	0.052695	NonVenom	NA
scaffold-ma3	17092177	17092409	intergenic|scaffold-ma3:17092177-17092409	intergenic	1.82144	crovir-transcript-4932	17094417	809.609	0.580616	2124	0.038368	0.038368	0.001229	0.039597	0.072125	0.052471	0.224832	0.122039	NonVenom	NA
scaffold-ma3	17689825	17690193	intergenic|scaffold-ma3:17689825-17690193	intergenic	1.71845	crovir-transcript-4942	17692747	127.777	0.828384	2738	0.057873	0.057873	0.001229	0.059102	0.101563	0.061181	0.212118	0.094376	NonVenom	NA
scaffold-ma3	20528097	20528532	intergenic|scaffold-ma3:20528097-20528532	intergenic	5.04652	crovir-transcript-4979	20572524	1449.07	0.833789	44209.5	0.023299	0.023299	0.001229	0.024528	0.123783	0.056961	0.093542	0.036468	NonVenom	NA
scaffold-ma3	20576587	20577108	genic|scaffold-ma3:20576587-20577108	genic	4.13383	crovir-transcript-4979	20572524	1449.07	0.833789	4323.5	0.097134	0.097134	0.001229	0.098363	0.406618	0.187113	0.510263	0.198933	NonVenom	NA
scaffold-ma3	22885127	22885417	intergenic|scaffold-ma3:22885127-22885417	intergenic	1.7319	crovir-transcript-5009	22893819	139.977	0.892816	8547	0.056577	0.056577	0.001229	0.057806	0.100114	0.065504	0.134098	0.051353	NonVenom	NA
scaffold-ma3	25692626	25693051	genic|scaffold-ma3:25692626-25693051	genic	5.02079	crovir-transcript-5026	25692084	117.06	0.701342	754.5	0.08143	0.08143	0.001229	0.08266	0.415016	0.272268	0.619747	0.21381	NonVenom	NA
scaffold-ma3	25706584	25707686	intergenic|scaffold-ma3:25706584-25707686	intergenic	20.7322	crovir-transcript-5026	25692084	117.06	0.701342	15051	0.007689	0.007689	0.001229	0.008918	0.184899	0.121301	0.981207	0.338512	NonVenom	NA
scaffold-ma3	25706584	25707686	intergenic|scaffold-ma3:25706584-25707686	intergenic	20.7322	crovir-transcript-5035	25892249	1771.64	0.861784	185114	0.006426	0.006426	0.001229	0.007656	0.158718	0.082843	0.110559	0.043169	NonVenom	NA
scaffold-ma3	26709129	26709648	genic|scaffold-ma3:26709129-26709648	genic	14.8125	crovir-transcript-5044	26707770	1018.6	0.994838	1618.5	0.06994	0.06994	0.001229	0.071169	1.05419	0.286258	1.8284	0.297905	NonVenom	NA
scaffold-ma3	29618164	29619272	intergenic|scaffold-ma3:29618164-29619272	intergenic	17.699	crovir-transcript-5081	29676679	118.275	0.993016	57961	0.006789	0.006789	0.001229	0.008019	0.141922	0.063962	0.2592	0.045633	NonVenom	NA
scaffold-ma3	30976303	30976511	intergenic|scaffold-ma3:30976303-30976511	intergenic	2.57774	crovir-transcript-5093	30977646	6186.95	0.458128	1239	0.073958	0.073958	0.001229	0.075187	0.193812	0.222836	0.318186	0.224861	NonVenom	NA
scaffold-ma3	39806165	39806854	intergenic|scaffold-ma3:39806165-39806854	intergenic	15.6646	crovir-transcript-5191	39814244	133.597	0.335155	7734.5	0.063211	0.063211	0.001229	0.06444	1.00943	0.479922	1.32299	0.388746	NonVenom	NA
scaffold-ma3	39823700	39824384	intergenic|scaffold-ma3:39823700-39824384	intergenic	12.1933	crovir-transcript-5191	39814244	133.597	0.335155	9798	0.021296	0.021296	0.001229	0.022525	0.274656	0.130583	0.838332	0.246335	NonVenom	NA
scaffold-ma3	41958248	41958871	intergenic|scaffold-ma3:41958248-41958871	intergenic	13.1956	crovir-transcript-5218	41954180	160.001	0.516427	4379.5	0.054146	0.054146	0.001229	0.055375	0.730711	0.257121	1.62881	0.37955	NonVenom	NA
scaffold-ma3	47528497	47528937	intergenic|scaffold-ma3:47528497-47528937	intergenic	5.40065	crovir-transcript-5254	47504295	197.368	0.855651	24422	0.013102	0.013102	0.001229	0.014332	0.0774	0.074998	0.167758	0.087812	NonVenom	NA
scaffold-ma3	47564293	47564950	intergenic|scaffold-ma3:47564293-47564950	intergenic	19.8726	crovir-transcript-5254	47504295	197.368	0.855651	60326.5	0.0094	0.0094	0.001229	0.010629	0.211235	0.20468	0.281079	0.14713	NonVenom	NA
scaffold-ma3	57533396	57533561	intergenic|scaffold-ma3:57533396-57533561	intergenic	2.791	crovir-transcript-5344	57538687	850.311	0.665877	5208.5	0.053328	0.053328	0.001229	0.054557	0.152268	0.109364	0.332482	0.10129	NonVenom	NA
scaffold-ma3	59923790	59924813	intergenic|scaffold-ma3:59923790-59924813	intergenic	22.5857	crovir-transcript-5376	60016854	644.91	0.219469	92552.5	0.004049	0.004049	0.001229	0.005279	0.11922	0.077038	0.220137	0.088919	NonVenom	NA
scaffold-ma3	59923790	59924813	intergenic|scaffold-ma3:59923790-59924813	intergenic	22.5857	crovir-transcript-5375	60180876	151.398	0.31888	256574	0.003819	0.003819	0.001229	0.005048	0.114017	0.09246	0.090665	0.050595	NonVenom	NA
scaffold-ma3	59929857	59930345	intergenic|scaffold-ma3:59929857-59930345	intergenic	9.50837	crovir-transcript-5374	60156521	139.949	0.417623	226420	0.00573	0.00573	0.001229	0.006959	0.066169	0.064575	0.042555	0.026632	NonVenom	NA
scaffold-ma3	60023477	60023763	intergenic|scaffold-ma3:60023477-60023763	intergenic	2.18964	crovir-transcript-5376	60016854	644.91	0.219469	6766	0.069662	0.069662	0.001229	0.070891	0.155226	0.100304	0.207754	0.083918	NonVenom	NA
scaffold-ma3	60024114	60024342	intergenic|scaffold-ma3:60024114-60024342	intergenic	2.05706	crovir-transcript-5376	60016854	644.91	0.219469	7374	0.069662	0.069662	0.001229	0.070891	0.145827	0.094231	0.181099	0.073151	NonVenom	NA
scaffold-ma3	60182179	60182510	intergenic|scaffold-ma3:60182179-60182510	intergenic	1.276	crovir-transcript-5375	60180876	151.398	0.31888	1468.5	0.070146	0.070146	0.001229	0.071375	0.091074	0.073855	0.157504	0.087895	NonVenom	NA
scaffold-ma3	60453030	60453688	genic|scaffold-ma3:60453030-60453688	genic	5.31281	crovir-transcript-5379	60497781	253.354	0.545515	44422	0.010166	0.010166	0.001229	0.011395	0.060539	0.064027	0.098068	0.063155	NonVenom	NA
scaffold-ma3	60499840	60499986	intergenic|scaffold-ma3:60499840-60499986	intergenic	0.51743	crovir-transcript-5379	60497781	253.354	0.545515	2132	0.108332	0.108332	0.001229	0.109561	0.05669	0.059957	0.06387	0.041132	NonVenom	NA
scaffold-ma3	61472527	61472666	intergenic|scaffold-ma3:61472527-61472666	intergenic	0.970643	crovir-transcript-5396	61506488	109.128	0.580737	33891.5	0.049694	0.049694	0.001229	0.050923	0.049428	0.061537	0.022672	0.021027	NonVenom	NA
scaffold-ma3	69771143	69771469	genic|scaffold-ma3:69771143-69771469	genic	2.16599	crovir-transcript-5420	69779215	107.598	0.362361	7909	0.071861	0.071861	0.001229	0.07309	0.158312	0.352248	0.179417	0.2016	NonVenom	NA
scaffold-ma3	70502520	70502827	genic|scaffold-ma3:70502520-70502827	genic	3.35333	crovir-transcript-5428	70520628	338.019	0.634056	17954.5	0.017162	0.017162	0.001229	0.018391	0.061672	0.050219	0.136128	0.073673	NonVenom	NA
scaffold-ma3	70507106	70507525	genic|scaffold-ma3:70507106-70507525	genic	3.13343	crovir-transcript-5428	70520628	338.019	0.634056	13312.5	0.018583	0.018583	0.001229	0.019813	0.062082	0.050552	0.165009	0.089304	NonVenom	NA
scaffold-ma3	70521214	70521462	intergenic|scaffold-ma3:70521214-70521462	intergenic	1.11225	crovir-transcript-5428	70520628	338.019	0.634056	710	0.072655	0.072655	0.001229	0.073885	0.082178	0.066916	0.137291	0.074303	NonVenom	NA
scaffold-ma3	70524434	70524789	intergenic|scaffold-ma3:70524434-70524789	intergenic	2.07497	crovir-transcript-5428	70520628	338.019	0.634056	3983.5	0.072655	0.072655	0.001229	0.073885	0.153308	0.124836	0.256126	0.138618	NonVenom	NA
scaffold-ma3	70594460	70595327	intergenic|scaffold-ma3:70594460-70595327	intergenic	11.7675	crovir-transcript-5428	70520628	338.019	0.634056	74265.5	0.012322	0.012322	0.001229	0.013551	0.159459	0.129845	0.138904	0.075176	NonVenom	NA
scaffold-ma3	70933845	70934879	intergenic|scaffold-ma3:70933845-70934879	intergenic	11.1442	crovir-transcript-5436	72487302	1060.57	0.208113	1552940	0.002154	0.002154	0.000838	0.002992	0.033344	0.059671	0.00934	0.007822	NonVenom	NA
scaffold-ma3	72480840	72481086	intergenic|scaffold-ma3:72480840-72481086	intergenic	1.01074	crovir-transcript-5436	72487302	1060.57	0.208113	6339	0.056526	0.056526	0.001229	0.057755	0.058376	0.104468	0.101495	0.084994	NonVenom	NA
scaffold-ma3	72482986	72483233	intergenic|scaffold-ma3:72482986-72483233	intergenic	0.542083	crovir-transcript-5436	72487302	1060.57	0.208113	4192.5	0.056526	0.056526	0.001229	0.057755	0.031308	0.056029	0.066913	0.056034	NonVenom	NA
scaffold-ma3	75092532	75092991	intergenic|scaffold-ma3:75092532-75092991	intergenic	7.62522	crovir-transcript-5471	75080363	466.898	0.775976	12398.5	0.061965	0.061965	0.001229	0.063195	0.481873	0.237351	0.427181	0.115138	NonVenom	NA
scaffold-ma3	75093903	75094129	intergenic|scaffold-ma3:75093903-75094129	intergenic	5.19644	crovir-transcript-5471	75080363	466.898	0.775976	13653	0.061965	0.061965	0.001229	0.063195	0.328387	0.16175	0.267702	0.072153	NonVenom	NA
scaffold-ma3	76363615	76364367	intergenic|scaffold-ma3:76363615-76364367	intergenic	52.9863	crovir-transcript-5479	76057573	194.467	0.795105	306418	0	0	0.001229	0.001229	0.065131	0.053836	0.18226	0.105352	NonVenom	NA
scaffold-ma3	76363615	76364367	intergenic|scaffold-ma3:76363615-76364367	intergenic	52.9863	crovir-transcript-5520	79804309	214.562	0.739297	3440318	0.00434	0.00434	0.00042	0.00476	0.252191	0.175742	0.02223	0.01159	NonVenom	NA
scaffold-ma3	76818028	76818401	genic|scaffold-ma3:76818028-76818401	genic	6.12969	crovir-transcript-5489	76816487	245.303	0.659744	1727.5	0.113203	0.113203	0.001229	0.114432	0.701434	0.44013	0.756625	0.423154	NonVenom	NA
scaffold-ma3	78927828	78928536	intergenic|scaffold-ma3:78927828-78928536	intergenic	12.5272	crovir-transcript-5512	78999683	137.607	0.983178	71501	0.015576	0.015576	0.001229	0.016805	0.210517	0.062941	0.152834	0.043767	NonVenom	NA
scaffold-ma3	79708267	79708955	intergenic|scaffold-ma3:79708267-79708955	intergenic	21.1101	crovir-transcript-5515	79744342	303.939	0.956458	35731	0.014143	0.014143	0.001229	0.015372	0.324506	0.088663	0.470925	0.103962	NonVenom	NA
scaffold-ma3	79708267	79708955	intergenic|scaffold-ma3:79708267-79708955	intergenic	21.1101	crovir-transcript-5520	79804309	214.562	0.739297	95698	0.002965	0.002965	0.001229	0.004194	0.088538	0.061698	0.199858	0.104194	NonVenom	NA
scaffold-ma3	79964318	79964603	intergenic|scaffold-ma3:79964318-79964603	intergenic	19.0917	crovir-transcript-5521	80356296	125.222	0.095828	391836	0.00324	0.00324	0.001229	0.004469	0.085328	0.104087	0.053023	0.042351	NonVenom	NA
scaffold-ma3	80201449	80202017	genic|scaffold-ma3:80201449-80202017	genic	11.143	crovir-transcript-5527	80274488	172.633	0.155554	72755	0.004972	0.004972	0.001229	0.006202	0.069105	0.070893	0.133905	0.092384	NonVenom	NA
scaffold-ma3	80223666	80224282	genic|scaffold-ma3:80223666-80224282	genic	6.82601	crovir-transcript-5527	80274488	172.633	0.155554	50514	0.006427	0.006427	0.001229	0.007657	0.052264	0.053617	0.112671	0.077734	NonVenom	NA
scaffold-ma3	80328905	80329395	intergenic|scaffold-ma3:80328905-80329395	intergenic	5.76072	crovir-transcript-5527	80274488	172.633	0.155554	54662	0.009852	0.009852	0.001229	0.011081	0.063836	0.065489	0.088778	0.06125	NonVenom	NA
scaffold-ma3	81080276	81080687	intergenic|scaffold-ma3:81080276-81080687	intergenic	5.04688	crovir-transcript-5542	81372806	238.706	0.991134	292324	0.044153	0.044153	0.001229	0.045383	0.229041	0.083485	0.018086	0.005215	NonVenom	NA
scaffold-ma3	81394671	81395056	genic|scaffold-ma3:81394671-81395056	genic	9.63086	crovir-transcript-5542	81372806	238.706	0.991134	22057.5	0.027048	0.027048	0.001229	0.028277	0.272334	0.099265	0.32687	0.094256	NonVenom	NA
scaffold-ma3	82473355	82473531	intergenic|scaffold-ma3:82473355-82473531	intergenic	1.32153	crovir-transcript-5553	82468960	129.914	0.8381	4483	0.053703	0.053703	0.001229	0.054932	0.072594	0.056221	0.163124	0.085641	NonVenom	NA
scaffold-ma3	82700589	82701269	intergenic|scaffold-ma3:82700589-82701269	intergenic	13.4407	crovir-transcript-5557	82699607	124.889	0.533856	1322	0.05643	0.05643	0.001229	0.057659	0.774978	0.545921	1.65906	0.682145	NonVenom	NA
scaffold-ma3	82700589	82701269	intergenic|scaffold-ma3:82700589-82701269	intergenic	13.4407	crovir-transcript-5556	82726215	168.403	0.378393	25286	0.004294	0.004294	0.001229	0.005524	0.07424	0.079559	0.405062	0.268081	NonVenom	NA
scaffold-ma3	82724671	82724946	intergenic|scaffold-ma3:82724671-82724946	intergenic	3.52922	crovir-transcript-5556	82726215	168.403	0.378393	1406.5	0.089421	0.089421	0.001229	0.09065	0.319926	0.342847	0.435634	0.288314	NonVenom	NA
scaffold-ma3	83248816	83249575	genic|scaffold-ma3:83248816-83249575	genic	3.51831	crovir-transcript-5566	83250509	132.011	0.893302	1313.5	0.065518	0.065518	0.001229	0.066747	0.234837	0.161435	0.434287	0.196933	NonVenom	NA
scaffold-ma3	86581897	86582230	intergenic|scaffold-ma3:86581897-86582230	intergenic	1.9717	crovir-transcript-5596	86555328	585.048	0.865063	26735.5	0.061462	0.061462	0.001229	0.062691	0.123608	0.094105	0.056608	0.030272	NonVenom	NA
scaffold-ma3	87367918	87368667	intergenic|scaffold-ma3:87367918-87368667	intergenic	16.2006	crovir-transcript-5610	87475482	201.746	0.212243	107190	0.004403	0.004403	0.001229	0.005632	0.091237	0.083288	0.138968	0.032083	NonVenom	NA
scaffold-ma3	87498951	87499387	intergenic|scaffold-ma3:87498951-87499387	intergenic	28.8403	crovir-transcript-5610	87475482	201.746	0.212243	23687	0.013102	0.013102	0.001229	0.014331	0.413319	0.377307	0.919988	0.212393	NonVenom	NA
scaffold-ma3	87502948	87504048	intergenic|scaffold-ma3:87502948-87504048	intergenic	46.6645	crovir-transcript-5610	87475482	201.746	0.212243	28016	0	0	0.001229	0.001229	0.05736	0.052362	1.28632	0.296968	NonVenom	NA
scaffold-ma3	89732729	89733189	intergenic|scaffold-ma3:89732729-89733189	intergenic	3.13088	crovir-transcript-5635	89747196	167.605	0.991012	14237	0.03953	0.03953	0.001229	0.04076	0.127613	0.064833	0.15552	0.043099	NonVenom	NA
scaffold-ma3	90560847	90561488	intergenic|scaffold-ma3:90560847-90561488	intergenic	15.8464	crovir-transcript-5663	90817034	102.676	0.784903	255866	0.003861	0.003861	0.001229	0.00509	0.080663	0.07771	0.063764	0.031054	NonVenom	NA
scaffold-ma3	90801743	90802709	intergenic|scaffold-ma3:90801743-90802709	intergenic	15.7142	crovir-transcript-5660	90803511	175.494	0.556325	1285	0.119655	0.119655	0.001229	0.120884	1.89959	0.715496	1.9397	0.65374	NonVenom	NA
scaffold-ma3	90801743	90802709	intergenic|scaffold-ma3:90801743-90802709	intergenic	15.7142	crovir-transcript-5663	90817034	102.676	0.784903	14808	0.005462	0.005462	0.001229	0.006692	0.105154	0.101305	0.754322	0.367365	NonVenom	NA
scaffold-ma3	96251089	96251956	intergenic|scaffold-ma3:96251089-96251956	intergenic	8.45644	crovir-transcript-5692	96289176	374.829	0.872594	37653.5	0.019107	0.019107	0.001229	0.020336	0.17197	0.075887	0.180239	0.058201	NonVenom	NA
scaffold-ma3	96285725	96286040	intergenic|scaffold-ma3:96285725-96286040	intergenic	4.02047	crovir-transcript-5692	96289176	374.829	0.872594	3293.5	0.092021	0.092021	0.001229	0.09325	0.374908	0.165439	0.496271	0.160252	NonVenom	NA
scaffold-ma3	96286281	96286723	intergenic|scaffold-ma3:96286281-96286723	intergenic	4.64931	crovir-transcript-5692	96289176	374.829	0.872594	2674	0.092021	0.092021	0.001229	0.09325	0.433547	0.191315	0.573892	0.185317	NonVenom	NA
scaffold-ma3	99274079	99274624	intergenic|scaffold-ma3:99274079-99274624	intergenic	4.0594	crovir-transcript-5721	99262226	799.375	0.873444	12125.5	0.048749	0.048749	0.001229	0.049978	0.202881	0.202929	0.231864	0.118132	NonVenom	NA
scaffold-ma3	104142862	104143335	genic|scaffold-ma3:104142862-104143335	genic	11.1557	crovir-transcript-5752	104144017	157.459	0.994777	918.5	0.036148	0.036148	0.001229	0.037377	0.416966	0.190212	1.37701	0.245671	NonVenom	NA
scaffold-ma3	104144882	104145342	intergenic|scaffold-ma3:104144882-104145342	intergenic	9.37073	crovir-transcript-5752	104144017	157.459	0.994777	1095	0.036148	0.036148	0.001229	0.037377	0.35025	0.159778	1.15669	0.206363	NonVenom	NA
scaffold-ma3	105999946	106000210	intergenic|scaffold-ma3:105999946-106000210	intergenic	5.13757	crovir-transcript-5786	105968685	1561.33	0.37147	31393	0.011636	0.011636	0.001229	0.012865	0.066095	0.051113	0.128269	0.065153	NonVenom	NA
scaffold-ma3	106002673	106003491	intergenic|scaffold-ma3:106002673-106003491	intergenic	24.8515	crovir-transcript-5786	105968685	1561.33	0.37147	34397	0.011636	0.011636	0.001229	0.012865	0.319713	0.247242	0.573047	0.291075	NonVenom	NA
scaffold-ma3	106035808	106036687	intergenic|scaffold-ma3:106035808-106036687	intergenic	19.6182	crovir-transcript-5786	105968685	1561.33	0.37147	67562.5	0.005774	0.005774	0.001229	0.007003	0.137391	0.106248	0.251439	0.127716	NonVenom	NA
scaffold-ma3	106052102	106052532	genic|scaffold-ma3:106052102-106052532	genic	5.57091	crovir-transcript-5786	105968685	1561.33	0.37147	83632	0.010443	0.010443	0.001229	0.011672	0.065024	0.050284	0.059303	0.030123	NonVenom	NA
scaffold-ma3	112635932	112636307	genic|scaffold-ma3:112635932-112636307	genic	1.25969	crovir-transcript-5846	112633053	575.356	0.571446	3066.5	0.081717	0.081717	0.001229	0.082946	0.104487	0.150832	0.155491	0.159615	NonVenom	NA
scaffold-ma3	121741152	121741691	genic|scaffold-ma3:121741152-121741691	genic	8.25321	crovir-transcript-5923	121740482	322.642	0.588085	939.5	0.104341	0.104341	0.001229	0.10557	0.871291	0.370035	1.01874	0.345681	NonVenom	NA
scaffold-ma3	121742320	121742683	genic|scaffold-ma3:121742320-121742683	genic	5.6059	crovir-transcript-5923	121740482	322.642	0.588085	2019.5	0.104341	0.104341	0.001229	0.10557	0.591815	0.251342	0.69197	0.2348	NonVenom	NA
scaffold-ma3	122752001	122752238	genic|scaffold-ma3:122752001-122752238	genic	1.95961	crovir-transcript-5945	122755803	105.918	0.554898	3683.5	0.03662	0.03662	0.001229	0.037849	0.07417	0.053379	0.241886	0.087692	NonVenom	NA
scaffold-ma3	122752874	122753581	genic|scaffold-ma3:122752874-122753581	genic	6.0807	crovir-transcript-5945	122755803	105.918	0.554898	2575.5	0.03662	0.03662	0.001229	0.037849	0.23015	0.165636	0.750577	0.27211	NonVenom	NA
scaffold-ma3	122763022	122763317	genic|scaffold-ma3:122763022-122763317	genic	2.13342	crovir-transcript-5945	122755803	105.918	0.554898	7366.5	0.064893	0.064893	0.001229	0.066122	0.141065	0.101523	0.187988	0.068152	NonVenom	NA
scaffold-ma3	125223056	125223958	intergenic|scaffold-ma3:125223056-125223958	intergenic	24.7228	crovir-transcript-6011	128305227	102.938	0.378545	3081720	0.002771	0.002771	0.000462	0.003233	0.07992	0.065467	0.011415	0.004691	NonVenom	NA
scaffold-ma3	127726561	127727158	intergenic|scaffold-ma3:127726561-127727158	intergenic	10.8166	crovir-transcript-5996	127663440	192.63	0.751382	63419.5	0.01645	0.01645	0.001229	0.017679	0.191229	0.132132	0.146479	0.059722	NonVenom	NA
scaffold-ma3	128301773	128302373	intergenic|scaffold-ma3:128301773-128302373	intergenic	2.91062	crovir-transcript-6011	128305227	102.938	0.378545	3154	0.039589	0.039589	0.001229	0.040818	0.118805	0.097321	0.359275	0.147651	NonVenom	NA
scaffold-ma3	132189399	132189967	genic|scaffold-ma3:132189399-132189967	genic	6.65006	crovir-transcript-6070	132194854	172.724	0.937876	5171	0.024402	0.024402	0.001229	0.025631	0.170449	0.111044	0.797194	0.286502	NonVenom	NA
scaffold-ma3	133851488	133851932	intergenic|scaffold-ma3:133851488-133851932	intergenic	7.56331	crovir-transcript-6103	133850129	121.894	0.484575	1581	0.156101	0.156101	0.001229	0.15733	1.18994	0.523992	0.933585	0.314886	NonVenom	NA
scaffold-ma3	133851488	133851932	intergenic|scaffold-ma3:133851488-133851932	intergenic	7.56331	crovir-transcript-6097	133856017	135.37	0.836825	4307	0.052586	0.052586	0.001229	0.053815	0.407021	0.262971	0.933585	0.30066	NonVenom	NA
scaffold-ma3	133857166	133857400	genic|scaffold-ma3:133857166-133857400	genic	1.71422	crovir-transcript-6097	133856017	135.37	0.836825	1266	0.052586	0.052586	0.001229	0.053815	0.092251	0.059602	0.211596	0.068144	NonVenom	NA
scaffold-ma3	137118952	137119549	intergenic|scaffold-ma3:137118952-137119549	intergenic	11.3031	crovir-transcript-6153	137070384	271.865	0.803182	48866.5	0.007177	0.007177	0.001229	0.008406	0.095012	0.069743	0.192031	0.085003	NonVenom	NA
scaffold-ma3	137425112	137425352	intergenic|scaffold-ma3:137425112-137425352	intergenic	2.5016	crovir-transcript-6165	137423944	233.764	0.456064	1288	0.072289	0.072289	0.001229	0.073518	0.183914	0.115607	0.308788	0.110491	NonVenom	NA
scaffold-ma3	137469860	137470062	genic|scaffold-ma3:137469860-137470062	genic	4.46014	crovir-transcript-6162	137469235	129.945	0.998117	726	0.115133	0.115133	0.001229	0.116363	0.518993	0.113775	0.550542	0.112973	NonVenom	NA
scaffold-ma3	137868437	137869156	intergenic|scaffold-ma3:137868437-137869156	intergenic	10.4523	crovir-transcript-6170	137836032	100.171	0.510718	32764.5	0.008972	0.008972	0.001229	0.010201	0.106626	0.064754	0.251432	0.090264	NonVenom	NA
scaffold-ma3	137874955	137875564	intergenic|scaffold-ma3:137874955-137875564	intergenic	8.62583	crovir-transcript-6170	137836032	100.171	0.510718	39227.5	0.009908	0.009908	0.001229	0.011138	0.096071	0.058344	0.177414	0.063692	NonVenom	NA
scaffold-ma3	142476645	142477572	intergenic|scaffold-ma3:142476645-142477572	intergenic	11.8896	crovir-transcript-6247	142335119	110.101	0.464808	141990	0.004754	0.004754	0.001229	0.005983	0.07114	0.064262	0.079859	0.029143	NonVenom	NA
scaffold-ma3	146546108	146546404	intergenic|scaffold-ma3:146546108-146546404	intergenic	2.39264	crovir-transcript-6315	146541162	122.401	0.60849	5094	0.11512	0.11512	0.001229	0.116349	0.278381	0.189986	0.290592	0.114007	NonVenom	NA
scaffold-ma3	146549484	146549641	intergenic|scaffold-ma3:146549484-146549641	intergenic	2.58041	crovir-transcript-6315	146541162	122.401	0.60849	8400.5	0.11512	0.11512	0.001229	0.116349	0.300228	0.204896	0.202824	0.079573	NonVenom	NA
scaffold-ma3	146552842	146553224	intergenic|scaffold-ma3:146552842-146553224	intergenic	6.25144	crovir-transcript-6315	146541162	122.401	0.60849	11871	0.041858	0.041858	0.001229	0.043087	0.269358	0.183829	0.363719	0.142696	NonVenom	NA
scaffold-ma3	148519866	148520387	intergenic|scaffold-ma3:148519866-148520387	intergenic	10.5716	crovir-transcript-6332	148659454	136.095	0.895245	139328	0.007215	0.007215	0.001229	0.008444	0.089269	0.051508	0.072185	0.028307	NonVenom	NA
scaffold-ma3	151809185	151809749	genic|scaffold-ma3:151809185-151809749	genic	10.6117	crovir-transcript-6372	151795382	260.968	0.96575	14085	0.024824	0.024824	0.001229	0.026054	0.276473	0.118988	0.53206	0.11757	NonVenom	NA
scaffold-ma3	154152484	154153035	intergenic|scaffold-ma3:154152484-154153035	intergenic	7.3131	crovir-transcript-6404	154164506	215.014	0.932228	11746.5	0.019036	0.019036	0.001229	0.020265	0.148201	0.062631	0.429409	0.103281	NonVenom	NA
scaffold-ma3	154167700	154168003	genic|scaffold-ma3:154167700-154168003	genic	2.75489	crovir-transcript-6404	154164506	215.014	0.932228	3345.5	0.050575	0.050575	0.001229	0.051805	0.142716	0.060313	0.340053	0.081789	NonVenom	NA
scaffold-ma3	154188828	154189366	intergenic|scaffold-ma3:154188828-154189366	intergenic	8.03227	crovir-transcript-6404	154164506	215.014	0.932228	24591	0.019482	0.019482	0.001229	0.020711	0.166355	0.070303	0.24801	0.059651	NonVenom	NA
scaffold-ma3	154440493	154441010	intergenic|scaffold-ma3:154440493-154441010	intergenic	7.42803	crovir-transcript-6421	154450882	124.738	0.70948	10130.5	0.012325	0.012325	0.001229	0.013554	0.100682	0.069101	0.496089	0.163038	NonVenom	NA
scaffold-ma3	157980032	157980960	intergenic|scaffold-ma3:157980032-157980960	intergenic	22.6078	crovir-transcript-6467	157391563	343.977	0.96994	588933	0.002515	0.002515	0.001229	0.003744	0.084643	0.056155	0.044048	0.015568	NonVenom	NA
scaffold-ma3	157980032	157980960	intergenic|scaffold-ma3:157980032-157980960	intergenic	22.6078	crovir-transcript-6487	158713660	148.312	0.990041	733164	0.002186	0.002186	0.001229	0.003415	0.077212	0.05061	0.036404	0.01501	NonVenom	NA
scaffold-ma3	162796709	162797369	intergenic|scaffold-ma3:162796709-162797369	intergenic	23.6637	crovir-transcript-6506	162613087	369.86	0.915103	183952	0.004606	0.004606	0.001229	0.005835	0.138081	0.103031	0.126884	0.056147	NonVenom	NA
scaffold-ma3	165630216	165630480	intergenic|scaffold-ma3:165630216-165630480	intergenic	4.38479	crovir-transcript-6558	165631417	271.314	0.981964	1069	0.093852	0.093852	0.001229	0.095081	0.41691	0.14367	0.541242	0.14063	NonVenom	NA
scaffold-ma3	172757508	172758018	intergenic|scaffold-ma3:172757508-172758018	intergenic	7.03229	crovir-transcript-6626	172827715	223.057	0.767657	69952	0.007395	0.007395	0.001229	0.008624	0.060644	0.071099	0.087445	0.053407	NonVenom	NA
scaffold-ma3	177898640	177899216	genic|scaffold-ma3:177898640-177899216	genic	4.59657	crovir-transcript-6657	177905725	1339.8	0.882796	6797	0.017421	0.017421	0.001229	0.01865	0.085727	0.054228	0.434394	0.173685	NonVenom	NA
scaffold-ma3	177902632	177903084	genic|scaffold-ma3:177902632-177903084	genic	4.68448	crovir-transcript-6657	177905725	1339.8	0.882796	2867	0.087544	0.087544	0.001229	0.088774	0.415858	0.263057	0.578234	0.231197	NonVenom	NA
scaffold-ma2	1477886	1478850	intergenic|scaffold-ma2:1477886-1478850	intergenic	17.6416	crovir-transcript-13128	1401479	218.742	0.668185	76889	0.001549	0.001549	0.001229	0.002778	0.049017	0.06265	0.202048	0.139214	NonVenom	NA
scaffold-ma2	2810059	2810321	genic|scaffold-ma2:2810059-2810321	genic	2.02936	crovir-transcript-13165	2819004	172.132	0.522439	8814	0.062789	0.062789	0.001229	0.064019	0.129917	0.119938	0.152981	0.09943	NonVenom	NA
scaffold-ma2	2905484	2905671	genic|scaffold-ma2:2905484-2905671	genic	2.18898	crovir-transcript-13168	2909876	458.585	0.43235	4298.5	0.060709	0.060709	0.001229	0.061939	0.135583	0.092567	0.270199	0.103485	NonVenom	NA
scaffold-ma2	2906016	2906707	genic|scaffold-ma2:2906016-2906707	genic	5.93529	crovir-transcript-13168	2909876	458.585	0.43235	3514.5	0.060709	0.060709	0.001229	0.061939	0.367624	0.250989	0.732629	0.280593	NonVenom	NA
scaffold-ma2	3467372	3468550	intergenic|scaffold-ma2:3467372-3468550	intergenic	44.0847	crovir-transcript-13165	2819004	172.132	0.522439	648957	0	0	0.001229	0.001229	0.054189	0.050027	0.078937	0.051305	NonVenom	NA
scaffold-ma2	3467372	3468550	intergenic|scaffold-ma2:3467372-3468550	intergenic	44.0847	crovir-transcript-13211	3714086	192.948	0.367401	246125	0	0	0.001229	0.001229	0.054189	0.050766	0.183486	0.096475	NonVenom	NA
scaffold-ma2	4292002	4292894	intergenic|scaffold-ma2:4292002-4292894	intergenic	25.1798	crovir-transcript-13209	3719542	159.662	0.133935	572906	0.001875	0.001875	0.001229	0.003104	0.078168	0.071433	0.050251	0.02554	NonVenom	PER5_cvt13215-Vespryn
scaffold-ma2	4292002	4292894	intergenic|scaffold-ma2:4292002-4292894	intergenic	25.1798	crovir-transcript-13215	4377779	5076.26	0.86725	85331	0.006649	0.006649	0.001229	0.007879	0.198383	0.061435	0.263395	0.052488	Venom	PER5_cvt13215-Vespryn
scaffold-ma2	4292002	4292894	intergenic|scaffold-ma2:4292002-4292894	intergenic	25.1798	crovir-transcript-13216	4399620	1951.75	0.879092	107172	0.004033	0.004033	0.001229	0.005262	0.13249	0.055691	0.216023	0.053037	NonVenom	PER5_cvt13215-Vespryn
scaffold-ma2	4375904	4376257	intergenic|scaffold-ma2:4375904-4376257	intergenic	3.87144	crovir-transcript-13215	4377779	5076.26	0.86725	1698.5	0.084392	0.084392	0.001229	0.085622	0.331479	0.102652	0.477875	0.095229	Venom	PER6_cvt13215-Vespryn
scaffold-ma2	4381626	4382035	genic|scaffold-ma2:4381626-4382035	genic	3.81774	crovir-transcript-13215	4377779	5076.26	0.86725	4051.5	0.084392	0.084392	0.001229	0.085622	0.326881	0.101228	0.471247	0.093908	Venom	PER7_cvt13215-Vespryn
scaffold-ma2	4963628	4964109	intergenic|scaffold-ma2:4963628-4964109	intergenic	9.63544	crovir-transcript-13228	5025236	109.78	0.5985	61367.5	0.006885	0.006885	0.001229	0.008114	0.078184	0.055099	0.13427	0.056656	NonVenom	NA
scaffold-ma2	4995453	4996178	intergenic|scaffold-ma2:4995453-4996178	intergenic	12.2343	crovir-transcript-13228	5025236	109.78	0.5985	29420.5	0.010409	0.010409	0.001229	0.011638	0.142384	0.100344	0.323192	0.136372	NonVenom	NA
scaffold-ma2	5487355	5487765	intergenic|scaffold-ma2:5487355-5487765	intergenic	2.25928	crovir-transcript-13243	5494048	734.199	0.830935	6488	0.110999	0.110999	0.001229	0.112228	0.253555	0.113439	0.22233	0.084931	NonVenom	NA
scaffold-ma2	7281077	7281527	intergenic|scaffold-ma2:7281077-7281527	intergenic	7.59922	crovir-transcript-13286	7313534	229.514	0.946681	32232	0.017954	0.017954	0.001229	0.019183	0.145778	0.05233	0.185425	0.046444	NonVenom	NA
scaffold-ma2	17648791	17649434	intergenic|scaffold-ma2:17648791-17649434	intergenic	68.0858	crovir-transcript-13355	17059772	143.616	0.398737	589340	0	0	0.001229	0.001229	0.083691	0.181807	0.132574	0.134425	NonVenom	NA
scaffold-ma2	19267545	19268826	intergenic|scaffold-ma2:19267545-19268826	intergenic	129.066	crovir-transcript-13355	17059772	143.616	0.398737	2.20841e+06	0	0	0.000617	0.000617	0.079631	0.172989	0.079631	0.080743	NonVenom	NA
scaffold-ma2	26878437	26878758	genic|scaffold-ma2:26878437-26878758	genic	1.34897	crovir-transcript-13412	26876876	196.261	0.856744	1721.5	0.055577	0.055577	0.001229	0.056806	0.07663	0.052557	0.166512	0.06645	NonVenom	NA
scaffold-ma2	32605588	32605973	genic|scaffold-ma2:32605588-32605973	genic	7.56743	crovir-transcript-13451	32606890	639.772	0.997692	1109.5	0.044519	0.044519	0.001229	0.045748	0.346197	0.126812	0.934094	0.146593	NonVenom	NA
scaffold-ma2	32618518	32619459	intergenic|scaffold-ma2:32618518-32619459	intergenic	15.8	crovir-transcript-13451	32606890	639.772	0.997692	12098.5	0.023922	0.023922	0.001229	0.025151	0.397382	0.145561	0.904214	0.141904	NonVenom	NA
scaffold-ma2	32618518	32619459	intergenic|scaffold-ma2:32618518-32619459	intergenic	15.8	crovir-transcript-13450	32640752	187.042	0.111344	21763.5	0.00573	0.00573	0.001229	0.006959	0.109956	0.109721	0.542547	0.211315	NonVenom	NA
scaffold-ma2	32662412	32662828	intergenic|scaffold-ma2:32662412-32662828	intergenic	3.73435	crovir-transcript-13450	32640752	187.042	0.111344	21868	0.012332	0.012332	0.001229	0.013562	0.050644	0.050535	0.127698	0.049737	NonVenom	NA
scaffold-ma2	32664773	32665177	intergenic|scaffold-ma2:32664773-32665177	intergenic	4.17296	crovir-transcript-13450	32640752	187.042	0.111344	24223	0.012332	0.012332	0.001229	0.013562	0.056592	0.056471	0.130548	0.050847	NonVenom	NA
scaffold-ma2	36203966	36204141	genic|scaffold-ma2:36203966-36204141	genic	1.5118	crovir-transcript-13497	36200510	852.446	0.217739	3543.5	0.108366	0.108366	0.001229	0.109595	0.165686	0.24818	0.18661	0.157257	NonVenom	NA
scaffold-ma2	38988579	38989167	genic|scaffold-ma2:38988579-38989167	genic	10.8774	crovir-transcript-13541	38985352	267.265	0.262586	3521	0.071595	0.071595	0.001229	0.072824	0.792138	0.513846	1.34266	0.545474	NonVenom	NA
scaffold-ma2	41901095	41901822	intergenic|scaffold-ma2:41901095-41901822	intergenic	33.2226	crovir-transcript-13572	41898142	751.138	0.605575	3316.5	0.07934	0.07934	0.001229	0.080569	2.67671	0.690059	4.10087	0.671957	NonVenom	NA
scaffold-ma2	45321255	45321383	intergenic|scaffold-ma2:45321255-45321383	intergenic	0.936982	crovir-transcript-13604	45320644	3036.92	0.628044	675	0.061788	0.061788	0.001229	0.063017	0.059046	0.052848	0.115657	0.080138	NonVenom	NA
scaffold-ma2	46047308	46047810	intergenic|scaffold-ma2:46047308-46047810	intergenic	5.00661	crovir-transcript-13629	46040819	248.414	0.861238	6740	0.054877	0.054877	0.001229	0.056106	0.280902	0.197588	0.476623	0.194318	NonVenom	NA
scaffold-ma2	49209599	49210225	intergenic|scaffold-ma2:49209599-49210225	intergenic	22.633	crovir-transcript-13676	49203176	153.859	0.329082	6736	0.054764	0.054764	0.001229	0.055994	1.26731	0.594384	2.15575	0.592401	NonVenom	NA
scaffold-ma2	50859053	50859411	intergenic|scaffold-ma2:50859053-50859411	intergenic	5.90238	crovir-transcript-13688	50860928	164.681	0.542965	1696	0.023074	0.023074	0.001229	0.024303	0.143447	0.101086	0.728566	0.30531	NonVenom	NA
scaffold-ma2	51472940	51473951	intergenic|scaffold-ma2:51472940-51473951	intergenic	42.0541	crovir-transcript-13707	51158092	148.35	0.712091	315354	0.004797	0.004797	0.001229	0.006027	0.253445	0.148043	0.141083	0.046811	NonVenom	NA
scaffold-ma2	52531142	52531333	genic|scaffold-ma2:52531142-52531333	genic	3.15696	crovir-transcript-13742	52532146	248.649	0.971822	908.5	0.122337	0.122337	0.001229	0.123566	0.390092	0.100275	0.389682	0.083134	NonVenom	NA
scaffold-ma2	60552758	60553278	genic|scaffold-ma2:60552758-60553278	genic	4.5946	crovir-transcript-13852	60531691	119.225	0.473705	21327	0.0173	0.0173	0.001229	0.018529	0.085136	0.078122	0.160577	0.065809	NonVenom	NA
scaffold-ma2	60697824	60698388	intergenic|scaffold-ma2:60697824-60698388	intergenic	13.5918	crovir-transcript-13858	60677066	537.372	0.919354	21040	0.022176	0.022176	0.001229	0.023405	0.318111	0.103688	0.480651	0.080425	NonVenom	NA
scaffold-ma2	60697824	60698388	intergenic|scaffold-ma2:60697824-60698388	intergenic	13.5918	crovir-transcript-13853	60707992	297.8	0.886136	9886	0.026578	0.026578	0.001229	0.027807	0.377952	0.098543	0.927239	0.178802	NonVenom	NA
scaffold-ma2	60706779	60707154	intergenic|scaffold-ma2:60706779-60707154	intergenic	3.73998	crovir-transcript-13853	60707992	297.8	0.886136	1025.5	0.145349	0.145349	0.001229	0.146578	0.5482	0.142932	0.461649	0.089021	NonVenom	NA
scaffold-ma2	62347710	62348632	intergenic|scaffold-ma2:62347710-62348632	intergenic	33.8456	crovir-transcript-13896	64853633	111.422	0.507135	2505462	0.002267	0.002267	0.000553	0.00282	0.095447	0.100048	0.018711	0.011441	NonVenom	NA
scaffold-ma2	62848733	62849525	genic|scaffold-ma2:62848733-62849525	genic	14.8441	crovir-transcript-13874	62964094	750.154	0.949718	114965	0.011135	0.011135	0.001229	0.012364	0.183538	0.078763	0.119806	0.039475	NonVenom	NA
scaffold-ma2	64878433	64879103	intergenic|scaffold-ma2:64878433-64879103	intergenic	9.0805	crovir-transcript-13896	64853633	111.422	0.507135	25135	0.008085	0.008085	0.001229	0.009314	0.08458	0.088657	0.275089	0.168205	NonVenom	NA
scaffold-ma2	65379836	65380380	intergenic|scaffold-ma2:65379836-65380380	intergenic	15.3518	crovir-transcript-13908	65498558	155.633	0.360964	118450	0.00671	0.00671	0.001229	0.00794	0.121886	0.095421	0.120727	0.039358	NonVenom	NA
scaffold-ma2	65380903	65381384	intergenic|scaffold-ma2:65380903-65381384	intergenic	10.845	crovir-transcript-13908	65498558	155.633	0.360964	117414	0.00671	0.00671	0.001229	0.00794	0.086104	0.067408	0.085939	0.028017	NonVenom	NA
scaffold-ma2	65463777	65464147	intergenic|scaffold-ma2:65463777-65464147	intergenic	9.89756	crovir-transcript-13908	65498558	155.633	0.360964	34596	0.007185	0.007185	0.001229	0.008414	0.08328	0.065197	0.227084	0.074032	NonVenom	NA
scaffold-ma2	68353936	68354486	intergenic|scaffold-ma2:68353936-68354486	intergenic	10.7975	crovir-transcript-13926	68357688	393.061	0.978199	3477	0.072953	0.072953	0.001229	0.074182	0.800982	0.231237	1.33281	0.23914	NonVenom	NA
scaffold-ma2	72971589	72971886	genic|scaffold-ma2:72971589-72971886	genic	2.32301	crovir-transcript-13973	72976972	495.434	0.419749	5234.5	0.068713	0.068713	0.001229	0.069942	0.162476	0.100147	0.275537	0.073463	NonVenom	NA
scaffold-ma2	72972652	72972865	genic|scaffold-ma2:72972652-72972865	genic	1.6745	crovir-transcript-13973	72976972	495.434	0.419749	4213.5	0.068713	0.068713	0.001229	0.069942	0.117118	0.072189	0.206694	0.055108	NonVenom	NA
scaffold-ma2	73019838	73020473	intergenic|scaffold-ma2:73019838-73020473	intergenic	19.4198	crovir-transcript-13973	72976972	495.434	0.419749	43183.5	0.003158	0.003158	0.001229	0.004388	0.085206	0.052519	0.367393	0.097953	NonVenom	NA
scaffold-ma2	73070528	73071043	intergenic|scaffold-ma2:73070528-73071043	intergenic	7.36914	crovir-transcript-13969	73079963	1096.22	0.984029	9177.5	0.036822	0.036822	0.001229	0.038051	0.280401	0.065607	0.536324	0.063172	NonVenom	NA
scaffold-ma2	73075460	73075916	intergenic|scaffold-ma2:73075460-73075916	intergenic	4.58373	crovir-transcript-13969	73079963	1096.22	0.984029	4275	0.049856	0.049856	0.001229	0.051085	0.234162	0.054788	0.565798	0.066643	NonVenom	NA
scaffold-ma2	73078876	73079027	intergenic|scaffold-ma2:73078876-73079027	intergenic	4.53331	crovir-transcript-13969	73079963	1096.22	0.984029	1011.5	0.049856	0.049856	0.001229	0.051085	0.231586	0.054185	0.559574	0.06591	NonVenom	NA
scaffold-ma2	73083097	73083803	intergenic|scaffold-ma2:73083097-73083803	intergenic	5.43267	crovir-transcript-13969	73079963	1096.22	0.984029	3487	0.049856	0.049856	0.001229	0.051085	0.27753	0.064935	0.670587	0.078986	NonVenom	NA
scaffold-ma2	73747543	73747810	intergenic|scaffold-ma2:73747543-73747810	intergenic	104.606	crovir-transcript-13973	72976972	495.434	0.419749	770704	0	0	0.001229	0.001229	0.128582	0.079255	0.161282	0.043	NonVenom	NA
scaffold-ma2	82469577	82470155	intergenic|scaffold-ma2:82469577-82470155	intergenic	20.7896	crovir-transcript-14052	82445209	114.436	0.917228	24657	0.007679	0.007679	0.001229	0.008908	0.185189	0.054996	0.640419	0.12789	NonVenom	NA
scaffold-ma2	82472251	82472685	intergenic|scaffold-ma2:82472251-82472685	intergenic	17.5663	crovir-transcript-14052	82445209	114.436	0.917228	27259	0.009675	0.009675	0.001229	0.010904	0.191541	0.056882	0.495901	0.09903	NonVenom	NA
scaffold-ma2	83419254	83420183	intergenic|scaffold-ma2:83419254-83420183	intergenic	29.736	crovir-transcript-14066	83371392	163.154	0.272667	48326.5	0.012847	0.012847	0.001229	0.014076	0.418559	0.275566	0.510099	0.273949	NonVenom	NA
scaffold-ma2	84934984	84935705	intergenic|scaffold-ma2:84934984-84935705	intergenic	20.1165	crovir-transcript-14132	88770637	167.802	0.348242	3.83529e+06	0.002899	0.002899	0.000382	0.00328	0.065991	0.06335	0.007678	0.004121	NonVenom	NA
scaffold-ma2	87169994	87170472	intergenic|scaffold-ma2:87169994-87170472	intergenic	2.86318	crovir-transcript-14115	87157759	208.004	0.799296	12474	0.018225	0.018225	0.001229	0.019454	0.055701	0.061401	0.159557	0.101384	NonVenom	NA
scaffold-ma2	88774504	88774817	intergenic|scaffold-ma2:88774504-88774817	intergenic	1.36182	crovir-transcript-14132	88770637	167.802	0.348242	4023.5	0.06202	0.06202	0.001229	0.063249	0.086134	0.082687	0.168097	0.090209	NonVenom	NA
scaffold-ma2	88777207	88777575	intergenic|scaffold-ma2:88777207-88777575	intergenic	4.53295	crovir-transcript-14132	88770637	167.802	0.348242	6754	0.024316	0.024316	0.001229	0.025546	0.115797	0.111162	0.430753	0.231163	NonVenom	NA
scaffold-ma2	90045238	90045686	intergenic|scaffold-ma2:90045238-90045686	intergenic	8.35081	crovir-transcript-14150	90077086	282.812	0.96326	31624	0.015688	0.015688	0.001229	0.016917	0.141274	0.051434	0.207168	0.043249	NonVenom	NA
scaffold-ma2	90078851	90079137	genic|scaffold-ma2:90078851-90079137	genic	4.8006	crovir-transcript-14150	90077086	282.812	0.96326	1908	0.06747	0.06747	0.001229	0.0687	0.329799	0.120071	0.592568	0.123705	NonVenom	NA
scaffold-ma2	90081860	90082221	genic|scaffold-ma2:90081860-90082221	genic	7.02853	crovir-transcript-14150	90077086	282.812	0.96326	4954.5	0.06747	0.06747	0.001229	0.0687	0.482856	0.175795	0.867573	0.181115	NonVenom	NA
scaffold-ma2	91321150	91321335	intergenic|scaffold-ma2:91321150-91321335	intergenic	0.841087	crovir-transcript-14159	91318765	176.689	0.478199	2477.5	0.091546	0.091546	0.001229	0.092775	0.078032	0.06135	0.10382	0.053966	NonVenom	NA
scaffold-ma2	91323238	91323450	intergenic|scaffold-ma2:91323238-91323450	intergenic	1.20116	crovir-transcript-14159	91318765	176.689	0.478199	4579	0.091546	0.091546	0.001229	0.092775	0.111438	0.087614	0.148267	0.077069	NonVenom	NA
scaffold-ma2	91371163	91371763	intergenic|scaffold-ma2:91371163-91371763	intergenic	7.81177	crovir-transcript-14159	91318765	176.689	0.478199	52698	0.015512	0.015512	0.001229	0.016741	0.130776	0.102817	0.12428	0.064601	NonVenom	NA
scaffold-ma2	91966403	91966747	genic|scaffold-ma2:91966403-91966747	genic	6.43418	crovir-transcript-14165	91965432	260.64	0.955062	1143	0.065859	0.065859	0.001229	0.067088	0.431654	0.127383	0.794209	0.150051	NonVenom	NA
scaffold-ma2	94502155	94502687	intergenic|scaffold-ma2:94502155-94502687	intergenic	9.48364	crovir-transcript-14231	94529826	115.003	0.21534	27405	0.009602	0.009602	0.001229	0.010831	0.102716	0.054829	0.266484	0.074902	NonVenom	NA
scaffold-ma2	94523987	94524387	intergenic|scaffold-ma2:94523987-94524387	intergenic	4.07905	crovir-transcript-14231	94529826	115.003	0.21534	5639	0.063907	0.063907	0.001229	0.065137	0.265696	0.141826	0.45349	0.127465	NonVenom	NA
scaffold-ma2	94732187	94732412	intergenic|scaffold-ma2:94732187-94732412	intergenic	1.90573	crovir-transcript-14246	94728818	181.892	0.512722	3481.5	0.041655	0.041655	0.001229	0.042884	0.081726	0.05683	0.235236	0.105846	NonVenom	NA
scaffold-ma2	95267242	95268201	genic|scaffold-ma2:95267242-95268201	genic	13.1923	crovir-transcript-14251	95279170	135.834	0.499727	11448.5	0.014599	0.014599	0.001229	0.015829	0.208816	0.112967	0.792131	0.240458	NonVenom	NA
scaffold-ma2	95270974	95271384	genic|scaffold-ma2:95270974-95271384	genic	3.4352	crovir-transcript-14251	95279170	135.834	0.499727	7991	0.059222	0.059222	0.001229	0.060451	0.207661	0.112342	0.282009	0.085606	NonVenom	NA
scaffold-ma2	95282216	95282356	intergenic|scaffold-ma2:95282216-95282356	intergenic	1.66221	crovir-transcript-14251	95279170	135.834	0.499727	3116	0.065475	0.065475	0.001229	0.066704	0.110877	0.059983	0.205177	0.062283	NonVenom	NA
scaffold-ma2	95338211	95338820	intergenic|scaffold-ma2:95338211-95338820	intergenic	11.8431	crovir-transcript-14251	95279170	135.834	0.499727	59345.5	0.007274	0.007274	0.001229	0.008503	0.100701	0.054478	0.169916	0.05158	NonVenom	NA
scaffold-ma2	97494267	97494825	intergenic|scaffold-ma2:97494267-97494825	intergenic	9.06086	crovir-transcript-14290	97501343	114.287	0.146171	6797	0.0187	0.0187	0.001229	0.01993	0.180579	0.127363	0.856287	0.272348	NonVenom	NA
scaffold-ma2	97657839	97658543	genic|scaffold-ma2:97657839-97658543	genic	21.9245	crovir-transcript-14291	97650264	279.355	0.946135	7927	0.041759	0.041759	0.001229	0.042988	0.942486	0.320369	1.8125	0.307648	NonVenom	NA
scaffold-ma2	97657839	97658543	genic|scaffold-ma2:97657839-97658543	genic	21.9245	crovir-transcript-14315	97872361	149.747	0.880124	214170	0.004053	0.004053	0.001229	0.005282	0.115808	0.051542	0.102989	0.025386	NonVenom	NA
scaffold-ma2	97657839	97658543	genic|scaffold-ma2:97657839-97658543	genic	21.9245	crovir-transcript-14309	97935569	352.491	0.581891	277378	0.002064	0.002064	0.001229	0.003294	0.072209	0.054227	0.082239	0.039222	NonVenom	NA
scaffold-ma2	98490786	98490980	genic|scaffold-ma2:98490786-98490980	genic	1.95961	crovir-transcript-14321	98492202	113.804	0.810166	1319	0.071413	0.071413	0.001229	0.072643	0.142351	0.065173	0.241886	0.083252	NonVenom	NA
scaffold-ma2	98493570	98493714	intergenic|scaffold-ma2:98493570-98493714	intergenic	3.00555	crovir-transcript-14321	98492202	113.804	0.810166	1440	0.071413	0.071413	0.001229	0.072643	0.21833	0.099959	0.370993	0.127688	NonVenom	NA
scaffold-ma2	100082306	100082960	intergenic|scaffold-ma2:100082306-100082960	intergenic	21.2046	crovir-transcript-14338	100134754	116.093	0.957612	52121	0.008522	0.008522	0.001229	0.009751	0.206766	0.053602	0.340599	0.051674	NonVenom	NA
scaffold-ma2	100132984	100133415	genic|scaffold-ma2:100132984-100133415	genic	11.5003	crovir-transcript-14338	100134754	116.093	0.957612	1554.5	0.075287	0.075287	0.001229	0.076517	0.879961	0.228121	1.41955	0.215368	NonVenom	NA
scaffold-ma2	100135785	100136056	intergenic|scaffold-ma2:100135785-100136056	intergenic	5.7536	crovir-transcript-14338	100134754	116.093	0.957612	1166.5	0.075287	0.075287	0.001229	0.076517	0.440246	0.114129	0.710202	0.107749	NonVenom	NA
scaffold-ma2	102201672	102201927	intergenic|scaffold-ma2:102201672-102201927	intergenic	1.02535	crovir-transcript-14366	102208121	2310.32	0.774094	6321.5	0.11615	0.11615	0.001229	0.11738	0.120355	0.055229	0.10321	0.030491	NonVenom	NA
scaffold-ma2	102287526	102287941	intergenic|scaffold-ma2:102287526-102287941	intergenic	8.1763	crovir-transcript-14366	102208121	2310.32	0.774094	79612.5	0.013167	0.013167	0.001229	0.014396	0.11771	0.054015	0.090849	0.026839	NonVenom	NA
scaffold-ma2	103971607	103972354	intergenic|scaffold-ma2:103971607-103972354	intergenic	17.4736	crovir-transcript-14371	104276686	648.191	0.742272	304706	0.00441	0.00441	0.001229	0.005639	0.098535	0.064146	0.060398	0.021123	NonVenom	NA
scaffold-ma2	104026303	104026795	intergenic|scaffold-ma2:104026303-104026795	intergenic	5.61518	crovir-transcript-14371	104276686	648.191	0.742272	250137	0.013962	0.013962	0.001229	0.015191	0.085301	0.055531	0.023045	0.008059	NonVenom	NA
scaffold-ma2	104232541	104233442	intergenic|scaffold-ma2:104232541-104233442	intergenic	13.5759	crovir-transcript-14371	104276686	648.191	0.742272	43694.5	0.005232	0.005232	0.001229	0.006461	0.08771	0.057099	0.254221	0.088907	NonVenom	NA
scaffold-ma2	104273272	104273677	intergenic|scaffold-ma2:104273272-104273677	intergenic	4.01776	crovir-transcript-14371	104276686	648.191	0.742272	3211.5	0.031206	0.031206	0.001229	0.032435	0.130317	0.084837	0.495936	0.173442	NonVenom	NA
scaffold-ma2	104331359	104331938	intergenic|scaffold-ma2:104331359-104331938	intergenic	8.79293	crovir-transcript-14370	104341853	750.552	0.596344	10204.5	0.026521	0.026521	0.001229	0.02775	0.244003	0.088964	0.583538	0.147762	NonVenom	NA
scaffold-ma2	104343927	104344378	genic|scaffold-ma2:104343927-104344378	genic	5.20715	crovir-transcript-14370	104341853	750.552	0.596344	2299.5	0.076197	0.076197	0.001229	0.077426	0.40317	0.146997	0.64275	0.162756	NonVenom	NA
scaffold-ma2	104345515	104345762	genic|scaffold-ma2:104345515-104345762	genic	3.97254	crovir-transcript-14370	104341853	750.552	0.596344	3785.5	0.076197	0.076197	0.001229	0.077426	0.307579	0.112144	0.490355	0.124167	NonVenom	NA
scaffold-ma2	104348957	104349412	intergenic|scaffold-ma2:104348957-104349412	intergenic	4.27745	crovir-transcript-14370	104341853	750.552	0.596344	7331.5	0.076197	0.076197	0.001229	0.077426	0.331187	0.120752	0.378475	0.095837	NonVenom	NA
scaffold-ma2	108250435	108251023	intergenic|scaffold-ma2:108250435-108251023	intergenic	23.3076	crovir-transcript-14421	108251690	1112.05	0.892694	961	0.078267	0.078267	0.001229	0.079497	1.85288	0.394144	2.877	0.349441	NonVenom	NA
scaffold-ma2	108617010	108617388	intergenic|scaffold-ma2:108617010-108617388	intergenic	8.30133	crovir-transcript-14427	108641083	129.884	0.487885	23884	0.01471	0.01471	0.001229	0.015939	0.132319	0.063099	0.262906	0.079322	NonVenom	NA
scaffold-ma2	108641992	108642267	intergenic|scaffold-ma2:108641992-108642267	intergenic	1.97758	crovir-transcript-14427	108641083	129.884	0.487885	1046.5	0.065894	0.065894	0.001229	0.067123	0.132741	0.063301	0.244104	0.073649	NonVenom	NA
scaffold-ma2	110196674	110197104	intergenic|scaffold-ma2:110196674-110197104	intergenic	12.4805	crovir-transcript-14451	110184194	280.151	0.97996	12695	0.05207	0.05207	0.001229	0.053299	0.665198	0.14749	0.684958	0.137582	NonVenom	NA
scaffold-ma2	110198721	110198968	intergenic|scaffold-ma2:110198721-110198968	intergenic	4.37929	crovir-transcript-14451	110184194	280.151	0.97996	14650.5	0.05207	0.05207	0.001229	0.053299	0.233411	0.051753	0.212182	0.042619	NonVenom	NA
scaffold-ma2	111163081	111163267	intergenic|scaffold-ma2:111163081-111163267	intergenic	2.12797	crovir-transcript-14457	111167724	160.229	0.707901	4550	0.104515	0.104515	0.001229	0.105745	0.225022	0.144532	0.262668	0.086181	NonVenom	NA
scaffold-ma2	111175165	111175563	genic|scaffold-ma2:111175165-111175563	genic	8.0914	crovir-transcript-14457	111167724	160.229	0.707901	7640	0.021817	0.021817	0.001229	0.023046	0.186473	0.119772	0.690724	0.226626	NonVenom	NA
scaffold-ma2	111187942	111188390	intergenic|scaffold-ma2:111187942-111188390	intergenic	6.265	crovir-transcript-14457	111167724	160.229	0.707901	20442	0.014128	0.014128	0.001229	0.015357	0.09621	0.061796	0.227179	0.074537	NonVenom	NA
scaffold-ma2	113551874	113552795	intergenic|scaffold-ma2:113551874-113552795	intergenic	29.9885	crovir-transcript-14491	114068251	103.14	0.07008	515916	0	0	0.001229	0.001229	0.036862	0.059671	0.065559	0.071779	NonVenom	NA
scaffold-ma2	115981316	115981661	genic|scaffold-ma2:115981316-115981661	genic	4.4272	crovir-transcript-14521	115986998	140.718	0.68701	5509.5	0.036132	0.036132	0.001229	0.037362	0.165407	0.199032	0.502243	0.257537	NonVenom	NA
scaffold-ma2	116191534	116191692	genic|scaffold-ma2:116191534-116191692	genic	2.32964	crovir-transcript-14505	116190594	396.304	0.91905	1019	0.075452	0.075452	0.001229	0.076681	0.178639	0.075616	0.287562	0.07408	NonVenom	NA
scaffold-ma2	116311468	116311931	intergenic|scaffold-ma2:116311468-116311931	intergenic	6.1429	crovir-transcript-14509	116222207	170.369	0.608915	89492.5	0.010178	0.010178	0.001229	0.011407	0.070073	0.071836	0.06165	0.034588	NonVenom	NA
scaffold-ma2	116666535	116666669	intergenic|scaffold-ma2:116666535-116666669	intergenic	1.6719	crovir-transcript-14523	116661026	110.982	0.489008	5576	0.060804	0.060804	0.001229	0.062034	0.103714	0.057651	0.187699	0.069141	NonVenom	NA
scaffold-ma2	116667762	116668206	intergenic|scaffold-ma2:116667762-116668206	intergenic	7.1473	crovir-transcript-14523	116661026	110.982	0.489008	6958	0.060804	0.060804	0.001229	0.062034	0.443373	0.246456	0.661832	0.243792	NonVenom	NA
scaffold-ma2	116667762	116668206	intergenic|scaffold-ma2:116667762-116668206	intergenic	7.1473	crovir-transcript-14549	116738533	113.358	0.406692	70549	0.015575	0.015575	0.001229	0.016804	0.120101	0.077244	0.088221	0.017136	NonVenom	NA
scaffold-ma2	116697586	116698473	intergenic|scaffold-ma2:116697586-116698473	intergenic	11.7756	crovir-transcript-14523	116661026	110.982	0.489008	37003.5	0.007528	0.007528	0.001229	0.008757	0.103124	0.057323	0.254815	0.093863	NonVenom	NA
scaffold-ma2	116697586	116698473	intergenic|scaffold-ma2:116697586-116698473	intergenic	11.7756	crovir-transcript-14549	116738533	113.358	0.406692	40503.5	0.011998	0.011998	0.001229	0.013227	0.155762	0.10018	0.235547	0.045754	NonVenom	NA
scaffold-ma2	116732028	116732317	intergenic|scaffold-ma2:116732028-116732317	intergenic	2.53881	crovir-transcript-14548	116723775	105.25	0.354467	8397.5	0.031069	0.031069	0.001229	0.032298	0.081998	0.05268	0.199617	0.056915	NonVenom	NA
scaffold-ma2	116733316	116733729	intergenic|scaffold-ma2:116733316-116733729	intergenic	8.0714	crovir-transcript-14548	116723775	105.25	0.354467	9747.5	0.031069	0.031069	0.001229	0.032298	0.26069	0.167481	0.557435	0.158937	NonVenom	NA
scaffold-ma2	116733316	116733729	intergenic|scaffold-ma2:116733316-116733729	intergenic	8.0714	crovir-transcript-14549	116738533	113.358	0.406692	5010.5	0.013057	0.013057	0.001229	0.014286	0.115311	0.074163	0.994485	0.193173	NonVenom	NA
scaffold-ma2	116734428	116735093	intergenic|scaffold-ma2:116734428-116735093	intergenic	12.2866	crovir-transcript-14523	116661026	110.982	0.489008	73734.5	0.009363	0.009363	0.001229	0.010592	0.130142	0.072342	0.14594	0.053758	NonVenom	NA
scaffold-ma2	116734428	116735093	intergenic|scaffold-ma2:116734428-116735093	intergenic	12.2866	crovir-transcript-14548	116723775	105.25	0.354467	10985.5	0.031069	0.031069	0.001229	0.032298	0.396832	0.254946	0.764726	0.218039	NonVenom	NA
scaffold-ma2	116734428	116735093	intergenic|scaffold-ma2:116734428-116735093	intergenic	12.2866	crovir-transcript-14549	116738533	113.358	0.406692	3772.5	0.013057	0.013057	0.001229	0.014286	0.175531	0.112894	1.51661	0.294593	NonVenom	NA
scaffold-ma2	116995013	116995405	genic|scaffold-ma2:116995013-116995405	genic	7.41684	crovir-transcript-14528	116999966	226.375	0.954029	4757	0.050651	0.050651	0.001229	0.05188	0.384789	0.214687	0.915506	0.276579	NonVenom	NA
scaffold-ma2	117001551	117001999	genic|scaffold-ma2:117001551-117001999	genic	2.96893	crovir-transcript-14528	116999966	226.375	0.954029	1809	0.050651	0.050651	0.001229	0.05188	0.154029	0.085938	0.366473	0.110713	NonVenom	NA
scaffold-ma2	117457264	117457736	intergenic|scaffold-ma2:117457264-117457736	intergenic	6.41716	crovir-transcript-14535	117458450	128.066	0.672436	950	0.05188	0.05188	0.001229	0.053109	0.340807	0.28859	0.792108	0.358058	NonVenom	NA
scaffold-ma2	118226116	118226656	intergenic|scaffold-ma2:118226116-118226656	intergenic	7.93173	crovir-transcript-14557	118219098	264.001	0.918929	7288	0.013481	0.013481	0.001229	0.01471	0.116675	0.064667	0.705454	0.197366	NonVenom	NA
scaffold-ma2	120567542	120567676	intergenic|scaffold-ma2:120567542-120567676	intergenic	2.13936	crovir-transcript-14593	120573337	364.789	0.938787	5728	0.072494	0.072494	0.001229	0.073723	0.15772	0.070259	0.234627	0.0657	NonVenom	NA
scaffold-ma2	120569108	120569292	intergenic|scaffold-ma2:120569108-120569292	intergenic	3.62611	crovir-transcript-14593	120573337	364.789	0.938787	4137	0.072494	0.072494	0.001229	0.073723	0.267328	0.119086	0.447593	0.125335	NonVenom	NA
scaffold-ma2	120595917	120596301	intergenic|scaffold-ma2:120595917-120596301	intergenic	6.25483	crovir-transcript-14594	120603420	389.639	0.842108	7311	0.039884	0.039884	0.001229	0.041113	0.257158	0.159539	0.554786	0.18659	NonVenom	NA
scaffold-ma2	120596860	120597013	intergenic|scaffold-ma2:120596860-120597013	intergenic	2.47551	crovir-transcript-14594	120603420	389.639	0.842108	6483.5	0.039884	0.039884	0.001229	0.041113	0.101777	0.063141	0.243755	0.081981	NonVenom	NA
scaffold-ma2	120602100	120602333	intergenic|scaffold-ma2:120602100-120602333	intergenic	1.01361	crovir-transcript-14594	120603420	389.639	0.842108	1203.5	0.120737	0.120737	0.001229	0.121966	0.123625	0.076696	0.125116	0.04208	NonVenom	NA
scaffold-ma2	121590460	121590792	genic|scaffold-ma2:121590460-121590792	genic	1.95247	crovir-transcript-14599	121589198	123.962	0.759883	1428	0.112238	0.112238	0.001229	0.113467	0.221541	0.158798	0.241005	0.16896	NonVenom	NA
scaffold-ma2	122951670	122951915	genic|scaffold-ma2:122951670-122951915	genic	4.11209	crovir-transcript-14621	122948930	251.952	0.995628	2862.5	0.062921	0.062921	0.001229	0.06415	0.26379	0.104557	0.507581	0.127917	NonVenom	NA
scaffold-ma2	123008627	123009177	genic|scaffold-ma2:123008627-123009177	genic	3.67935	crovir-transcript-14620	123005280	732.795	0.826501	3622	0.041739	0.041739	0.001229	0.042968	0.158096	0.085172	0.454164	0.156106	NonVenom	NA
scaffold-ma2	123031275	123031757	intergenic|scaffold-ma2:123031275-123031757	intergenic	6.06696	crovir-transcript-14620	123005280	732.795	0.826501	26236	0.014161	0.014161	0.001229	0.015391	0.093374	0.050304	0.177067	0.060862	NonVenom	NA
scaffold-ma2	123384387	123384700	intergenic|scaffold-ma2:123384387-123384700	intergenic	2.68351	crovir-transcript-14630	123383230	122.995	0.559483	1313.5	0.070695	0.070695	0.001229	0.071924	0.19301	0.134964	0.331242	0.119323	NonVenom	NA
scaffold-ma2	123385723	123385928	intergenic|scaffold-ma2:123385723-123385928	intergenic	3.39398	crovir-transcript-14630	123383230	122.995	0.559483	2595.5	0.028477	0.028477	0.001229	0.029706	0.100823	0.070501	0.418939	0.150914	NonVenom	NA
scaffold-ma2	124563231	124563462	genic|scaffold-ma2:124563231-124563462	genic	7.56074	crovir-transcript-14651	124565985	168.424	0.663144	2638.5	0.090111	0.090111	0.001229	0.09134	0.690599	0.112183	0.933268	0.115464	NonVenom	NA
scaffold-ma2	126324991	126325389	intergenic|scaffold-ma2:126324991-126325389	intergenic	8.59689	crovir-transcript-14679	126321690	1700.79	0.681727	3500	0.114138	0.114138	0.001229	0.115367	0.991802	0.447971	1.06117	0.407649	NonVenom	NA
scaffold-ma2	126617799	126618486	intergenic|scaffold-ma2:126617799-126618486	intergenic	12.7005	crovir-transcript-14673	126612358	239.235	0.42658	5784.5	0.031177	0.031177	0.001229	0.032406	0.411571	0.269731	1.38104	0.420806	NonVenom	NA
scaffold-ma2	126617799	126618486	intergenic|scaffold-ma2:126617799-126618486	intergenic	12.7005	crovir-transcript-14672	126645260	146.726	0.852979	27117.5	0.006156	0.006156	0.001229	0.007385	0.09379	0.055708	0.360164	0.137861	NonVenom	NA
scaffold-ma2	126621482	126621873	intergenic|scaffold-ma2:126621482-126621873	intergenic	7.86068	crovir-transcript-14672	126645260	146.726	0.852979	23582.5	0.012189	0.012189	0.001229	0.013418	0.105475	0.062647	0.251717	0.096351	NonVenom	NA
scaffold-ma2	127323011	127323896	intergenic|scaffold-ma2:127323011-127323896	intergenic	21.6722	crovir-transcript-14689	127330503	223.207	0.649724	7049.5	0.016231	0.016231	0.001229	0.01746	0.378399	0.207978	1.98414	0.52868	NonVenom	NA
scaffold-ma2	127450248	127450696	genic|scaffold-ma2:127450248-127450696	genic	6.52393	crovir-transcript-14696	127466090	925.13	0.720896	15618	0.021644	0.021644	0.001229	0.022874	0.149226	0.062147	0.298987	0.082845	NonVenom	NA
scaffold-ma2	127469585	127470014	intergenic|scaffold-ma2:127469585-127470014	intergenic	3.88836	crovir-transcript-14696	127466090	925.13	0.720896	3709.5	0.089852	0.089852	0.001229	0.091081	0.354155	0.147494	0.479964	0.132991	NonVenom	NA
scaffold-ma2	127471299	127471665	intergenic|scaffold-ma2:127471299-127471665	intergenic	5.43587	crovir-transcript-14696	127466090	925.13	0.720896	5392	0.083161	0.083161	0.001229	0.08439	0.458734	0.191047	0.628345	0.174106	NonVenom	NA
scaffold-ma2	127716136	127716502	intergenic|scaffold-ma2:127716136-127716502	intergenic	8.28935	crovir-transcript-14700	127722095	891.205	0.942552	5776	0.022292	0.022292	0.001229	0.023521	0.194971	0.061661	0.902528	0.178954	NonVenom	NA
scaffold-ma2	127720615	127721026	intergenic|scaffold-ma2:127720615-127721026	intergenic	7.49769	crovir-transcript-14700	127722095	891.205	0.942552	1274.5	0.087561	0.087561	0.001229	0.088791	0.665724	0.21054	0.925486	0.183506	NonVenom	NA
scaffold-ma2	128039975	128040739	intergenic|scaffold-ma2:128039975-128040739	intergenic	18.1011	crovir-transcript-14707	128037879	140.046	0.56258	2478	0.058985	0.058985	0.001229	0.060214	1.08994	0.444579	2.23433	0.549533	NonVenom	NA
scaffold-ma2	128834485	128835230	intergenic|scaffold-ma2:128834485-128835230	intergenic	5.90907	crovir-transcript-14725	128838073	123.495	0.403049	3215.5	0.143222	0.143222	0.001229	0.144451	0.853572	0.431139	0.729393	0.310158	NonVenom	NA
scaffold-ma2	129756355	129757130	intergenic|scaffold-ma2:129756355-129757130	intergenic	22.8557	crovir-transcript-14756	129754324	3147.81	0.529301	2418.5	0.076012	0.076012	0.001229	0.077241	1.76541	0.526492	2.82122	0.506998	NonVenom	NA
scaffold-ma2	129756355	129757130	intergenic|scaffold-ma2:129756355-129757130	intergenic	22.8557	crovir-transcript-14755	129772184	605.028	0.952997	15441.5	0.019484	0.019484	0.001229	0.020713	0.473407	0.12459	1.05787	0.189342	NonVenom	NA
scaffold-ma2	129771189	129771637	genic|scaffold-ma2:129771189-129771637	genic	10.9751	crovir-transcript-14755	129772184	605.028	0.952997	771	0.076461	0.076461	0.001229	0.077691	0.852662	0.224401	1.35472	0.242473	NonVenom	NA
scaffold-ma2	130529115	130529944	intergenic|scaffold-ma2:130529115-130529944	intergenic	13.8662	crovir-transcript-14762	130524368	199.106	0.503978	5161.5	0.07356	0.07356	0.001229	0.074789	1.03705	0.403033	1.66491	0.388057	NonVenom	NA
scaffold-ma2	132195613	132195953	intergenic|scaffold-ma2:132195613-132195953	intergenic	6.48237	crovir-transcript-14801	132203930	221.302	0.806097	8147	0.075029	0.075029	0.001229	0.076259	0.494336	0.17861	0.523288	0.129596	NonVenom	NA
scaffold-ma2	132712075	132712770	genic|scaffold-ma2:132712075-132712770	genic	15.1156	crovir-transcript-14841	132714162	148.305	0.591911	1739.5	0.05817	0.05817	0.001229	0.0594	0.897862	0.290827	1.86581	0.423996	NonVenom	NA
scaffold-ma2	132732239	132732620	intergenic|scaffold-ma2:132732239-132732620	intergenic	3.47056	crovir-transcript-14839	132728179	111.212	0.542175	4250.5	0.041379	0.041379	0.001229	0.042608	0.147874	0.086172	0.428392	0.120815	NonVenom	NA
scaffold-ma2	132968649	132968768	genic|scaffold-ma2:132968649-132968768	genic	1.79607	crovir-transcript-14843	132967683	425.564	0.914071	1025.5	0.149076	0.149076	0.001229	0.150305	0.269958	0.056087	0.2217	0.046424	NonVenom	NA
scaffold-ma2	133944125	133944553	intergenic|scaffold-ma2:133944125-133944553	intergenic	8.74133	crovir-transcript-14876	133943353	222.019	0.70784	986	0.065657	0.065657	0.001229	0.066886	0.584674	0.201131	1.07899	0.263287	NonVenom	NA
scaffold-ma2	133999547	134001253	intergenic|scaffold-ma2:133999547-134001253	intergenic	44.7305	crovir-transcript-14852	133672441	915.839	0.9816	327959	0.003277	0.003277	0.001229	0.004506	0.201545	0.079672	0.145031	0.034505	NonVenom	NA
scaffold-ma2	133999547	134001253	intergenic|scaffold-ma2:133999547-134001253	intergenic	44.7305	crovir-transcript-14876	133943353	222.019	0.70784	57047	0.008002	0.008002	0.001229	0.009231	0.41291	0.142043	0.664196	0.162071	NonVenom	NA
scaffold-ma2	133999547	134001253	intergenic|scaffold-ma2:133999547-134001253	intergenic	44.7305	crovir-transcript-14865	134291045	141.705	0.506073	290645	0.001544	0.001544	0.001229	0.002774	0.124061	0.064424	0.161101	0.041397	NonVenom	NA
scaffold-ma2	137911699	137912038	genic|scaffold-ma2:137911699-137912038	genic	5.73753	crovir-transcript-14978	137936881	124.312	0.92318	25012.5	0.023492	0.023492	0.001229	0.024722	0.141841	0.050326	0.174556	0.041712	NonVenom	NA
scaffold-ma2	138235350	138235759	intergenic|scaffold-ma2:138235350-138235759	intergenic	2.72577	crovir-transcript-14987	138243870	11292.8	0.99581	8315.5	0.083576	0.083576	0.001229	0.084805	0.231158	0.059854	0.216153	0.036453	NonVenom	NA
scaffold-ma2	140222325	140222902	intergenic|scaffold-ma2:140222325-140222902	intergenic	11.0331	crovir-transcript-15005	139741073	434.354	0.397583	481540	0.008639	0.008639	0.001229	0.009868	0.108872	0.085435	0.025611	0.013825	NonVenom	NA
scaffold-ma2	140223278	140223638	intergenic|scaffold-ma2:140223278-140223638	intergenic	9.58192	crovir-transcript-15005	139741073	434.354	0.397583	482385	0.008639	0.008639	0.001229	0.009868	0.094552	0.074198	0.022209	0.011988	NonVenom	NA
scaffold-ma2	143138962	143139490	intergenic|scaffold-ma2:143138962-143139490	intergenic	11.5131	crovir-transcript-15049	143145182	897.183	0.70286	5956	0.027586	0.027586	0.001229	0.028815	0.331756	0.165572	1.22051	0.256527	NonVenom	NA
scaffold-ma2	143139611	143140031	intergenic|scaffold-ma2:143139611-143140031	intergenic	7.54602	crovir-transcript-15049	143145182	897.183	0.70286	5361	0.027586	0.027586	0.001229	0.028815	0.217442	0.10852	0.876648	0.184254	NonVenom	NA
scaffold-ma2	143143268	143143449	intergenic|scaffold-ma2:143143268-143143449	intergenic	2.08961	crovir-transcript-15049	143145182	897.183	0.70286	1823.5	0.053849	0.053849	0.001229	0.055078	0.115092	0.05744	0.257933	0.054212	NonVenom	NA
scaffold-ma2	143161479	143162023	genic|scaffold-ma2:143161479-143162023	genic	7.09025	crovir-transcript-15049	143145182	897.183	0.70286	16569	0.017433	0.017433	0.001229	0.018662	0.132317	0.066036	0.308654	0.064873	NonVenom	NA
scaffold-ma2	143341367	143341744	genic|scaffold-ma2:143341367-143341744	genic	6.67592	crovir-transcript-15051	143342583	257.631	0.995385	1027.5	0.070428	0.070428	0.001229	0.071657	0.478378	0.130751	0.824049	0.152725	NonVenom	NA
scaffold-ma2	143540091	143541373	intergenic|scaffold-ma2:143540091-143541373	intergenic	40.4181	crovir-transcript-15051	143342583	257.631	0.995385	198149	0.004873	0.004873	0.001229	0.006102	0.24663	0.06741	0.203148	0.03765	NonVenom	NA
scaffold-ma2	146582754	146583082	genic|scaffold-ma2:146582754-146583082	genic	9.69989	crovir-transcript-15089	146555120	487.409	0.414647	27798	0.006306	0.006306	0.001229	0.007535	0.07309	0.076684	0.269205	0.143505	NonVenom	NA
scaffold-ma2	146582754	146583082	genic|scaffold-ma2:146582754-146583082	genic	9.69989	crovir-transcript-15090	146585355	240.155	0.93326	2437	0.013994	0.013994	0.001229	0.015223	0.147666	0.065348	1.19732	0.2588	NonVenom	NA
scaffold-ma2	146588471	146589186	intergenic|scaffold-ma2:146588471-146589186	intergenic	10.7433	crovir-transcript-15090	146585355	240.155	0.93326	3473.5	0.073078	0.073078	0.001229	0.074308	0.798308	0.353281	1.32611	0.286639	NonVenom	NA
scaffold-ma2	147046251	147046508	genic|scaffold-ma2:147046251-147046508	genic	1.80935	crovir-transcript-15120	147047081	163.509	0.751199	701.5	0.072927	0.072927	0.001229	0.074156	0.134175	0.087918	0.223339	0.073022	NonVenom	NA
scaffold-ma2	147619130	147619853	intergenic|scaffold-ma2:147619130-147619853	intergenic	7.9717	crovir-transcript-15127	147706611	457.163	0.866217	87119.5	0.009688	0.009688	0.001229	0.010918	0.087032	0.050501	0.081897	0.032679	NonVenom	NA
scaffold-ma2	150497966	150498181	genic|scaffold-ma2:150497966-150498181	genic	3.89396	crovir-transcript-15194	150495828	175.668	0.836522	2245.5	0.084508	0.084508	0.001229	0.085738	0.333859	0.115296	0.480654	0.110388	NonVenom	NA
scaffold-ma2	158756319	158756805	intergenic|scaffold-ma2:158756319-158756805	intergenic	8.12679	crovir-transcript-15287	158762724	167.444	0.359993	6162	0.123014	0.123014	0.001229	0.124243	1.0097	0.564334	0.836414	0.31413	NonVenom	NA
scaffold-ma2	160237401	160237690	intergenic|scaffold-ma2:160237401-160237690	intergenic	3.91458	crovir-transcript-15295	160244645	313.909	0.399071	7099.5	0.024123	0.024123	0.001229	0.025352	0.099243	0.095231	0.356193	0.159051	NonVenom	NA
scaffold-ma2	160492701	160493189	intergenic|scaffold-ma2:160492701-160493189	intergenic	12.775	crovir-transcript-15304	160496031	128.93	0.905265	3086	0.061388	0.061388	0.001229	0.062617	0.799933	0.364133	1.57689	0.371459	NonVenom	NA
scaffold-ma2	161437007	161437655	genic|scaffold-ma2:161437007-161437655	genic	5.05787	crovir-transcript-15329	161438545	1964.46	0.909395	1214	0.069765	0.069765	0.001229	0.070995	0.359081	0.180876	0.624323	0.182831	NonVenom	NA
scaffold-ma2	161446483	161447058	intergenic|scaffold-ma2:161446483-161447058	intergenic	6.80509	crovir-transcript-15329	161438545	1964.46	0.909395	8225.5	0.026761	0.026761	0.001229	0.02799	0.190477	0.095947	0.544776	0.159536	NonVenom	NA
scaffold-ma2	161479945	161480813	intergenic|scaffold-ma2:161479945-161480813	intergenic	4.42511	crovir-transcript-15330	161489657	2649.43	0.610372	9278	0.026134	0.026134	0.001229	0.027364	0.121087	0.152922	0.319021	0.149259	NonVenom	NA
scaffold-ma2	161515209	161515857	intergenic|scaffold-ma2:161515209-161515857	intergenic	7.68257	crovir-transcript-15294	160333527	294.114	0.341076	1182006	0.005106	0.005106	0.001063	0.006169	0.047394	0.059987	0.008165	0.005687	NonVenom	NA
scaffold-ma2	161906790	161907287	intergenic|scaffold-ma2:161906790-161907287	intergenic	5.00773	crovir-transcript-15317	161910395	225.555	0.77209	3356.5	0.04912	0.04912	0.001229	0.05035	0.252138	0.201998	0.618135	0.135328	NonVenom	NA
scaffold-ma2	161917563	161918192	intergenic|scaffold-ma2:161917563-161918192	intergenic	3.04154	crovir-transcript-15317	161910395	225.555	0.77209	7482.5	0.022993	0.022993	0.001229	0.024222	0.073672	0.059021	0.264389	0.057882	NonVenom	NA
scaffold-ma2	161917563	161918192	intergenic|scaffold-ma2:161917563-161918192	intergenic	3.04154	crovir-transcript-15311	161922603	262.505	0.621121	4725.5	0.041091	0.041091	0.001229	0.04232	0.128717	0.059797	0.375436	0.086727	NonVenom	NA
scaffold-ma2	161932783	161933642	genic|scaffold-ma2:161932783-161933642	genic	15.6904	crovir-transcript-15311	161922603	262.505	0.621121	10609.5	0.012299	0.012299	0.001229	0.013528	0.212266	0.09861	1.00662	0.232533	NonVenom	NA
scaffold-ma2	161942962	161943527	genic|scaffold-ma2:161942962-161943527	genic	15.5294	crovir-transcript-15317	161910395	225.555	0.77209	32849.5	0.003118	0.003118	0.001229	0.004347	0.067513	0.054088	0.372721	0.081599	NonVenom	NA
scaffold-ma2	161942962	161943527	genic|scaffold-ma2:161942962-161943527	genic	15.5294	crovir-transcript-15311	161922603	262.505	0.621121	20641.5	0.037151	0.037151	0.001229	0.03838	0.596024	0.276888	0.558383	0.128989	NonVenom	NA
scaffold-ma2	161946151	161946563	genic|scaffold-ma2:161946151-161946563	genic	6.7095	crovir-transcript-15311	161922603	262.505	0.621121	23754	0.018191	0.018191	0.001229	0.01942	0.130297	0.06053	0.213503	0.04932	NonVenom	NA
scaffold-ma2	161947123	161947709	genic|scaffold-ma2:161947123-161947709	genic	9.39312	crovir-transcript-15311	161922603	262.505	0.621121	24813	0.018191	0.018191	0.001229	0.01942	0.182412	0.084741	0.28777	0.066476	NonVenom	NA
scaffold-ma2	162241066	162241535	genic|scaffold-ma2:162241066-162241535	genic	4.62274	crovir-transcript-15336	162232341	138.315	0.88146	8959.5	0.020229	0.020229	0.001229	0.021458	0.099194	0.066577	0.343552	0.138836	NonVenom	NA
scaffold-ma2	177176795	177177323	intergenic|scaffold-ma2:177176795-177177323	intergenic	6.85645	crovir-transcript-15440	178105622	153.94	0.313141	928563	0.004217	0.004217	0.001229	0.005446	0.037342	0.056875	0.008989	0.01351	NonVenom	NA
scaffold-ma2	178424130	178424921	intergenic|scaffold-ma2:178424130-178424921	intergenic	16.5773	crovir-transcript-15440	178105622	153.94	0.313141	318904	0.004089	0.004089	0.001229	0.005319	0.088169	0.134287	0.055075	0.082775	NonVenom	NA
scaffold-ma2	179367915	179368226	genic|scaffold-ma2:179367915-179368226	genic	5.80957	crovir-transcript-15449	179370400	171.094	0.995992	2329.5	0.057007	0.057007	0.001229	0.058236	0.338329	0.134697	0.717111	0.148715	NonVenom	NA
scaffold-ma2	182183972	182184154	intergenic|scaffold-ma2:182183972-182184154	intergenic	2.88376	crovir-transcript-15483	182183129	112.102	0.976681	934	0.027502	0.027502	0.001229	0.028732	0.082855	0.059546	0.35596	0.098618	NonVenom	NA
scaffold-ma2	182242846	182243367	intergenic|scaffold-ma2:182242846-182243367	intergenic	12.8689	crovir-transcript-15483	182183129	112.102	0.976681	59977.5	0.005708	0.005708	0.001229	0.006937	0.089268	0.064154	0.182939	0.050683	NonVenom	NA
scaffold-ma2	182242846	182243367	intergenic|scaffold-ma2:182242846-182243367	intergenic	12.8689	crovir-transcript-15482	182263709	229.946	0.14939	20602.5	0.015301	0.015301	0.001229	0.01653	0.212722	0.108394	0.463482	0.092409	NonVenom	NA
scaffold-ma2	182242846	182243367	intergenic|scaffold-ma2:182242846-182243367	intergenic	12.8689	crovir-transcript-15485	182268058	190.12	0.246614	24951.5	0.015303	0.015303	0.001229	0.016532	0.21275	0.05637	0.392349	0.068131	NonVenom	NA
scaffold-ma2	182254827	182255344	genic|scaffold-ma2:182254827-182255344	genic	2.32964	crovir-transcript-15482	182263709	229.946	0.14939	8623.5	0.086329	0.086329	0.001229	0.087558	0.203978	0.103939	0.178987	0.035687	NonVenom	NA
scaffold-ma2	182255472	182255606	genic|scaffold-ma2:182255472-182255606	genic	1.36488	crovir-transcript-15482	182263709	229.946	0.14939	8170	0.086329	0.086329	0.001229	0.087558	0.119506	0.060895	0.10991	0.021914	NonVenom	NA
scaffold-ma2	182270023	182271268	intergenic|scaffold-ma2:182270023-182271268	intergenic	31.589	crovir-transcript-15483	182183129	112.102	0.976681	87516.5	0.003439	0.003439	0.001229	0.004668	0.147455	0.105972	0.323247	0.089555	NonVenom	NA
scaffold-ma2	182270023	182271268	intergenic|scaffold-ma2:182270023-182271268	intergenic	31.589	crovir-transcript-15482	182263709	229.946	0.14939	6936.5	0.014047	0.014047	0.001229	0.015277	0.482571	0.245897	2.93299	0.584781	NonVenom	NA
scaffold-ma2	182270023	182271268	intergenic|scaffold-ma2:182270023-182271268	intergenic	31.589	crovir-transcript-15485	182268058	190.12	0.246614	2587.5	0.078676	0.078676	0.001229	0.079906	2.52414	0.668797	3.89922	0.677091	NonVenom	NA
scaffold-ma2	183583793	183584004	intergenic|scaffold-ma2:183583793-183584004	intergenic	2.14258	crovir-transcript-15488	183575414	164.571	0.904111	8484.5	0.082207	0.082207	0.001229	0.083437	0.17877	0.119584	0.166959	0.078103	NonVenom	NA
scaffold-ma2	183694000	183694480	intergenic|scaffold-ma2:183694000-183694480	intergenic	4.95874	crovir-transcript-15491	183736333	144.273	0.933989	42093	0.016921	0.016921	0.001229	0.01815	0.090003	0.057043	0.095923	0.041624	NonVenom	NA
scaffold-ma2	183739595	183739865	genic|scaffold-ma2:183739595-183739865	genic	1.7104	crovir-transcript-15491	183736333	144.273	0.933989	3397	0.067249	0.067249	0.001229	0.068478	0.117126	0.074234	0.211126	0.091615	NonVenom	NA
scaffold-ma2	184268129	184268527	genic|scaffold-ma2:184268129-184268527	genic	3.21356	crovir-transcript-15499	184267179	119.347	0.951418	1149	0.069298	0.069298	0.001229	0.070527	0.226642	0.116365	0.396669	0.136515	NonVenom	NA
scaffold-ma2	188836242	188836867	intergenic|scaffold-ma2:188836242-188836867	intergenic	13.0728	crovir-transcript-15547	188768238	127.347	0.92907	68316.5	0.005032	0.005032	0.001229	0.006261	0.081847	0.072084	0.165939	0.057346	NonVenom	NA
scaffold-ma2	188882742	188883521	intergenic|scaffold-ma2:188882742-188883521	intergenic	5.84903	crovir-transcript-15547	188768238	127.347	0.92907	114894	0.016583	0.016583	0.001229	0.017812	0.104186	0.091758	0.047233	0.016323	NonVenom	NA
scaffold-ma2	190751857	190752385	intergenic|scaffold-ma2:190751857-190752385	intergenic	56.8523	crovir-transcript-15554	191072983	164.026	0.884132	320862	0	0	0.001229	0.001229	0.069883	0.054165	0.187876	0.110227	NonVenom	NA
scaffold-ma2	193929354	193929586	intergenic|scaffold-ma2:193929354-193929586	intergenic	3.2734	crovir-transcript-15568	193928483	123.831	0.933564	987	0.081471	0.081471	0.001229	0.0827	0.27071	0.114742	0.404056	0.122641	NonVenom	NA
scaffold-ma2	193993881	193994185	intergenic|scaffold-ma2:193993881-193994185	intergenic	1.276	crovir-transcript-15565	193998224	739.196	0.357655	4191	0.056302	0.056302	0.001229	0.057531	0.07341	0.054619	0.157504	0.071087	NonVenom	NA
scaffold-ma2	196755565	196756983	intergenic|scaffold-ma2:196755565-196756983	intergenic	46.6073	crovir-transcript-15580	194410103	152.992	0.777737	2346171	0	0	0.000585	0.000585	0.027281	0.051378	0.027281	0.014265	NonVenom	NA
scaffold-ma2	201052668	201053224	intergenic|scaffold-ma2:201052668-201053224	intergenic	9.48786	crovir-transcript-15613	201228679	180.074	0.124613	175733	0.007614	0.007614	0.001229	0.008843	0.083904	0.063617	0.052938	0.021354	NonVenom	NA
scaffold-ma2	201055087	201055577	intergenic|scaffold-ma2:201055087-201055577	intergenic	30.6562	crovir-transcript-15612	201154062	214.322	0.988583	98730	0.009329	0.009329	0.001229	0.010559	0.323689	0.102028	0.282466	0.059971	NonVenom	NA
scaffold-ma2	201055087	201055577	intergenic|scaffold-ma2:201055087-201055577	intergenic	30.6562	crovir-transcript-15613	201228679	180.074	0.124613	173347	0.003448	0.003448	0.001229	0.004677	0.143393	0.108722	0.173094	0.069823	NonVenom	NA
scaffold-ma2	201233511	201233878	genic|scaffold-ma2:201233511-201233878	genic	3.00898	crovir-transcript-15613	201228679	180.074	0.124613	5015.5	0.057056	0.057056	0.001229	0.058285	0.175379	0.132974	0.370418	0.14942	NonVenom	NA
scaffold-ma2	201238540	201238982	genic|scaffold-ma2:201238540-201238982	genic	7.43457	crovir-transcript-15613	201228679	180.074	0.124613	10082	0.015838	0.015838	0.001229	0.017067	0.126884	0.096204	0.498603	0.201127	NonVenom	NA
scaffold-ma2	207573573	207573693	intergenic|scaffold-ma2:207573573-207573693	intergenic	1.3756	crovir-transcript-15668	207571073	133.593	0.303941	2560	0.075877	0.075877	0.001229	0.077106	0.106067	0.080568	0.169799	0.105988	NonVenom	NA
scaffold-ma2	207579609	207580177	intergenic|scaffold-ma2:207579609-207580177	intergenic	7.30596	crovir-transcript-15668	207571073	133.593	0.303941	8820	0.075877	0.075877	0.001229	0.077106	0.563335	0.427904	0.550425	0.343574	NonVenom	NA
scaffold-ma2	211682661	211683532	intergenic|scaffold-ma2:211682661-211683532	intergenic	17.9418	crovir-transcript-15746	211766177	300.163	0.95913	83080.5	0.003679	0.003679	0.001229	0.004909	0.08807	0.052182	0.192096	0.056914	NonVenom	NA
scaffold-ma2	214522377	214522593	intergenic|scaffold-ma2:214522377-214522593	intergenic	1.3174	crovir-transcript-15782	214525381	178.246	0.350428	2896	0.087518	0.087518	0.001229	0.088747	0.116916	0.067849	0.162615	0.058904	NonVenom	NA
scaffold-ma2	214522897	214523832	intergenic|scaffold-ma2:214522897-214523832	intergenic	9.13257	crovir-transcript-15782	214525381	178.246	0.350428	2016.5	0.087518	0.087518	0.001229	0.088747	0.81049	0.470347	1.12729	0.40834	NonVenom	NA
scaffold-ma2	216578342	216579052	intergenic|scaffold-ma2:216578342-216579052	intergenic	18.8824	crovir-transcript-15791	216594340	120.677	0.53756	15643	0.011002	0.011002	0.001229	0.012231	0.23095	0.20153	0.864162	0.312624	NonVenom	NA
scaffold-ma2	216604087	216604213	genic|scaffold-ma2:216604087-216604213	genic	9.40661	crovir-transcript-15791	216594340	120.677	0.53756	9810	0.017416	0.017416	0.001229	0.018645	0.175387	0.153045	0.646047	0.233718	NonVenom	NA
scaffold-ma2	219630934	219631578	intergenic|scaffold-ma2:219630934-219631578	intergenic	9.2616	crovir-transcript-15819	219641164	111.062	0.74537	9908	0.01265	0.01265	0.001229	0.013879	0.128542	0.07971	0.630611	0.217925	NonVenom	NA
scaffold-ma2	221153038	221153673	intergenic|scaffold-ma2:221153038-221153673	intergenic	33.6865	crovir-transcript-15870	222314905	143.47	0.42734	1.16155e+06	0	0	0.001079	0.001079	0.036349	0.061115	0.036349	0.042179	NonVenom	NA
scaffold-ma2	221153038	221153673	intergenic|scaffold-ma2:221153038-221153673	intergenic	33.6865	crovir-transcript-15878	223449286	594.969	0.584958	2.29593e+06	0.00286	0.00286	0.000596	0.003457	0.116441	0.146697	0.020093	0.009693	NonVenom	NA
scaffold-ma2	222345807	222346571	intergenic|scaffold-ma2:222345807-222346571	intergenic	9.29452	crovir-transcript-15870	222314905	143.47	0.42734	31284	0.002466	0.002466	0.001229	0.003696	0.034348	0.057751	0.232759	0.270088	NonVenom	NA
scaffold-ma2	223454861	223455493	intergenic|scaffold-ma2:223454861-223455493	intergenic	12.3952	crovir-transcript-15867	222600437	201.377	0.284691	854740	0.003194	0.003194	0.001229	0.004423	0.054822	0.063537	0.017465	0.01569	NonVenom	NA
scaffold-ma2	223454861	223455493	intergenic|scaffold-ma2:223454861-223455493	intergenic	12.3952	crovir-transcript-15874	223329456	621.018	0.959738	125721	0.00727	0.00727	0.001229	0.008499	0.105345	0.065971	0.092552	0.037422	NonVenom	NA
scaffold-ma2	223454861	223455493	intergenic|scaffold-ma2:223454861-223455493	intergenic	12.3952	crovir-transcript-15878	223449286	594.969	0.584958	5891	0.002352	0.002352	0.001229	0.003581	0.044384	0.055917	1.32662	0.639993	NonVenom	NA
scaffold-ma2	223937259	223937850	intergenic|scaffold-ma2:223937259-223937850	intergenic	13.4108	crovir-transcript-15881	224245525	221.627	0.578096	307970	0.002046	0.002046	0.001229	0.003275	0.043926	0.056624	0.045927	0.0346	NonVenom	NA
scaffold-ma2	224156698	224157407	intergenic|scaffold-ma2:224156698-224157407	intergenic	11.6447	crovir-transcript-15881	224245525	221.627	0.578096	88472.5	0.003883	0.003883	0.001229	0.005112	0.059528	0.076738	0.118038	0.088926	NonVenom	NA
scaffold-ma2	224242028	224242327	intergenic|scaffold-ma2:224242028-224242327	intergenic	1.59585	crovir-transcript-15881	224245525	221.627	0.578096	3347.5	0.089562	0.089562	0.001229	0.090791	0.144889	0.186776	0.196985	0.148402	NonVenom	NA
scaffold-ma2	224899741	224900123	intergenic|scaffold-ma2:224899741-224900123	intergenic	5.7325	crovir-transcript-15891	224901368	239.24	0.980506	1436	0.014194	0.014194	0.001229	0.015424	0.088416	0.053679	0.707598	0.248076	NonVenom	NA
scaffold-ma2	226118468	226119125	intergenic|scaffold-ma2:226118468-226119125	intergenic	7.49644	crovir-transcript-15897	225962981	114.882	0.572053	155816	0.003652	0.003652	0.001229	0.004881	0.036593	0.072827	0.046441	0.072466	NonVenom	NA
scaffold-ma2	228037347	228037759	intergenic|scaffold-ma2:228037347-228037759	intergenic	3.89246	crovir-transcript-15917	228025271	245.235	0.983786	12282	0.030604	0.030604	0.001229	0.031833	0.12391	0.071643	0.219863	0.069422	NonVenom	NA
scaffold-ma2	228079383	228079670	genic|scaffold-ma2:228079383-228079670	genic	0.588298	crovir-transcript-15914	228078711	238.39	0.611071	815.5	0.162928	0.162928	0.001229	0.164157	0.096573	0.18514	0.072617	0.059368	NonVenom	NA
scaffold-ma2	228302919	228303308	intergenic|scaffold-ma2:228302919-228303308	intergenic	7.8768	crovir-transcript-15897	225962981	114.882	0.572053	2.34013e+06	0.003567	0.003567	0.000587	0.004154	0.032719	0.065117	0.004621	0.00721	NonVenom	NA
scaffold-ma2	228458689	228459381	intergenic|scaffold-ma2:228458689-228459381	intergenic	9.49085	crovir-transcript-15924	228499999	161.042	0.983057	40964	0.007462	0.007462	0.001229	0.008692	0.08249	0.063602	0.187987	0.062563	NonVenom	NA
scaffold-ma2	228498234	228498423	intergenic|scaffold-ma2:228498234-228498423	intergenic	2.47345	crovir-transcript-15924	228499999	161.042	0.983057	1670.5	0.051554	0.051554	0.001229	0.052783	0.130556	0.100663	0.305313	0.10161	NonVenom	NA
scaffold-ma2	229958394	229958689	intergenic|scaffold-ma2:229958394-229958689	intergenic	1.39965	crovir-transcript-15949	229965203	155.161	0.746523	6661.5	0.026012	0.026012	0.001229	0.027241	0.038128	0.094343	0.13461	0.233864	NonVenom	NA
scaffold-Z	2243850	2244303	intergenic|scaffold-Z:2243850-2244303	intergenic	6.16324	crovir-transcript-1728	2339591	134.65	0.562428	95514.5	0.008452	0.008452	0.001229	0.009681	0.059668	0.108167	0.058448	0.053139	NonVenom	NA
scaffold-Z	2346578	2347277	intergenic|scaffold-Z:2346578-2347277	intergenic	5.22204	crovir-transcript-1728	2339591	134.65	0.562428	7336.5	0.014304	0.014304	0.001229	0.015533	0.081115	0.147045	0.46178	0.419838	NonVenom	NA
scaffold-Z	3403825	3404363	intergenic|scaffold-Z:3403825-3404363	intergenic	7.85198	crovir-transcript-1740	3433760	479.668	0.3272	29666	0.006653	0.006653	0.001229	0.007882	0.061891	0.102016	0.205931	0.153538	NonVenom	NA
scaffold-Z	3414960	3415344	intergenic|scaffold-Z:3414960-3415344	intergenic	6.77929	crovir-transcript-1740	3433760	479.668	0.3272	18608	0.008622	0.008622	0.001229	0.009851	0.066785	0.110082	0.266776	0.198903	NonVenom	NA
scaffold-Z	6412095	6412530	genic|scaffold-Z:6412095-6412530	genic	5.71095	crovir-transcript-1775	6408070	218.482	0.85644	4242.5	0.030939	0.030939	0.001229	0.032168	0.183709	0.139153	0.704937	0.359576	NonVenom	NA
scaffold-Z	12975934	12976627	genic|scaffold-Z:12975934-12976627	genic	16.0439	crovir-transcript-1809	13072015	123.628	0.166636	95734.5	0.00294	0.00294	0.001229	0.004169	0.066887	0.055113	0.151844	0.062845	NonVenom	NA
scaffold-Z	13004369	13005392	intergenic|scaffold-Z:13004369-13005392	intergenic	30.9429	crovir-transcript-1812	13006693	126.006	0.233254	1812.5	0.112568	0.112568	0.001229	0.113797	3.5212	0.688373	3.81947	0.489854	NonVenom	NA
scaffold-Z	13004369	13005392	intergenic|scaffold-Z:13004369-13005392	intergenic	30.9429	crovir-transcript-1809	13072015	123.628	0.166636	67134.5	0.005154	0.005154	0.001229	0.006384	0.197524	0.162755	0.398781	0.165048	NonVenom	NA
scaffold-Z	13023563	13024143	genic|scaffold-Z:13023563-13024143	genic	8.50267	crovir-transcript-1812	13006693	126.006	0.233254	17160	0.032444	0.032444	0.001229	0.033673	0.286309	0.055972	0.359025	0.046046	NonVenom	NA
scaffold-Z	13023563	13024143	genic|scaffold-Z:13023563-13024143	genic	8.50267	crovir-transcript-1810	13065140	193.977	0.169369	41287	0.00573	0.00573	0.001229	0.006959	0.059172	0.06086	0.167267	0.067299	NonVenom	NA
scaffold-Z	13023563	13024143	genic|scaffold-Z:13023563-13024143	genic	8.50267	crovir-transcript-1809	13072015	123.628	0.166636	48162	0.007698	0.007698	0.001229	0.008927	0.075904	0.062543	0.14629	0.060547	NonVenom	NA
scaffold-Z	13031024	13031343	genic|scaffold-Z:13031024-13031343	genic	2.52326	crovir-transcript-1810	13065140	193.977	0.169369	33956.5	0.023207	0.023207	0.001229	0.024436	0.061658	0.063417	0.05884	0.023674	NonVenom	NA
scaffold-Z	13139065	13139528	intergenic|scaffold-Z:13139065-13139528	intergenic	12.8395	crovir-transcript-1809	13072015	123.628	0.166636	67281.5	0.004932	0.004932	0.001229	0.006161	0.079104	0.06518	0.165156	0.068355	NonVenom	NA
scaffold-Z	13232608	13233578	intergenic|scaffold-Z:13232608-13233578	intergenic	56.207	crovir-transcript-1810	13065140	193.977	0.169369	167953	0.000784	0.000784	0.001229	0.002013	0.113132	0.116358	0.326209	0.131249	NonVenom	NA
scaffold-Z	13232608	13233578	intergenic|scaffold-Z:13232608-13233578	intergenic	56.207	crovir-transcript-1809	13072015	123.628	0.166636	161078	0.000702	0.000702	0.001229	0.001931	0.108534	0.08943	0.338289	0.140011	NonVenom	NA
scaffold-Z	15606284	15606645	intergenic|scaffold-Z:15606284-15606645	intergenic	68.3446	crovir-transcript-1839	16770929	113.412	0.994656	1.16446e+06	0.002329	0.002329	0.001077	0.003405	0.232739	0.071443	0.073586	0.017433	NonVenom	NA
scaffold-Z	16769517	16769923	genic|scaffold-Z:16769517-16769923	genic	2.59869	crovir-transcript-1839	16770929	113.412	0.994656	1209	0.085604	0.085604	0.001229	0.086833	0.225654	0.069268	0.320772	0.075995	NonVenom	NA
scaffold-Z	16771980	16772150	intergenic|scaffold-Z:16771980-16772150	intergenic	2.84558	crovir-transcript-1839	16770929	113.412	0.994656	1136	0.087596	0.087596	0.001229	0.088825	0.252759	0.077588	0.351247	0.083214	NonVenom	NA
scaffold-Z	16865161	16865614	intergenic|scaffold-Z:16865161-16865614	intergenic	9.5704	crovir-transcript-1844	16861261	223.204	0.131657	4126.5	0.043045	0.043045	0.001229	0.044274	0.42372	0.261276	1.18133	0.387541	NonVenom	NA
scaffold-Z	18337776	18338492	genic|scaffold-Z:18337776-18338492	genic	14.8666	crovir-transcript-1873	18325265	321.255	0.026902	12869	0.00907	0.00907	0.001229	0.0103	0.153119	0.175516	0.806307	0.411058	NonVenom	NA
scaffold-Z	19592382	19592833	intergenic|scaffold-Z:19592382-19592833	intergenic	3.34163	crovir-transcript-1884	19595514	260.119	0.208447	2906.5	0.03055	0.03055	0.001229	0.031779	0.106194	0.154284	0.412477	0.348837	NonVenom	NA
scaffold-Z	20354389	20354649	intergenic|scaffold-Z:20354389-20354649	intergenic	3.36672	crovir-transcript-1899	20348320	113.048	0.322797	6199	0.040193	0.040193	0.001229	0.041422	0.139457	0.13615	0.344705	0.175361	NonVenom	NA
scaffold-Z	20354762	20355068	intergenic|scaffold-Z:20354762-20355068	intergenic	6.43418	crovir-transcript-1899	20348320	113.048	0.322797	6595	0.040193	0.040193	0.001229	0.041422	0.266518	0.260199	0.624224	0.31756	NonVenom	NA
scaffold-Z	20949012	20949659	genic|scaffold-Z:20949012-20949659	genic	5.58252	crovir-transcript-1902	20952735	151.652	0.778587	3399.5	0.111204	0.111204	0.001229	0.112434	0.627662	0.453211	0.689084	0.434812	NonVenom	NA
scaffold-Z	20950538	20950756	genic|scaffold-Z:20950538-20950756	genic	1.98051	crovir-transcript-1902	20952735	151.652	0.778587	2088	0.111204	0.111204	0.001229	0.112434	0.222676	0.160785	0.244466	0.154258	NonVenom	NA
scaffold-Z	23525099	23527132	intergenic|scaffold-Z:23525099-23527132	intergenic	31.6704	crovir-transcript-1930	23670038	169.638	0.240177	143922	0	0	0.001229	0.001229	0.038929	0.051314	0.210233	0.170283	NonVenom	NA
scaffold-Z	23525099	23527132	intergenic|scaffold-Z:23525099-23527132	intergenic	31.6704	crovir-transcript-1928	23794896	137.161	0.114532	268780	0.004099	0.004099	0.001229	0.005328	0.16873	0.152376	0.122095	0.077487	NonVenom	NA
scaffold-Z	23843119	23843740	intergenic|scaffold-Z:23843119-23843740	intergenic	20.3775	crovir-transcript-1928	23794896	137.161	0.114532	48533.5	0.002743	0.002743	0.001229	0.003972	0.080941	0.073096	0.348264	0.221024	NonVenom	NA
scaffold-Z	24013197	24013718	genic|scaffold-Z:24013197-24013718	genic	14.1135	crovir-transcript-1933	24004966	176.104	0.914435	8491.5	0.031874	0.031874	0.001229	0.033103	0.467201	0.119251	1.099	0.183196	NonVenom	NA
scaffold-Z	24013197	24013718	genic|scaffold-Z:24013197-24013718	genic	14.1135	crovir-transcript-1932	24044745	234.994	0.898585	31287.5	0.012364	0.012364	0.001229	0.013594	0.191853	0.060277	0.353405	0.075528	NonVenom	NA
scaffold-Z	24040716	24041597	intergenic|scaffold-Z:24040716-24041597	intergenic	15.8176	crovir-transcript-1932	24044745	234.994	0.898585	3588.5	0.092709	0.092709	0.001229	0.093938	1.48588	0.46684	1.95247	0.417269	NonVenom	NA
scaffold-Z	24847217	24848042	intergenic|scaffold-Z:24847217-24848042	intergenic	98.7743	crovir-transcript-1930	23670038	169.638	0.240177	1.17759e+06	0	0	0.001066	0.001066	0.105317	0.138823	0.105317	0.085305	NonVenom	NA
scaffold-Z	24847217	24848042	intergenic|scaffold-Z:24847217-24848042	intergenic	98.7743	crovir-transcript-1928	23794896	137.161	0.114532	1.05273e+06	0	0	0.001175	0.001175	0.116104	0.104851	0.116104	0.073685	NonVenom	NA
scaffold-Z	25121160	25121960	intergenic|scaffold-Z:25121160-25121960	intergenic	17.8992	crovir-transcript-1930	23670038	169.638	0.240177	1451522	0.001381	0.001381	0.000889	0.00227	0.040626	0.053551	0.01591	0.012887	NonVenom	NA
scaffold-Z	27516015	27516593	intergenic|scaffold-Z:27516015-27516593	intergenic	9.59425	crovir-transcript-1970	27496274	172.616	0.97492	20030	0.015798	0.015798	0.001229	0.017028	0.163368	0.053994	0.354121	0.107895	NonVenom	NA
scaffold-Z	28788009	28788747	intergenic|scaffold-Z:28788009-28788747	intergenic	164.287	crovir-transcript-1963	27017870	203.547	0.848849	1770508	0	0	0.000748	0.000748	0.122852	0.077042	0.122852	0.068687	NonVenom	NA
scaffold-Z	28788009	28788747	intergenic|scaffold-Z:28788009-28788747	intergenic	164.287	crovir-transcript-1970	27496274	172.616	0.97492	1292104	0	0	0.000984	0.000984	0.161583	0.053404	0.161583	0.049232	NonVenom	NA
scaffold-Z	28788009	28788747	intergenic|scaffold-Z:28788009-28788747	intergenic	164.287	crovir-transcript-1973	27896903	133.696	0.990101	891475	0	0	0.001229	0.001229	0.201941	0.05396	0.223167	0.054968	NonVenom	NA
scaffold-Z	28788009	28788747	intergenic|scaffold-Z:28788009-28788747	intergenic	164.287	crovir-transcript-2000	31973375	166.177	0.815813	3184997	0	0	0.000449	0.000449	0.073709	0.055994	0.073709	0.032889	NonVenom	NA
scaffold-Z	31091459	31092075	intergenic|scaffold-Z:31091459-31092075	intergenic	65.3335	crovir-transcript-2000	31973375	166.177	0.815813	881608	0	0	0.001229	0.001229	0.080308	0.061007	0.089612	0.039985	NonVenom	NA
scaffold-Z	32137173	32138210	intergenic|scaffold-Z:32137173-32138210	intergenic	19.8979	crovir-transcript-2000	31973375	166.177	0.815813	164316	0.003941	0.003941	0.001229	0.00517	0.102877	0.078152	0.117702	0.052519	NonVenom	NA
scaffold-Z	35977048	35977752	genic|scaffold-Z:35977048-35977752	genic	18.3304	crovir-transcript-2035	35978942	330.404	0.988158	1542	0.050852	0.050852	0.001229	0.052081	0.954675	0.281976	2.26263	0.318952	NonVenom	NA
scaffold-Z	37678142	37678290	genic|scaffold-Z:37678142-37678290	genic	1.54773	crovir-transcript-2066	37678992	641.167	0.885589	776	0.065698	0.065698	0.001229	0.066928	0.103586	0.061117	0.191045	0.077591	NonVenom	NA
scaffold-Z	41680993	41681439	genic|scaffold-Z:41680993-41681439	genic	9.98626	crovir-transcript-2091	41656322	3567.79	0.813263	24894	0.014819	0.014819	0.001229	0.016048	0.160257	0.116965	0.305075	0.134872	NonVenom	NA
scaffold-Z	49133069	49133366	intergenic|scaffold-Z:49133069-49133366	intergenic	2.31989	crovir-transcript-2170	49136719	127.374	0.418382	3501.5	0.03918	0.03918	0.001229	0.040409	0.093744	0.110745	0.286358	0.192677	NonVenom	NA
scaffold-Z	53531213	53531775	intergenic|scaffold-Z:53531213-53531775	intergenic	13.7609	crovir-transcript-2220	53587413	119.455	0.184976	55919	0.002101	0.002101	0.001229	0.00333	0.04583	0.055455	0.207914	0.097387	NonVenom	NA
scaffold-Z	53531213	53531775	intergenic|scaffold-Z:53531213-53531775	intergenic	13.7609	crovir-transcript-2226	54812444	101.048	0.127953	1280950	0.002171	0.002171	0.000991	0.003162	0.043515	0.058251	0.013637	0.010426	NonVenom	NA
scaffold-Z	53590358	53590620	genic|scaffold-Z:53590358-53590620	genic	4.68018	crovir-transcript-2220	53587413	119.455	0.184976	3076	0.017539	0.017539	0.001229	0.018768	0.087837	0.106283	0.577703	0.270595	NonVenom	NA
scaffold-Z	54785039	54786001	intergenic|scaffold-Z:54785039-54786001	intergenic	18.8551	crovir-transcript-2226	54812444	101.048	0.127953	26924	0.007681	0.007681	0.001229	0.00891	0.167995	0.224884	0.538041	0.411347	NonVenom	NA
scaffold-Z	59774777	59775233	genic|scaffold-Z:59774777-59775233	genic	2.7072	crovir-transcript-2279	59772866	803.907	0.910123	2139	0.100663	0.100663	0.001229	0.101892	0.275844	0.133506	0.334166	0.134963	NonVenom	NA
scaffold-Z	62615575	62616201	intergenic|scaffold-Z:62615575-62616201	intergenic	9.19674	crovir-transcript-2292	62539969	2053.94	0.996356	75919	0.016261	0.016261	0.001229	0.01749	0.16085	0.080042	0.106499	0.025592	NonVenom	NA
scaffold-Z	67756582	67757285	intergenic|scaffold-Z:67756582-67757285	intergenic	14.685	crovir-transcript-2318	67546222	202.735	0.124066	210712	0.002265	0.002265	0.001229	0.003495	0.051318	0.069252	0.069966	0.053595	NonVenom	NA
scaffold-Z	67818104	67818430	intergenic|scaffold-Z:67818104-67818430	intergenic	87.8915	crovir-transcript-2318	67546222	202.735	0.124066	272045	0	0	0.001229	0.001229	0.108036	0.14579	0.335297	0.256844	NonVenom	NA
scaffold-Z	67818104	67818430	intergenic|scaffold-Z:67818104-67818430	intergenic	87.8915	crovir-transcript-2321	68233407	200.123	0.976195	415140	0	0	0.001229	0.001229	0.108036	0.052455	0.232134	0.067228	NonVenom	NA
scaffold-Z	67818104	67818430	intergenic|scaffold-Z:67818104-67818430	intergenic	87.8915	crovir-transcript-2322	68233667	1126.6	0.954637	415400	0	0	0.001229	0.001229	0.108036	0.052455	0.232007	0.067193	NonVenom	NA
scaffold-Z	67818104	67818430	intergenic|scaffold-Z:67818104-67818430	intergenic	87.8915	crovir-transcript-2335	70093330	106.407	0.126435	2275063	0	0	0.000601	0.000601	0.052843	0.073206	0.052843	0.047829	NonVenom	NA
scaffold-Z	67859472	67860051	intergenic|scaffold-Z:67859472-67860051	intergenic	16.515	crovir-transcript-2321	68233407	200.123	0.976195	373646	0.006794	0.006794	0.001229	0.008024	0.132511	0.064338	0.047803	0.013844	NonVenom	NA
scaffold-Z	67859472	67860051	intergenic|scaffold-Z:67859472-67860051	intergenic	16.515	crovir-transcript-2322	68233667	1126.6	0.954637	373906	0.006794	0.006794	0.001229	0.008024	0.132511	0.064338	0.047775	0.013836	NonVenom	NA
scaffold-Z	67880880	67881605	intergenic|scaffold-Z:67880880-67881605	intergenic	28.4193	crovir-transcript-2318	67546222	202.735	0.124066	335020	0.000787	0.000787	0.001229	0.002017	0.05731	0.077338	0.090453	0.069289	NonVenom	NA
scaffold-Z	69686385	69687558	intergenic|scaffold-Z:69686385-69687558	intergenic	23.4684	crovir-transcript-2321	68233407	200.123	0.976195	1.45356e+06	0.003736	0.003736	0.000888	0.004623	0.108501	0.052681	0.020835	0.006034	NonVenom	NA
scaffold-Z	69686385	69687558	intergenic|scaffold-Z:69686385-69687558	intergenic	23.4684	crovir-transcript-2322	68233667	1126.6	0.954637	1.4533e+06	0.003736	0.003736	0.000888	0.004623	0.108504	0.052682	0.020838	0.006035	NonVenom	NA
scaffold-Z	70211412	70212069	genic|scaffold-Z:70211412-70212069	genic	9.47914	crovir-transcript-2355	70219543	143.411	0.518917	7802.5	0.090783	0.090783	0.001229	0.092012	0.872199	0.401027	0.794509	0.383108	NonVenom	NA
scaffold-Z	70213659	70213815	genic|scaffold-Z:70213659-70213815	genic	2.83216	crovir-transcript-2355	70219543	143.411	0.518917	5806	0.090783	0.090783	0.001229	0.092012	0.260594	0.119818	0.306974	0.148021	NonVenom	NA
scaffold-Z	71220854	71221263	intergenic|scaffold-Z:71220854-71221263	intergenic	28.7484	crovir-transcript-2355	70219543	143.411	0.518917	1.00152e+06	0.005158	0.005158	0.001228	0.006386	0.183587	0.084411	0.035291	0.017017	NonVenom	NA
scaffold-Z	73309509	73310337	intergenic|scaffold-Z:73309509-73310337	intergenic	25.503	crovir-transcript-2375	73297896	146.889	0.710451	12027	0.019773	0.019773	0.001229	0.021002	0.535625	0.32482	1.46705	0.314368	NonVenom	NA
scaffold-Z	73309509	73310337	intergenic|scaffold-Z:73309509-73310337	intergenic	25.503	crovir-transcript-2376	73403873	149.202	0.921662	93950	0.015668	0.015668	0.001229	0.016897	0.430928	0.134497	0.245351	0.059574	NonVenom	NA
scaffold-Z	73402479	73402672	intergenic|scaffold-Z:73402479-73402672	intergenic	2.99648	crovir-transcript-2376	73403873	149.202	0.921662	1297.5	0.158411	0.158411	0.001229	0.15964	0.478359	0.1493	0.369873	0.089809	NonVenom	NA
scaffold-Z	74080742	74081131	intergenic|scaffold-Z:74080742-74081131	intergenic	5.20349	crovir-transcript-2406	74103894	431.865	0.517763	22957.5	0.024246	0.024246	0.001229	0.025476	0.132562	0.066175	0.170567	0.048207	NonVenom	NA
scaffold-Z	74082373	74083146	intergenic|scaffold-Z:74082373-74083146	intergenic	14.4064	crovir-transcript-2406	74103894	431.865	0.517763	21134.5	0.024246	0.024246	0.001229	0.025476	0.367012	0.183211	0.507476	0.143428	NonVenom	NA
scaffold-Z	74102329	74102707	intergenic|scaffold-Z:74102329-74102707	intergenic	3.60907	crovir-transcript-2406	74103894	431.865	0.517763	1376	0.053871	0.053871	0.001229	0.0551	0.19886	0.09927	0.445489	0.125909	NonVenom	NA
scaffold-Z	74233773	74234282	intergenic|scaffold-Z:74233773-74234282	intergenic	8.354	crovir-transcript-2412	74229164	7067.67	0.659197	4863.5	0.083975	0.083975	0.001229	0.085204	0.711796	0.362746	1.03119	0.361396	NonVenom	NA
scaffold-Z	76551912	76552111	genic|scaffold-Z:76551912-76552111	genic	3.95359	crovir-transcript-2447	76556694	158.707	0.998907	4682.5	0.080008	0.080008	0.001229	0.081238	0.32118	0.080862	0.488016	0.086434	NonVenom	NA
scaffold-Z	77138883	77139418	genic|scaffold-Z:77138883-77139418	genic	6.0927	crovir-transcript-2459	77143390	154.698	0.950325	4239.5	0.109942	0.109942	0.001229	0.111171	0.677331	0.16799	0.752059	0.178298	NonVenom	NA
scaffold-Z	81927157	81927397	intergenic|scaffold-Z:81927157-81927397	intergenic	2.32964	crovir-transcript-2531	81933896	125.169	0.682881	6619	0.047984	0.047984	0.001229	0.049213	0.114649	0.075403	0.225302	0.083298	NonVenom	NA
scaffold-Z	81929132	81929606	intergenic|scaffold-Z:81929132-81929606	intergenic	3.32366	crovir-transcript-2531	81933896	125.169	0.682881	4527	0.047984	0.047984	0.001229	0.049213	0.163569	0.107576	0.41026	0.15168	NonVenom	NA
scaffold-Z	82571680	82572174	intergenic|scaffold-Z:82571680-82572174	intergenic	6.87668	crovir-transcript-2547	82557595	176.111	0.546517	14332	0.01067	0.01067	0.001229	0.0119	0.08183	0.082106	0.339615	0.204967	NonVenom	NA
scaffold-Z	82571680	82572174	intergenic|scaffold-Z:82571680-82572174	intergenic	6.87668	crovir-transcript-2549	82565239	414.269	0.158347	6688	0.073176	0.073176	0.001229	0.074405	0.511658	0.362231	0.659077	0.330107	NonVenom	NA
scaffold-Z	84521357	84521724	genic|scaffold-Z:84521357-84521724	genic	8.13259	crovir-transcript-2566	84520651	915.326	0.998178	889.5	0.043744	0.043744	0.001229	0.044973	0.365747	0.168575	1.00385	0.219647	NonVenom	NA
scaffold-Z	87976007	87976158	genic|scaffold-Z:87976007-87976158	genic	8.42916	crovir-transcript-2614	87779404	559.058	0.47076	196678	0.00368	0.00368	0.001229	0.004909	0.041379	0.055722	0.042642	0.037804	NonVenom	NA
scaffold-Z	88667169	88667319	intergenic|scaffold-Z:88667169-88667319	intergenic	2.2677	crovir-transcript-2632	88658131	449.432	0.555626	9113	0.032162	0.032162	0.001229	0.033391	0.075721	0.084375	0.166058	0.077206	NonVenom	NA
scaffold-Z	89714185	89714781	intergenic|scaffold-Z:89714185-89714781	intergenic	7.88959	crovir-transcript-2650	89715534	145.405	0.458128	1051	0.027613	0.027613	0.001229	0.028842	0.227554	0.198149	0.97386	0.42421	NonVenom	NA
scaffold-Z	90624931	90625803	intergenic|scaffold-Z:90624931-90625803	intergenic	21.9097	crovir-transcript-2665	90687600	201.826	0.931742	62233	0.002971	0.002971	0.001229	0.0042	0.092017	0.054138	0.301615	0.106315	NonVenom	NA
scaffold-Z	90757146	90757528	intergenic|scaffold-Z:90757146-90757528	intergenic	5.72681	crovir-transcript-2665	90687600	201.826	0.931742	69737	0.016772	0.016772	0.001229	0.018001	0.103087	0.060651	0.071403	0.025168	NonVenom	NA
scaffold-Z	92988379	92988491	genic|scaffold-Z:92988379-92988491	genic	1.64951	crovir-transcript-2712	92986800	230.99	0.870711	1635	0.07346	0.07346	0.001229	0.074689	0.1232	0.059875	0.203609	0.053547	NonVenom	NA
scaffold-Z	92991604	92992141	genic|scaffold-Z:92991604-92992141	genic	12.94	crovir-transcript-2712	92986800	230.99	0.870711	5072.5	0.048087	0.048087	0.001229	0.049317	0.638154	0.31014	1.57738	0.414833	NonVenom	NA
scaffold-Z	94788697	94790233	intergenic|scaffold-Z:94788697-94790233	intergenic	41.3267	crovir-transcript-2721	93967894	104.797	0.745309	821571	0	0	0.001229	0.001229	0.050799	0.052324	0.060271	0.049686	NonVenom	NA
scaffold-Z	98396211	98396762	intergenic|scaffold-Z:98396211-98396762	intergenic	7.93274	crovir-transcript-2779	98395397	148.276	0.573025	1089.5	0.066149	0.066149	0.001229	0.067379	0.534497	0.289384	0.979186	0.320213	NonVenom	NA
scaffold-Z	98398863	98399072	intergenic|scaffold-Z:98398863-98399072	intergenic	1.6539	crovir-transcript-2779	98395397	148.276	0.573025	3570.5	0.066149	0.066149	0.001229	0.067379	0.111437	0.060334	0.204151	0.066761	NonVenom	NA
scaffold-Z	98399352	98399727	intergenic|scaffold-Z:98399352-98399727	intergenic	5.16377	crovir-transcript-2779	98395397	148.276	0.573025	4142.5	0.066149	0.066149	0.001229	0.067379	0.347928	0.188373	0.637396	0.208441	NonVenom	NA
scaffold-Z	98408957	98409562	intergenic|scaffold-Z:98408957-98409562	intergenic	5.98187	crovir-transcript-2779	98395397	148.276	0.573025	13862.5	0.030962	0.030962	0.001229	0.032191	0.192561	0.104255	0.304109	0.09945	NonVenom	NA
scaffold-Z	98605059	98605651	genic|scaffold-Z:98605059-98605651	genic	4.44	crovir-transcript-2780	98614257	621.802	0.683427	8902	0.064773	0.064773	0.001229	0.066002	0.293051	0.156252	0.331824	0.11753	NonVenom	NA
scaffold-Z	98607063	98607261	genic|scaffold-Z:98607063-98607261	genic	2.42756	crovir-transcript-2780	98614257	621.802	0.683427	7095	0.064773	0.064773	0.001229	0.066002	0.160225	0.085431	0.221009	0.07828	NonVenom	NA
scaffold-Z	98618423	98619106	intergenic|scaffold-Z:98618423-98619106	intergenic	6.74367	crovir-transcript-2780	98614257	621.802	0.683427	4507.5	0.071823	0.071823	0.001229	0.073052	0.492638	0.262671	0.832412	0.294835	NonVenom	NA
scaffold-Z	100169919	100170551	intergenic|scaffold-Z:100169919-100170551	intergenic	7.26964	crovir-transcript-2790	100175982	358.728	0.525323	5747	0.051133	0.051133	0.001229	0.052362	0.380652	0.283827	0.794978	0.335243	NonVenom	NA
scaffold-Z	100613550	100613925	intergenic|scaffold-Z:100613550-100613925	intergenic	5.04652	crovir-transcript-2835	100586575	339.031	0.569138	27162.5	0.009363	0.009363	0.001229	0.010592	0.053451	0.056586	0.142905	0.070953	NonVenom	NA
scaffold-Z	100613550	100613925	intergenic|scaffold-Z:100613550-100613925	intergenic	5.04652	crovir-transcript-2834	100624319	199.12	0.803364	10581.5	0.015382	0.015382	0.001229	0.016611	0.083829	0.054361	0.324505	0.081714	NonVenom	NA
scaffold-Z	100620788	100621176	intergenic|scaffold-Z:100620788-100621176	intergenic	4.02899	crovir-transcript-2834	100624319	199.12	0.803364	3337	0.042275	0.042275	0.001229	0.043504	0.175277	0.113662	0.497322	0.125231	NonVenom	NA
scaffold-Z	100623463	100623683	intergenic|scaffold-Z:100623463-100623683	intergenic	1.81446	crovir-transcript-2834	100624319	199.12	0.803364	746	0.042275	0.042275	0.001229	0.043504	0.078936	0.051188	0.22397	0.056398	NonVenom	NA
scaffold-Z	100827192	100827732	intergenic|scaffold-Z:100827192-100827732	intergenic	5.52179	crovir-transcript-2811	100829089	371.73	0.64772	1627	0.073493	0.073493	0.001229	0.074722	0.4126	0.24584	0.681587	0.307361	NonVenom	NA
scaffold-Z	101075087	101075853	intergenic|scaffold-Z:101075087-101075853	intergenic	21.0037	crovir-transcript-2811	100829089	371.73	0.64772	246381	0.003045	0.003045	0.001229	0.004274	0.089767	0.053486	0.087341	0.039386	NonVenom	NA
scaffold-Z	101075087	101075853	intergenic|scaffold-Z:101075087-101075853	intergenic	21.0037	crovir-transcript-2843	101404006	123.983	0.499059	328536	0.002791	0.002791	0.001229	0.00402	0.084432	0.06155	0.067997	0.036317	NonVenom	NA
scaffold-Z	101424876	101425142	intergenic|scaffold-Z:101424876-101425142	intergenic	0.789009	crovir-transcript-2848	101423459	117.574	0.326107	1550	0.148715	0.148715	0.001229	0.149944	0.118307	0.089475	0.097392	0.043394	NonVenom	NA
scaffold-Z	101432298	101432822	intergenic|scaffold-Z:101432298-101432822	intergenic	5.94994	crovir-transcript-2848	101423459	117.574	0.326107	9101	0.018803	0.018803	0.001229	0.020033	0.119193	0.090145	0.4362	0.194355	NonVenom	NA
scaffold-Z	101433475	101433780	intergenic|scaffold-Z:101433475-101433780	intergenic	3.72097	crovir-transcript-2848	101423459	117.574	0.326107	10168.5	0.018803	0.018803	0.001229	0.020033	0.074541	0.056375	0.247701	0.110366	NonVenom	NA
scaffold-Z	102064033	102064324	genic|scaffold-Z:102064033-102064324	genic	3.8735	crovir-transcript-2863	102069182	537.424	0.829538	5003.5	0.085271	0.085271	0.001229	0.0865	0.335058	0.138425	0.477838	0.163307	NonVenom	NA
scaffold-Z	102204048	102204317	intergenic|scaffold-Z:102204048-102204317	intergenic	2.89149	crovir-transcript-2866	102205169	370.215	0.777434	986.5	0.120649	0.120649	0.001229	0.121878	0.352409	0.135987	0.356914	0.139722	NonVenom	NA
scaffold-Z	102209090	102209370	genic|scaffold-Z:102209090-102209370	genic	4.10777	crovir-transcript-2866	102205169	370.215	0.777434	4061	0.120649	0.120649	0.001229	0.121878	0.500647	0.193188	0.507047	0.198495	NonVenom	NA
scaffold-Z	104141672	104142486	intergenic|scaffold-Z:104141672-104142486	intergenic	16.1728	crovir-transcript-2924	104171657	299.812	0.273881	29578	0.006108	0.006108	0.001229	0.007337	0.118663	0.05958	0.425257	0.135251	NonVenom	NA
scaffold-Z	104399333	104399999	intergenic|scaffold-Z:104399333-104399999	intergenic	8.15986	crovir-transcript-2943	104397714	1718.24	0.444009	1952	0.060039	0.060039	0.001229	0.061268	0.499941	0.252932	1.00722	0.393423	NonVenom	NA
scaffold-Z	104855011	104855820	intergenic|scaffold-Z:104855011-104855820	intergenic	16.5235	crovir-transcript-2933	104850962	2547.99	0.881946	4453.5	0.051923	0.051923	0.001229	0.053153	0.878266	0.320407	2.03959	0.428198	NonVenom	NA
scaffold-Z	104918022	104918489	genic|scaffold-Z:104918022-104918489	genic	11.5705	crovir-transcript-2935	104945189	112.946	0.915649	26933.5	0.014818	0.014818	0.001229	0.016047	0.185672	0.063389	0.330068	0.078534	NonVenom	NA
scaffold-Z	105108883	105109400	intergenic|scaffold-Z:105108883-105109400	intergenic	8.16642	crovir-transcript-2989	105127445	148.631	0.489525	18303.5	0.011109	0.011109	0.001229	0.012338	0.100756	0.053758	0.326008	0.073274	NonVenom	NA
scaffold-Z	105130275	105130961	intergenic|scaffold-Z:105130275-105130961	intergenic	13.8698	crovir-transcript-2989	105127445	148.631	0.489525	3173	0.021328	0.021328	0.001229	0.022557	0.312866	0.166926	1.71203	0.384799	NonVenom	NA
scaffold-Z	105573130	105573779	intergenic|scaffold-Z:105573130-105573779	intergenic	9.512	crovir-transcript-2977	105590014	287.492	0.849639	16559.5	0.021728	0.021728	0.001229	0.022957	0.218367	0.087101	0.414285	0.107619	NonVenom	NA
scaffold-Z	105784061	105784892	intergenic|scaffold-Z:105784061-105784892	intergenic	21.8142	crovir-transcript-2976	105798653	123.641	0.537985	14176.5	0.012142	0.012142	0.001229	0.013371	0.291682	0.110565	1.0876	0.177667	NonVenom	NA
scaffold-Z	105803435	105804085	intergenic|scaffold-Z:105803435-105804085	intergenic	15.8844	crovir-transcript-2976	105798653	123.641	0.537985	5107	0.039843	0.039843	0.001229	0.041072	0.652403	0.2473	1.92493	0.31445	NonVenom	NA
scaffold-Z	107162135	107162914	genic|scaffold-Z:107162135-107162914	genic	11.3114	crovir-transcript-3049	107197697	140.135	0.878302	35172.5	0.011681	0.011681	0.001229	0.012911	0.146037	0.052004	0.255817	0.062436	NonVenom	NA
scaffold-Z	107162135	107162914	genic|scaffold-Z:107162135-107162914	genic	11.3114	crovir-transcript-3052	107224198	352.881	0.850489	61673.5	0.008782	0.008782	0.001229	0.010011	0.113237	0.053562	0.156944	0.04604	NonVenom	NA
scaffold-Z	107192727	107193009	genic|scaffold-Z:107192727-107193009	genic	4.69759	crovir-transcript-3049	107197697	140.135	0.878302	4829	0.075035	0.075035	0.001229	0.076264	0.358259	0.127576	0.579852	0.141521	NonVenom	NA
scaffold-Z	108250722	108251429	intergenic|scaffold-Z:108250722-108251429	intergenic	22.3467	crovir-transcript-3063	108264754	119.967	0.447197	13678.5	0.042412	0.042412	0.001229	0.043642	0.975246	0.498524	1.14935	0.448218	NonVenom	NA
scaffold-Z	110938814	110939004	intergenic|scaffold-Z:110938814-110939004	intergenic	3.96591	crovir-transcript-3128	110938048	752.183	0.809801	861	0.048953	0.048953	0.001229	0.050182	0.199019	0.097424	0.489537	0.105349	NonVenom	NA
scaffold-Z	110941965	110942432	intergenic|scaffold-Z:110941965-110942432	intergenic	6.61724	crovir-transcript-3128	110938048	752.183	0.809801	4150.5	0.027003	0.027003	0.001229	0.028232	0.186821	0.091452	0.816806	0.175779	NonVenom	NA
scaffold-Z	110959527	110960572	intergenic|scaffold-Z:110959527-110960572	intergenic	15.4311	crovir-transcript-3128	110938048	752.183	0.809801	22001.5	0.005886	0.005886	0.001229	0.007115	0.109795	0.053747	0.524891	0.112958	NonVenom	NA
scaffold-Z	111004366	111005275	intergenic|scaffold-Z:111004366-111005275	intergenic	22.4033	crovir-transcript-3128	110938048	752.183	0.809801	66772.5	0.012544	0.012544	0.001229	0.013773	0.30856	0.151046	0.290087	0.062427	NonVenom	NA
scaffold-Z	111532636	111532908	intergenic|scaffold-Z:111532636-111532908	intergenic	3.71414	crovir-transcript-3107	111534722	1125.83	0.971519	1950	0.081702	0.081702	0.001229	0.082931	0.308018	0.109557	0.458459	0.112514	NonVenom	NA
scaffold-Z	111533831	111534210	intergenic|scaffold-Z:111533831-111534210	intergenic	4.12232	crovir-transcript-3107	111534722	1125.83	0.971519	701.5	0.081702	0.081702	0.001229	0.082931	0.341869	0.121597	0.508842	0.124879	NonVenom	NA
scaffold-Z	113571767	113572297	intergenic|scaffold-Z:113571767-113572297	intergenic	9.84332	crovir-transcript-3157	113564247	289.628	0.84976	7785	0.011037	0.011037	0.001229	0.012267	0.120744	0.064275	0.826646	0.167057	NonVenom	NA
scaffold-Z	113571767	113572297	intergenic|scaffold-Z:113571767-113572297	intergenic	9.84332	crovir-transcript-3171	113588270	180.382	0.987733	16238	0.029631	0.029631	0.001229	0.03086	0.303768	0.090902	0.436091	0.085607	NonVenom	NA
scaffold-Z	113576997	113577224	intergenic|scaffold-Z:113576997-113577224	intergenic	4.63297	crovir-transcript-3171	113588270	180.382	0.987733	11159.5	0.040674	0.040674	0.001229	0.041904	0.194138	0.058095	0.284444	0.055838	NonVenom	NA
scaffold-Z	113916565	113917060	intergenic|scaffold-Z:113916565-113917060	intergenic	6.60287	crovir-transcript-3165	113943334	289.866	0.591607	26521.5	0.004372	0.004372	0.001229	0.005601	0.036985	0.058224	0.190901	0.109702	NonVenom	NA
scaffold-Z	113936586	113937053	intergenic|scaffold-Z:113936586-113937053	intergenic	1.97436	crovir-transcript-3165	113943334	289.866	0.591607	6514.5	0.018338	0.018338	0.001229	0.019567	0.038633	0.060819	0.193604	0.111255	NonVenom	NA
scaffold-Z	113955072	113955586	genic|scaffold-Z:113955072-113955586	genic	3.07782	crovir-transcript-3165	113943334	289.866	0.591607	11995	0.018938	0.018938	0.001229	0.020167	0.062071	0.097716	0.177461	0.101979	NonVenom	NA
scaffold-Z	113955072	113955586	genic|scaffold-Z:113955072-113955586	genic	3.07782	crovir-transcript-3175	113948582	484.82	0.388474	6747	0.027527	0.027527	0.001229	0.028756	0.088506	0.136603	0.292741	0.159991	NonVenom	NA
scaffold-Z	113973730	113974374	intergenic|scaffold-Z:113973730-113974374	intergenic	9.41844	crovir-transcript-3165	113943334	289.866	0.591607	30718	0.008746	0.008746	0.001229	0.009975	0.093952	0.147904	0.239638	0.137709	NonVenom	NA
scaffold-Z	113973730	113974374	intergenic|scaffold-Z:113973730-113974374	intergenic	9.41844	crovir-transcript-3175	113948582	484.82	0.388474	25470	0.014125	0.014125	0.001229	0.015354	0.144613	0.223202	0.282059	0.154154	NonVenom	NA
scaffold-Z	113973730	113974374	intergenic|scaffold-Z:113973730-113974374	intergenic	9.41844	crovir-transcript-3162	113982160	425.662	0.773608	8108	0.009673	0.009673	0.001229	0.010902	0.10268	0.078401	0.763482	0.250748	NonVenom	NA
scaffold-Z	113976659	113976792	intergenic|scaffold-Z:113976659-113976792	intergenic	1.8285	crovir-transcript-3162	113982160	425.662	0.773608	5434.5	0.072111	0.072111	0.001229	0.07334	0.134103	0.102393	0.209922	0.068944	NonVenom	NA
scaffold-Z	113977696	113978068	intergenic|scaffold-Z:113977696-113978068	intergenic	6.6726	crovir-transcript-3165	113943334	289.866	0.591607	34548	0.005996	0.005996	0.001229	0.007225	0.048208	0.075892	0.153277	0.088081	NonVenom	NA
scaffold-Z	113977696	113978068	intergenic|scaffold-Z:113977696-113978068	intergenic	6.6726	crovir-transcript-3175	113948582	484.82	0.388474	29300	0.00581	0.00581	0.001229	0.007039	0.046968	0.072493	0.176901	0.096681	NonVenom	NA
scaffold-Z	113977696	113978068	intergenic|scaffold-Z:113977696-113978068	intergenic	6.6726	crovir-transcript-3162	113982160	425.662	0.773608	4278	0.072111	0.072111	0.001229	0.07334	0.489372	0.373654	0.82364	0.270506	NonVenom	NA
scaffold-Z	113981254	113981565	intergenic|scaffold-Z:113981254-113981565	intergenic	3.01025	crovir-transcript-3162	113982160	425.662	0.773608	750.5	0.072111	0.072111	0.001229	0.07334	0.220773	0.168569	0.371573	0.122035	NonVenom	NA
scaffold-ma5	13847	14705	intergenic|scaffold-ma5:13847-14705	intergenic	37.7843	crovir-transcript-10108	543497	440.178	0.365823	529221	0	0	0.001229	0.001229	0.046444	0.10464	0.080792	0.058818	NonVenom	NA
scaffold-ma5	13847	14705	intergenic|scaffold-ma5:13847-14705	intergenic	37.7843	crovir-transcript-10113	575091	393.448	0.645108	560815	0	0	0.001229	0.001229	0.046444	0.165817	0.076817	0.0726	NonVenom	NA
scaffold-ma5	13847	14705	intergenic|scaffold-ma5:13847-14705	intergenic	37.7843	crovir-transcript-10114	593762	132.902	0.738264	579486	0	0	0.001229	0.001229	0.046444	0.061287	0.074659	0.053326	NonVenom	NA
scaffold-ma5	288040	288420	intergenic|scaffold-ma5:288040-288420	intergenic	3.69431	crovir-transcript-10109	280164	101.541	0.520496	8066	0.079308	0.079308	0.001229	0.080537	0.29753	0.277139	0.300826	0.213379	NonVenom	NA
scaffold-ma5	288040	288420	intergenic|scaffold-ma5:288040-288420	intergenic	3.69431	crovir-transcript-10102	303025	134.971	0.338526	14795	0.024508	0.024508	0.001229	0.025738	0.095082	0.098139	0.177472	0.116523	NonVenom	NA
scaffold-ma5	288801	288989	intergenic|scaffold-ma5:288801-288989	intergenic	2.27903	crovir-transcript-10109	280164	101.541	0.520496	8731	0.079308	0.079308	0.001229	0.080537	0.183547	0.170968	0.173222	0.122868	NonVenom	NA
scaffold-ma5	288801	288989	intergenic|scaffold-ma5:288801-288989	intergenic	2.27903	crovir-transcript-10102	303025	134.971	0.338526	14130	0.024508	0.024508	0.001229	0.025738	0.058657	0.060542	0.113952	0.074817	NonVenom	NA
scaffold-ma5	291493	291717	intergenic|scaffold-ma5:291493-291717	intergenic	1.79688	crovir-transcript-10102	303025	134.971	0.338526	11420	0.025927	0.025927	0.001229	0.027156	0.048796	0.050364	0.108128	0.070994	NonVenom	NA
scaffold-ma5	294350	294592	intergenic|scaffold-ma5:294350-294592	intergenic	1.93885	crovir-transcript-10102	303025	134.971	0.338526	8554	0.025927	0.025927	0.001229	0.027156	0.052651	0.054344	0.150015	0.098496	NonVenom	NA
scaffold-ma5	300817	301094	intergenic|scaffold-ma5:300817-301094	intergenic	2.41347	crovir-transcript-10109	280164	101.541	0.520496	20791.5	0.030912	0.030912	0.001229	0.032142	0.077573	0.072256	0.086235	0.061168	NonVenom	NA
scaffold-ma5	300817	301094	intergenic|scaffold-ma5:300817-301094	intergenic	2.41347	crovir-transcript-10102	303025	134.971	0.338526	2069.5	0.105975	0.105975	0.001229	0.107204	0.258733	0.26705	0.297909	0.195599	NonVenom	NA
scaffold-ma5	550918	551415	intergenic|scaffold-ma5:550918-551415	intergenic	5.15646	crovir-transcript-10108	543497	440.178	0.365823	7669.5	0.017569	0.017569	0.001229	0.018798	0.096932	0.218391	0.438709	0.319387	NonVenom	NA
scaffold-ma5	552444	552635	intergenic|scaffold-ma5:552444-552635	intergenic	1.3882	crovir-transcript-10108	543497	440.178	0.365823	9042.5	0.017569	0.017569	0.001229	0.018798	0.026096	0.058794	0.102344	0.074508	NonVenom	NA
scaffold-ma5	765491	766203	intergenic|scaffold-ma5:765491-766203	intergenic	7.79545	crovir-transcript-10114	593762	132.902	0.738264	172085	0.005388	0.005388	0.001229	0.006617	0.051582	0.068067	0.044296	0.031639	NonVenom	NA
scaffold-ma5	2926715	2927214	intergenic|scaffold-ma5:2926715-2927214	intergenic	14.2694	crovir-transcript-10130	2953147	132.507	0.637305	26182.5	0.005582	0.005582	0.001229	0.006811	0.097192	0.156948	0.417199	0.265093	NonVenom	NA
scaffold-ma5	2950877	2951083	genic|scaffold-ma5:2950877-2951083	genic	0.681441	crovir-transcript-10130	2953147	132.507	0.637305	2167	0.083706	0.083706	0.001229	0.084936	0.057879	0.093464	0.084114	0.053447	NonVenom	NA
scaffold-ma5	6953839	6954636	intergenic|scaffold-ma5:6953839-6954636	intergenic	10.1154	crovir-transcript-10185	6958416	271.493	0.537105	4178.5	0.035995	0.035995	0.001229	0.037225	0.376544	0.147749	1.24861	0.364564	NonVenom	NA
scaffold-ma5	6963497	6963715	intergenic|scaffold-ma5:6963497-6963715	intergenic	2.21009	crovir-transcript-10185	6958416	271.493	0.537105	5190	0.214153	0.214153	0.001229	0.215382	0.476014	0.18678	0.264097	0.07711	NonVenom	NA
scaffold-ma5	6963835	6964081	intergenic|scaffold-ma5:6963835-6964081	intergenic	6.21237	crovir-transcript-10185	6958416	271.493	0.537105	5542	0.214153	0.214153	0.001229	0.215382	1.33803	0.525021	0.701166	0.204724	NonVenom	NA
scaffold-ma5	9485167	9485816	intergenic|scaffold-ma5:9485167-9485816	intergenic	17.5674	crovir-transcript-10216	9410006	294.508	0.911338	75485.5	0.002181	0.002181	0.001229	0.00341	0.059908	0.070276	0.204448	0.067279	NonVenom	NA
scaffold-ma5	9485167	9485816	intergenic|scaffold-ma5:9485167-9485816	intergenic	17.5674	crovir-transcript-10217	9515881	800.57	0.986518	30389.5	0.011665	0.011665	0.001229	0.012894	0.226519	0.076248	0.451176	0.11737	NonVenom	NA
scaffold-ma5	12191079	12191209	intergenic|scaffold-ma5:12191079-12191209	intergenic	1.67699	crovir-transcript-10245	12190083	327.352	0.656829	1061	0.159725	0.159725	0.001229	0.160954	0.269918	0.215689	0.207001	0.118668	NonVenom	NA
scaffold-ma5	14225267	14225808	intergenic|scaffold-ma5:14225267-14225808	intergenic	7.01703	crovir-transcript-10265	14217117	220.593	0.133935	8420.5	0.009008	0.009008	0.001229	0.010238	0.071838	0.089469	0.55041	0.406193	NonVenom	NA
scaffold-ma5	14917460	14917731	intergenic|scaffold-ma5:14917460-14917731	intergenic	2.50826	crovir-transcript-10272	14919802	142.444	0.76626	2206.5	0.052225	0.052225	0.001229	0.053454	0.134076	0.108813	0.30961	0.125356	NonVenom	NA
scaffold-ma5	15411822	15412268	intergenic|scaffold-ma5:15411822-15412268	intergenic	140.4	crovir-transcript-10265	14217117	220.593	0.133935	1194928	0	0	0.001053	0.001053	0.147809	0.184085	0.147809	0.10908	NonVenom	NA
scaffold-ma5	15411822	15412268	intergenic|scaffold-ma5:15411822-15412268	intergenic	140.4	crovir-transcript-10272	14919802	142.444	0.76626	492243	0	0	0.001229	0.001229	0.172579	0.14006	0.319735	0.129456	NonVenom	NA
scaffold-ma5	15411822	15412268	intergenic|scaffold-ma5:15411822-15412268	intergenic	140.4	crovir-transcript-10283	15792400	275.56	0.560879	380355	0	0	0.001229	0.001229	0.172579	0.198504	0.400149	0.207761	NonVenom	NA
scaffold-ma5	15411822	15412268	intergenic|scaffold-ma5:15411822-15412268	intergenic	140.4	crovir-transcript-10288	15972097	129.655	0.935629	560052	0	0	0.001229	0.001229	0.172579	0.086774	0.285777	0.097618	NonVenom	NA
scaffold-ma5	15799382	15799791	intergenic|scaffold-ma5:15799382-15799791	intergenic	5.27206	crovir-transcript-10283	15792400	275.56	0.560879	7186.5	0.009753	0.009753	0.001229	0.010982	0.057899	0.066597	0.474656	0.246446	NonVenom	NA
scaffold-ma5	21061688	21062498	intergenic|scaffold-ma5:21061688-21062498	intergenic	20.0525	crovir-transcript-10302	20895896	238.289	0.674197	166197	0	0	0.001229	0.001229	0.024648	0.053842	0.117448	0.162721	NonVenom	NA
scaffold-ma5	21201691	21202586	intergenic|scaffold-ma5:21201691-21202586	intergenic	19.247	crovir-transcript-10302	20895896	238.289	0.674197	306242	0	0	0.001229	0.001229	0.023658	0.051679	0.066238	0.091771	NonVenom	NA
scaffold-ma5	22491896	22492659	intergenic|scaffold-ma5:22491896-22492659	intergenic	31.7035	crovir-transcript-10302	20895896	238.289	0.674197	1.59638e+06	0	0	0.000818	0.000818	0.025942	0.056667	0.025942	0.035942	NonVenom	NA
scaffold-ma5	22491896	22492659	intergenic|scaffold-ma5:22491896-22492659	intergenic	31.7035	crovir-transcript-10333	22637707	113.572	0.803304	145430	0	0	0.001229	0.001229	0.03897	0.052009	0.208554	0.190207	NonVenom	NA
scaffold-ma5	22630301	22630505	genic|scaffold-ma5:22630301-22630505	genic	0.586755	crovir-transcript-10333	22637707	113.572	0.803304	7304	0.06359	0.06359	0.001229	0.064819	0.038033	0.050758	0.052087	0.047505	NonVenom	NA
scaffold-ma5	25884824	25885669	intergenic|scaffold-ma5:25884824-25885669	intergenic	180.742	crovir-transcript-10302	20895896	238.289	0.674197	4.98935e+06	0	0	0.000304	0.000304	0.054876	0.11987	0.054876	0.076029	NonVenom	NA
scaffold-ma5	25884824	25885669	intergenic|scaffold-ma5:25884824-25885669	intergenic	180.742	crovir-transcript-10333	22637707	113.572	0.803304	3.24754e+06	0	0	0.000441	0.000441	0.079731	0.106408	0.079731	0.072717	NonVenom	NA
scaffold-ma5	25884824	25885669	intergenic|scaffold-ma5:25884824-25885669	intergenic	180.742	crovir-transcript-10396	29533291	103.958	0.885104	3.64804e+06	0	0	0.000399	0.000399	0.072059	0.081485	0.072059	0.037179	NonVenom	NA
scaffold-ma5	29520575	29521128	genic|scaffold-ma5:29520575-29521128	genic	6.53555	crovir-transcript-10396	29533291	103.958	0.885104	12439.5	0.00573	0.00573	0.001229	0.006959	0.045482	0.051432	0.365085	0.188369	NonVenom	NA
scaffold-ma5	33638660	33639217	intergenic|scaffold-ma5:33638660-33639217	intergenic	8.60746	crovir-transcript-10420	33650219	455.365	0.962895	11280.5	0.014465	0.014465	0.001229	0.015694	0.135085	0.075998	0.523525	0.21858	NonVenom	NA
scaffold-ma5	33652236	33652415	genic|scaffold-ma5:33652236-33652415	genic	1.09482	crovir-transcript-10420	33650219	455.365	0.962895	2106.5	0.108742	0.108742	0.001229	0.109971	0.120399	0.067736	0.135141	0.056423	NonVenom	NA
scaffold-ma5	35894511	35895203	intergenic|scaffold-ma5:35894511-35895203	intergenic	43.463	crovir-transcript-10448	36276040	219.736	0.651424	381183	0.003834	0.003834	0.001229	0.005063	0.220054	0.06533	0.123638	0.027662	NonVenom	NA
scaffold-ma5	36271480	36272089	intergenic|scaffold-ma5:36271480-36272089	intergenic	23.0833	crovir-transcript-10448	36276040	219.736	0.651424	4255.5	0.101433	0.101433	0.001229	0.102662	2.36978	0.703546	2.84931	0.637475	NonVenom	NA
scaffold-ma5	46827934	46828354	genic|scaffold-ma5:46827934-46828354	genic	6.20215	crovir-transcript-10543	46840089	122.448	0.801846	11945	0.023933	0.023933	0.001229	0.025162	0.156058	0.056158	0.358905	0.082361	NonVenom	NA
scaffold-ma5	46843575	46843964	intergenic|scaffold-ma5:46843575-46843964	intergenic	5.84146	crovir-transcript-10543	46840089	122.448	0.801846	3680.5	0.141279	0.141279	0.001229	0.142508	0.832456	0.299562	0.721047	0.165465	NonVenom	NA
scaffold-ma5	48567583	48568135	intergenic|scaffold-ma5:48567583-48568135	intergenic	18.8209	crovir-transcript-10618	51519504	214.108	0.642193	2951645	0.00298	0.00298	0.000479	0.00346	0.065115	0.050869	0.009022	0.004541	NonVenom	NA
scaffold-ma5	50342962	50343422	intergenic|scaffold-ma5:50342962-50343422	intergenic	6.12027	crovir-transcript-10600	50351434	113.663	0.687618	8242	0.031071	0.031071	0.001229	0.032301	0.197688	0.107765	0.4891	0.191485	NonVenom	NA
scaffold-ma5	50353014	50353389	genic|scaffold-ma5:50353014-50353389	genic	3.97505	crovir-transcript-10600	50351434	113.663	0.687618	1767.5	0.083734	0.083734	0.001229	0.084963	0.337732	0.184106	0.490664	0.192098	NonVenom	NA
scaffold-ma5	51514314	51514592	intergenic|scaffold-ma5:51514314-51514592	intergenic	1.39133	crovir-transcript-10618	51519504	214.108	0.642193	5051	0.253613	0.253613	0.001229	0.254842	0.354571	0.276997	0.170231	0.085683	NonVenom	NA
scaffold-ma5	53952768	53953299	genic|scaffold-ma5:53952768-53953299	genic	8.04964	crovir-transcript-10672	53952037	412.291	0.996903	996.5	0.065509	0.065509	0.001229	0.066738	0.537218	0.162235	0.993616	0.185727	NonVenom	NA
scaffold-ma5	56036647	56037168	genic|scaffold-ma5:56036647-56037168	genic	8.35739	crovir-transcript-10690	56011874	115.673	0.290035	25033.5	0.025091	0.025091	0.001229	0.026321	0.219971	0.189151	0.254076	0.162469	NonVenom	NA
scaffold-ma5	56608479	56609251	intergenic|scaffold-ma5:56608479-56609251	intergenic	26.5983	crovir-transcript-10709	56864794	303.856	0.910488	255929	0.010993	0.010993	0.001229	0.012222	0.32508	0.18368	0.107006	0.034039	NonVenom	NA
scaffold-ma5	58057447	58057858	intergenic|scaffold-ma5:58057447-58057858	intergenic	8.64241	crovir-transcript-10731	58036488	184.303	0.337129	21164.5	0.009706	0.009706	0.001229	0.010935	0.094506	0.071332	0.30406	0.124766	NonVenom	NA
scaffold-ma5	58058190	58058643	intergenic|scaffold-ma5:58058190-58058643	intergenic	16.0788	crovir-transcript-10731	58036488	184.303	0.337129	21928.5	0.009706	0.009706	0.001229	0.010935	0.175824	0.13271	0.548503	0.22507	NonVenom	NA
scaffold-ma5	58062710	58063223	intergenic|scaffold-ma5:58062710-58063223	intergenic	10.1136	crovir-transcript-10731	58036488	184.303	0.337129	26478.5	0.01437	0.01437	0.001229	0.0156	0.157767	0.119081	0.292817	0.120153	NonVenom	NA
scaffold-ma5	58063984	58064386	intergenic|scaffold-ma5:58063984-58064386	intergenic	7.66622	crovir-transcript-10731	58036488	184.303	0.337129	27697	0.01437	0.01437	0.001229	0.0156	0.119589	0.090265	0.213438	0.087581	NonVenom	NA
scaffold-ma5	61451156	61451925	intergenic|scaffold-ma5:61451156-61451925	intergenic	28.4263	crovir-transcript-10753	61476350	350.553	0.469059	24809.5	0.007273	0.007273	0.001229	0.008502	0.241674	0.15211	0.87098	0.258243	NonVenom	NA
scaffold-ma5	61451156	61451925	intergenic|scaffold-ma5:61451156-61451925	intergenic	28.4263	crovir-transcript-10755	61700485	164.018	0.86397	248944	0.003927	0.003927	0.001229	0.005156	0.146574	0.130136	0.117147	0.073388	NonVenom	NA
scaffold-ma5	61458821	61459435	intergenic|scaffold-ma5:61458821-61459435	intergenic	6.2508	crovir-transcript-10753	61476350	350.553	0.469059	17222	0.013192	0.013192	0.001229	0.014421	0.090143	0.056736	0.263113	0.078012	NonVenom	NA
scaffold-ma5	61478989	61479343	genic|scaffold-ma5:61478989-61479343	genic	3.64955	crovir-transcript-10753	61476350	350.553	0.469059	2816	0.109912	0.109912	0.001229	0.111141	0.405615	0.255294	0.450486	0.133568	NonVenom	NA
scaffold-ma5	61701563	61701897	intergenic|scaffold-ma5:61701563-61701897	intergenic	1.96174	crovir-transcript-10755	61700485	164.018	0.86397	1245	0.05717	0.05717	0.001229	0.058399	0.114564	0.101716	0.242149	0.151698	NonVenom	NA
scaffold-ma5	61906388	61906670	intergenic|scaffold-ma5:61906388-61906670	intergenic	1.1617	crovir-transcript-10759	61903833	153.341	0.208538	2696	0.085204	0.085204	0.001229	0.086433	0.10041	0.101189	0.143396	0.089411	NonVenom	NA
scaffold-ma5	61928442	61929244	intergenic|scaffold-ma5:61928442-61929244	intergenic	17.5453	crovir-transcript-10755	61700485	164.018	0.86397	228358	0.003364	0.003364	0.001229	0.004593	0.080594	0.071556	0.077944	0.048829	NonVenom	NA
scaffold-ma5	61928442	61929244	intergenic|scaffold-ma5:61928442-61929244	intergenic	17.5453	crovir-transcript-10759	61903833	153.341	0.208538	25010	0.01251	0.01251	0.001229	0.013739	0.241057	0.242925	0.533835	0.332859	NonVenom	NA
scaffold-ma5	61945857	61946472	intergenic|scaffold-ma5:61945857-61946472	intergenic	9.86273	crovir-transcript-10759	61903833	153.341	0.208538	42331.5	0.004423	0.004423	0.001229	0.005652	0.055748	0.05618	0.189851	0.118377	NonVenom	NA
scaffold-ma5	67339241	67339467	intergenic|scaffold-ma5:67339241-67339467	intergenic	2.82767	crovir-transcript-10814	67338280	554.074	0.495051	1074	0.093371	0.093371	0.001229	0.0946	0.267499	0.200415	0.349037	0.15586	NonVenom	NA
scaffold-ma5	67339923	67340130	intergenic|scaffold-ma5:67339923-67340130	intergenic	2.96569	crovir-transcript-10814	67338280	554.074	0.495051	1746.5	0.044152	0.044152	0.001229	0.045382	0.134587	0.100835	0.366073	0.163468	NonVenom	NA
scaffold-ma5	70030709	70031120	intergenic|scaffold-ma5:70030709-70031120	intergenic	8.43327	crovir-transcript-10849	69980698	951.172	0.978442	50216.5	0.008031	0.008031	0.001229	0.00926	0.078095	0.051922	0.139918	0.036108	NonVenom	NA
scaffold-ma5	70083013	70083359	intergenic|scaffold-ma5:70083013-70083359	intergenic	67.7194	crovir-transcript-10849	69980698	951.172	0.978442	102488	0	0	0.001229	0.001229	0.08324	0.055343	0.604012	0.155874	NonVenom	NA
scaffold-ma5	70083013	70083359	intergenic|scaffold-ma5:70083013-70083359	intergenic	67.7194	crovir-transcript-10860	71018296	103.249	0.480081	935110	0	0	0.001229	0.001229	0.08324	0.128403	0.088244	0.090801	NonVenom	NA
scaffold-ma5	70178219	70179022	intergenic|scaffold-ma5:70178219-70179022	intergenic	31.526	crovir-transcript-10849	69980698	951.172	0.978442	197922	0.004686	0.004686	0.001229	0.005916	0.186495	0.123992	0.158612	0.040932	NonVenom	NA
scaffold-ma5	70178219	70179022	intergenic|scaffold-ma5:70178219-70179022	intergenic	31.526	crovir-transcript-10860	71018296	103.249	0.480081	839676	0	0	0.001229	0.001229	0.038752	0.059777	0.045114	0.046422	NonVenom	NA
scaffold-ma5	76004541	76005163	genic|scaffold-ma5:76004541-76005163	genic	9.02482	crovir-transcript-10895	76096351	162.509	0.667578	91499	0.005277	0.005277	0.001229	0.006506	0.058718	0.057407	0.088843	0.041039	NonVenom	NA
scaffold-ma5	76086761	76087432	intergenic|scaffold-ma5:76086761-76087432	intergenic	9.96766	crovir-transcript-10895	76096351	162.509	0.667578	9254.5	0.020869	0.020869	0.001229	0.022098	0.220266	0.215348	0.72019	0.332678	NonVenom	NA
scaffold-ma5	76093887	76094167	intergenic|scaffold-ma5:76093887-76094167	intergenic	1.57526	crovir-transcript-10895	76096351	162.509	0.667578	2324	0.037839	0.037839	0.001229	0.039068	0.061543	0.060169	0.194444	0.08982	NonVenom	NA
scaffold-ma5	83070201	83071993	intergenic|scaffold-ma5:83070201-83071993	intergenic	33.9781	crovir-transcript-10937	81677957	211.9	0.778709	1393140	0	0	0.000921	0.000921	0.0313	0.05179	0.0313	0.023036	NonVenom	NA
scaffold-ma5	83070201	83071993	intergenic|scaffold-ma5:83070201-83071993	intergenic	33.9781	crovir-transcript-10951	83348448	2025.95	0.390417	277351	0	0	0.001229	0.001229	0.041766	0.11943	0.127463	0.178023	NonVenom	NA
scaffold-ma5	83070201	83071993	intergenic|scaffold-ma5:83070201-83071993	intergenic	33.9781	crovir-transcript-10980	85679184	118.428	0.076243	2608087	0	0	0.000534	0.000534	0.018139	0.060028	0.018139	0.022686	NonVenom	NA
scaffold-ma5	83070201	83071993	intergenic|scaffold-ma5:83070201-83071993	intergenic	33.9781	crovir-transcript-10977	85684051	375.35	0.503188	2612954	0	0	0.000533	0.000533	0.01811	0.056987	0.01811	0.023462	NonVenom	NA
scaffold-ma5	85665265	85665455	intergenic|scaffold-ma5:85665265-85665455	intergenic	2.7895	crovir-transcript-10979	85668095	183.501	0.574361	2735	0.112313	0.112313	0.001229	0.113543	0.316728	0.402098	0.344325	0.343942	NonVenom	NA
scaffold-ma5	85888361	85889056	intergenic|scaffold-ma5:85888361-85889056	intergenic	15.333	crovir-transcript-10979	85668095	183.501	0.574361	220614	0.005965	0.005965	0.001229	0.007194	0.110304	0.140035	0.070192	0.070114	NonVenom	NA
scaffold-ma5	85888361	85889056	intergenic|scaffold-ma5:85888361-85889056	intergenic	15.333	crovir-transcript-10980	85679184	118.428	0.076243	209524	0	0	0.001229	0.001229	0.018847	0.062371	0.073413	0.091813	NonVenom	NA
scaffold-ma5	85888361	85889056	intergenic|scaffold-ma5:85888361-85889056	intergenic	15.333	crovir-transcript-10977	85684051	375.35	0.503188	204658	0	0	0.001229	0.001229	0.018847	0.059308	0.074929	0.097075	NonVenom	NA
scaffold-ma5	85888361	85889056	intergenic|scaffold-ma5:85888361-85889056	intergenic	15.333	crovir-transcript-10987	85887569	105.486	0.84812	1139.5	0.131528	0.131528	0.001229	0.132757	2.03557	0.623474	1.89264	0.55537	NonVenom	NA
scaffold-ma5	86037181	86037861	intergenic|scaffold-ma5:86037181-86037861	intergenic	31.3896	crovir-transcript-10975	85441213	102.543	0.774215	596308	0	0	0.001229	0.001229	0.038584	0.05873	0.060499	0.062104	NonVenom	NA
scaffold-ma5	86037181	86037861	intergenic|scaffold-ma5:86037181-86037861	intergenic	31.3896	crovir-transcript-10980	85679184	118.428	0.076243	358337	0	0	0.001229	0.001229	0.038584	0.127686	0.094226	0.117844	NonVenom	NA
scaffold-ma5	86037181	86037861	intergenic|scaffold-ma5:86037181-86037861	intergenic	31.3896	crovir-transcript-10977	85684051	375.35	0.503188	353470	0	0	0.001229	0.001229	0.038584	0.121415	0.095354	0.123536	NonVenom	NA
scaffold-ma5	86037181	86037861	intergenic|scaffold-ma5:86037181-86037861	intergenic	31.3896	crovir-transcript-11012	86977679	118.539	0.505799	940158	0	0	0.001229	0.001229	0.038584	0.105483	0.040712	0.066828	NonVenom	NA
scaffold-ma5	86945342	86945439	intergenic|scaffold-ma5:86945342-86945439	intergenic	4.86169	crovir-transcript-11012	86977679	118.539	0.505799	32288.5	0.006903	0.006903	0.001229	0.008132	0.039537	0.108088	0.118447	0.194429	NonVenom	NA
scaffold-ma5	86976746	86976936	genic|scaffold-ma5:86976746-86976936	genic	1.03486	crovir-transcript-11012	86977679	118.539	0.505799	838	0.075906	0.075906	0.001229	0.077135	0.079824	0.218228	0.127739	0.209681	NonVenom	NA
scaffold-mi6	29040	29342	genic|scaffold-mi6:29040-29342	genic	1.52375	crovir-transcript-11419	41106	198.949	0.624036	11915	0.027487	0.027487	0.001229	0.028716	0.043756	0.073081	0.088369	0.041334	NonVenom	NA
scaffold-mi6	48859	49044	genic|scaffold-mi6:48859-49044	genic	0.680109	crovir-transcript-11419	41106	198.949	0.624036	7845.5	0.06952	0.06952	0.001229	0.070749	0.048117	0.080365	0.056732	0.026536	NonVenom	NA
scaffold-mi6	317616	318145	intergenic|scaffold-mi6:317616-318145	intergenic	10.3799	crovir-transcript-11429	420275	591.625	0.50838	102394	0.0037	0.0037	0.001229	0.004929	0.051166	0.051955	0.092655	0.041909	NonVenom	NA
scaffold-mi6	944332	945654	intergenic|scaffold-mi6:944332-945654	intergenic	18.6714	crovir-transcript-11429	420275	591.625	0.50838	524718	0.00245	0.00245	0.001229	0.003679	0.068693	0.069752	0.040222	0.018193	NonVenom	NA
scaffold-mi6	1105616	1106203	intergenic|scaffold-mi6:1105616-1106203	intergenic	5.97331	crovir-transcript-11436	1124206	166.633	0.959981	18296.5	0.036733	0.036733	0.001229	0.037962	0.226759	0.074403	0.238537	0.050993	NonVenom	NA
scaffold-mi6	1153093	1153605	genic|scaffold-mi6:1153093-1153605	genic	10.7459	crovir-transcript-11436	1124206	166.633	0.959981	29143	0.018684	0.018684	0.001229	0.019913	0.213986	0.070212	0.286225	0.061187	NonVenom	NA
scaffold-mi6	1153807	1154103	genic|scaffold-mi6:1153807-1154103	genic	8.69403	crovir-transcript-11436	1124206	166.633	0.959981	29749	0.018684	0.018684	0.001229	0.019913	0.173126	0.056805	0.227462	0.048625	NonVenom	NA
scaffold-mi6	3509615	3510818	genic|scaffold-mi6:3509615-3510818	genic	14.9772	crovir-transcript-11466	3521497	183.144	0.693022	11280.5	0.017107	0.017107	0.001229	0.018336	0.274624	0.057411	0.910946	0.15825	NonVenom	NA
scaffold-mi6	3515818	3516187	genic|scaffold-mi6:3515818-3516187	genic	8.34235	crovir-transcript-11466	3521497	183.144	0.693022	5494.5	0.133607	0.133607	0.001229	0.134836	1.12485	0.235154	0.948645	0.164799	NonVenom	NA
scaffold-mi6	3519037	3519330	genic|scaffold-mi6:3519037-3519330	genic	5.82031	crovir-transcript-11466	3521497	183.144	0.693022	2313.5	0.133607	0.133607	0.001229	0.134836	0.784788	0.164062	0.718436	0.124807	NonVenom	NA
scaffold-mi6	3522972	3523194	intergenic|scaffold-mi6:3522972-3523194	intergenic	5.02491	crovir-transcript-11466	3521497	183.144	0.693022	1586	0.133607	0.133607	0.001229	0.134836	0.67754	0.141642	0.620255	0.107751	NonVenom	NA
scaffold-mi6	3524961	3525142	intergenic|scaffold-mi6:3524961-3525142	intergenic	4.85886	crovir-transcript-11466	3521497	183.144	0.693022	3554.5	0.069511	0.069511	0.001229	0.07074	0.343715	0.071855	0.599758	0.10419	NonVenom	NA
scaffold-mi6	3526035	3526236	intergenic|scaffold-mi6:3526035-3526236	intergenic	6.32855	crovir-transcript-11466	3521497	183.144	0.693022	4638.5	0.069511	0.069511	0.001229	0.07074	0.447681	0.093589	0.781171	0.135705	NonVenom	NA
scaffold-mi6	3812158	3812408	genic|scaffold-mi6:3812158-3812408	genic	3.513	crovir-transcript-11467	3811145	283.886	0.997146	1138	0.123591	0.123591	0.001229	0.12482	0.438493	0.084309	0.433631	0.072202	NonVenom	NA
scaffold-mi6	3812158	3812408	genic|scaffold-mi6:3812158-3812408	genic	3.513	crovir-transcript-11474	3816963	114.457	0.715917	4680	0.047666	0.047666	0.001229	0.048895	0.171769	0.074962	0.433631	0.084828	NonVenom	NA
scaffold-mi6	4581903	4582147	genic|scaffold-mi6:4581903-4582147	genic	1.23995	crovir-transcript-11478	4580153	1050.26	0.619056	1872	0.067681	0.067681	0.001229	0.06891	0.085445	0.074271	0.153055	0.108342	NonVenom	NA
scaffold-mi6	4585131	4585447	genic|scaffold-mi6:4585131-4585447	genic	1.63148	crovir-transcript-11478	4580153	1050.26	0.619056	5136	0.067681	0.067681	0.001229	0.06891	0.112426	0.097724	0.196737	0.139264	NonVenom	NA
scaffold-mi6	4594566	4595025	genic|scaffold-mi6:4594566-4595025	genic	3.51124	crovir-transcript-11478	4580153	1050.26	0.619056	14642.5	0.029517	0.029517	0.001229	0.030746	0.107957	0.093839	0.170205	0.120482	NonVenom	NA
scaffold-mi6	4802545	4803089	intergenic|scaffold-mi6:4802545-4803089	intergenic	8.61805	crovir-transcript-11486	4788371	233.083	0.436722	14446	0.008949	0.008949	0.001229	0.010178	0.087716	0.113763	0.422692	0.301766	NonVenom	NA
scaffold-mi6	5996559	5997402	genic|scaffold-mi6:5996559-5997402	genic	13.2021	crovir-transcript-11502	5994122	160.694	0.967146	2858.5	0.017324	0.017324	0.001229	0.018553	0.244938	0.182605	1.62961	0.39954	NonVenom	NA
scaffold-mi6	5996559	5997402	genic|scaffold-mi6:5996559-5997402	genic	13.2021	crovir-transcript-11504	6123283	198.294	0.699338	126302	0.004588	0.004588	0.001229	0.005817	0.076793	0.067709	0.098182	0.070897	NonVenom	NA
scaffold-mi6	5996559	5997402	genic|scaffold-mi6:5996559-5997402	genic	13.2021	crovir-transcript-11513	6664018	346.209	0.570717	667038	0.002212	0.002212	0.001229	0.003441	0.045426	0.054703	0.023081	0.026038	NonVenom	NA
scaffold-mi6	6661577	6661708	intergenic|scaffold-mi6:6661577-6661708	intergenic	1.90316	crovir-transcript-11513	6664018	346.209	0.570717	2375.5	0.059023	0.059023	0.001229	0.060252	0.11467	0.138088	0.234919	0.265015	NonVenom	NA
scaffold-mi6	9040814	9041367	genic|scaffold-mi6:9040814-9041367	genic	8.95247	crovir-transcript-11524	8542479	115.921	0.462379	498612	0.003944	0.003944	0.001229	0.005173	0.046312	0.058822	0.020161	0.022298	NonVenom	NA
scaffold-mi6	9041919	9042218	genic|scaffold-mi6:9041919-9042218	genic	7.7391	crovir-transcript-11524	8542479	115.921	0.462379	499590	0.003944	0.003944	0.001229	0.005173	0.040035	0.050849	0.017399	0.019243	NonVenom	NA
scaffold-mi6	9461298	9461562	intergenic|scaffold-mi6:9461298-9461562	intergenic	4.13471	crovir-transcript-11560	9545733	222.996	0.551345	84303	0.006484	0.006484	0.001229	0.007713	0.031892	0.055252	0.04371	0.048642	NonVenom	NA
scaffold-mi6	12884621	12885012	intergenic|scaffold-mi6:12884621-12885012	intergenic	4.48391	crovir-transcript-11599	12924349	132.778	0.731341	39532.5	0.01345	0.01345	0.001229	0.01468	0.065822	0.097944	0.091605	0.094779	NonVenom	NA
scaffold-mi6	12886723	12887182	intergenic|scaffold-mi6:12886723-12887182	intergenic	4.90434	crovir-transcript-11599	12924349	132.778	0.731341	37396.5	0.02314	0.02314	0.001229	0.024369	0.119515	0.17784	0.105155	0.108798	NonVenom	NA
scaffold-mi6	12920964	12921248	genic|scaffold-mi6:12920964-12921248	genic	0.62129	crovir-transcript-11599	12924349	132.778	0.731341	3243	0.078144	0.078144	0.001229	0.079373	0.049314	0.07338	0.07669	0.079346	NonVenom	NA
scaffold-mi10	59882	60185	intergenic|scaffold-mi10:59882-60185	intergenic	6.98636	crovir-transcript-12362	65598	388.627	0.523927	5564.5	0.029444	0.029444	0.001229	0.030673	0.21429	0.176521	0.785749	0.279609	NonVenom	NA
scaffold-mi10	61683	61806	intergenic|scaffold-mi10:61683-61806	intergenic	3.67007	crovir-transcript-12362	65598	388.627	0.523927	3853.5	0.029444	0.029444	0.001229	0.030673	0.112571	0.09273	0.453019	0.161207	NonVenom	NA
scaffold-mi10	774683	774942	intergenic|scaffold-mi10:774683-774942	intergenic	1.24185	crovir-transcript-12378	777682	2301.24	0.605028	2869.5	0.139471	0.139471	0.001229	0.1407	0.174728	0.1402	0.153289	0.06448	NonVenom	NA
scaffold-mi10	774683	774942	intergenic|scaffold-mi10:774683-774942	intergenic	1.24185	crovir-transcript-12376	778957	1792.96	0.589664	4144.5	0.139471	0.139471	0.001229	0.1407	0.174728	0.14018	0.153289	0.063616	NonVenom	NA
scaffold-mi10	1084029	1084838	intergenic|scaffold-mi10:1084029-1084838	intergenic	23.0093	crovir-transcript-12384	1146035	173.8	0.87393	61601.5	0.006991	0.006991	0.001229	0.00822	0.189145	0.125151	0.319576	0.092805	NonVenom	NA
scaffold-mi10	1084029	1084838	intergenic|scaffold-mi10:1084029-1084838	intergenic	23.0093	crovir-transcript-12412	1237793	236.954	0.60187	153360	0.004995	0.004995	0.001229	0.006224	0.143219	0.132592	0.144529	0.068306	NonVenom	NA
scaffold-mi10	1084029	1084838	intergenic|scaffold-mi10:1084029-1084838	intergenic	23.0093	crovir-transcript-12468	2932832	133.46	0.838161	1.8484e+06	0.005075	0.005075	0.00072	0.005796	0.133353	0.060996	0.016573	0.004558	NonVenom	NA
scaffold-mi10	1150218	1150587	genic|scaffold-mi10:1150218-1150587	genic	5.59245	crovir-transcript-12384	1146035	173.8	0.87393	4367.5	0.022505	0.022505	0.001229	0.023735	0.132735	0.087827	0.69031	0.200467	NonVenom	NA
scaffold-mi10	1659168	1659836	intergenic|scaffold-mi10:1659168-1659836	intergenic	16.7252	crovir-transcript-12416	1662369	615.173	0.775551	2867	0.022557	0.022557	0.001229	0.023786	0.397829	0.178501	2.06449	0.414158	NonVenom	NA
scaffold-mi10	1673634	1673954	genic|scaffold-mi10:1673634-1673954	genic	7.27426	crovir-transcript-12416	1662369	615.173	0.775551	11425	0.027958	0.027958	0.001229	0.029187	0.212317	0.095264	0.437565	0.08778	NonVenom	NA
scaffold-mi10	1673634	1673954	genic|scaffold-mi10:1673634-1673954	genic	7.27426	crovir-transcript-12417	1668704	427.035	0.548187	5090	0.073673	0.073673	0.001229	0.074902	0.544855	0.27471	0.88408	0.188822	NonVenom	NA
scaffold-mi10	1678852	1679296	intergenic|scaffold-mi10:1678852-1679296	intergenic	6.70763	crovir-transcript-12416	1662369	615.173	0.775551	16705	0.02316	0.02316	0.001229	0.024389	0.163595	0.073403	0.289929	0.058163	NonVenom	NA
scaffold-mi10	1725486	1725653	intergenic|scaffold-mi10:1725486-1725653	intergenic	2.73274	crovir-transcript-12427	1730623	557.702	0.721747	5053.5	0.106039	0.106039	0.001229	0.107268	0.293136	0.101475	0.334211	0.079389	NonVenom	NA
scaffold-mi10	1742744	1743108	intergenic|scaffold-mi10:1742744-1743108	intergenic	5.82622	crovir-transcript-12427	1730623	557.702	0.721747	12303	0.029996	0.029996	0.001229	0.031226	0.181927	0.062978	0.328601	0.078057	NonVenom	NA
scaffold-mi10	2287637	2288126	intergenic|scaffold-mi10:2287637-2288126	intergenic	3.63601	crovir-transcript-12436	2298480	106.036	0.405083	10598.5	0.01647	0.01647	0.001229	0.017699	0.064353	0.050918	0.233479	0.132195	NonVenom	NA
scaffold-mi10	2739018	2739609	genic|scaffold-mi10:2739018-2739609	genic	6.60462	crovir-transcript-12471	2712340	139.238	0.662112	26973.5	0.013129	0.013129	0.001229	0.014359	0.094833	0.050555	0.188166	0.062158	NonVenom	NA
scaffold-mi10	2770786	2770898	genic|scaffold-mi10:2770786-2770898	genic	2.621	crovir-transcript-12466	2773631	424.493	0.546001	2789	0.072901	0.072901	0.001229	0.07413	0.194296	0.100423	0.323526	0.087475	NonVenom	NA
scaffold-mi10	2772178	2772510	intergenic|scaffold-mi10:2772178-2772510	intergenic	1.88458	crovir-transcript-12466	2773631	424.493	0.546001	1287	0.072901	0.072901	0.001229	0.07413	0.139704	0.072207	0.232625	0.062897	NonVenom	NA
scaffold-mi10	2780791	2781239	genic|scaffold-mi10:2780791-2781239	genic	7.23914	crovir-transcript-12466	2773631	424.493	0.546001	7384	0.018234	0.018234	0.001229	0.019463	0.140896	0.072823	0.636566	0.172115	NonVenom	NA
scaffold-mi10	2844380	2844633	intergenic|scaffold-mi10:2844380-2844633	intergenic	1.74151	crovir-transcript-12469	2842895	256.402	0.671525	1611.5	0.123455	0.123455	0.001229	0.124684	0.217138	0.098882	0.214965	0.040586	NonVenom	NA
scaffold-mi10	2849390	2850534	intergenic|scaffold-mi10:2849390-2850534	intergenic	13.8428	crovir-transcript-12471	2712340	139.238	0.662112	137622	0.008691	0.008691	0.001229	0.009921	0.137329	0.07321	0.09554	0.03156	NonVenom	NA
scaffold-mi10	2849390	2850534	intergenic|scaffold-mi10:2849390-2850534	intergenic	13.8428	crovir-transcript-12469	2842895	256.402	0.671525	7067	0.016636	0.016636	0.001229	0.017865	0.247306	0.11262	1.26461	0.238761	NonVenom	NA
scaffold-mi10	2849390	2850534	intergenic|scaffold-mi10:2849390-2850534	intergenic	13.8428	crovir-transcript-12576	4377069	280.36	0.514301	1527107	0.005164	0.005164	0.00085	0.006015	0.083258	0.063234	0.011773	0.005122	NonVenom	NA
scaffold-mi10	2851643	2852085	intergenic|scaffold-mi10:2851643-2852085	intergenic	12.4894	crovir-transcript-12493	3084909	108.416	0.730613	233045	0.007941	0.007941	0.001229	0.00917	0.114532	0.062801	0.054512	0.020098	NonVenom	NA
scaffold-mi10	2999394	2999818	intergenic|scaffold-mi10:2999394-2999818	intergenic	7.71546	crovir-transcript-12491	2988654	100.873	0.561578	10952	0.010283	0.010283	0.001229	0.011512	0.088821	0.056905	0.481493	0.143742	NonVenom	NA
scaffold-mi10	2999394	2999818	intergenic|scaffold-mi10:2999394-2999818	intergenic	7.71546	crovir-transcript-12489	2995074	202.817	0.548066	4532	0.114043	0.114043	0.001229	0.115272	0.889378	0.42149	0.952366	0.246446	NonVenom	NA
scaffold-mi10	3269470	3269946	genic|scaffold-mi10:3269470-3269946	genic	2.85226	crovir-transcript-12516	3271242	385.598	0.649177	1534	0.085946	0.085946	0.001229	0.087176	0.248648	0.109007	0.352072	0.095385	NonVenom	NA
scaffold-mi10	3284883	3285449	intergenic|scaffold-mi10:3284883-3285449	intergenic	12.4679	crovir-transcript-12516	3271242	385.598	0.649177	13924	0.029243	0.029243	0.001229	0.030472	0.379926	0.166558	0.631411	0.171065	NonVenom	NA
scaffold-mi10	3286041	3286206	intergenic|scaffold-mi10:3286041-3286206	intergenic	4.37892	crovir-transcript-12516	3271242	385.598	0.649177	14881.5	0.029243	0.029243	0.001229	0.030472	0.133436	0.058498	0.209296	0.056704	NonVenom	NA
scaffold-mi10	3286551	3286731	intergenic|scaffold-mi10:3286551-3286731	intergenic	4.50864	crovir-transcript-12516	3271242	385.598	0.649177	15399	0.029243	0.029243	0.001229	0.030472	0.137389	0.060231	0.209182	0.056673	NonVenom	NA
scaffold-mi10	3412117	3412389	intergenic|scaffold-mi10:3412117-3412389	intergenic	2.79054	crovir-transcript-12521	3409199	110.753	0.513573	3054	0.093839	0.093839	0.001229	0.095068	0.265293	0.05518	0.344454	0.068927	NonVenom	NA
scaffold-mi10	3483138	3483541	intergenic|scaffold-mi10:3483138-3483541	intergenic	6.12338	crovir-transcript-12523	3481369	319.878	0.669035	1970.5	0.028241	0.028241	0.001229	0.02947	0.180454	0.109659	0.755846	0.239584	NonVenom	NA
scaffold-mi10	3741935	3742441	genic|scaffold-mi10:3741935-3742441	genic	6.90679	crovir-transcript-12534	3743015	261.532	0.78551	827	0.078248	0.078248	0.001229	0.079477	0.548935	0.298717	0.852547	0.285745	NonVenom	NA
scaffold-mi10	3751800	3751997	genic|scaffold-mi10:3751800-3751997	genic	2.13801	crovir-transcript-12535	3755785	184.671	0.538592	3886.5	0.068331	0.068331	0.001229	0.06956	0.148719	0.071139	0.263907	0.076884	NonVenom	NA
scaffold-mi10	3757669	3757829	genic|scaffold-mi10:3757669-3757829	genic	3.19	crovir-transcript-12535	3755785	184.671	0.538592	1964	0.068331	0.068331	0.001229	0.06956	0.221895	0.106142	0.39376	0.114714	NonVenom	NA
scaffold-mi10	3760686	3761179	genic|scaffold-mi10:3760686-3761179	genic	4.11165	crovir-transcript-12535	3755785	184.671	0.538592	5147.5	0.054122	0.054122	0.001229	0.055351	0.227583	0.108863	0.494852	0.144165	NonVenom	NA
scaffold-mi10	3761669	3761981	genic|scaffold-mi10:3761669-3761981	genic	3.79673	crovir-transcript-12535	3755785	184.671	0.538592	6040	0.054122	0.054122	0.001229	0.055351	0.210152	0.100525	0.397619	0.115838	NonVenom	NA
scaffold-mi10	4310587	4311094	intergenic|scaffold-mi10:4310587-4311094	intergenic	7.88457	crovir-transcript-12559	4335892	207.662	0.639825	25051.5	0.009475	0.009475	0.001229	0.010704	0.084395	0.055647	0.239552	0.091624	NonVenom	NA
scaffold-mi10	4316598	4317016	genic|scaffold-mi10:4316598-4317016	genic	7.34464	crovir-transcript-12559	4335892	207.662	0.639825	19085	0.015485	0.015485	0.001229	0.016714	0.122757	0.080942	0.282729	0.108138	NonVenom	NA
scaffold-mi10	4406723	4406964	genic|scaffold-mi10:4406723-4406964	genic	1.96284	crovir-transcript-12564	4402202	679.733	0.21282	4641.5	0.053602	0.053602	0.001229	0.054831	0.107624	0.071118	0.242286	0.094375	NonVenom	NA
scaffold-mi10	4408460	4408614	genic|scaffold-mi10:4408460-4408614	genic	1.93773	crovir-transcript-12564	4402202	679.733	0.21282	6335	0.053602	0.053602	0.001229	0.054831	0.106247	0.070208	0.194687	0.075834	NonVenom	NA
scaffold-mi10	4598239	4598423	genic|scaffold-mi10:4598239-4598423	genic	1.06594	crovir-transcript-12591	4600270	2304.35	0.725815	1939	0.090564	0.090564	0.001229	0.091793	0.097846	0.05432	0.131576	0.046705	NonVenom	NA
scaffold-mi10	4925424	4925799	intergenic|scaffold-mi10:4925424-4925799	intergenic	4.1813	crovir-transcript-12644	4922382	104.718	0.734013	3229.5	0.024645	0.024645	0.001229	0.025875	0.108189	0.063388	0.516123	0.112584	NonVenom	NA
scaffold-mi10	4926940	4927861	intergenic|scaffold-mi10:4926940-4927861	intergenic	3.81689	crovir-transcript-12644	4922382	104.718	0.734013	5018.5	0.024645	0.024645	0.001229	0.025875	0.09876	0.057864	0.469631	0.102442	NonVenom	NA
scaffold-mi10	4935731	4936182	genic|scaffold-mi10:4935731-4936182	genic	9.0307	crovir-transcript-12641	4945935	167.846	0.906115	9978.5	0.019895	0.019895	0.001229	0.021124	0.190766	0.071427	0.611109	0.09487	NonVenom	NA
scaffold-mi10	4941266	4941763	genic|scaffold-mi10:4941266-4941763	genic	6.53138	crovir-transcript-12641	4945935	167.846	0.906115	4420.5	0.050615	0.050615	0.001229	0.051845	0.338617	0.126786	0.806208	0.125158	NonVenom	NA
scaffold-mi10	4944324	4944540	genic|scaffold-mi10:4944324-4944540	genic	6.9084	crovir-transcript-12641	4945935	167.846	0.906115	1503	0.050615	0.050615	0.001229	0.051845	0.358163	0.134105	0.852745	0.132383	NonVenom	NA
scaffold-mi10	4973692	4973889	intergenic|scaffold-mi10:4973692-4973889	intergenic	1.22331	crovir-transcript-12608	4977243	442.858	0.631505	3452.5	0.098988	0.098988	0.001229	0.100217	0.122597	0.067729	0.151	0.040778	NonVenom	NA
scaffold-mi10	4999577	4999919	genic|scaffold-mi10:4999577-4999919	genic	2.52269	crovir-transcript-12621	4997223	154.854	0.752475	2525	0.097173	0.097173	0.001229	0.098402	0.248238	0.147467	0.31139	0.095153	NonVenom	NA
scaffold-mi10	5083780	5084369	intergenic|scaffold-mi10:5083780-5084369	intergenic	10.3309	crovir-transcript-12608	4977243	442.858	0.631505	106832	0.009025	0.009025	0.001229	0.010254	0.105935	0.058525	0.088877	0.024001	NonVenom	NA
scaffold-mi10	5129188	5129584	intergenic|scaffold-mi10:5129188-5129584	intergenic	8.63855	crovir-transcript-12634	5127895	363.526	0.816846	1491	0.040652	0.040652	0.001229	0.041881	0.361791	0.146877	1.06631	0.225452	NonVenom	NA
scaffold-mi10	5129188	5129584	intergenic|scaffold-mi10:5129188-5129584	intergenic	8.63855	crovir-transcript-12645	5145223	103.755	0.715431	15837	0.018944	0.018944	0.001229	0.020173	0.174265	0.060849	0.391132	0.092581	NonVenom	NA
scaffold-mi10	5146579	5146791	intergenic|scaffold-mi10:5146579-5146791	intergenic	1.78422	crovir-transcript-12645	5145223	103.755	0.715431	1462	0.096378	0.096378	0.001229	0.097607	0.174152	0.06081	0.220236	0.05213	NonVenom	NA
scaffold-mi10	5154341	5154842	intergenic|scaffold-mi10:5154341-5154842	intergenic	6.08093	crovir-transcript-12645	5145223	103.755	0.715431	9368.5	0.096378	0.096378	0.001229	0.097607	0.593542	0.20725	0.434709	0.102895	NonVenom	NA
scaffold-mi10	5169155	5169572	intergenic|scaffold-mi10:5169155-5169572	intergenic	9.78347	crovir-transcript-12634	5127895	363.526	0.816846	41468.5	0.01519	0.01519	0.001229	0.016419	0.160639	0.065215	0.19173	0.040538	NonVenom	NA
scaffold-mi10	5169155	5169572	intergenic|scaffold-mi10:5169155-5169572	intergenic	9.78347	crovir-transcript-12645	5145223	103.755	0.715431	24140.5	0.014116	0.014116	0.001229	0.015345	0.15013	0.052422	0.30698	0.072662	NonVenom	NA
scaffold-mi10	5215433	5216794	genic|scaffold-mi10:5215433-5216794	genic	18.7247	crovir-transcript-12634	5127895	363.526	0.816846	88218.5	0.006331	0.006331	0.001229	0.007561	0.141569	0.057473	0.190281	0.040232	NonVenom	NA
scaffold-mi10	5372249	5372784	intergenic|scaffold-mi10:5372249-5372784	intergenic	6.03795	crovir-transcript-12630	5368216	159.822	0.597012	4300.5	0.013065	0.013065	0.001229	0.014294	0.086307	0.091689	0.7453	0.301808	NonVenom	NA
scaffold-mi8	756387	756824	intergenic|scaffold-mi8:756387-756824	intergenic	8.67132	crovir-transcript-15985	765739	158.253	0.649299	9133.5	0.020965	0.020965	0.001229	0.022194	0.192455	0.085468	0.63374	0.155241	NonVenom	NA
scaffold-mi8	756387	756824	intergenic|scaffold-mi8:756387-756824	intergenic	8.67132	crovir-transcript-15974	773758	503.476	0.849031	17152.5	0.03247	0.03247	0.001229	0.033699	0.292214	0.14952	0.366286	0.104583	NonVenom	NA
scaffold-mi8	764005	764390	genic|scaffold-mi8:764005-764390	genic	6.75372	crovir-transcript-15985	765739	158.253	0.649299	1541.5	0.158459	0.158459	0.001229	0.159688	1.07849	0.478952	0.833652	0.204212	NonVenom	NA
scaffold-mi8	764005	764390	genic|scaffold-mi8:764005-764390	genic	6.75372	crovir-transcript-15974	773758	503.476	0.849031	9560.5	0.084693	0.084693	0.001229	0.085922	0.580292	0.296923	0.474359	0.13544	NonVenom	NA
scaffold-mi8	771207	771597	intergenic|scaffold-mi8:771207-771597	intergenic	9.23851	crovir-transcript-15985	765739	158.253	0.649299	5663	0.024875	0.024875	0.001229	0.026104	0.241165	0.1071	1.02331	0.25067	NonVenom	NA
scaffold-mi8	771207	771597	intergenic|scaffold-mi8:771207-771597	intergenic	9.23851	crovir-transcript-15974	773758	503.476	0.849031	2356	0.035655	0.035655	0.001229	0.036885	0.340759	0.174359	1.14037	0.3256	NonVenom	NA
scaffold-mi8	1067304	1067731	genic|scaffold-mi8:1067304-1067731	genic	3.01097	crovir-transcript-16006	1074231	139.82	0.542661	6713.5	0.059853	0.059853	0.001229	0.061082	0.183915	0.11632	0.287625	0.123054	NonVenom	NA
scaffold-mi8	1613669	1614003	genic|scaffold-mi8:1613669-1614003	genic	1.40895	crovir-transcript-16021	1618617	200.639	0.569078	4781	0.050131	0.050131	0.001229	0.05136	0.072364	0.057872	0.173916	0.104765	NonVenom	NA
scaffold-mi8	1824904	1825141	genic|scaffold-mi8:1824904-1825141	genic	1.44631	crovir-transcript-16032	1830414	304.137	0.795834	5391.5	0.110896	0.110896	0.001229	0.112125	0.162167	0.101015	0.167196	0.07324	NonVenom	NA
scaffold-mi8	1976138	1976443	genic|scaffold-mi8:1976138-1976443	genic	1.04324	crovir-transcript-16027	1974120	112.322	0.543967	2170.5	0.057886	0.057886	0.001229	0.059115	0.061672	0.056571	0.128773	0.044418	NonVenom	NA
scaffold-mi8	2377386	2377659	genic|scaffold-mi8:2377386-2377659	genic	1.94502	crovir-transcript-16057	2374514	144.386	0.962713	3008.5	0.140026	0.140026	0.001229	0.141255	0.274744	0.086154	0.240086	0.070124	NonVenom	NA
scaffold-mi8	3043936	3044089	intergenic|scaffold-mi8:3043936-3044089	intergenic	0.91425	crovir-transcript-16081	3041700	158.507	0.654946	2312.5	0.101802	0.101802	0.001229	0.103031	0.094196	0.067031	0.112851	0.057343	NonVenom	NA
scaffold-mi8	3416145	3416545	genic|scaffold-mi8:3416145-3416545	genic	2.20812	crovir-transcript-16091	3419847	717.312	0.728184	3502	0.082001	0.082001	0.001229	0.08323	0.183782	0.11752	0.272562	0.127662	NonVenom	NA
scaffold-mi8	4325554	4326093	intergenic|scaffold-mi8:4325554-4326093	intergenic	16.4898	crovir-transcript-16124	4320208	120.825	0.912188	5615.5	0.142418	0.142418	0.001229	0.143647	2.36871	0.379587	1.83993	0.293658	NonVenom	NA
scaffold-mi8	4329250	4329740	intergenic|scaffold-mi8:4329250-4329740	intergenic	5.15379	crovir-transcript-16124	4320208	120.825	0.912188	9287	0.142418	0.142418	0.001229	0.143647	0.740327	0.118638	0.371241	0.059251	NonVenom	NA
scaffold-mi8	4556557	4557133	intergenic|scaffold-mi8:4556557-4557133	intergenic	12.0138	crovir-transcript-16140	4573988	110.374	0.89737	17143	0.023129	0.023129	0.001229	0.024358	0.292638	0.090238	0.507722	0.088486	NonVenom	NA
scaffold-mi8	4556557	4557133	intergenic|scaffold-mi8:4556557-4557133	intergenic	12.0138	crovir-transcript-16142	4577251	149.365	0.971701	20406	0.022824	0.022824	0.001229	0.024053	0.288968	0.081686	0.436311	0.078054	NonVenom	NA
scaffold-mi8	4557578	4558277	genic|scaffold-mi8:4557578-4558277	genic	12.8408	crovir-transcript-16140	4573988	110.374	0.89737	16060.5	0.023129	0.023129	0.001229	0.024358	0.312781	0.09645	0.574354	0.100099	NonVenom	NA
scaffold-mi8	4557578	4558277	genic|scaffold-mi8:4557578-4558277	genic	12.8408	crovir-transcript-16142	4577251	149.365	0.971701	19323.5	0.022824	0.022824	0.001229	0.024053	0.308858	0.087309	0.488989	0.087478	NonVenom	NA
scaffold-mi8	4973982	4974295	intergenic|scaffold-mi8:4973982-4974295	intergenic	5.78219	crovir-transcript-16154	4992795	1763.54	0.755207	18656.5	0.025639	0.025639	0.001229	0.026868	0.155356	0.061273	0.227024	0.047403	NonVenom	NA
scaffold-mi8	4997702	4998047	genic|scaffold-mi8:4997702-4998047	genic	5.4857	crovir-transcript-16154	4992795	1763.54	0.755207	5079.5	0.052522	0.052522	0.001229	0.053752	0.294865	0.116296	0.667905	0.139459	NonVenom	NA
scaffold-mi8	5252307	5253026	intergenic|scaffold-mi8:5252307-5253026	intergenic	10.2398	crovir-transcript-15993	1078774	104.043	0.552742	4.17389e+06	0.00555	0.00555	0.000355	0.005905	0.060464	0.052931	0.003631	0.001622	NonVenom	NA
scaffold-mi8	5388782	5389287	genic|scaffold-mi8:5388782-5389287	genic	8.27947	crovir-transcript-16188	5381483	169.849	0.973826	7551.5	0.109934	0.109934	0.001229	0.111164	0.920376	0.167552	0.713979	0.112172	NonVenom	NA
scaffold-mi8	5583058	5583333	intergenic|scaffold-mi8:5583058-5583333	intergenic	37.9474	crovir-transcript-16188	5381483	169.849	0.973826	201712	0.007399	0.007399	0.001229	0.008628	0.327423	0.059606	0.187795	0.029504	NonVenom	NA
scaffold-mi8	5895911	5896426	genic|scaffold-mi8:5895911-5896426	genic	6.84257	crovir-transcript-16198	5892802	615.902	0.977774	3366.5	0.106175	0.106175	0.001229	0.107404	0.73492	0.162301	0.84462	0.130072	NonVenom	NA
scaffold-mi8	6221006	6221454	genic|scaffold-mi8:6221006-6221454	genic	15.0928	crovir-transcript-16218	6197806	3492.57	0.922755	23424	0.009607	0.009607	0.001229	0.010836	0.163551	0.055804	0.486149	0.117475	NonVenom	NA
scaffold-mi8	7064262	7064574	intergenic|scaffold-mi8:7064262-7064574	intergenic	2.57006	crovir-transcript-16257	7062897	238.637	0.82808	1521	0.079942	0.079942	0.001229	0.081171	0.208614	0.083022	0.317238	0.102111	NonVenom	NA
scaffold-mi8	7344898	7345870	genic|scaffold-mi8:7344898-7345870	genic	17.2945	crovir-transcript-16264	7257329	4942.48	0.895124	88055	0.017424	0.017424	0.001229	0.018653	0.322602	0.116561	0.176031	0.045816	NonVenom	NA
scaffold-mi8	7481145	7481389	intergenic|scaffold-mi8:7481145-7481389	intergenic	1.81526	crovir-transcript-16277	7479265	131.209	0.525172	2002	0.140323	0.140323	0.001229	0.141552	0.256953	0.121461	0.224068	0.079504	NonVenom	NA
scaffold-mi8	8603214	8604041	genic|scaffold-mi8:8603214-8604041	genic	13.5709	crovir-transcript-16357	8561817	270.513	0.571021	41810.5	0.005628	0.005628	0.001229	0.006857	0.093057	0.053842	0.264059	0.090985	NonVenom	NA
scaffold-mi8	8714079	8714460	intergenic|scaffold-mi8:8714079-8714460	intergenic	6.01396	crovir-transcript-16352	8712755	1692.91	0.820732	1514.5	0.102703	0.102703	0.001229	0.103932	0.625045	0.178441	0.742339	0.164776	NonVenom	NA
scaffold-mi8	8778107	8778379	intergenic|scaffold-mi8:8778107-8778379	intergenic	4.04745	crovir-transcript-16334	8784517	8194.02	0.923423	6274	0.045102	0.045102	0.001229	0.046331	0.187524	0.060206	0.41009	0.063136	NonVenom	NA
scaffold-mi8	8778567	8778973	intergenic|scaffold-mi8:8778567-8778973	intergenic	6.576	crovir-transcript-16334	8784517	8194.02	0.923423	5747	0.045102	0.045102	0.001229	0.046331	0.304675	0.097818	0.719124	0.110715	NonVenom	NA
scaffold-mi8	8780766	8780996	intergenic|scaffold-mi8:8780766-8780996	intergenic	4.14837	crovir-transcript-16334	8784517	8194.02	0.923423	3636	0.045102	0.045102	0.001229	0.046331	0.1922	0.061707	0.512059	0.078835	NonVenom	NA
scaffold-mi8	8787919	8789205	intergenic|scaffold-mi8:8787919-8789205	intergenic	10.2425	crovir-transcript-16334	8784517	8194.02	0.923423	4045	0.02971	0.02971	0.001229	0.030939	0.316898	0.101743	1.2643	0.194649	NonVenom	NA
scaffold-mi8	9155999	9156364	genic|scaffold-mi8:9155999-9156364	genic	4.73091	crovir-transcript-16360	9152140	156.248	0.859902	4041.5	0.112565	0.112565	0.001229	0.113794	0.538349	0.145287	0.583965	0.092382	NonVenom	NA
scaffold-mi8	9992681	9992981	genic|scaffold-mi8:9992681-9992981	genic	3.68939	crovir-transcript-16412	9990533	190.329	0.881096	2298	0.094318	0.094318	0.001229	0.095548	0.352513	0.073501	0.455404	0.071782	NonVenom	NA
scaffold-mi8	9997948	9998369	genic|scaffold-mi8:9997948-9998369	genic	12.1848	crovir-transcript-16412	9990533	190.329	0.881096	7625.5	0.094318	0.094318	0.001229	0.095548	1.16422	0.242747	1.04187	0.164224	NonVenom	NA
scaffold-mi8	10032763	10033783	genic|scaffold-mi8:10032763-10033783	genic	23.153	crovir-transcript-16423	9931043	106.029	0.655705	102230	0.007238	0.007238	0.001229	0.008467	0.196035	0.092049	0.206962	0.061533	NonVenom	NA
scaffold-mi8	10032763	10033783	genic|scaffold-mi8:10032763-10033783	genic	23.153	crovir-transcript-16412	9990533	190.329	0.881096	42740	0.018427	0.018427	0.001229	0.019656	0.455101	0.094891	0.44197	0.069665	NonVenom	NA
scaffold-mi8	10054161	10055006	intergenic|scaffold-mi8:10054161-10055006	intergenic	17.9148	crovir-transcript-16417	10048284	204.645	0.425973	6299.5	0.080165	0.080165	0.001229	0.081394	1.45816	0.403356	1.80874	0.243002	NonVenom	NA
scaffold-mi8	10055592	10056554	intergenic|scaffold-mi8:10055592-10056554	intergenic	20.4782	crovir-transcript-16417	10048284	204.645	0.425973	7789	0.015055	0.015055	0.001229	0.016284	0.333471	0.092244	1.719	0.230945	NonVenom	NA
scaffold-mi8	10526109	10526247	genic|scaffold-mi8:10526109-10526247	genic	2.24462	crovir-transcript-16467	10526794	171.869	0.78545	616	0.085034	0.085034	0.001229	0.086263	0.193629	0.070513	0.277067	0.080179	NonVenom	NA
scaffold-mi8	10530373	10530610	genic|scaffold-mi8:10530373-10530610	genic	2.88797	crovir-transcript-16467	10526794	171.869	0.78545	3697.5	0.085034	0.085034	0.001229	0.086263	0.249126	0.090724	0.35648	0.103159	NonVenom	NA
scaffold-mi8	10944592	10944834	genic|scaffold-mi8:10944592-10944834	genic	7.35308	crovir-transcript-16464	10947412	823.657	0.998239	2699	0.131024	0.131024	0.001229	0.132254	0.97247	0.113878	0.907635	0.104069	NonVenom	NA
scaffold-mi8	10948028	10948272	intergenic|scaffold-mi8:10948028-10948272	intergenic	7.49431	crovir-transcript-16464	10947412	823.657	0.998239	738	0.131024	0.131024	0.001229	0.132254	0.991148	0.116065	0.925068	0.106068	NonVenom	NA
scaffold-ma6	3527090	3527646	genic|scaffold-ma6:3527090-3527646	genic	7.026	crovir-transcript-11633	2750944	4346.19	0.403747	776424	0	0	0.001229	0.001229	0.008636	0.050168	0.010763	0.023982	NonVenom	NA
scaffold-ma6	5705601	5706407	intergenic|scaffold-ma6:5705601-5706407	intergenic	18.4167	crovir-transcript-11633	2750944	4346.19	0.403747	2955060	0	0	0.000479	0.000479	0.008819	0.051231	0.008819	0.01965	NonVenom	NA
scaffold-ma6	7296299	7296600	genic|scaffold-ma6:7296299-7296600	genic	2.42203	crovir-transcript-11691	7297848	227.852	0.835368	1398.5	0.101781	0.101781	0.001229	0.10301	0.249493	0.174839	0.298965	0.149509	NonVenom	NA
scaffold-ma6	7333159	7333353	intergenic|scaffold-ma6:7333159-7333353	intergenic	2.15491	crovir-transcript-11689	7355430	128.654	0.920386	22174	0.040373	0.040373	0.001229	0.041602	0.089648	0.065719	0.072803	0.025705	NonVenom	NA
scaffold-ma6	7333955	7334279	intergenic|scaffold-ma6:7333955-7334279	intergenic	4.15924	crovir-transcript-11689	7355430	128.654	0.920386	21313	0.040373	0.040373	0.001229	0.041602	0.173033	0.126846	0.145445	0.051352	NonVenom	NA
scaffold-ma6	7361998	7362300	genic|scaffold-ma6:7361998-7362300	genic	2.63481	crovir-transcript-11689	7355430	128.654	0.920386	6719	0.034604	0.034604	0.001229	0.035833	0.094414	0.069212	0.251512	0.088801	NonVenom	NA
scaffold-ma6	11201136	11201996	intergenic|scaffold-ma6:11201136-11201996	intergenic	26.792	crovir-transcript-11706	11242152	442.044	0.897796	40586	0.007071	0.007071	0.001229	0.0083	0.222385	0.098866	0.534971	0.11945	NonVenom	NA
scaffold-ma6	11201136	11201996	intergenic|scaffold-ma6:11201136-11201996	intergenic	26.792	crovir-transcript-11710	11488796	187.389	0.961499	287230	0.003562	0.003562	0.001229	0.004792	0.128376	0.060105	0.097491	0.029237	NonVenom	NA
scaffold-ma6	11480047	11481089	intergenic|scaffold-ma6:11480047-11481089	intergenic	5.78392	crovir-transcript-11710	11488796	187.389	0.961499	8228	0.064107	0.064107	0.001229	0.065336	0.377901	0.17693	0.462905	0.138823	NonVenom	NA
scaffold-ma6	12534116	12534741	genic|scaffold-ma6:12534116-12534741	genic	12.0607	crovir-transcript-11715	12533121	153.763	0.38064	1307.5	0.141528	0.141528	0.001229	0.142757	1.72175	0.716578	1.48873	0.531146	NonVenom	NA
scaffold-ma6	12616160	12616530	genic|scaffold-ma6:12616160-12616530	genic	4.05005	crovir-transcript-11725	12623171	133.242	0.829234	6826	0.042698	0.042698	0.001229	0.043927	0.177907	0.149078	0.38133	0.114952	NonVenom	NA
scaffold-ma6	12616946	12617157	genic|scaffold-ma6:12616946-12617157	genic	3.61499	crovir-transcript-11725	12623171	133.242	0.829234	6119.5	0.042698	0.042698	0.001229	0.043927	0.158797	0.133064	0.374304	0.112834	NonVenom	NA
scaffold-ma6	16122707	16123762	intergenic|scaffold-ma6:16122707-16123762	intergenic	36.8963	crovir-transcript-11751	16133892	455.648	0.584138	10657.5	0.016818	0.016818	0.001229	0.018048	0.665892	0.440016	2.35781	0.629575	NonVenom	NA
scaffold-ma6	16139746	16140063	genic|scaffold-ma6:16139746-16140063	genic	4.85975	crovir-transcript-11751	16133892	455.648	0.584138	6012.5	0.086488	0.086488	0.001229	0.087718	0.426286	0.281687	0.510969	0.136437	NonVenom	NA
scaffold-ma6	23454384	23455154	intergenic|scaffold-ma6:23454384-23455154	intergenic	15.0412	crovir-transcript-11803	23459917	364.81	0.635756	5148	0.015635	0.015635	0.001229	0.016864	0.253652	0.331025	1.81011	0.657268	NonVenom	NA
scaffold-ma6	23708257	23708831	intergenic|scaffold-ma6:23708257-23708831	intergenic	40.101	crovir-transcript-11803	23459917	364.81	0.635756	248627	0	0	0.001229	0.001229	0.049292	0.064328	0.165443	0.060074	NonVenom	NA
scaffold-ma6	32253903	32254749	intergenic|scaffold-ma6:32253903-32254749	intergenic	9.41655	crovir-transcript-11882	32226859	124.506	0.997267	27467	0.019262	0.019262	0.001229	0.020491	0.192952	0.05225	0.264079	0.059469	NonVenom	NA
scaffold-ma6	36356025	36356503	genic|scaffold-ma6:36356025-36356503	genic	7.16648	crovir-transcript-11914	36602198	1721.04	0.683519	245934	0.00397	0.00397	0.001229	0.005199	0.037259	0.06604	0.029848	0.046309	NonVenom	NA
scaffold-ma6	36542388	36543175	intergenic|scaffold-ma6:36542388-36543175	intergenic	14.4658	crovir-transcript-11914	36602198	1721.04	0.683519	59416.5	0.009354	0.009354	0.001229	0.010583	0.153096	0.271353	0.207328	0.321673	NonVenom	NA
scaffold-ma6	44881725	44881894	intergenic|scaffold-ma6:44881725-44881894	intergenic	1.13804	crovir-transcript-12005	44887969	452.995	0.437542	6159.5	0.094434	0.094434	0.001229	0.095664	0.108869	0.063203	0.117169	0.060815	NonVenom	NA
scaffold-ma6	44889520	44889811	intergenic|scaffold-ma6:44889520-44889811	intergenic	2.64457	crovir-transcript-12005	44887969	452.995	0.437542	1696.5	0.094434	0.094434	0.001229	0.095664	0.252989	0.146872	0.326435	0.169432	NonVenom	NA
scaffold-ma6	46591935	46592081	genic|scaffold-ma6:46591935-46592081	genic	1.93042	crovir-transcript-12042	46598019	3768.95	0.936297	6011	0.097767	0.097767	0.001229	0.098996	0.191104	0.053133	0.203014	0.048485	NonVenom	NA
scaffold-ma6	46592729	46592942	genic|scaffold-ma6:46592729-46592942	genic	2.87639	crovir-transcript-12042	46598019	3768.95	0.936297	5183.5	0.097767	0.097767	0.001229	0.098996	0.284753	0.07917	0.344092	0.082178	NonVenom	NA
scaffold-ma6	46599681	46599954	intergenic|scaffold-ma6:46599681-46599954	intergenic	3.60947	crovir-transcript-12042	46598019	3768.95	0.936297	1798.5	0.097767	0.097767	0.001229	0.098996	0.357325	0.099347	0.445539	0.106406	NonVenom	NA
scaffold-ma6	46806755	46807285	intergenic|scaffold-ma6:46806755-46807285	intergenic	6.07816	crovir-transcript-12048	46807854	102.903	0.846663	834	0.117433	0.117433	0.001229	0.118662	0.721247	0.24965	0.750264	0.214094	NonVenom	NA
scaffold-ma6	47959431	47959746	intergenic|scaffold-ma6:47959431-47959746	intergenic	10.6005	crovir-transcript-12076	48059296	142.969	0.981842	99707.5	0.014474	0.014474	0.001229	0.015703	0.166461	0.059181	0.096839	0.019526	NonVenom	NA
scaffold-ma6	48023807	48024269	intergenic|scaffold-ma6:48023807-48024269	intergenic	25.2338	crovir-transcript-12105	49778953	130.218	0.206382	1754915	0.003127	0.003127	0.000754	0.003881	0.097923	0.052836	0.019015	0.007206	NonVenom	NA
scaffold-ma6	48135010	48135779	intergenic|scaffold-ma6:48135010-48135779	intergenic	17.623	crovir-transcript-12073	48110255	109.09	0.968118	25139.5	0.009625	0.009625	0.001229	0.010854	0.191289	0.059967	0.533798	0.101014	NonVenom	NA
scaffold-ma6	49173081	49173568	intergenic|scaffold-ma6:49173081-49173568	intergenic	17.4705	crovir-transcript-12088	49172339	976.864	0.995506	985.5	0.121651	0.121651	0.001229	0.12288	2.14677	0.333855	2.15648	0.29742	NonVenom	NA
scaffold-ma6	49343203	49343706	intergenic|scaffold-ma6:49343203-49343706	intergenic	4.97688	crovir-transcript-12090	49345254	1118.35	0.92822	1799.5	0.044173	0.044173	0.001229	0.045402	0.225962	0.060556	0.614327	0.110123	NonVenom	NA
scaffold-ma6	49346534	49346764	genic|scaffold-ma6:49346534-49346764	genic	3.27672	crovir-transcript-12090	49345254	1118.35	0.92822	1395	0.109106	0.109106	0.001229	0.110335	0.361537	0.096888	0.404466	0.072503	NonVenom	NA
scaffold-ma6	49745600	49745893	genic|scaffold-ma6:49745600-49745893	genic	3.38048	crovir-transcript-12097	49744808	115.96	0.973644	938.5	0.123648	0.123648	0.001229	0.124878	0.422147	0.086269	0.417273	0.080674	NonVenom	NA
scaffold-ma6	49775178	49775414	genic|scaffold-ma6:49775178-49775414	genic	2.06059	crovir-transcript-12105	49778953	130.218	0.206382	3657	0.087648	0.087648	0.001229	0.088877	0.183138	0.098815	0.254351	0.096382	NonVenom	NA
scaffold-ma6	50411697	50412126	intergenic|scaffold-ma6:50411697-50412126	intergenic	4.76293	crovir-transcript-12127	50407147	159.661	0.90903	4764.5	0.07313	0.07313	0.001229	0.074359	0.354168	0.138469	0.587918	0.154395	NonVenom	NA
scaffold-ma6	50516543	50516743	genic|scaffold-ma6:50516543-50516743	genic	1.01682	crovir-transcript-12130	50518099	103.947	0.419141	1456	0.089871	0.089871	0.001229	0.0911	0.092633	0.06002	0.125513	0.048312	NonVenom	NA
scaffold-ma6	50528270	50528731	intergenic|scaffold-ma6:50528270-50528731	intergenic	2.46375	crovir-transcript-12130	50518099	103.947	0.419141	10401.5	0.041791	0.041791	0.001229	0.04302	0.105991	0.068675	0.160809	0.061899	NonVenom	NA
scaffold-ma6	52742784	52743818	intergenic|scaffold-ma6:52742784-52743818	intergenic	44.1957	crovir-transcript-12105	49778953	130.218	0.206382	2964348	0.00336	0.00336	0.000478	0.003837	0.169595	0.091508	0.021107	0.007998	NonVenom	NA
scaffold-ma6	55225323	55226046	intergenic|scaffold-ma6:55225323-55226046	intergenic	10.6912	crovir-transcript-12178	55267729	128.081	0.866885	42044.5	0.010287	0.010287	0.001229	0.011517	0.123126	0.059273	0.20702	0.060594	NonVenom	NA
scaffold-ma6	55262153	55262609	intergenic|scaffold-ma6:55262153-55262609	intergenic	6.70666	crovir-transcript-12178	55267729	128.081	0.866885	5348	0.052883	0.052883	0.001229	0.054112	0.362913	0.174705	0.780784	0.228533	NonVenom	NA
scaffold-ma6	58445738	58446309	genic|scaffold-ma6:58445738-58446309	genic	12.9486	crovir-transcript-12234	58433068	120.234	0.904536	12955.5	0.00851	0.00851	0.001229	0.009739	0.126105	0.063378	0.698203	0.168465	NonVenom	NA
scaffold-ma6	64311413	64311814	genic|scaffold-ma6:64311413-64311814	genic	6.16177	crovir-transcript-12306	64309738	340.225	0.984575	1875.5	0.163551	0.163551	0.001229	0.16478	1.01534	0.147683	0.760585	0.130221	NonVenom	NA
scaffold-ma6	68775253	68775817	intergenic|scaffold-ma6:68775253-68775817	intergenic	12.2647	crovir-transcript-12342	69261193	444.944	0.679723	485658	0	0	0.001229	0.001229	0.015076	0.064961	0.02826	0.044371	NonVenom	NA
scaffold-ma6	68893658	68894247	intergenic|scaffold-ma6:68893658-68894247	intergenic	7.8877	crovir-transcript-12336	68896291	255.292	0.064068	2338.5	0.019362	0.019362	0.001229	0.020591	0.162414	0.232273	0.973627	0.402974	NonVenom	NA
scaffold-ma6	68904106	68904231	intergenic|scaffold-ma6:68904106-68904231	intergenic	1.18856	crovir-transcript-12336	68896291	255.292	0.064068	7877.5	0.144803	0.144803	0.001229	0.146033	0.173569	0.248225	0.098795	0.04089	NonVenom	NA
scaffold-ma6	68972536	68972906	genic|scaffold-ma6:68972536-68972906	genic	3.89172	crovir-transcript-12356	68956082	138.465	0.532914	16639	0.021137	0.021137	0.001229	0.022367	0.087044	0.109472	0.168795	0.096479	NonVenom	NA
scaffold-ma6	68978303	68978560	genic|scaffold-ma6:68978303-68978560	genic	3.66086	crovir-transcript-12356	68956082	138.465	0.532914	22349.5	0.018129	0.018129	0.001229	0.019358	0.070868	0.089127	0.122836	0.07021	NonVenom	NA
scaffold-ma6	68980277	68981351	genic|scaffold-ma6:68980277-68981351	genic	15.2676	crovir-transcript-12356	68956082	138.465	0.532914	24732	0.016389	0.016389	0.001229	0.017619	0.268992	0.338299	0.469073	0.268112	NonVenom	NA
scaffold-ma6	68980277	68981351	genic|scaffold-ma6:68980277-68981351	genic	15.2676	crovir-transcript-12342	69261193	444.944	0.679723	280379	0	0	0.001229	0.001229	0.018767	0.080866	0.056735	0.08908	NonVenom	NA
scaffold-ma6	68981532	68981813	genic|scaffold-ma6:68981532-68981813	genic	3.30473	crovir-transcript-12356	68956082	138.465	0.532914	25590.5	0.016389	0.016389	0.001229	0.017619	0.058224	0.073226	0.098563	0.056336	NonVenom	NA
scaffold-ma6	69412679	69412832	intergenic|scaffold-ma6:69412679-69412832	intergenic	0.841734	crovir-transcript-12347	69411839	354.639	0.528056	916.5	0.043494	0.043494	0.001229	0.044724	0.037645	0.094191	0.1039	0.115492	NonVenom	NA
scaffold-mi3	182259	183597	genic|scaffold-mi3:182259-183597	genic	29.5477	crovir-transcript-11048	694886	115.036	0.780288	511958	0.004708	0.004708	0.001229	0.005937	0.175419	0.090195	0.06503	0.023905	NonVenom	NA
scaffold-mi3	182259	183597	genic|scaffold-mi3:182259-183597	genic	29.5477	crovir-transcript-11050	722985	101.298	0.809133	540057	0.001949	0.001949	0.001229	0.003178	0.093911	0.090407	0.062076	0.031214	NonVenom	NA
scaffold-mi3	693372	694070	genic|scaffold-mi3:693372-694070	genic	9.72174	crovir-transcript-11048	694886	115.036	0.780288	1165	0.065328	0.065328	0.001229	0.066558	0.647056	0.332695	1.20001	0.441123	NonVenom	NA
scaffold-mi3	716013	716259	genic|scaffold-mi3:716013-716259	genic	1.87396	crovir-transcript-11050	722985	101.298	0.809133	6849	0.102871	0.102871	0.001229	0.1041	0.19508	0.187802	0.175927	0.088463	NonVenom	NA
scaffold-mi3	1355993	1356333	intergenic|scaffold-mi3:1355993-1356333	intergenic	1.80453	crovir-transcript-11063	1364193	299.496	0.588571	8030	0.074684	0.074684	0.001229	0.075913	0.136987	0.139743	0.147515	0.081361	NonVenom	NA
scaffold-mi3	1493609	1494405	intergenic|scaffold-mi3:1493609-1494405	intergenic	8.95306	crovir-transcript-11069	1497151	103.197	0.529574	3144	0.016784	0.016784	0.001229	0.018014	0.161277	0.16495	1.10513	0.422549	NonVenom	NA
scaffold-mi3	1506039	1506362	genic|scaffold-mi3:1506039-1506362	genic	4.34607	crovir-transcript-11069	1497151	103.197	0.529574	9049.5	0.015556	0.015556	0.001229	0.016786	0.072951	0.074613	0.320194	0.122427	NonVenom	NA
scaffold-mi3	3180486	3180798	genic|scaffold-mi3:3180486-3180798	genic	1.43346	crovir-transcript-11103	3188395	213.623	0.338404	7753	0.146815	0.146815	0.001229	0.148044	0.212215	0.154431	0.120815	0.088679	NonVenom	NA
scaffold-mi3	3186001	3186349	genic|scaffold-mi3:3186001-3186349	genic	2.69026	crovir-transcript-11103	3188395	213.623	0.338404	2220	0.146815	0.146815	0.001229	0.148044	0.398277	0.289831	0.332076	0.243747	NonVenom	NA
scaffold-mi3	3389358	3389535	intergenic|scaffold-mi3:3389358-3389535	intergenic	1.92835	crovir-transcript-11108	3390838	146.041	0.448746	1391.5	0.089211	0.089211	0.001229	0.090441	0.174401	0.130414	0.238028	0.153215	NonVenom	NA
scaffold-mi3	3394191	3394644	genic|scaffold-mi3:3394191-3394644	genic	1.09714	crovir-transcript-11108	3390838	146.041	0.448746	3579.5	0.089211	0.089211	0.001229	0.090441	0.099226	0.074199	0.135427	0.087172	NonVenom	NA
scaffold-mi3	3418864	3419395	genic|scaffold-mi3:3418864-3419395	genic	4.92758	crovir-transcript-11108	3390838	146.041	0.448746	28291.5	0.017343	0.017343	0.001229	0.018572	0.091517	0.068434	0.134679	0.086691	NonVenom	NA
scaffold-mi3	3528658	3529218	intergenic|scaffold-mi3:3528658-3529218	intergenic	9.86979	crovir-transcript-11108	3390838	146.041	0.448746	138100	0.020404	0.020404	0.001229	0.021634	0.21352	0.159666	0.067914	0.043715	NonVenom	NA
scaffold-mi3	3528658	3529218	intergenic|scaffold-mi3:3528658-3529218	intergenic	9.86979	crovir-transcript-11125	3682592	304.053	0.717617	153654	0.006546	0.006546	0.001229	0.007775	0.076741	0.062873	0.061892	0.043309	NonVenom	NA
scaffold-mi3	3681144	3681457	intergenic|scaffold-mi3:3681144-3681457	intergenic	2.51209	crovir-transcript-11125	3682592	304.053	0.717617	1291.5	0.123467	0.123467	0.001229	0.124696	0.313249	0.256637	0.310083	0.216982	NonVenom	NA
scaffold-mi3	3681144	3681457	intergenic|scaffold-mi3:3681144-3681457	intergenic	2.51209	crovir-transcript-11126	3688585	252.903	0.614988	7284.5	0.109166	0.109166	0.001229	0.110395	0.277324	0.272309	0.223521	0.165722	NonVenom	NA
scaffold-mi3	4157578	4158114	intergenic|scaffold-mi3:4157578-4158114	intergenic	7.0006	crovir-transcript-11149	4186484	433.143	0.336218	28638	0.009241	0.009241	0.001229	0.01047	0.073295	0.063815	0.189323	0.095521	NonVenom	NA
scaffold-mi3	4161468	4161842	intergenic|scaffold-mi3:4161468-4161842	intergenic	6.05259	crovir-transcript-11149	4186484	433.143	0.336218	24829	0.009559	0.009559	0.001229	0.010788	0.065297	0.056851	0.185325	0.093504	NonVenom	NA
scaffold-mi3	4275105	4275663	intergenic|scaffold-mi3:4275105-4275663	intergenic	14.1055	crovir-transcript-11149	4186484	433.143	0.336218	88900	0.006888	0.006888	0.001229	0.008117	0.114491	0.099683	0.142384	0.071839	NonVenom	NA
scaffold-mi3	4275105	4275663	intergenic|scaffold-mi3:4275105-4275663	intergenic	14.1055	crovir-transcript-11152	4687372	139.892	0.711301	411988	0.003712	0.003712	0.001229	0.004941	0.069702	0.061375	0.037503	0.027658	NonVenom	NA
scaffold-mi3	4680263	4680501	intergenic|scaffold-mi3:4680263-4680501	intergenic	1.27443	crovir-transcript-11152	4687372	139.892	0.711301	6990	0.086567	0.086567	0.001229	0.087797	0.111891	0.098524	0.117541	0.086686	NonVenom	NA
scaffold-mi3	4686244	4686418	intergenic|scaffold-mi3:4686244-4686418	intergenic	0.742095	crovir-transcript-11152	4687372	139.892	0.711301	1041	0.086567	0.086567	0.001229	0.087797	0.065153	0.05737	0.091601	0.067555	NonVenom	NA
scaffold-mi3	4690960	4691352	genic|scaffold-mi3:4690960-4691352	genic	1.77044	crovir-transcript-11152	4687372	139.892	0.711301	3784	0.083337	0.083337	0.001229	0.084566	0.149719	0.131833	0.218536	0.161168	NonVenom	NA
scaffold-mi3	6892676	6893169	intergenic|scaffold-mi3:6892676-6893169	intergenic	4.73325	crovir-transcript-11193	6889940	216.882	0.675776	2982.5	0.117782	0.117782	0.001229	0.119011	0.563309	0.415004	0.584254	0.269078	NonVenom	NA
scaffold-mi3	6892676	6893169	intergenic|scaffold-mi3:6892676-6893169	intergenic	4.73325	crovir-transcript-11190	6899124	374.938	0.607761	6201.5	0.058104	0.058104	0.001229	0.059334	0.280841	0.249385	0.484449	0.240447	NonVenom	NA
scaffold-mi3	6905386	6906511	intergenic|scaffold-mi3:6905386-6906511	intergenic	2.05053	crovir-transcript-11190	6899124	374.938	0.607761	6824.5	0.026456	0.026456	0.001229	0.027685	0.056769	0.050411	0.193103	0.095843	NonVenom	NA
scaffold-mi3	6965714	6966280	intergenic|scaffold-mi3:6965714-6966280	intergenic	7.42176	crovir-transcript-11190	6899124	374.938	0.607761	66873	0.008703	0.008703	0.001229	0.009932	0.073713	0.065456	0.095974	0.047635	NonVenom	NA
scaffold-mi3	7268299	7268708	genic|scaffold-mi3:7268299-7268708	genic	9.46139	crovir-transcript-11202	7271704	104.358	0.751624	3200.5	0.0493	0.0493	0.001229	0.050529	0.478078	0.195728	1.16788	0.228505	NonVenom	NA
scaffold-mi3	7270887	7271160	genic|scaffold-mi3:7270887-7271160	genic	8.21203	crovir-transcript-11202	7271704	104.358	0.751624	680.5	0.050175	0.050175	0.001229	0.051404	0.422129	0.172822	1.01366	0.198331	NonVenom	NA
scaffold-mi3	7270887	7271160	genic|scaffold-mi3:7270887-7271160	genic	8.21203	crovir-transcript-11198	7300440	204.558	0.536588	29416.5	0.0043	0.0043	0.001229	0.005529	0.045403	0.051557	0.216963	0.077357	NonVenom	NA
scaffold-mi3	7275339	7275458	intergenic|scaffold-mi3:7275339-7275458	intergenic	3.28491	crovir-transcript-11202	7271704	104.358	0.751624	3694.5	0.050175	0.050175	0.001229	0.051404	0.168856	0.069131	0.405476	0.079335	NonVenom	NA
scaffold-mi3	7281763	7282085	intergenic|scaffold-mi3:7281763-7282085	intergenic	4.29497	crovir-transcript-11202	7271704	104.358	0.751624	10220	0.052633	0.052633	0.001229	0.053862	0.231335	0.09471	0.284658	0.055696	NonVenom	NA
scaffold-mi3	7285059	7285245	intergenic|scaffold-mi3:7285059-7285245	intergenic	4.19883	crovir-transcript-11202	7271704	104.358	0.751624	13448	0.033618	0.033618	0.001229	0.034847	0.146316	0.059903	0.219174	0.042883	NonVenom	NA
scaffold-mi3	7285965	7286366	intergenic|scaffold-mi3:7285965-7286366	intergenic	6.60374	crovir-transcript-11202	7271704	104.358	0.751624	14461.5	0.033618	0.033618	0.001229	0.034847	0.23012	0.094212	0.323594	0.063314	NonVenom	NA
scaffold-mi3	7295516	7295819	intergenic|scaffold-mi3:7295516-7295819	intergenic	1.54174	crovir-transcript-11198	7300440	204.558	0.536588	4772.5	0.062335	0.062335	0.001229	0.063564	0.098	0.111282	0.190306	0.067852	NonVenom	NA
scaffold-mi3	7331541	7331802	intergenic|scaffold-mi3:7331541-7331802	intergenic	3.36672	crovir-transcript-11199	7312634	111.249	0.615504	19037.5	0.01291	0.01291	0.001229	0.014139	0.047603	0.059886	0.129882	0.052856	NonVenom	NA
scaffold-mi3	7718760	7719400	intergenic|scaffold-mi3:7718760-7719400	intergenic	11.1415	crovir-transcript-11212	7750643	2826.66	0.880063	31563	0.026094	0.026094	0.001229	0.027323	0.30442	0.129253	0.276865	0.088179	NonVenom	NA
scaffold-mi3	7753027	7753539	genic|scaffold-mi3:7753027-7753539	genic	7.34878	crovir-transcript-11212	7750643	2826.66	0.880063	2640	0.127086	0.127086	0.001229	0.128315	0.942958	0.400367	0.907105	0.288906	NonVenom	NA
scaffold-mi3	7757729	7757947	genic|scaffold-mi3:7757729-7757947	genic	0.940846	crovir-transcript-11212	7750643	2826.66	0.880063	7195	0.127086	0.127086	0.001229	0.128315	0.120725	0.051258	0.08462	0.026951	NonVenom	NA
scaffold-mi3	7770318	7770706	genic|scaffold-mi3:7770318-7770706	genic	6.98581	crovir-transcript-11229	7776856	147.964	0.652578	6344	0.094953	0.094953	0.001229	0.096182	0.671911	0.35081	0.701008	0.228174	NonVenom	NA
scaffold-mi3	7773604	7773854	genic|scaffold-mi3:7773604-7773854	genic	3.57605	crovir-transcript-11229	7776856	147.964	0.652578	3127	0.094953	0.094953	0.001229	0.096182	0.343952	0.17958	0.441413	0.143678	NonVenom	NA
scaffold-mi3	9206271	9206740	intergenic|scaffold-mi3:9206271-9206740	intergenic	6.69841	crovir-transcript-11260	9212596	145.312	0.734135	6090.5	0.120596	0.120596	0.001229	0.121826	0.816037	0.619188	0.696439	0.441485	NonVenom	NA
scaffold-mi3	11774868	11775162	intergenic|scaffold-mi3:11774868-11775162	intergenic	2.38368	crovir-transcript-11306	11776822	744.179	0.340651	1807	0.036769	0.036769	0.001229	0.037998	0.090576	0.108283	0.294232	0.189563	NonVenom	NA
scaffold-mi3	15255086	15255564	intergenic|scaffold-mi3:15255086-15255564	intergenic	7.1565	crovir-transcript-11358	15253249	4451.19	0.534767	2076	0.08959	0.08959	0.001229	0.09082	0.649951	0.418967	0.88337	0.346874	NonVenom	NA
scaffold-mi3	16151225	16151592	genic|scaffold-mi3:16151225-16151592	genic	2.12294	crovir-transcript-11368	16153512	172.583	0.649481	2103.5	0.108617	0.108617	0.001229	0.109846	0.233196	0.181872	0.262047	0.093179	NonVenom	NA
scaffold-mi3	16211109	16211591	intergenic|scaffold-mi3:16211109-16211591	intergenic	4.08066	crovir-transcript-11407	16222954	238.305	0.688771	11604	0.029022	0.029022	0.001229	0.030251	0.123444	0.053326	0.242164	0.045077	NonVenom	NA
scaffold-mi3	16225478	16225752	intergenic|scaffold-mi3:16225478-16225752	intergenic	5.81881	crovir-transcript-11407	16222954	238.305	0.688771	2661	0.097297	0.097297	0.001229	0.098526	0.573303	0.247659	0.718251	0.133697	NonVenom	NA
scaffold-mi3	16401785	16402026	genic|scaffold-mi3:16401785-16402026	genic	42.6911	crovir-transcript-11398	16243922	4903.56	0.961074	157984	0.004433	0.004433	0.001229	0.005662	0.241733	0.059532	0.261315	0.036195	NonVenom	NA
scaffold-mi3	16401785	16402026	genic|scaffold-mi3:16401785-16402026	genic	42.6911	crovir-transcript-11376	16370371	204.552	0.653489	31534.5	0.00743	0.00743	0.001229	0.008659	0.36967	0.176375	1.0617	0.276211	NonVenom	NA
scaffold-mi3	16401785	16402026	genic|scaffold-mi3:16401785-16402026	genic	42.6911	crovir-transcript-11386	16541453	389.883	0.576486	139548	0	0	0.001229	0.001229	0.052476	0.054022	0.291104	0.100151	NonVenom	NA
scaffold-mi3	16401785	16402026	genic|scaffold-mi3:16401785-16402026	genic	42.6911	crovir-transcript-11394	16617620	144.789	0.587053	215714	0.003974	0.003974	0.001229	0.005203	0.222114	0.159085	0.199289	0.093003	NonVenom	NA
scaffold-mi3	16401785	16402026	genic|scaffold-mi3:16401785-16402026	genic	42.6911	crovir-transcript-11384	16692399	119.045	0.84308	290494	0.002354	0.002354	0.001229	0.003583	0.152967	0.10325	0.153826	0.065211	NonVenom	NA
scaffold-mi3	16468548	16468981	intergenic|scaffold-mi3:16468548-16468981	intergenic	5.82432	crovir-transcript-11382	16470979	215.684	0.849517	2214.5	0.022685	0.022685	0.001229	0.023914	0.139285	0.055081	0.718932	0.132256	NonVenom	NA
scaffold-mi3	16472273	16472559	genic|scaffold-mi3:16472273-16472559	genic	6.23616	crovir-transcript-11382	16470979	215.684	0.849517	1437	0.066736	0.066736	0.001229	0.067965	0.423843	0.167611	0.769766	0.141608	NonVenom	NA
scaffold-mi3	16479921	16480255	genic|scaffold-mi3:16479921-16480255	genic	6.38604	crovir-transcript-11382	16470979	215.684	0.849517	9109	0.030406	0.030406	0.001229	0.031636	0.202026	0.079892	0.467813	0.08606	NonVenom	NA
scaffold-mi3	16485840	16486178	intergenic|scaffold-mi3:16485840-16486178	intergenic	6.40037	crovir-transcript-11382	16470979	215.684	0.849517	15030	0.041958	0.041958	0.001229	0.043187	0.276415	0.10931	0.303282	0.055792	NonVenom	NA
scaffold-mi3	16485840	16486178	intergenic|scaffold-mi3:16485840-16486178	intergenic	6.40037	crovir-transcript-11378	16498521	146.407	0.686099	12512	0.018459	0.018459	0.001229	0.019688	0.126012	0.089739	0.355731	0.099299	NonVenom	NA
scaffold-mi3	16503698	16503848	genic|scaffold-mi3:16503698-16503848	genic	1.00064	crovir-transcript-11378	16498521	146.407	0.686099	5252	0.166438	0.166438	0.001229	0.167668	0.167775	0.119479	0.118344	0.033035	NonVenom	NA
scaffold-mi3	16530898	16531676	intergenic|scaffold-mi3:16530898-16531676	intergenic	8.94238	crovir-transcript-11386	16541453	389.883	0.576486	10166	0.00913	0.00913	0.001229	0.01036	0.092639	0.095368	0.595411	0.204845	NonVenom	NA
scaffold-mi3	16620872	16621060	intergenic|scaffold-mi3:16620872-16621060	intergenic	1.27486	crovir-transcript-11394	16617620	144.789	0.587053	3346	0.104065	0.104065	0.001229	0.105294	0.134235	0.096144	0.157364	0.073437	NonVenom	NA
scaffold-mi3	16643218	16644014	genic|scaffold-mi3:16643218-16644014	genic	9.69708	crovir-transcript-11394	16617620	144.789	0.587053	25996	0.035064	0.035064	0.001229	0.036293	0.351939	0.252071	0.285285	0.133135	NonVenom	NA
scaffold-mi3	16643218	16644014	genic|scaffold-mi3:16643218-16644014	genic	9.69708	crovir-transcript-11384	16692399	119.045	0.84308	48783	0.010386	0.010386	0.001229	0.011615	0.112631	0.076024	0.164991	0.069945	NonVenom	NA
scaffold-mi3	16740095	16740510	genic|scaffold-mi3:16740095-16740510	genic	4.01573	crovir-transcript-11415	16759248	400.71	0.633995	18945.5	0.029596	0.029596	0.001229	0.030825	0.123787	0.085639	0.155573	0.083603	NonVenom	NA
scaffold-mi3	16760049	16760379	genic|scaffold-mi3:16760049-16760379	genic	1.33939	crovir-transcript-11415	16759248	400.71	0.633995	966	0.11919	0.11919	0.001229	0.120419	0.161288	0.111584	0.165329	0.088845	NonVenom	NA
scaffold-ma1	616925	617145	intergenic|scaffold-ma1:616925-617145	intergenic	1.07577	crovir-transcript-6714	614520	121.403	0.610433	2515	0.081718	0.081718	0.001229	0.082947	0.089232	0.117977	0.132789	0.079025	NonVenom	NA
scaffold-ma1	697504	698428	genic|scaffold-ma1:697504-698428	genic	33.3499	crovir-transcript-6707	329304	103.273	0.475436	368662	0	0	0.001229	0.001229	0.040994	0.058757	0.097667	0.075053	NonVenom	NA
scaffold-ma1	697504	698428	genic|scaffold-ma1:697504-698428	genic	33.3499	crovir-transcript-6714	614520	121.403	0.610433	83446	0.002045	0.002045	0.001229	0.003275	0.10921	0.14439	0.355704	0.211687	NonVenom	NA
scaffold-ma1	697504	698428	genic|scaffold-ma1:697504-698428	genic	33.3499	crovir-transcript-6685	1286167	402.734	0.95324	588201	0.00172	0.00172	0.001229	0.002949	0.098348	0.051694	0.065047	0.018055	NonVenom	NA
scaffold-ma1	2018380	2018552	intergenic|scaffold-ma1:2018380-2018552	intergenic	1.30468	crovir-transcript-6718	2022270	104.902	0.731584	3804	0.082287	0.082287	0.001229	0.083517	0.108962	0.076627	0.161044	0.083949	NonVenom	NA
scaffold-ma1	3460333	3461120	intergenic|scaffold-ma1:3460333-3461120	intergenic	16.1581	crovir-transcript-6776	3483380	127.321	0.653823	22653.5	0.003133	0.003133	0.001229	0.004362	0.070487	0.059329	0.53583	0.24055	NonVenom	NA
scaffold-ma1	4215127	4216130	intergenic|scaffold-ma1:4215127-4216130	intergenic	30.3837	crovir-transcript-6787	4189845	728.637	0.589421	25783.5	0.010743	0.010743	0.001229	0.011972	0.363753	0.226901	0.900285	0.358077	NonVenom	NA
scaffold-ma1	4774688	4775202	intergenic|scaffold-ma1:4774688-4775202	intergenic	5.42722	crovir-transcript-6754	4771818	164.34	0.1728	3127	0.114756	0.114756	0.001229	0.115985	0.629477	0.29363	0.669915	0.253384	NonVenom	NA
scaffold-ma1	8576614	8576997	intergenic|scaffold-ma1:8576614-8576997	intergenic	2.42935	crovir-transcript-6843	8570951	189.881	0.371592	5854.5	0.070167	0.070167	0.001229	0.071396	0.173447	0.088062	0.261416	0.059309	NonVenom	NA
scaffold-ma1	8577906	8578212	intergenic|scaffold-ma1:8577906-8578212	intergenic	7.75619	crovir-transcript-6843	8570951	189.881	0.371592	7108	0.070167	0.070167	0.001229	0.071396	0.553764	0.281157	0.705012	0.159952	NonVenom	NA
scaffold-ma1	13670164	13671265	intergenic|scaffold-ma1:13670164-13671265	intergenic	22.5071	crovir-transcript-6878	9679712	104.834	0.814842	3.991e+06	0.003986	0.003986	0.000369	0.004355	0.098021	0.063563	0.008299	0.00305	NonVenom	NA
scaffold-ma1	14745925	14746368	intergenic|scaffold-ma1:14745925-14746368	intergenic	4.08714	crovir-transcript-6969	14774319	124.261	0.886804	28172.5	0.017123	0.017123	0.001229	0.018352	0.075007	0.051105	0.112119	0.03662	NonVenom	NA
scaffold-ma1	14758950	14759451	intergenic|scaffold-ma1:14758950-14759451	intergenic	7.5198	crovir-transcript-6969	14774319	124.261	0.886804	15118.5	0.018409	0.018409	0.001229	0.019638	0.147676	0.100618	0.354511	0.115789	NonVenom	NA
scaffold-ma1	14764711	14764930	genic|scaffold-ma1:14764711-14764930	genic	2.6618	crovir-transcript-6969	14774319	124.261	0.886804	9498.5	0.032198	0.032198	0.001229	0.033428	0.088978	0.060624	0.188017	0.061409	NonVenom	NA
scaffold-ma1	14769441	14769810	genic|scaffold-ma1:14769441-14769810	genic	3.08453	crovir-transcript-6969	14774319	124.261	0.886804	4693.5	0.053074	0.053074	0.001229	0.054303	0.167499	0.114125	0.380743	0.124357	NonVenom	NA
scaffold-ma1	14779762	14780370	intergenic|scaffold-ma1:14779762-14780370	intergenic	6.31208	crovir-transcript-6969	14774319	124.261	0.886804	5747	0.010989	0.010989	0.001229	0.012218	0.077122	0.052546	0.690262	0.225451	NonVenom	NA
scaffold-ma1	16015593	16016040	intergenic|scaffold-ma1:16015593-16016040	intergenic	8.41423	crovir-transcript-6955	16024438	394.607	0.589178	8621.5	0.054472	0.054472	0.001229	0.055701	0.468683	0.311679	0.646599	0.314326	NonVenom	NA
scaffold-ma1	16019080	16019209	intergenic|scaffold-ma1:16019080-16019209	intergenic	1.72056	crovir-transcript-6955	16024438	394.607	0.589178	5293.5	0.054472	0.054472	0.001229	0.055701	0.095837	0.063733	0.202098	0.098244	NonVenom	NA
scaffold-ma1	16020710	16020909	intergenic|scaffold-ma1:16020710-16020909	intergenic	1.93305	crovir-transcript-6955	16024438	394.607	0.589178	3628.5	0.054472	0.054472	0.001229	0.055701	0.107673	0.071604	0.238608	0.115992	NonVenom	NA
scaffold-ma1	17367030	17367943	intergenic|scaffold-ma1:17367030-17367943	intergenic	16.5731	crovir-transcript-7000	17385946	228.198	0.563976	18459.5	0.005044	0.005044	0.001229	0.006273	0.103963	0.051283	0.656742	0.149337	NonVenom	NA
scaffold-ma1	17378520	17378971	intergenic|scaffold-ma1:17378520-17378971	intergenic	7.92258	crovir-transcript-7000	17385946	228.198	0.563976	7200.5	0.013491	0.013491	0.001229	0.01472	0.116623	0.057528	0.712082	0.161921	NonVenom	NA
scaffold-ma1	17387111	17387273	genic|scaffold-ma1:17387111-17387273	genic	1.11225	crovir-transcript-7000	17385946	228.198	0.563976	1246	0.109012	0.109012	0.001229	0.110242	0.122616	0.060484	0.137291	0.031219	NonVenom	NA
scaffold-ma1	17387409	17387802	genic|scaffold-ma1:17387409-17387802	genic	2.40383	crovir-transcript-7000	17385946	228.198	0.563976	1659.5	0.109012	0.109012	0.001229	0.110242	0.265002	0.13072	0.29672	0.067471	NonVenom	NA
scaffold-ma1	17405310	17406511	intergenic|scaffold-ma1:17405310-17406511	intergenic	43.5689	crovir-transcript-7000	17385946	228.198	0.563976	19964.5	0.013452	0.013452	0.001229	0.014682	0.639662	0.315531	1.6127	0.366713	NonVenom	NA
scaffold-ma1	23787578	23787957	genic|scaffold-ma1:23787578-23787957	genic	6.18668	crovir-transcript-7047	23795270	653.297	0.592518	7502.5	0.026484	0.026484	0.001229	0.027714	0.171455	0.110069	0.536537	0.149841	NonVenom	NA
scaffold-ma1	23789033	23789428	genic|scaffold-ma1:23789033-23789428	genic	11.5833	crovir-transcript-7047	23795270	653.297	0.592518	6039.5	0.026484	0.026484	0.001229	0.027714	0.321013	0.206081	1.21316	0.338805	NonVenom	NA
scaffold-ma1	23792735	23792980	genic|scaffold-ma1:23792735-23792980	genic	3.33962	crovir-transcript-7047	23795270	653.297	0.592518	2412.5	0.031457	0.031457	0.001229	0.032687	0.109161	0.070078	0.412229	0.115125	NonVenom	NA
scaffold-ma1	25024875	25025082	genic|scaffold-ma1:25024875-25025082	genic	5.03234	crovir-transcript-7085	25020745	279.567	0.245643	4233.5	0.053355	0.053355	0.001229	0.054584	0.274687	0.087866	0.621172	0.104142	NonVenom	NA
scaffold-ma1	25025261	25026252	genic|scaffold-ma1:25025261-25026252	genic	27.3502	crovir-transcript-7085	25020745	279.567	0.245643	5011.5	0.053355	0.053355	0.001229	0.054584	1.49289	0.477542	3.36926	0.564868	NonVenom	NA
scaffold-ma1	25026713	25027011	genic|scaffold-ma1:25026713-25027011	genic	5.08302	crovir-transcript-7085	25020745	279.567	0.245643	6117	0.053355	0.053355	0.001229	0.054584	0.277453	0.088751	0.526493	0.088268	NonVenom	NA
scaffold-ma1	32056675	32057097	intergenic|scaffold-ma1:32056675-32057097	intergenic	10.9027	crovir-transcript-7126	32051731	176.543	0.860813	5155	0.004325	0.004325	0.001229	0.005554	0.060555	0.082457	1.31052	0.476705	NonVenom	NA
scaffold-ma1	40539503	40540186	genic|scaffold-ma1:40539503-40540186	genic	22.5976	crovir-transcript-7192	40540870	171.924	0.598348	1025.5	0.059932	0.059932	0.001229	0.061161	1.3821	0.249458	2.78936	0.290977	NonVenom	NA
scaffold-ma1	40539503	40540186	genic|scaffold-ma1:40539503-40540186	genic	22.5976	crovir-transcript-7184	40592331	199.268	0.971762	52486.5	0.013844	0.013844	0.001229	0.015073	0.340616	0.066799	0.360773	0.053415	NonVenom	NA
scaffold-ma1	40542541	40543146	intergenic|scaffold-ma1:40542541-40543146	intergenic	19.8943	crovir-transcript-7192	40540870	171.924	0.598348	1973.5	0.064336	0.064336	0.001229	0.065565	1.30437	0.23543	2.45567	0.256168	NonVenom	NA
scaffold-ma1	40542541	40543146	intergenic|scaffold-ma1:40542541-40543146	intergenic	19.8943	crovir-transcript-7184	40592331	199.268	0.971762	49487.5	0.023106	0.023106	0.001229	0.024335	0.484133	0.094944	0.334296	0.049494	NonVenom	NA
scaffold-ma1	40555792	40556419	intergenic|scaffold-ma1:40555792-40556419	intergenic	16.5551	crovir-transcript-7192	40540870	171.924	0.598348	15235.5	0.033311	0.033311	0.001229	0.03454	0.571815	0.103208	0.775253	0.080872	NonVenom	NA
scaffold-ma1	40810361	40811309	intergenic|scaffold-ma1:40810361-40811309	intergenic	64.9402	crovir-transcript-7184	40592331	199.268	0.971762	218504	0.002758	0.002758	0.001229	0.003987	0.258911	0.050775	0.299781	0.044384	NonVenom	NA
scaffold-ma1	40810361	40811309	intergenic|scaffold-ma1:40810361-40811309	intergenic	64.9402	crovir-transcript-7264	43781776	220.835	0.877088	2970941	0.001102	0.001102	0.000477	0.001578	0.102496	0.054154	0.030954	0.007835	NonVenom	NA
scaffold-ma1	51774688	51775545	intergenic|scaffold-ma1:51774688-51775545	intergenic	9.93107	crovir-transcript-7364	51817736	218.2	0.842473	42619.5	0.005659	0.005659	0.001229	0.006888	0.068409	0.064574	0.190042	0.082759	NonVenom	NA
scaffold-ma1	52365027	52365352	intergenic|scaffold-ma1:52365027-52365352	intergenic	0.652338	crovir-transcript-7311	52361138	116.21	0.559726	4051.5	0.106809	0.106809	0.001229	0.108038	0.070477	0.079402	0.080522	0.090361	NonVenom	NA
scaffold-ma1	53760677	53761711	intergenic|scaffold-ma1:53760677-53761711	intergenic	29.9617	crovir-transcript-7352	53826401	107.219	0.892634	65207	0.010587	0.010587	0.001229	0.011816	0.354034	0.167212	0.396047	0.131192	NonVenom	NA
scaffold-ma1	53855295	53855978	intergenic|scaffold-ma1:53855295-53855978	intergenic	20.0126	crovir-transcript-7352	53826401	107.219	0.892634	29235.5	0.017656	0.017656	0.001229	0.018885	0.377937	0.178502	0.531581	0.176089	NonVenom	NA
scaffold-ma1	58019287	58019903	intergenic|scaffold-ma1:58019287-58019903	intergenic	16.4871	crovir-transcript-7462	58037218	112.236	0.398039	17623	0.008458	0.008458	0.001229	0.009687	0.159708	0.143834	0.680231	0.292166	NonVenom	NA
scaffold-ma1	58656553	58657602	intergenic|scaffold-ma1:58656553-58657602	intergenic	6.13297	crovir-transcript-7425	58659406	230.337	0.633084	2328.5	0.117607	0.117607	0.001229	0.118836	0.728819	0.165599	0.75703	0.159417	NonVenom	NA
scaffold-ma1	58656553	58657602	intergenic|scaffold-ma1:58656553-58657602	intergenic	6.13297	crovir-transcript-7431	58663608	322.787	0.92069	6530.5	0.117607	0.117607	0.001229	0.118836	0.728819	0.162638	0.600111	0.12932	NonVenom	NA
scaffold-ma1	60910611	60910832	intergenic|scaffold-ma1:60910611-60910832	intergenic	1.28929	crovir-transcript-7487	60905272	145.778	0.157284	5449.5	0.127676	0.127676	0.001229	0.128906	0.166197	0.106676	0.147663	0.079651	NonVenom	NA
scaffold-ma1	60913454	60913839	intergenic|scaffold-ma1:60913454-60913839	intergenic	4.03277	crovir-transcript-7487	60905272	145.778	0.157284	8374.5	0.127676	0.127676	0.001229	0.128906	0.519846	0.33367	0.317838	0.171444	NonVenom	NA
scaffold-ma1	61230375	61231000	genic|scaffold-ma1:61230375-61231000	genic	6.98322	crovir-transcript-7458	61238082	886.533	0.895306	7394.5	0.040683	0.040683	0.001229	0.041912	0.292684	0.175767	0.613303	0.195594	NonVenom	NA
scaffold-ma1	61542141	61542454	intergenic|scaffold-ma1:61542141-61542454	intergenic	5.265	crovir-transcript-7518	61553680	114.803	0.760794	11382.5	0.017847	0.017847	0.001229	0.019077	0.100438	0.072128	0.317731	0.102473	NonVenom	NA
scaffold-ma1	61544229	61544688	intergenic|scaffold-ma1:61544229-61544688	intergenic	8.64241	crovir-transcript-7518	61553680	114.803	0.760794	9221.5	0.017847	0.017847	0.001229	0.019077	0.164868	0.118397	0.62638	0.202017	NonVenom	NA
scaffold-ma1	61562716	61563306	genic|scaffold-ma1:61562716-61563306	genic	4.25112	crovir-transcript-7518	61553680	114.803	0.760794	9331	0.020022	0.020022	0.001229	0.021252	0.090343	0.064879	0.304963	0.098355	NonVenom	NA
scaffold-ma1	64872293	64873049	intergenic|scaffold-ma1:64872293-64873049	intergenic	11.4091	crovir-transcript-7475	64828867	152.19	0.172071	43804	0.011283	0.011283	0.001229	0.012512	0.142754	0.187022	0.21318	0.185459	NonVenom	NA
scaffold-ma1	65508553	65509179	intergenic|scaffold-ma1:65508553-65509179	intergenic	10.5362	crovir-transcript-7560	65479686	108.176	0.0426	29180	0.006485	0.006485	0.001229	0.007714	0.081278	0.11306	0.280329	0.216083	NonVenom	NA
scaffold-ma1	65811087	65811933	intergenic|scaffold-ma1:65811087-65811933	intergenic	7.24244	crovir-transcript-7560	65479686	108.176	0.0426	331824	0.006944	0.006944	0.001229	0.008173	0.059195	0.082342	0.023244	0.017917	NonVenom	NA
scaffold-ma1	70349447	70349765	intergenic|scaffold-ma1:70349447-70349765	intergenic	4.93281	crovir-transcript-7549	70386110	218.607	0.489585	36504	0.010516	0.010516	0.001229	0.011746	0.057938	0.050813	0.108011	0.048094	NonVenom	NA
scaffold-ma1	70388600	70388953	intergenic|scaffold-ma1:70388600-70388953	intergenic	1.63271	crovir-transcript-7549	70386110	218.607	0.489585	2666.5	0.040177	0.040177	0.001229	0.041407	0.067605	0.05929	0.201535	0.089736	NonVenom	NA
scaffold-ma1	70399290	70399716	intergenic|scaffold-ma1:70399290-70399716	intergenic	6.37276	crovir-transcript-7549	70386110	218.607	0.489585	13393	0.018877	0.018877	0.001229	0.020106	0.128133	0.112374	0.333839	0.148647	NonVenom	NA
scaffold-ma1	70399290	70399716	intergenic|scaffold-ma1:70399290-70399716	intergenic	6.37276	crovir-transcript-7566	70466211	109.004	0.624097	66708	0.010798	0.010798	0.001229	0.012027	0.076647	0.051664	0.082586	0.035546	NonVenom	NA
scaffold-ma1	70438800	70439359	intergenic|scaffold-ma1:70438800-70439359	intergenic	5.57019	crovir-transcript-7549	70386110	218.607	0.489585	52969.5	0.016624	0.016624	0.001229	0.017853	0.099447	0.087216	0.088223	0.039283	NonVenom	NA
scaffold-ma1	70438800	70439359	intergenic|scaffold-ma1:70438800-70439359	intergenic	5.57019	crovir-transcript-7566	70466211	109.004	0.624097	27131.5	0.01849	0.01849	0.001229	0.01972	0.109842	0.074039	0.15789	0.067957	NonVenom	NA
scaffold-ma1	70466955	70467455	genic|scaffold-ma1:70466955-70467455	genic	8.27614	crovir-transcript-7549	70386110	218.607	0.489585	81095	0.010032	0.010032	0.001229	0.011262	0.093203	0.08174	0.090494	0.040294	NonVenom	NA
scaffold-ma1	70466955	70467455	genic|scaffold-ma1:70466955-70467455	genic	8.27614	crovir-transcript-7566	70466211	109.004	0.624097	994	0.069891	0.069891	0.001229	0.071121	0.588604	0.396746	1.02157	0.439695	NonVenom	NA
scaffold-ma1	81175726	81176046	intergenic|scaffold-ma1:81175726-81176046	intergenic	1.62223	crovir-transcript-7673	81170359	288.882	0.93988	5527	0.054243	0.054243	0.001229	0.055472	0.089989	0.055301	0.183527	0.069928	NonVenom	NA
scaffold-ma1	81191296	81191528	intergenic|scaffold-ma1:81191296-81191528	intergenic	3.30066	crovir-transcript-7673	81170359	288.882	0.93988	21053	0.058981	0.058981	0.001229	0.06021	0.198734	0.122129	0.11666	0.04445	NonVenom	NA
scaffold-ma1	82442866	82443581	intergenic|scaffold-ma1:82442866-82443581	intergenic	10.5318	crovir-transcript-7655	82611810	126.84	0.562944	168586	0.010869	0.010869	0.001229	0.012098	0.127414	0.060237	0.060924	0.018949	NonVenom	NA
scaffold-ma1	82613482	82614100	intergenic|scaffold-ma1:82613482-82614100	intergenic	15.4948	crovir-transcript-7655	82611810	126.84	0.562944	1981	0.079481	0.079481	0.001229	0.080711	1.2506	0.591235	1.91262	0.59487	NonVenom	NA
scaffold-ma1	85722422	85722829	intergenic|scaffold-ma1:85722422-85722829	intergenic	4.36585	crovir-transcript-7678	85732257	193.998	0.570049	9631.5	0.021751	0.021751	0.001229	0.022981	0.10033	0.115713	0.304675	0.192639	NonVenom	NA
scaffold-ma1	85727704	85727919	intergenic|scaffold-ma1:85727704-85727919	intergenic	2.00635	crovir-transcript-7678	85732257	193.998	0.570049	4445.5	0.028547	0.028547	0.001229	0.029776	0.059741	0.068901	0.247656	0.156587	NonVenom	NA
scaffold-ma1	88307399	88307802	genic|scaffold-ma1:88307399-88307802	genic	5.94799	crovir-transcript-7747	88315731	438.842	0.919232	8130.5	0.030834	0.030834	0.001229	0.032063	0.190709	0.06425	0.480998	0.097807	NonVenom	NA
scaffold-ma1	88318792	88319159	genic|scaffold-ma1:88318792-88319159	genic	6.16354	crovir-transcript-7747	88315731	438.842	0.919232	3244.5	0.082594	0.082594	0.001229	0.083823	0.516647	0.174059	0.760803	0.154703	NonVenom	NA
scaffold-ma1	88343974	88344576	genic|scaffold-ma1:88343974-88344576	genic	8.98968	crovir-transcript-7751	88373685	821.97	0.553288	29410	0.007628	0.007628	0.001229	0.008858	0.079627	0.059865	0.237554	0.119654	NonVenom	NA
scaffold-ma1	89224097	89224321	intergenic|scaffold-ma1:89224097-89224321	intergenic	2.07226	crovir-transcript-7759	89213084	1502.89	0.653246	11125	0.042223	0.042223	0.001229	0.043452	0.090044	0.061649	0.127571	0.04582	NonVenom	NA
scaffold-ma1	89231371	89232257	intergenic|scaffold-ma1:89231371-89232257	intergenic	23.1668	crovir-transcript-7678	85732257	193.998	0.570049	3499557	0.001721	0.001721	0.000413	0.002134	0.049441	0.057022	0.009576	0.006055	NonVenom	NA
scaffold-ma1	89231371	89232257	intergenic|scaffold-ma1:89231371-89232257	intergenic	23.1668	crovir-transcript-7759	89213084	1502.89	0.653246	18730	0.01767	0.01767	0.001229	0.018899	0.437827	0.299758	0.906481	0.325587	NonVenom	NA
scaffold-ma1	89231371	89232257	intergenic|scaffold-ma1:89231371-89232257	intergenic	23.1668	crovir-transcript-7755	89320667	3583.55	0.582923	88853	0.002452	0.002452	0.001229	0.003681	0.085284	0.0929	0.233958	0.144161	NonVenom	NA
scaffold-ma1	89327987	89328593	intergenic|scaffold-ma1:89327987-89328593	intergenic	1.44555	crovir-transcript-7755	89320667	3583.55	0.582923	7623	0.035229	0.035229	0.001229	0.036458	0.052703	0.057409	0.123639	0.076185	NonVenom	NA
scaffold-ma1	90750033	90750517	intergenic|scaffold-ma1:90750033-90750517	intergenic	3.57757	crovir-transcript-7737	90765521	183.567	0.695087	15246	0.019231	0.019231	0.001229	0.02046	0.073198	0.060449	0.167432	0.074801	NonVenom	NA
scaffold-ma1	90763873	90764074	intergenic|scaffold-ma1:90763873-90764074	intergenic	2.16498	crovir-transcript-7737	90765521	183.567	0.695087	1547.5	0.057438	0.057438	0.001229	0.058667	0.127014	0.104892	0.267237	0.119389	NonVenom	NA
scaffold-ma1	90784730	90784905	genic|scaffold-ma1:90784730-90784905	genic	1.8281	crovir-transcript-7738	90782999	239.17	0.228578	1818.5	0.066879	0.066879	0.001229	0.068108	0.124508	0.094226	0.225654	0.102308	NonVenom	NA
scaffold-ma1	90820213	90821331	intergenic|scaffold-ma1:90820213-90821331	intergenic	18.6118	crovir-transcript-7750	88216402	108.436	0.588267	2604370	0.003002	0.003002	0.000535	0.003536	0.065815	0.07839	0.009948	0.005085	NonVenom	NA
scaffold-ma1	90820213	90821331	intergenic|scaffold-ma1:90820213-90821331	intergenic	18.6118	crovir-transcript-7755	89320667	3583.55	0.582923	1500105	0.002008	0.002008	0.000864	0.002872	0.053444	0.058217	0.016076	0.009906	NonVenom	NA
scaffold-ma1	90820213	90821331	intergenic|scaffold-ma1:90820213-90821331	intergenic	18.6118	crovir-transcript-7737	90765521	183.567	0.695087	55251	0.005245	0.005245	0.001229	0.006474	0.120502	0.099514	0.284163	0.126951	NonVenom	NA
scaffold-ma1	90820213	90821331	intergenic|scaffold-ma1:90820213-90821331	intergenic	18.6118	crovir-transcript-7738	90782999	239.17	0.228578	37773	0.013479	0.013479	0.001229	0.014708	0.273746	0.207168	0.395596	0.179357	NonVenom	NA
scaffold-ma1	90836136	90836429	intergenic|scaffold-ma1:90836136-90836429	intergenic	6.39303	crovir-transcript-7739	90862118	791.293	0.556628	25835.5	0.02151	0.02151	0.001229	0.022739	0.145373	0.072462	0.189097	0.05574	NonVenom	NA
scaffold-ma1	90855411	90855740	intergenic|scaffold-ma1:90855411-90855740	intergenic	1.60876	crovir-transcript-7739	90862118	791.293	0.556628	6542.5	0.067145	0.067145	0.001229	0.068375	0.109998	0.054829	0.157165	0.046328	NonVenom	NA
scaffold-ma1	90870657	90871605	genic|scaffold-ma1:90870657-90871605	genic	11.1957	crovir-transcript-7739	90862118	791.293	0.556628	9013	0.036352	0.036352	0.001229	0.037581	0.420746	0.209723	0.827739	0.243993	NonVenom	NA
scaffold-ma1	90872924	90873174	intergenic|scaffold-ma1:90872924-90873174	intergenic	3.8006	crovir-transcript-7739	90862118	791.293	0.556628	10931	0.036352	0.036352	0.001229	0.037581	0.142831	0.071195	0.237577	0.070031	NonVenom	NA
scaffold-ma1	90874448	90874595	intergenic|scaffold-ma1:90874448-90874595	intergenic	2.82524	crovir-transcript-7739	90862118	791.293	0.556628	12403.5	0.036352	0.036352	0.001229	0.037581	0.106176	0.052924	0.15822	0.046639	NonVenom	NA
scaffold-ma1	91216547	91216821	genic|scaffold-ma1:91216547-91216821	genic	2.05847	crovir-transcript-7769	91223619	927.694	0.886257	6935	0.050897	0.050897	0.001229	0.052126	0.1073	0.073859	0.191162	0.071193	NonVenom	NA
scaffold-ma1	91257023	91257161	genic|scaffold-ma1:91257023-91257161	genic	3.32077	crovir-transcript-7766	91257769	162.386	0.934111	677	0.059981	0.059981	0.001229	0.06121	0.203265	0.126265	0.409903	0.142192	NonVenom	NA
scaffold-ma1	92319946	92320365	intergenic|scaffold-ma1:92319946-92320365	intergenic	4.13593	crovir-transcript-7802	92331612	1018.17	0.406389	11456.5	0.020487	0.020487	0.001229	0.021716	0.089815	0.05927	0.248191	0.128993	NonVenom	NA
scaffold-ma1	92332356	92332743	intergenic|scaffold-ma1:92332356-92332743	intergenic	4.46879	crovir-transcript-7802	92331612	1018.17	0.406389	937.5	0.091227	0.091227	0.001229	0.092456	0.413169	0.272657	0.55161	0.28669	NonVenom	NA
scaffold-ma1	92765335	92765531	intergenic|scaffold-ma1:92765335-92765531	intergenic	3.43304	crovir-transcript-7795	92764642	755.584	0.98828	791	0.086325	0.086325	0.001229	0.087554	0.300577	0.075807	0.42376	0.056629	NonVenom	NA
scaffold-ma1	92765844	92766267	intergenic|scaffold-ma1:92765844-92766267	intergenic	6.76665	crovir-transcript-7795	92764642	755.584	0.98828	1413.5	0.086325	0.086325	0.001229	0.087554	0.592449	0.149419	0.835249	0.111617	NonVenom	NA
scaffold-ma1	94596425	94596871	genic|scaffold-ma1:94596425-94596871	genic	10.9836	crovir-transcript-7817	94599998	1404.82	0.622943	3350	0.107098	0.107098	0.001229	0.108328	1.18982	0.433493	1.35577	0.373594	NonVenom	NA
scaffold-ma1	94598897	94599215	genic|scaffold-ma1:94598897-94599215	genic	2.59408	crovir-transcript-7817	94599998	1404.82	0.622943	942	0.107098	0.107098	0.001229	0.108328	0.281011	0.102382	0.320203	0.088235	NonVenom	NA
scaffold-ma1	94756614	94757067	genic|scaffold-ma1:94756614-94757067	genic	2.27081	crovir-transcript-7819	94759781	261.134	0.826744	2940.5	0.07481	0.07481	0.001229	0.076039	0.17267	0.104984	0.2803	0.101101	NonVenom	NA
scaffold-ma1	97159776	97160442	genic|scaffold-ma1:97159776-97160442	genic	10.377	crovir-transcript-7852	97162157	105.399	0.704804	2048	0.077771	0.077771	0.001229	0.079	0.819789	0.472984	1.2809	0.519537	NonVenom	NA
scaffold-ma1	99555610	99555870	genic|scaffold-ma1:99555610-99555870	genic	2.64799	crovir-transcript-7867	99558255	118.1	0.50665	2515	0.032137	0.032137	0.001229	0.033366	0.088353	0.058822	0.326858	0.108635	NonVenom	NA
scaffold-ma1	100412148	100412819	intergenic|scaffold-ma1:100412148-100412819	intergenic	31.8539	crovir-transcript-7867	99558255	118.1	0.50665	854228	0.001509	0.001509	0.001229	0.002738	0.087229	0.058074	0.044907	0.014925	NonVenom	NA
scaffold-ma1	100580127	100580310	genic|scaffold-ma1:100580127-100580310	genic	1.77146	crovir-transcript-7909	100578010	143.129	0.851764	2208.5	0.07174	0.07174	0.001229	0.072969	0.129262	0.060103	0.218662	0.073885	NonVenom	NA
scaffold-ma1	104063818	104064173	genic|scaffold-ma1:104063818-104064173	genic	2.65237	crovir-transcript-7971	104058119	162.278	0.962045	5876.5	0.07795	0.07795	0.001229	0.079179	0.210012	0.076639	0.284485	0.081662	NonVenom	NA
scaffold-ma1	104502570	104503250	intergenic|scaffold-ma1:104502570-104503250	intergenic	6.13419	crovir-transcript-8005	104443685	115.156	0.50164	59225	0.009247	0.009247	0.001229	0.010476	0.06426	0.062238	0.088164	0.062093	NonVenom	NA
scaffold-ma1	104502570	104503250	intergenic|scaffold-ma1:104502570-104503250	intergenic	6.13419	crovir-transcript-8006	104496224	109.073	0.376814	6686	0.053715	0.053715	0.001229	0.054944	0.337038	0.272394	0.588067	0.317466	NonVenom	NA
scaffold-ma1	105982913	105983575	intergenic|scaffold-ma1:105982913-105983575	intergenic	11.1094	crovir-transcript-8054	105970617	222.97	0.417927	12627	0.008171	0.008171	0.001229	0.0094	0.10443	0.120812	0.612561	0.316749	NonVenom	NA
scaffold-ma1	106167128	106167657	intergenic|scaffold-ma1:106167128-106167657	intergenic	6.14715	crovir-transcript-8054	105970617	222.97	0.417927	196776	0.009771	0.009771	0.001229	0.011	0.067619	0.078227	0.031084	0.016073	NonVenom	NA
scaffold-ma1	107333619	107333968	intergenic|scaffold-ma1:107333619-107333968	intergenic	1.97693	crovir-transcript-8058	107332386	810.981	0.591729	1407.5	0.106204	0.106204	0.001229	0.107434	0.212389	0.273646	0.244025	0.285783	NonVenom	NA
scaffold-ma1	114560997	114561555	genic|scaffold-ma1:114560997-114561555	genic	4.28821	crovir-transcript-8177	114566838	274.589	0.906905	5562	0.075302	0.075302	0.001229	0.076532	0.328184	0.136431	0.482479	0.12607	NonVenom	NA
scaffold-ma1	114573449	114574018	genic|scaffold-ma1:114573449-114574018	genic	9.62408	crovir-transcript-8177	114566838	274.589	0.906905	6895.5	0.066175	0.066175	0.001229	0.067404	0.6487	0.269675	0.898201	0.234697	NonVenom	NA
scaffold-ma1	118425889	118426315	genic|scaffold-ma1:118425889-118426315	genic	6.40162	crovir-transcript-8202	118641553	131.169	0.191261	215451	0.003332	0.003332	0.001229	0.004561	0.029197	0.056325	0.029915	0.024375	NonVenom	NA
scaffold-ma1	118502637	118503554	intergenic|scaffold-ma1:118502637-118503554	intergenic	19.4979	crovir-transcript-8202	118641553	131.169	0.191261	138458	0.001629	0.001629	0.001229	0.002858	0.055732	0.107513	0.133863	0.109073	NonVenom	NA
scaffold-ma1	118634465	118635133	intergenic|scaffold-ma1:118634465-118635133	intergenic	3.92139	crovir-transcript-8202	118641553	131.169	0.191261	6754	0.00644	0.00644	0.001229	0.007669	0.030073	0.058013	0.372638	0.303629	NonVenom	NA
scaffold-ma1	128521635	128522604	intergenic|scaffold-ma1:128521635-128522604	intergenic	31.5875	crovir-transcript-8197	128518334	263.921	0.682091	3785.5	0.021703	0.021703	0.001229	0.022932	0.724376	0.332766	3.89904	0.432235	NonVenom	NA
scaffold-ma1	128522779	128523383	intergenic|scaffold-ma1:128522779-128523383	intergenic	17.2578	crovir-transcript-8197	128518334	263.921	0.682091	4747	0.021703	0.021703	0.001229	0.022932	0.395762	0.181806	2.13024	0.236152	NonVenom	NA
scaffold-ma1	128530185	128531509	intergenic|scaffold-ma1:128530185-128531509	intergenic	38.5553	crovir-transcript-8197	128518334	263.921	0.682091	12513	0.01229	0.01229	0.001229	0.013519	0.521243	0.23945	2.14275	0.237539	NonVenom	NA
scaffold-ma1	130974509	130975236	intergenic|scaffold-ma1:130974509-130975236	intergenic	18.1196	crovir-transcript-8214	131105995	141.294	0.960102	131122	0.005229	0.005229	0.001229	0.006459	0.117025	0.093764	0.130433	0.050919	NonVenom	NA
scaffold-ma1	131016938	131017635	intergenic|scaffold-ma1:131016938-131017635	intergenic	5.11443	crovir-transcript-8214	131105995	141.294	0.960102	88708.5	0.014561	0.014561	0.001229	0.01579	0.080759	0.064707	0.051723	0.020192	NonVenom	NA
scaffold-ma1	136340143	136340363	genic|scaffold-ma1:136340143-136340363	genic	2.08778	crovir-transcript-8279	136338193	238.407	0.988644	2060	0.079271	0.079271	0.001229	0.080501	0.168068	0.066269	0.257708	0.073939	NonVenom	NA
scaffold-ma1	136496574	136497422	intergenic|scaffold-ma1:136496574-136497422	intergenic	23.7403	crovir-transcript-8279	136338193	238.407	0.988644	158805	0.008663	0.008663	0.001229	0.009892	0.234845	0.092599	0.144662	0.041505	NonVenom	NA
scaffold-ma1	138510870	138511573	intergenic|scaffold-ma1:138510870-138511573	intergenic	13.0281	crovir-transcript-8313	138509247	860.883	0.399253	1974.5	0.025834	0.025834	0.001229	0.027063	0.35258	0.423378	1.60813	0.754617	NonVenom	NA
scaffold-ma1	139738492	139739551	intergenic|scaffold-ma1:139738492-139739551	intergenic	25.1117	crovir-transcript-8293	139742490	164.922	0.515212	3468.5	0.126042	0.126042	0.001229	0.127271	3.19599	0.834959	3.09968	0.800695	NonVenom	NA
scaffold-ma1	143937241	143938120	intergenic|scaffold-ma1:143937241-143938120	intergenic	88.8931	crovir-transcript-8317	141702308	102.289	0.416075	2.23537e+06	0	0	0.000611	0.000611	0.054269	0.083744	0.054269	0.05641	NonVenom	NA
scaffold-ma1	143937241	143938120	intergenic|scaffold-ma1:143937241-143938120	intergenic	88.8931	crovir-transcript-8385	142369566	163.868	0.818243	1.56811e+06	0	0	0.000831	0.000831	0.073877	0.079778	0.073877	0.043384	NonVenom	NA
scaffold-ma1	143937241	143938120	intergenic|scaffold-ma1:143937241-143938120	intergenic	88.8931	crovir-transcript-8362	145715625	148.685	0.555626	1.77794e+06	0	0	0.000745	0.000745	0.066231	0.110958	0.066231	0.063372	NonVenom	NA
scaffold-ma1	145650631	145650870	intergenic|scaffold-ma1:145650631-145650870	intergenic	2.99829	crovir-transcript-8362	145715625	148.685	0.555626	64874.5	0.010772	0.010772	0.001229	0.012002	0.035984	0.060285	0.039809	0.038091	NonVenom	NA
scaffold-ma1	145650929	145651242	intergenic|scaffold-ma1:145650929-145651242	intergenic	3.59002	crovir-transcript-8362	145715625	148.685	0.555626	64539.5	0.010772	0.010772	0.001229	0.012002	0.043086	0.072183	0.047881	0.045814	NonVenom	NA
scaffold-ma1	147381976	147382380	intergenic|scaffold-ma1:147381976-147382380	intergenic	4.65266	crovir-transcript-8377	147394961	103.755	0.553349	12783	0.023236	0.023236	0.001229	0.024465	0.113828	0.109432	0.253818	0.11719	NonVenom	NA
scaffold-ma1	147386679	147386818	intergenic|scaffold-ma1:147386679-147386818	intergenic	2.02345	crovir-transcript-8377	147394961	103.755	0.553349	8212.5	0.03433	0.03433	0.001229	0.03556	0.071953	0.069175	0.162209	0.074893	NonVenom	NA
scaffold-ma1	147389776	147389973	intergenic|scaffold-ma1:147389776-147389973	intergenic	3.90122	crovir-transcript-8377	147394961	103.755	0.553349	5086.5	0.03433	0.03433	0.001229	0.03556	0.138726	0.133368	0.474419	0.219044	NonVenom	NA
scaffold-ma1	147412843	147413772	intergenic|scaffold-ma1:147412843-147413772	intergenic	8.96142	crovir-transcript-8377	147394961	103.755	0.553349	18346.5	0.015059	0.015059	0.001229	0.016288	0.145965	0.140328	0.357015	0.164837	NonVenom	NA
scaffold-ma1	151677565	151678326	genic|scaffold-ma1:151677565-151678326	genic	12.6612	crovir-transcript-8449	151703994	156.905	0.746463	26048.5	0.013369	0.013369	0.001229	0.014598	0.184827	0.062927	0.371834	0.103317	NonVenom	NA
scaffold-ma1	152518548	152519169	intergenic|scaffold-ma1:152518548-152519169	intergenic	15.8924	crovir-transcript-8475	152742669	138.593	0.880306	223810	0.008173	0.008173	0.001229	0.009402	0.149426	0.09739	0.071848	0.031446	NonVenom	NA
scaffold-ma1	152582822	152583288	intergenic|scaffold-ma1:152582822-152583288	intergenic	7.78618	crovir-transcript-8475	152742669	138.593	0.880306	159614	0.008955	0.008955	0.001229	0.010184	0.079292	0.05168	0.047236	0.020674	NonVenom	NA
scaffold-ma1	154704527	154705250	intergenic|scaffold-ma1:154704527-154705250	intergenic	15.3343	crovir-transcript-8463	154762865	121.143	0.261614	57976.5	0.011357	0.011357	0.001229	0.012586	0.192994	0.208844	0.224517	0.109713	NonVenom	NA
scaffold-ma1	154704527	154705250	intergenic|scaffold-ma1:154704527-154705250	intergenic	15.3343	crovir-transcript-8460	154768203	912.928	0.942612	63314.5	0.006943	0.006943	0.001229	0.008172	0.125316	0.100137	0.207955	0.098742	NonVenom	NA
scaffold-ma1	154816711	154817459	intergenic|scaffold-ma1:154816711-154817459	intergenic	9.71338	crovir-transcript-8460	154768203	912.928	0.942612	48882	0.016558	0.016558	0.001229	0.017787	0.172774	0.138059	0.164977	0.078335	NonVenom	NA
scaffold-ma1	155432200	155432558	intergenic|scaffold-ma1:155432200-155432558	intergenic	5.51294	crovir-transcript-8495	155431008	181.343	0.992045	1371	0.046438	0.046438	0.001229	0.047667	0.262785	0.132943	0.680496	0.168389	NonVenom	NA
scaffold-ma1	160708341	160708958	intergenic|scaffold-ma1:160708341-160708958	intergenic	20.3436	crovir-transcript-8549	160675081	332.535	0.360387	33568.5	0.028693	0.028693	0.001229	0.029922	0.608719	0.334014	0.479157	0.265293	NonVenom	NA
scaffold-ma1	160708341	160708958	intergenic|scaffold-ma1:160708341-160708958	intergenic	20.3436	crovir-transcript-8553	160706679	447.444	0.625129	1970.5	0.136223	0.136223	0.001229	0.137452	2.79627	0.67067	2.51114	0.595301	NonVenom	NA
scaffold-ma1	160708341	160708958	intergenic|scaffold-ma1:160708341-160708958	intergenic	20.3436	crovir-transcript-8547	160712434	447.559	0.726969	3784.5	0.136223	0.136223	0.001229	0.137452	2.79627	0.774772	2.51114	0.573711	NonVenom	NA
scaffold-ma1	169417465	169417784	intergenic|scaffold-ma1:169417465-169417784	intergenic	3.11042	crovir-transcript-8573	169423774	9464.37	0.73541	6149.5	0.047429	0.047429	0.001229	0.048658	0.151346	0.124511	0.320692	0.200192	Venom	PER1_cvt8573-CRISP_1
scaffold-ma1	169556765	169557721	intergenic|scaffold-ma1:169556765-169557721	intergenic	37.5338	crovir-transcript-8573	169423774	9464.37	0.73541	133469	0.005805	0.005805	0.001229	0.007034	0.264019	0.217207	0.266048	0.166081	Venom	PER2_cvt8573-CRISP_1
scaffold-ma1	169556765	169557721	intergenic|scaffold-ma1:169556765-169557721	intergenic	37.5338	crovir-transcript-8572	169434958	3671.93	0.488249	122285	0	0	0.001229	0.001229	0.046136	0.06416	0.287095	0.203749	NonVenom	PER2_cvt8573-CRISP_1
scaffold-ma1	169556765	169557721	intergenic|scaffold-ma1:169556765-169557721	intergenic	37.5338	crovir-transcript-8578	169537709	188.892	0.784721	19534	0.001603	0.001603	0.001229	0.002832	0.106292	0.075661	1.41591	0.352329	NonVenom	PER2_cvt8573-CRISP_1
scaffold-ma1	169696262	169697612	intergenic|scaffold-ma1:169696262-169697612	intergenic	12.3791	crovir-transcript-8572	169434958	3671.93	0.488249	261979	0.003743	0.003743	0.001229	0.004972	0.061546	0.08559	0.0488	0.034633	NonVenom	NA
scaffold-ma1	169696262	169697612	intergenic|scaffold-ma1:169696262-169697612	intergenic	12.3791	crovir-transcript-8578	169537709	188.892	0.784721	159228	0.00889	0.00889	0.001229	0.010119	0.12527	0.08917	0.075258	0.018727	NonVenom	NA
scaffold-ma1	170373150	170373768	intergenic|scaffold-ma1:170373150-170373768	intergenic	14.1552	crovir-transcript-8620	170295660	179.234	0.902654	77799	0.006578	0.006578	0.001229	0.007807	0.110515	0.084858	0.160467	0.073435	NonVenom	NA
scaffold-ma1	170441480	170441986	intergenic|scaffold-ma1:170441480-170441986	intergenic	13.2464	crovir-transcript-8620	170295660	179.234	0.902654	146073	0.008529	0.008529	0.001229	0.009758	0.12926	0.099251	0.086804	0.039724	NonVenom	NA
scaffold-ma1	171405090	171405605	intergenic|scaffold-ma1:171405090-171405605	intergenic	7.47322	crovir-transcript-8602	171404035	194.036	0.540111	1312.5	0.05998	0.05998	0.001229	0.06121	0.457433	0.444929	0.922465	0.422366	NonVenom	NA
scaffold-ma1	175198517	175198771	genic|scaffold-ma1:175198517-175198771	genic	3.21886	crovir-transcript-8646	175196576	518.387	0.98166	2068	0.080114	0.080114	0.001229	0.081343	0.261832	0.133334	0.397324	0.145124	NonVenom	NA
scaffold-ma1	178507210	178507398	genic|scaffold-ma1:178507210-178507398	genic	3.18373	crovir-transcript-8658	178506236	577.726	0.926277	1068	0.082981	0.082981	0.001229	0.084211	0.268104	0.109116	0.392988	0.121378	NonVenom	NA
scaffold-ma1	178508722	178508984	genic|scaffold-ma1:178508722-178508984	genic	3.1917	crovir-transcript-8658	178506236	577.726	0.926277	2617	0.082981	0.082981	0.001229	0.084211	0.268775	0.109389	0.393971	0.121681	NonVenom	NA
scaffold-ma1	179080252	179080985	intergenic|scaffold-ma1:179080252-179080985	intergenic	18.7914	crovir-transcript-8686	179119157	260.594	0.840104	38538.5	0.009669	0.009669	0.001229	0.010898	0.204786	0.111965	0.392503	0.124586	NonVenom	NA
scaffold-ma1	179080252	179080985	intergenic|scaffold-ma1:179080252-179080985	intergenic	18.7914	crovir-transcript-8687	179161557	377.874	0.341653	80938.5	0.00218	0.00218	0.001229	0.003409	0.064069	0.05254	0.205817	0.090731	NonVenom	NA
scaffold-ma1	179120132	179120415	intergenic|scaffold-ma1:179120132-179120415	intergenic	3.95111	crovir-transcript-8687	179161557	377.874	0.341653	41283.5	0.030178	0.030178	0.001229	0.031407	0.124093	0.101765	0.077733	0.034267	NonVenom	NA
scaffold-ma1	179146286	179147081	genic|scaffold-ma1:179146286-179147081	genic	16.4202	crovir-transcript-8686	179119157	260.594	0.840104	27526.5	0.010978	0.010978	0.001229	0.012207	0.200437	0.109588	0.459623	0.14589	NonVenom	NA
scaffold-ma1	179146286	179147081	genic|scaffold-ma1:179146286-179147081	genic	16.4202	crovir-transcript-8687	179161557	377.874	0.341653	14873.5	0.009283	0.009283	0.001229	0.010512	0.172609	0.141551	0.785189	0.346139	NonVenom	NA
scaffold-ma1	179616570	179617337	intergenic|scaffold-ma1:179616570-179617337	intergenic	23.5757	crovir-transcript-8735	179746065	737.732	0.497905	129112	0.009691	0.009691	0.001229	0.01092	0.257447	0.118977	0.172006	0.053417	NonVenom	NA
scaffold-ma1	179753467	179754152	intergenic|scaffold-ma1:179753467-179754152	intergenic	15.9325	crovir-transcript-8735	179746065	737.732	0.497905	7744.5	0.054837	0.054837	0.001229	0.056066	0.893275	0.41282	1.3441	0.41741	NonVenom	NA
scaffold-ma1	179758256	179758902	intergenic|scaffold-ma1:179758256-179758902	intergenic	10.6545	crovir-transcript-8735	179746065	737.732	0.497905	12514	0.009114	0.009114	0.001229	0.010343	0.110204	0.05093	0.592095	0.183875	NonVenom	NA
scaffold-ma1	180295850	180296015	genic|scaffold-ma1:180295850-180296015	genic	5.46629	crovir-transcript-8760	180297782	1089.21	0.999939	1849.5	0.052352	0.052352	0.001229	0.053581	0.292891	0.057553	0.674737	0.071291	NonVenom	NA
scaffold-ma1	180328265	180328858	intergenic|scaffold-ma1:180328265-180328858	intergenic	11.4703	crovir-transcript-8760	180297782	1089.21	0.999939	30779.5	0.030916	0.030916	0.001229	0.032145	0.368714	0.072452	0.291338	0.030782	NonVenom	NA
scaffold-ma1	180393513	180394401	intergenic|scaffold-ma1:180393513-180394401	intergenic	21.4675	crovir-transcript-8758	180405494	199.15	0.83051	11537	0.013822	0.013822	0.001229	0.015051	0.323115	0.063838	1.28041	0.146775	NonVenom	NA
scaffold-ma1	180402569	180403005	intergenic|scaffold-ma1:180402569-180403005	intergenic	7.67388	crovir-transcript-8758	180405494	199.15	0.83051	2707	0.12829	0.12829	0.001229	0.129519	0.993915	0.196368	0.947233	0.108582	NonVenom	NA
scaffold-ma1	180409755	180410021	genic|scaffold-ma1:180409755-180410021	genic	4.07345	crovir-transcript-8758	180405494	199.15	0.83051	4394	0.12829	0.12829	0.001229	0.129519	0.52759	0.104236	0.50281	0.057638	NonVenom	NA
scaffold-ma1	180411110	180411374	genic|scaffold-ma1:180411110-180411374	genic	8.20281	crovir-transcript-8758	180405494	199.15	0.83051	5748	0.045364	0.045364	0.001229	0.046593	0.382194	0.07551	0.896889	0.102811	NonVenom	NA
scaffold-ma1	180411898	180412255	genic|scaffold-ma1:180411898-180412255	genic	8.64296	crovir-transcript-8758	180405494	199.15	0.83051	6582.5	0.045364	0.045364	0.001229	0.046593	0.402702	0.079562	0.839897	0.096278	NonVenom	NA
scaffold-ma1	180414725	180415040	genic|scaffold-ma1:180414725-180415040	genic	5.71406	crovir-transcript-8758	180405494	199.15	0.83051	9388.5	0.045364	0.045364	0.001229	0.046593	0.266236	0.0526	0.407725	0.046738	NonVenom	NA
scaffold-ma1	180455854	180456650	intergenic|scaffold-ma1:180455854-180456650	intergenic	13.9182	crovir-transcript-8758	180405494	199.15	0.83051	50758	0.029657	0.029657	0.001229	0.030886	0.429879	0.084931	0.228775	0.026225	NonVenom	NA
scaffold-ma1	181066860	181067315	genic|scaffold-ma1:181066860-181067315	genic	2.89638	crovir-transcript-8709	181063718	388.569	0.885772	3369.5	0.056388	0.056388	0.001229	0.057617	0.166881	0.080416	0.357517	0.09646	NonVenom	NA
scaffold-ma1	181103346	181103590	genic|scaffold-ma1:181103346-181103590	genic	3.08089	crovir-transcript-8713	181106427	5592.21	0.990648	2959	0.066303	0.066303	0.001229	0.067532	0.208058	0.068296	0.380292	0.088137	NonVenom	NA
scaffold-ma1	185467124	185467505	intergenic|scaffold-ma1:185467124-185467505	intergenic	1.97941	crovir-transcript-8779	185473146	1327.23	0.846238	5831.5	0.097413	0.097413	0.001229	0.098642	0.195254	0.314655	0.213729	0.243653	NonVenom	NA
scaffold-ma1	186460897	186461051	intergenic|scaffold-ma1:186460897-186461051	intergenic	25.955	crovir-transcript-8779	185473146	1327.23	0.846238	987828	0	0	0.001229	0.001229	0.031904	0.051414	0.032246	0.03676	NonVenom	NA
scaffold-ma1	190860429	190860702	intergenic|scaffold-ma1:190860429-190860702	intergenic	3.98731	crovir-transcript-8787	190869086	120.712	0.789701	8520.5	0.043133	0.043133	0.001229	0.044362	0.176886	0.098637	0.309565	0.134113	NonVenom	NA
scaffold-ma1	190870271	190870755	intergenic|scaffold-ma1:190870271-190870755	intergenic	9.7909	crovir-transcript-8787	190869086	120.712	0.789701	1427	0.093832	0.093832	0.001229	0.095061	0.930738	0.519008	1.20855	0.523582	NonVenom	NA
scaffold-ma1	190874272	190874567	intergenic|scaffold-ma1:190874272-190874567	intergenic	3.79688	crovir-transcript-8787	190869086	120.712	0.789701	5333.5	0.093832	0.093832	0.001229	0.095061	0.360937	0.201269	0.443074	0.191954	NonVenom	NA
scaffold-ma1	192682813	192682999	intergenic|scaffold-ma1:192682813-192682999	intergenic	2.80397	crovir-transcript-8843	192682023	1336.47	0.712759	883	0.075572	0.075572	0.001229	0.076802	0.215349	0.155357	0.346111	0.163384	NonVenom	NA
scaffold-ma1	194260519	194260934	intergenic|scaffold-ma1:194260519-194260934	intergenic	109.526	crovir-transcript-8843	192682023	1336.47	0.712759	1.5787e+06	0	0	0.000826	0.000826	0.090494	0.065284	0.090494	0.042718	NonVenom	NA
scaffold-ma1	194260519	194260934	intergenic|scaffold-ma1:194260519-194260934	intergenic	109.526	crovir-transcript-8814	194830768	102.372	0.819579	570042	0	0	0.001229	0.001229	0.134629	0.073127	0.219534	0.074454	NonVenom	NA
scaffold-ma1	194821669	194822176	genic|scaffold-ma1:194821669-194822176	genic	7.06513	crovir-transcript-8814	194830768	102.372	0.819579	8845.5	0.01643	0.01643	0.001229	0.017659	0.124762	0.067767	0.530946	0.180069	NonVenom	NA
scaffold-ma1	201106145	201106381	genic|scaffold-ma1:201106145-201106381	genic	5.19086	crovir-transcript-8882	201104522	157.168	0.999636	1741	0.034844	0.034844	0.001229	0.036073	0.187249	0.073611	0.640739	0.088726	NonVenom	NA
scaffold-ma1	201125053	201126070	intergenic|scaffold-ma1:201125053-201126070	intergenic	20.4194	crovir-transcript-8882	201104522	157.168	0.999636	21039.5	0.007839	0.007839	0.001229	0.009069	0.185176	0.072796	0.722113	0.099995	NonVenom	NA
scaffold-ma1	204658531	204658983	genic|scaffold-ma1:204658531-204658983	genic	3.53267	crovir-transcript-8898	204655764	130.487	0.704864	2993	0.05701	0.05701	0.001229	0.05824	0.205741	0.358987	0.436058	0.381524	NonVenom	NA
scaffold-ma1	204884075	204884652	intergenic|scaffold-ma1:204884075-204884652	intergenic	9.60744	crovir-transcript-8900	204687174	175.651	0.279498	197190	0.003337	0.003337	0.001229	0.004567	0.043874	0.078002	0.048493	0.05851	NonVenom	NA
scaffold-ma1	206423704	206423990	intergenic|scaffold-ma1:206423704-206423990	intergenic	2.52908	crovir-transcript-8949	206420237	510.445	0.130959	3610	0.081778	0.081778	0.001229	0.083008	0.209932	0.213543	0.312179	0.189055	NonVenom	NA
scaffold-ma1	206427496	206427632	intergenic|scaffold-ma1:206427496-206427632	intergenic	1.75572	crovir-transcript-8949	206420237	510.445	0.130959	7327	0.081778	0.081778	0.001229	0.083008	0.145738	0.148245	0.155432	0.094129	NonVenom	NA
scaffold-ma1	206429374	206429621	intergenic|scaffold-ma1:206429374-206429621	intergenic	1.15544	crovir-transcript-8949	206420237	510.445	0.130959	9260.5	0.081778	0.081778	0.001229	0.083008	0.09591	0.09756	0.083437	0.050529	NonVenom	NA
scaffold-ma1	207694915	207695091	intergenic|scaffold-ma1:207694915-207695091	intergenic	2.25478	crovir-transcript-8957	207711087	115.873	0.908727	16084	0.038462	0.038462	0.001229	0.039691	0.089495	0.061724	0.100726	0.034916	NonVenom	NA
scaffold-ma1	207699597	207699728	intergenic|scaffold-ma1:207699597-207699728	intergenic	2.13512	crovir-transcript-8957	207711087	115.873	0.908727	11424.5	0.038462	0.038462	0.001229	0.039691	0.084745	0.058449	0.128438	0.044522	NonVenom	NA
scaffold-ma1	207712971	207713542	genic|scaffold-ma1:207712971-207713542	genic	2.16163	crovir-transcript-8957	207711087	115.873	0.908727	2169.5	0.035626	0.035626	0.001229	0.036855	0.079668	0.054947	0.266823	0.092492	NonVenom	NA
scaffold-ma1	207721698	207722173	genic|scaffold-ma1:207721698-207722173	genic	4.18507	crovir-transcript-8957	207711087	115.873	0.908727	10848.5	0.026746	0.026746	0.001229	0.027976	0.117079	0.08075	0.26334	0.091285	NonVenom	NA
scaffold-ma1	207974550	207975097	intergenic|scaffold-ma1:207974550-207975097	intergenic	10.4262	crovir-transcript-8923	207976016	165.365	0.69363	1192.5	0.020614	0.020614	0.001229	0.021843	0.227745	0.2315	1.28697	0.602244	NonVenom	NA
scaffold-ma1	208507833	208508601	intergenic|scaffold-ma1:208507833-208508601	intergenic	13.9771	crovir-transcript-8923	207976016	165.365	0.69363	532201	0.003867	0.003867	0.001229	0.005096	0.071233	0.072407	0.029741	0.013917	NonVenom	NA
scaffold-ma1	209941473	209941737	genic|scaffold-ma1:209941473-209941737	genic	2.30381	crovir-transcript-8937	209938044	3271.92	0.89063	3561	0.127157	0.127157	0.001229	0.128386	0.295777	0.109555	0.284373	0.093753	NonVenom	NA
scaffold-ma1	209942066	209942208	genic|scaffold-ma1:209942066-209942208	genic	1.92835	crovir-transcript-8937	209938044	3271.92	0.89063	4093	0.127157	0.127157	0.001229	0.128386	0.247573	0.091701	0.238028	0.078474	NonVenom	NA
scaffold-ma1	210344073	210344516	intergenic|scaffold-ma1:210344073-210344516	intergenic	7.85138	crovir-transcript-8973	210348815	111.267	0.538349	4520.5	0.074555	0.074555	0.001229	0.075784	0.595011	0.343073	0.969143	0.326049	NonVenom	NA
scaffold-ma1	210449811	210450382	intergenic|scaffold-ma1:210449811-210450382	intergenic	11.3543	crovir-transcript-8973	210348815	111.267	0.538349	101282	0.007774	0.007774	0.001229	0.009004	0.102229	0.058944	0.102322	0.034424	NonVenom	NA
scaffold-ma1	210449811	210450382	intergenic|scaffold-ma1:210449811-210450382	intergenic	11.3543	crovir-transcript-8977	210439923	108.296	0.398615	10173.5	0.007281	0.007281	0.001229	0.00851	0.096629	0.100795	0.75552	0.274077	NonVenom	NA
scaffold-ma1	210452592	210453075	intergenic|scaffold-ma1:210452592-210453075	intergenic	12.8814	crovir-transcript-8973	210348815	111.267	0.538349	104018	0.007774	0.007774	0.001229	0.009004	0.115978	0.066871	0.113421	0.038158	NonVenom	NA
scaffold-ma1	210452592	210453075	intergenic|scaffold-ma1:210452592-210453075	intergenic	12.8814	crovir-transcript-8977	210439923	108.296	0.398615	12910.5	0.007281	0.007281	0.001229	0.00851	0.109625	0.114351	0.696681	0.252732	NonVenom	NA
scaffold-ma1	211259027	211259448	genic|scaffold-ma1:211259027-211259448	genic	15.8082	crovir-transcript-8992	211405867	139.959	0.454333	146630	0.002884	0.002884	0.001229	0.004113	0.065019	0.061026	0.10325	0.035027	NonVenom	NA
scaffold-ma1	211410631	211411271	intergenic|scaffold-ma1:211410631-211411271	intergenic	12.3957	crovir-transcript-8992	211405867	139.959	0.454333	5084	0.005783	0.005783	0.001229	0.007012	0.086919	0.081581	1.50806	0.511608	NonVenom	NA
scaffold-ma1	228693582	228693695	intergenic|scaffold-ma1:228693582-228693695	intergenic	0.332093	crovir-transcript-9130	228691841	130.143	0.75545	1797.5	0.157917	0.157917	0.001229	0.159146	0.052851	0.05416	0.040992	0.036019	NonVenom	NA
scaffold-ma1	230001694	230002036	intergenic|scaffold-ma1:230001694-230002036	intergenic	16.7986	crovir-transcript-9133	229777012	208.39	0.465446	224853	0	0	0.001229	0.001229	0.020649	0.052703	0.075638	0.14365	NonVenom	NA
scaffold-ma1	230001694	230002036	intergenic|scaffold-ma1:230001694-230002036	intergenic	16.7986	crovir-transcript-9132	229781830	116.525	0.453726	220035	0	0	0.001229	0.001229	0.020649	0.052449	0.077077	0.145242	NonVenom	NA
scaffold-ma1	231448489	231448939	intergenic|scaffold-ma1:231448489-231448939	intergenic	3.05059	crovir-transcript-9233	231452940	2054.62	0.667699	4226	0.101724	0.101724	0.001229	0.102953	0.314067	0.140436	0.376553	0.10718	NonVenom	NA
scaffold-ma1	231451071	231451354	intergenic|scaffold-ma1:231451071-231451354	intergenic	5.44407	crovir-transcript-9233	231452940	2054.62	0.667699	1727.5	0.101724	0.101724	0.001229	0.102953	0.560483	0.250621	0.671995	0.191273	NonVenom	NA
scaffold-ma1	231451727	231452088	intergenic|scaffold-ma1:231451727-231452088	intergenic	3.00337	crovir-transcript-9233	231452940	2054.62	0.667699	1032.5	0.101724	0.101724	0.001229	0.102953	0.309205	0.138262	0.370724	0.105521	NonVenom	NA
scaffold-ma1	231464285	231464764	genic|scaffold-ma1:231464285-231464764	genic	7.482	crovir-transcript-9233	231452940	2054.62	0.667699	11584.5	0.020961	0.020961	0.001229	0.02219	0.166026	0.074239	0.444665	0.126567	NonVenom	NA
scaffold-ma1	232079694	232080004	intergenic|scaffold-ma1:232079694-232080004	intergenic	2.47272	crovir-transcript-9210	232077437	392.185	0.551041	2412	0.070122	0.070122	0.001229	0.071351	0.176432	0.226997	0.305223	0.258711	NonVenom	NA
scaffold-ma1	232598232	232598723	intergenic|scaffold-ma1:232598232-232598723	intergenic	4.65387	crovir-transcript-9171	232599708	4273.19	0.728609	1230.5	0.078981	0.078981	0.001229	0.08021	0.373286	0.274322	0.574455	0.319327	NonVenom	NA
scaffold-ma1	234357080	234357487	intergenic|scaffold-ma1:234357080-234357487	intergenic	3.97956	crovir-transcript-9219	234344875	117.794	0.448291	12408.5	0.011257	0.011257	0.001229	0.012487	0.049691	0.059316	0.222787	0.093132	NonVenom	NA
scaffold-ma1	235353442	235354002	intergenic|scaffold-ma1:235353442-235354002	intergenic	4.12838	crovir-transcript-9223	235363673	126.463	0.885043	9951	0.025238	0.025238	0.001229	0.026467	0.109266	0.067602	0.28004	0.10579	NonVenom	NA
scaffold-ma1	244126267	244126431	intergenic|scaffold-ma1:244126267-244126431	intergenic	1.94119	crovir-transcript-9293	244133071	107.909	0.774458	6722	0.049946	0.049946	0.001229	0.051175	0.099341	0.070556	0.185229	0.058649	NonVenom	NA
scaffold-ma1	244127555	244128059	intergenic|scaffold-ma1:244127555-244128059	intergenic	7.16527	crovir-transcript-9293	244133071	107.909	0.774458	5264	0.049946	0.049946	0.001229	0.051175	0.366684	0.260433	0.845741	0.267787	NonVenom	NA
scaffold-ma1	244133598	244134094	genic|scaffold-ma1:244133598-244134094	genic	1.6022	crovir-transcript-9293	244133071	107.909	0.774458	775	0.049946	0.049946	0.001229	0.051175	0.081993	0.058235	0.19777	0.06262	NonVenom	NA
scaffold-ma1	244155982	244156356	intergenic|scaffold-ma1:244155982-244156356	intergenic	4.46912	crovir-transcript-9296	244155120	245.224	0.849092	1049	0.11291	0.11291	0.001229	0.114139	0.5101	0.128864	0.55165	0.119887	NonVenom	NA
scaffold-ma1	244155982	244156356	intergenic|scaffold-ma1:244155982-244156356	intergenic	4.46912	crovir-transcript-9331	244157076	138.798	0.270845	907	0.11291	0.11291	0.001229	0.114139	0.5101	0.128865	0.55165	0.119421	NonVenom	NA
scaffold-ma1	247499088	247499576	intergenic|scaffold-ma1:247499088-247499576	intergenic	8.0604	crovir-transcript-9326	247492391	184.851	0.173468	6941	0.129278	0.129278	0.001229	0.130508	1.05194	0.610097	0.747974	0.365859	NonVenom	NA
scaffold-ma1	249439118	249439683	intergenic|scaffold-ma1:249439118-249439683	intergenic	7.52431	crovir-transcript-9364	249534502	175.371	0.157163	95101.5	0.018105	0.018105	0.001229	0.019335	0.14548	0.15356	0.071624	0.035157	NonVenom	NA
scaffold-ma1	249463206	249463720	genic|scaffold-ma1:249463206-249463720	genic	4.31654	crovir-transcript-9364	249534502	175.371	0.157163	71039	0.013214	0.013214	0.001229	0.014444	0.062347	0.06581	0.05296	0.025996	NonVenom	NA
scaffold-ma1	256507917	256508462	intergenic|scaffold-ma1:256507917-256508462	intergenic	11.3834	crovir-transcript-9468	256447803	108.934	0.989616	60386.5	0.01373	0.01373	0.001229	0.014959	0.17029	0.077419	0.160869	0.043028	NonVenom	NA
scaffold-ma1	256566298	256566808	intergenic|scaffold-ma1:256566298-256566808	intergenic	5.56759	crovir-transcript-9447	256564040	1497.53	0.888869	2513	0.060858	0.060858	0.001229	0.062087	0.345674	0.168457	0.687241	0.20117	Venom	PER3_cvt9447-vQC_1
scaffold-ma1	259655446	259656367	genic|scaffold-ma1:259655446-259656367	genic	15.5143	crovir-transcript-9509	259901136	178.969	0.938969	245230	0.00566	0.00566	0.001229	0.006889	0.106875	0.055792	0.064777	0.016482	NonVenom	NA
scaffold-ma1	260253568	260253889	genic|scaffold-ma1:260253568-260253889	genic	4.95186	crovir-transcript-9439	260248287	635.457	0.939637	5441.5	0.080914	0.080914	0.001229	0.082144	0.406763	0.140035	0.567865	0.134993	Venom	PER4_cvt9439-VEGF_1
scaffold-ma1	261076097	261076362	intergenic|scaffold-ma1:261076097-261076362	intergenic	3.44964	crovir-transcript-9535	261078242	396.306	0.818911	2012.5	0.043434	0.043434	0.001229	0.044663	0.15407	0.098727	0.42581	0.151385	NonVenom	NA
scaffold-ma1	262722467	262723101	genic|scaffold-ma1:262722467-262723101	genic	9.27477	crovir-transcript-9496	262725380	124.975	0.141131	2596	0.041593	0.041593	0.001229	0.042822	0.397166	0.33189	1.14484	0.480634	NonVenom	NA
scaffold-ma1	265388853	265389370	intergenic|scaffold-ma1:265388853-265389370	intergenic	5.01627	crovir-transcript-9531	265390420	178.978	0.521042	1308.5	0.025241	0.025241	0.001229	0.02647	0.132781	0.133	0.619189	0.290051	NonVenom	NA
scaffold-ma1	265633547	265634362	intergenic|scaffold-ma1:265633547-265634362	intergenic	21.6784	crovir-transcript-9577	265864402	262.592	0.972551	230448	0.004336	0.004336	0.001229	0.005565	0.120649	0.061465	0.095545	0.02324	NonVenom	NA
scaffold-ma1	265635179	265635895	intergenic|scaffold-ma1:265635179-265635895	intergenic	26.2534	crovir-transcript-9531	265390420	178.978	0.521042	245117	0.001426	0.001426	0.001229	0.002655	0.069712	0.069827	0.109661	0.051369	NonVenom	NA
scaffold-ma1	268096447	268096610	genic|scaffold-ma1:268096447-268096610	genic	2.14385	crovir-transcript-9588	268099289	137.92	0.877513	2760.5	0.060206	0.060206	0.001229	0.061436	0.131709	0.060588	0.264629	0.057015	NonVenom	NA
scaffold-ma1	268101199	268101592	intergenic|scaffold-ma1:268101199-268101592	intergenic	10.8848	crovir-transcript-9588	268099289	137.92	0.877513	2106.5	0.014123	0.014123	0.001229	0.015352	0.167103	0.076869	1.34357	0.289476	NonVenom	NA
scaffold-ma1	268101199	268101592	intergenic|scaffold-ma1:268101199-268101592	intergenic	10.8848	crovir-transcript-9561	268195133	180.831	0.643529	93737.5	0.012844	0.012844	0.001229	0.014073	0.153182	0.072859	0.104923	0.03038	NonVenom	NA
scaffold-ma1	268127834	268128352	intergenic|scaffold-ma1:268127834-268128352	intergenic	8.43585	crovir-transcript-9561	268195133	180.831	0.643529	67040	0.014768	0.014768	0.001229	0.015997	0.134946	0.064185	0.108851	0.031518	NonVenom	NA
scaffold-ma1	268177752	268178509	intergenic|scaffold-ma1:268177752-268178509	intergenic	15.6331	crovir-transcript-9588	268099289	137.92	0.877513	78841.5	0.007422	0.007422	0.001229	0.008652	0.13525	0.062217	0.17518	0.037743	NonVenom	NA
scaffold-ma1	268177752	268178509	intergenic|scaffold-ma1:268177752-268178509	intergenic	15.6331	crovir-transcript-9561	268195133	180.831	0.643529	17002.5	0.012981	0.012981	0.001229	0.01421	0.222151	0.105663	0.665424	0.192672	NonVenom	NA
scaffold-ma1	268191673	268192187	intergenic|scaffold-ma1:268191673-268192187	intergenic	5.70609	crovir-transcript-9561	268195133	180.831	0.643529	3203	0.065343	0.065343	0.001229	0.066572	0.379867	0.180678	0.704337	0.203939	NonVenom	NA
scaffold-ma1	268494575	268494974	intergenic|scaffold-ma1:268494575-268494974	intergenic	2.29552	crovir-transcript-9567	268492794	159.314	0.691686	1980.5	0.101819	0.101819	0.001229	0.103048	0.236549	0.144428	0.28335	0.113868	NonVenom	NA
scaffold-ma1	269795739	269796009	genic|scaffold-ma1:269795739-269796009	genic	3.58527	crovir-transcript-9581	269808627	531.484	0.269934	12753	0.031441	0.031441	0.001229	0.03267	0.11713	0.074275	0.195988	0.068024	NonVenom	NA
scaffold-ma1	269797465	269797969	genic|scaffold-ma1:269797465-269797969	genic	5.33734	crovir-transcript-9581	269808627	531.484	0.269934	10910	0.031441	0.031441	0.001229	0.03267	0.17437	0.110573	0.334198	0.115995	NonVenom	NA
scaffold-ma1	269810982	269811310	genic|scaffold-ma1:269810982-269811310	genic	1.90564	crovir-transcript-9581	269808627	531.484	0.269934	2519	0.06593	0.06593	0.001229	0.067159	0.127981	0.081156	0.235225	0.081643	NonVenom	NA
scaffold-ma1	269851950	269852376	genic|scaffold-ma1:269851950-269852376	genic	13.1359	crovir-transcript-9600	269315522	124.164	0.937147	536641	0.004674	0.004674	0.001229	0.005903	0.077543	0.051082	0.027749	0.008341	NonVenom	NA
scaffold-ma1	269964683	269965222	intergenic|scaffold-ma1:269964683-269965222	intergenic	68.7018	crovir-transcript-9600	269315522	124.164	0.937147	649430	0	0	0.001229	0.001229	0.084448	0.055631	0.122938	0.036952	NonVenom	NA
scaffold-ma1	269964683	269965222	intergenic|scaffold-ma1:269964683-269965222	intergenic	68.7018	crovir-transcript-9581	269808627	531.484	0.269934	156326	0	0	0.001229	0.001229	0.084448	0.053551	0.424405	0.147304	NonVenom	NA
scaffold-ma1	275399809	275400185	intergenic|scaffold-ma1:275399809-275400185	intergenic	3.9427	crovir-transcript-9640	275393658	109.422	0.471822	6339	0.055611	0.055611	0.001229	0.05684	0.224104	0.198193	0.395911	0.21343	NonVenom	NA
scaffold-ma1	276716671	276717027	genic|scaffold-ma1:276716671-276717027	genic	3.47479	crovir-transcript-9630	276717646	130.15	0.815024	797	0.124324	0.124324	0.001229	0.125553	0.436271	0.200269	0.428914	0.148164	NonVenom	NA
scaffold-ma1	280054119	280055180	intergenic|scaffold-ma1:280054119-280055180	intergenic	26.9888	crovir-transcript-9697	280104899	410.464	0.972187	50249.5	0.013258	0.013258	0.001229	0.014487	0.390986	0.113864	0.44752	0.090519	NonVenom	NA
scaffold-ma1	281298429	281298623	intergenic|scaffold-ma1:281298429-281298623	intergenic	3.41364	crovir-transcript-9728	281299769	150.947	0.796259	1243	0.119743	0.119743	0.001229	0.120973	0.412958	0.182625	0.421367	0.160146	NonVenom	NA
scaffold-ma1	281437397	281437647	intergenic|scaffold-ma1:281437397-281437647	intergenic	4.50288	crovir-transcript-9744	281428267	107.636	0.935568	9255	0.036953	0.036953	0.001229	0.038182	0.171929	0.072135	0.32533	0.077558	NonVenom	NA
scaffold-ma1	281541621	281542737	genic|scaffold-ma1:281541621-281542737	genic	30.0424	crovir-transcript-9728	281299769	150.947	0.796259	242410	0.003636	0.003636	0.001229	0.004865	0.146155	0.064635	0.126706	0.048156	NonVenom	NA
scaffold-ma1	283293075	283293707	intergenic|scaffold-ma1:283293075-283293707	intergenic	5.77946	crovir-transcript-9781	283290242	101.535	0.898464	3149	0.0868	0.0868	0.001229	0.088029	0.50876	0.211229	0.713394	0.19657	NonVenom	NA
scaffold-ma1	283642107	283643006	genic|scaffold-ma1:283642107-283643006	genic	32.6772	crovir-transcript-9782	283469961	323.944	0.784357	172596	0.005951	0.005951	0.001229	0.00718	0.234621	0.123825	0.185203	0.065435	NonVenom	NA
scaffold-ma1	283642107	283643006	genic|scaffold-ma1:283642107-283643006	genic	32.6772	crovir-transcript-9756	283641063	241.317	0.45995	1493.5	0.043786	0.043786	0.001229	0.045015	1.47097	0.560483	4.03355	0.630562	NonVenom	NA
scaffold-ma1	292242947	292243580	genic|scaffold-ma1:292242947-292243580	genic	3.40071	crovir-transcript-9832	292241674	161.699	0.786604	1589.5	0.061504	0.061504	0.001229	0.062734	0.213339	0.160283	0.41977	0.207608	NonVenom	NA
scaffold-ma1	292265450	292265748	intergenic|scaffold-ma1:292265450-292265748	intergenic	12.3063	crovir-transcript-9832	292241674	161.699	0.786604	23925	0.004182	0.004182	0.001229	0.005411	0.066587	0.050027	0.389162	0.19247	NonVenom	NA
scaffold-ma1	292279886	292280230	genic|scaffold-ma1:292279886-292280230	genic	5.46443	crovir-transcript-9832	292241674	161.699	0.786604	38384	0.011757	0.011757	0.001229	0.012987	0.070965	0.053316	0.114537	0.056647	NonVenom	NA
scaffold-ma1	293158053	293158312	intergenic|scaffold-ma1:293158053-293158312	intergenic	1.12554	crovir-transcript-9803	293153987	102.134	0.649056	4195.5	0.163489	0.163489	0.001229	0.164718	0.185397	0.20064	0.138932	0.095747	NonVenom	NA
scaffold-ma1	293158702	293158845	intergenic|scaffold-ma1:293158702-293158845	intergenic	0.692007	crovir-transcript-9803	293153987	102.134	0.649056	4786.5	0.163489	0.163489	0.001229	0.164718	0.113986	0.123358	0.085419	0.058867	NonVenom	NA
scaffold-ma1	296337107	296338230	intergenic|scaffold-ma1:296337107-296338230	intergenic	42.6651	crovir-transcript-9890	296316233	122.431	0.442673	21435.5	0.013674	0.013674	0.001229	0.014903	0.635843	0.343359	1.48453	0.463755	NonVenom	NA
scaffold-ma1	298467351	298468396	intergenic|scaffold-ma1:298467351-298468396	intergenic	31.7932	crovir-transcript-9911	297738254	133.495	0.779923	729620	0.001516	0.001516	0.001229	0.002745	0.087285	0.051106	0.051412	0.023738	NonVenom	NA
scaffold-ma1	299035579	299036741	intergenic|scaffold-ma1:299035579-299036741	intergenic	37.6453	crovir-transcript-9959	298363153	152.368	0.992773	673007	0.002055	0.002055	0.001229	0.003284	0.123627	0.053204	0.065306	0.011873	NonVenom	NA
scaffold-ma1	299035579	299036741	intergenic|scaffold-ma1:299035579-299036741	intergenic	37.6453	crovir-transcript-9971	299160916	109.695	0.863667	124756	0.003942	0.003942	0.001229	0.005171	0.19468	0.101765	0.28298	0.09671	NonVenom	NA
scaffold-ma1	299035579	299036741	intergenic|scaffold-ma1:299035579-299036741	intergenic	37.6453	crovir-transcript-10001	299463438	162.986	0.8514	427278	0.001858	0.001858	0.001229	0.003087	0.116227	0.057594	0.096964	0.027321	NonVenom	NA
scaffold-ma1	299511208	299511727	intergenic|scaffold-ma1:299511208-299511727	intergenic	8.35934	crovir-transcript-10002	299532713	200.034	0.538532	21245.5	0.010453	0.010453	0.001229	0.011682	0.097655	0.054497	0.293125	0.072628	NonVenom	NA
scaffold-ma1	299524844	299525261	intergenic|scaffold-ma1:299524844-299525261	intergenic	1.98161	crovir-transcript-10002	299532713	200.034	0.538532	7660.5	0.054441	0.054441	0.001229	0.05567	0.110317	0.061563	0.168766	0.041816	NonVenom	NA
scaffold-ma1	299532030	299532190	intergenic|scaffold-ma1:299532030-299532190	intergenic	2.50146	crovir-transcript-10002	299532713	200.034	0.538532	603	0.121584	0.121584	0.001229	0.122813	0.307211	0.171441	0.30877	0.076504	NonVenom	NA
scaffold-ma1	302537045	302537272	genic|scaffold-ma1:302537045-302537272	genic	1.26658	crovir-transcript-9999	302538672	126.931	0.973766	1513.5	0.090659	0.090659	0.001229	0.091888	0.116384	0.05217	0.156342	0.045878	NonVenom	NA
scaffold-ma1	303911352	303911615	intergenic|scaffold-ma1:303911352-303911615	intergenic	0.677169	crovir-transcript-10035	303925385	169.442	0.39649	13901.5	0.040213	0.040213	0.001229	0.041442	0.028064	0.055228	0.034342	0.040529	NonVenom	NA
scaffold-ma1	309193906	309194261	intergenic|scaffold-ma1:309193906-309194261	intergenic	3.07234	crovir-transcript-10075	309175890	105.457	0.786846	18193.5	0.02327	0.02327	0.001229	0.0245	0.075271	0.07018	0.123294	0.075861	NonVenom	NA
scaffold-ma1	310384656	310384905	genic|scaffold-ma1:310384656-310384905	genic	1.48052	crovir-transcript-10063	310383444	178.685	0.766624	1336.5	0.101773	0.101773	0.001229	0.103002	0.152496	0.172417	0.182749	0.128739	NonVenom	NA
scaffold-ma7	193262	193883	intergenic|scaffold-ma7:193262-193883	intergenic	7.30325	crovir-transcript-4268	822678	293.707	0.430862	629106	0.002267	0.002267	0.001229	0.003496	0.025532	0.051379	0.013435	0.010698	NonVenom	NA
scaffold-ma7	591141	591890	intergenic|scaffold-ma7:591141-591890	intergenic	10.6049	crovir-transcript-4274	1347501	187.793	0.64857	755986	0.002939	0.002939	0.001229	0.004168	0.044202	0.080927	0.016627	0.020263	NonVenom	NA
scaffold-ma7	709051	709530	intergenic|scaffold-ma7:709051-709530	intergenic	6.6947	crovir-transcript-4268	822678	293.707	0.430862	113388	0.003858	0.003858	0.001229	0.005088	0.03406	0.068542	0.054686	0.043544	NonVenom	NA
scaffold-ma7	815221	815886	genic|scaffold-ma7:815221-815886	genic	1.08917	crovir-transcript-4268	822678	293.707	0.430862	7124.5	0.025094	0.025094	0.001229	0.026324	0.028671	0.057696	0.098803	0.078672	NonVenom	NA
scaffold-ma7	823857	824414	intergenic|scaffold-ma7:823857-824414	intergenic	1.39991	crovir-transcript-4268	822678	293.707	0.430862	1457.5	0.025094	0.025094	0.001229	0.026324	0.036851	0.074157	0.1728	0.137592	NonVenom	NA
scaffold-ma7	1135904	1136018	intergenic|scaffold-ma7:1135904-1136018	intergenic	1.91826	crovir-transcript-4283	2740251	236.505	0.372381	1604290	0.006903	0.006903	0.000815	0.007718	0.014805	0.05381	0.001563	0.004718	NonVenom	NA
scaffold-ma7	1351478	1351928	genic|scaffold-ma7:1351478-1351928	genic	3.84874	crovir-transcript-4274	1347501	187.793	0.64857	4202	0.05454	0.05454	0.001229	0.055769	0.21464	0.392972	0.475073	0.578951	NonVenom	NA
scaffold-ma7	4422621	4423026	genic|scaffold-ma7:4422621-4423026	genic	7.70068	crovir-transcript-4295	4434744	218.584	0.956701	11920.5	0.029679	0.029679	0.001229	0.030908	0.238012	0.050697	0.446419	0.09427	NonVenom	NA
scaffold-ma7	4438152	4438478	intergenic|scaffold-ma7:4438152-4438478	intergenic	3.7046	crovir-transcript-4295	4434744	218.584	0.956701	3571	0.12798	0.12798	0.001229	0.129209	0.478669	0.101958	0.457282	0.096563	NonVenom	NA
scaffold-ma7	4438591	4438847	intergenic|scaffold-ma7:4438591-4438847	intergenic	4.77799	crovir-transcript-4295	4434744	218.584	0.956701	3975	0.12798	0.12798	0.001229	0.129209	0.617361	0.131499	0.589777	0.124542	NonVenom	NA
scaffold-ma7	4629596	4630075	genic|scaffold-ma7:4629596-4630075	genic	3.54011	crovir-transcript-4302	4636587	381.328	0.642801	6751.5	0.016738	0.016738	0.001229	0.017968	0.063607	0.060895	0.336514	0.158597	NonVenom	NA
scaffold-ma7	4642615	4642857	intergenic|scaffold-ma7:4642615-4642857	intergenic	6.88159	crovir-transcript-4302	4636587	381.328	0.642801	6149	0.054842	0.054842	0.001229	0.056071	0.38586	0.369403	0.709559	0.334412	NonVenom	NA
scaffold-ma7	4647241	4647733	intergenic|scaffold-ma7:4647241-4647733	intergenic	6.22019	crovir-transcript-4302	4636587	381.328	0.642801	10900	0.015108	0.015108	0.001229	0.016337	0.101621	0.097287	0.389789	0.183706	NonVenom	NA
scaffold-ma7	16780648	16780889	intergenic|scaffold-ma7:16780648-16780889	intergenic	4.75958	crovir-transcript-4420	16790484	410.211	0.840287	9715.5	0.062413	0.062413	0.001229	0.063642	0.302911	0.12333	0.329653	0.075772	NonVenom	NA
scaffold-ma7	16783949	16784582	genic|scaffold-ma7:16783949-16784582	genic	9.86767	crovir-transcript-4420	16790484	410.211	0.840287	6218.5	0.062413	0.062413	0.001229	0.063642	0.628002	0.255691	1.00756	0.23159	NonVenom	NA
scaffold-ma7	16796142	16796435	intergenic|scaffold-ma7:16796142-16796435	intergenic	4.20129	crovir-transcript-4420	16790484	410.211	0.840287	5804.5	0.059968	0.059968	0.001229	0.061197	0.257106	0.104681	0.455474	0.104692	NonVenom	NA
scaffold-ma7	18107095	18107337	intergenic|scaffold-ma7:18107095-18107337	intergenic	8.31031	crovir-transcript-4429	18143401	118.68	0.182061	36185	0.004824	0.004824	0.001229	0.006053	0.050302	0.057656	0.183362	0.124661	NonVenom	NA
scaffold-ma7	18107744	18108340	intergenic|scaffold-ma7:18107744-18108340	intergenic	10.4937	crovir-transcript-4429	18143401	118.68	0.182061	35359	0.004824	0.004824	0.001229	0.006053	0.063518	0.072804	0.236234	0.160607	NonVenom	NA
scaffold-ma7	18174501	18174971	intergenic|scaffold-ma7:18174501-18174971	intergenic	2.47902	crovir-transcript-4430	18169516	108.223	0.699277	5220	0.046314	0.046314	0.001229	0.047543	0.117861	0.08267	0.294751	0.168476	NonVenom	NA
scaffold-ma7	18272947	18273472	genic|scaffold-ma7:18272947-18273472	genic	7.35811	crovir-transcript-4430	18169516	108.223	0.699277	103694	0.016251	0.016251	0.001229	0.01748	0.128622	0.090218	0.064965	0.037133	NonVenom	NA
scaffold-ma7	18275172	18275453	intergenic|scaffold-ma7:18275172-18275453	intergenic	6.09405	crovir-transcript-4430	18169516	108.223	0.699277	105796	0.013249	0.013249	0.001229	0.014478	0.088229	0.061885	0.052873	0.030222	NonVenom	NA
scaffold-ma7	23837787	23838812	genic|scaffold-ma7:23837787-23838812	genic	22.9335	crovir-transcript-4490	23871611	102.829	0.969211	33311.5	0.010251	0.010251	0.001229	0.01148	0.263277	0.068625	0.543781	0.126995	NonVenom	NA
scaffold-ma7	23837787	23838812	genic|scaffold-ma7:23837787-23838812	genic	22.9335	crovir-transcript-4496	25092922	165.104	0.741665	1.25462e+06	0	0	0.001009	0.001009	0.023141	0.05431	0.023141	0.046319	NonVenom	NA
scaffold-ma7	23872490	23872925	intergenic|scaffold-ma7:23872490-23872925	intergenic	4.36934	crovir-transcript-4490	23871611	102.829	0.969211	1096.5	0.139538	0.139538	0.001229	0.140767	0.61506	0.160319	0.539334	0.125956	NonVenom	NA
scaffold-ma7	30727614	30727814	genic|scaffold-ma7:30727614-30727814	genic	1.09084	crovir-transcript-4528	30726330	132.494	0.782838	1384	0.086695	0.086695	0.001229	0.087924	0.095911	0.070969	0.134649	0.078355	NonVenom	NA
scaffold-ma7	30733165	30733590	genic|scaffold-ma7:30733165-30733590	genic	1.50651	crovir-transcript-4528	30726330	132.494	0.782838	7047.5	0.086695	0.086695	0.001229	0.087924	0.132459	0.098012	0.137959	0.080281	NonVenom	NA
scaffold-ma7	32223751	32225514	intergenic|scaffold-ma7:32223751-32225514	intergenic	46.8795	crovir-transcript-4542	31628192	144.186	0.938726	596440	0	0	0.001229	0.001229	0.057624	0.051299	0.090336	0.039946	NonVenom	NA
scaffold-ma7	32223751	32225514	intergenic|scaffold-ma7:32223751-32225514	intergenic	46.8795	crovir-transcript-4551	32744968	141.048	0.194966	520336	0	0	0.001229	0.001229	0.057624	0.087999	0.101727	0.099089	NonVenom	NA
scaffold-ma7	32225653	32226564	intergenic|scaffold-ma7:32225653-32226564	intergenic	40.3769	crovir-transcript-4551	32744968	141.048	0.194966	518860	0	0	0.001229	0.001229	0.049631	0.075793	0.087834	0.085556	NonVenom	NA
scaffold-ma7	32676861	32677251	intergenic|scaffold-ma7:32676861-32677251	intergenic	4.16068	crovir-transcript-4551	32744968	141.048	0.194966	67912	0.011761	0.011761	0.001229	0.012991	0.054049	0.08254	0.053087	0.05171	NonVenom	NA
scaffold-ma7	32747114	32747580	genic|scaffold-ma7:32747114-32747580	genic	1.96294	crovir-transcript-4551	32744968	141.048	0.194966	2379	0.039117	0.039117	0.001229	0.040346	0.079198	0.120944	0.242297	0.236014	NonVenom	NA
scaffold-ma7	48207961	48208430	intergenic|scaffold-ma7:48207961-48208430	intergenic	40.3066	crovir-transcript-4669	47313801	236.015	0.04427	894394	0	0	0.001229	0.001229	0.049545	0.127716	0.054597	0.082418	NonVenom	NA
scaffold-ma7	52115384	52115863	genic|scaffold-ma7:52115384-52115863	genic	10.2867	crovir-transcript-4695	52003934	1044.89	0.607579	111690	0.00974	0.00974	0.001229	0.010969	0.112835	0.149932	0.085138	0.046367	NonVenom	NA
scaffold-ma7	52115384	52115863	genic|scaffold-ma7:52115384-52115863	genic	10.2867	crovir-transcript-4694	52106661	624.304	0.982753	8962.5	0.02863	0.02863	0.001229	0.029859	0.30715	0.076626	0.76426	0.15858	NonVenom	NA
scaffold-ma7	52127936	52128498	genic|scaffold-ma7:52127936-52128498	genic	6.99266	crovir-transcript-4695	52003934	1044.89	0.607579	124283	0.013556	0.013556	0.001229	0.014786	0.103391	0.137383	0.052738	0.028722	NonVenom	NA
scaffold-ma7	61259264	61259906	intergenic|scaffold-ma7:61259264-61259906	intergenic	8.08151	crovir-transcript-4776	61465641	132.9	0.286998	206056	0.003556	0.003556	0.001229	0.004785	0.03867	0.139265	0.03926	0.045137	NonVenom	NA
scaffold-ma7	61385246	61385562	intergenic|scaffold-ma7:61385246-61385562	intergenic	4.6106	crovir-transcript-4776	61465641	132.9	0.286998	80237	0.006581	0.006581	0.001229	0.00781	0.036009	0.129679	0.050882	0.0585	NonVenom	NA
scaffold-ma7	61471240	61471716	intergenic|scaffold-ma7:61471240-61471716	intergenic	1.52434	crovir-transcript-4776	61465641	132.9	0.286998	5837	0.018612	0.018612	0.001229	0.019841	0.030245	0.108923	0.164458	0.189079	NonVenom	NA
scaffold-ma7	61471240	61471716	intergenic|scaffold-ma7:61471240-61471716	intergenic	1.52434	crovir-transcript-4775	61502145	2641.66	0.440487	30667	0.015381	0.015381	0.001229	0.016611	0.02532	0.071502	0.038841	0.038566	NonVenom	NA
scaffold-ma7	61526408	61527013	intergenic|scaffold-ma7:61526408-61527013	intergenic	4.05126	crovir-transcript-4775	61502145	2641.66	0.440487	24565.5	0.009195	0.009195	0.001229	0.010424	0.042231	0.119258	0.125202	0.124318	NonVenom	NA
scaffold-ma7	61529579	61529895	intergenic|scaffold-ma7:61529579-61529895	intergenic	2.0741	crovir-transcript-4775	61502145	2641.66	0.440487	27592	0.009195	0.009195	0.001229	0.010424	0.021621	0.061056	0.057937	0.057528	NonVenom	NA
scaffold-ma7	61591696	61592169	genic|scaffold-ma7:61591696-61592169	genic	5.54411	crovir-transcript-4775	61502145	2641.66	0.440487	89787.5	0.003828	0.003828	0.001229	0.005057	0.028037	0.079174	0.055482	0.05509	NonVenom	NA
scaffold-mi1	1969116	1969601	intergenic|scaffold-mi1:1969116-1969601	intergenic	9.05598	crovir-transcript-12675	1537018	527.351	0.377543	432340	0.001956	0.001956	0.001229	0.003185	0.028848	0.090147	0.023088	0.052225	NonVenom	NA
scaffold-mi1	1978289	1978733	intergenic|scaffold-mi1:1978289-1978733	intergenic	9.15677	crovir-transcript-12675	1537018	527.351	0.377543	441493	0.002463	0.002463	0.001229	0.003692	0.03381	0.105653	0.022923	0.051853	NonVenom	NA
scaffold-mi1	1998771	1999316	intergenic|scaffold-mi1:1998771-1999316	intergenic	4.69427	crovir-transcript-12675	1537018	527.351	0.377543	462026	0.002554	0.002554	0.001229	0.003783	0.017759	0.055496	0.011296	0.025552	NonVenom	NA
scaffold-mi1	6775815	6776334	genic|scaffold-mi1:6775815-6776334	genic	3.9884	crovir-transcript-12732	6782274	191.302	0.393818	6199.5	0.046134	0.046134	0.001229	0.047363	0.188901	0.330865	0.408327	0.304188	NonVenom	NA
scaffold-mi1	7164915	7165459	intergenic|scaffold-mi1:7164915-7165459	intergenic	10.0532	crovir-transcript-12733	7063784	412.525	0.588935	101403	0.006152	0.006152	0.001229	0.007382	0.074209	0.094234	0.090502	0.062925	NonVenom	NA
scaffold-mi1	7164915	7165459	intergenic|scaffold-mi1:7164915-7165459	intergenic	10.0532	crovir-transcript-12738	7080305	318.79	0.530971	84882	0.007447	0.007447	0.001229	0.008676	0.08722	0.132064	0.105645	0.08588	NonVenom	NA
scaffold-mi1	7164915	7165459	intergenic|scaffold-mi1:7164915-7165459	intergenic	10.0532	crovir-transcript-12742	7186133	771.447	0.710148	20946	0.010016	0.010016	0.001229	0.011246	0.113055	0.138815	0.356902	0.20365	NonVenom	NA
scaffold-mi1	7183473	7183750	intergenic|scaffold-mi1:7183473-7183750	intergenic	4.53331	crovir-transcript-12733	7063784	412.525	0.588935	119828	0.013053	0.013053	0.001229	0.014283	0.064748	0.08222	0.035293	0.024539	NonVenom	NA
scaffold-mi1	7183473	7183750	intergenic|scaffold-mi1:7183473-7183750	intergenic	4.53331	crovir-transcript-12738	7080305	318.79	0.530971	103306	0.008977	0.008977	0.001229	0.010206	0.046268	0.070056	0.040155	0.032642	NonVenom	NA
scaffold-mi1	7183473	7183750	intergenic|scaffold-mi1:7183473-7183750	intergenic	4.53331	crovir-transcript-12742	7186133	771.447	0.710148	2521.5	0.033119	0.033119	0.001229	0.034349	0.155713	0.191194	0.559574	0.319296	NonVenom	NA
scaffold-mi1	7189701	7189859	genic|scaffold-mi1:7189701-7189859	genic	0.585517	crovir-transcript-12742	7186133	771.447	0.710148	3647	0.108561	0.108561	0.001229	0.109791	0.064284	0.078932	0.072274	0.04124	NonVenom	NA
scaffold-mi1	8881245	8881602	intergenic|scaffold-mi1:8881245-8881602	intergenic	0.998826	crovir-transcript-12777	8884003	121.093	0.555839	2579.5	0.064627	0.064627	0.001229	0.065856	0.065779	0.091949	0.123291	0.117896	NonVenom	NA
scaffold-mi1	9057268	9057428	intergenic|scaffold-mi1:9057268-9057428	intergenic	2.70868	crovir-transcript-12783	9058242	289.204	0.791522	894	0.103935	0.103935	0.001229	0.105165	0.284857	0.113217	0.334348	0.124201	NonVenom	NA
scaffold-mi1	9062954	9063147	genic|scaffold-mi1:9062954-9063147	genic	2.70975	crovir-transcript-12783	9058242	289.204	0.791522	4808.5	0.103935	0.103935	0.001229	0.105165	0.28497	0.113262	0.33448	0.12425	NonVenom	NA
scaffold-mi1	9064408	9064813	genic|scaffold-mi1:9064408-9064813	genic	8.45082	crovir-transcript-12783	9058242	289.204	0.791522	6368.5	0.103935	0.103935	0.001229	0.105165	0.888728	0.353227	0.845179	0.313959	NonVenom	NA
scaffold-mi1	9497185	9497366	intergenic|scaffold-mi1:9497185-9497366	intergenic	1.00281	crovir-transcript-12794	9495652	231.211	0.628226	1623.5	0.126552	0.126552	0.001229	0.127782	0.128141	0.060603	0.123783	0.032862	NonVenom	NA
scaffold-mi1	9517201	9517890	intergenic|scaffold-mi1:9517201-9517890	intergenic	16.4398	crovir-transcript-12794	9495652	231.211	0.628226	21893.5	0.042196	0.042196	0.001229	0.043425	0.713899	0.33763	0.561599	0.149094	NonVenom	NA
scaffold-mi1	9522862	9523556	intergenic|scaffold-mi1:9522862-9523556	intergenic	13.1546	crovir-transcript-12794	9495652	231.211	0.628226	27557	0.035266	0.035266	0.001229	0.036495	0.480078	0.227048	0.367862	0.09766	NonVenom	NA
scaffold-mi1	9766578	9766761	genic|scaffold-mi1:9766578-9766761	genic	4.63743	crovir-transcript-12806	9773870	160.331	0.938301	7200.5	0.028399	0.028399	0.001229	0.029628	0.137396	0.071835	0.416813	0.080062	NonVenom	NA
scaffold-mi1	9768987	9769648	genic|scaffold-mi1:9768987-9769648	genic	10.3323	crovir-transcript-12806	9773870	160.331	0.938301	4552.5	0.028399	0.028399	0.001229	0.029628	0.306124	0.16005	1.27538	0.244978	NonVenom	NA
scaffold-mi1	9770782	9771047	genic|scaffold-mi1:9770782-9771047	genic	5.84463	crovir-transcript-12806	9773870	160.331	0.938301	2955.5	0.028399	0.028399	0.001229	0.029628	0.173163	0.090534	0.721438	0.138575	NonVenom	NA
scaffold-mi1	10908278	10909071	intergenic|scaffold-mi1:10908278-10909071	intergenic	13.7642	crovir-transcript-12784	9086902	1545.77	0.653033	1.82177e+06	0.001614	0.001614	0.000729	0.002343	0.032254	0.064062	0.01004	0.007887	NonVenom	NA
scaffold-mi1	11606431	11606876	intergenic|scaffold-mi1:11606431-11606876	intergenic	3.26336	crovir-transcript-12819	11618058	106.14	0.860873	11404.5	0.02812	0.02812	0.001229	0.029349	0.095777	0.052349	0.196606	0.053553	NonVenom	NA
scaffold-mi1	11607977	11608685	intergenic|scaffold-mi1:11607977-11608685	intergenic	16.808	crovir-transcript-12819	11618058	106.14	0.860873	9727	0.02812	0.02812	0.001229	0.029349	0.493302	0.269624	1.16294	0.31677	NonVenom	NA
scaffold-mi1	11622700	11623078	genic|scaffold-mi1:11622700-11623078	genic	3.5988	crovir-transcript-12819	11618058	106.14	0.860873	4831	0.057674	0.057674	0.001229	0.058903	0.211981	0.115862	0.444222	0.121	NonVenom	NA
scaffold-mi1	14193627	14194151	intergenic|scaffold-mi1:14193627-14194151	intergenic	2.49332	crovir-transcript-SVMP_5	14190263	150.437	0.791462	3626	0.10487	0.10487	0.001229	0.1061	0.26454	0.15626	0.307766	0.140097	Venom	PER9_SVMP_5
scaffold-mi1	14197539	14198130	intergenic|scaffold-mi1:14197539-14198130	intergenic	1.66265	crovir-transcript-SVMP_5	14190263	150.437	0.791462	7571.5	0.053399	0.053399	0.001229	0.054628	0.090828	0.05365	0.143049	0.065117	Venom	PER10_SVMP_5
scaffold-mi1	14203264	14203870	intergenic|scaffold-mi1:14203264-14203870	intergenic	3.55422	crovir-transcript-SVMP_5	14190263	150.437	0.791462	13304	0.034742	0.034742	0.001229	0.035971	0.127849	0.075518	0.187272	0.085247	Venom	PER11_SVMP_5
scaffold-mi1	14246402	14246862	intergenic|scaffold-mi1:14246402-14246862	intergenic	2.6779	crovir-transcript-SVMP_6	14242394	1033.73	0.800389	4238	0.11079	0.11079	0.001229	0.11202	0.299977	0.162798	0.330549	0.146763	Venom	PER12_SVMP_6
scaffold-mi1	14276792	14277191	intergenic|scaffold-mi1:14276792-14277191	intergenic	1.50217	crovir-transcript-SVMP_7	14272851	934.465	0.76711	4140.5	0.115874	0.115874	0.001229	0.117103	0.175909	0.10549	0.185422	0.084879	Venom	PER13_SVMP_7
scaffold-mi1	14304569	14305089	intergenic|scaffold-mi1:14304569-14305089	intergenic	3.01302	crovir-transcript-SVMP_8	14300903	707.255	0.799903	3926	0.036118	0.036118	0.001229	0.037347	0.112528	0.076961	0.371915	0.157366	Venom	PER14_SVMP_8
scaffold-mi1	14395528	14396031	intergenic|scaffold-mi1:14395528-14396031	intergenic	5.35457	crovir-transcript-SVMP_10	14393455	985.527	0.770329	2324.5	0.092113	0.092113	0.001229	0.093342	0.499808	0.28247	0.660948	0.263626	Venom	PER15_SVMP_10
scaffold-mi1	14704955	14705458	intergenic|scaffold-mi1:14704955-14705458	intergenic	3.45185	crovir-transcript-12866	14713175	155.204	0.498026	7968.5	0.033032	0.033032	0.001229	0.034261	0.118264	0.084435	0.284072	0.105212	NonVenom	NA
scaffold-mi1	14710431	14711126	intergenic|scaffold-mi1:14710431-14711126	intergenic	7.02899	crovir-transcript-12866	14713175	155.204	0.498026	2396.5	0.03306	0.03306	0.001229	0.034289	0.241019	0.172076	0.867631	0.321346	NonVenom	NA
scaffold-mi1	17324938	17325288	intergenic|scaffold-mi1:17324938-17325288	intergenic	5.51965	crovir-transcript-12912	17326869	255.273	0.793041	1756	0.144991	0.144991	0.001229	0.14622	0.807082	0.204158	0.681324	0.156534	NonVenom	NA
scaffold-mi1	17327819	17328086	genic|scaffold-mi1:17327819-17328086	genic	1.78878	crovir-transcript-12912	17326869	255.273	0.793041	1083.5	0.144991	0.144991	0.001229	0.14622	0.261556	0.066163	0.2208	0.050729	NonVenom	NA
scaffold-mi1	17334415	17335001	intergenic|scaffold-mi1:17334415-17335001	intergenic	5.41441	crovir-transcript-12912	17326869	255.273	0.793041	7839	0.047868	0.047868	0.001229	0.049097	0.265831	0.067244	0.451978	0.103842	NonVenom	NA
scaffold-mi1	17335340	17335504	intergenic|scaffold-mi1:17335340-17335504	intergenic	1.48566	crovir-transcript-12919	17340376	123.938	0.565282	4954	0.101895	0.101895	0.001229	0.103124	0.153208	0.082979	0.183384	0.047742	NonVenom	NA
scaffold-mi1	17420259	17420591	genic|scaffold-mi1:17420259-17420591	genic	4.72616	crovir-transcript-12932	17422988	104.064	0.987004	2563	0.084812	0.084812	0.001229	0.086042	0.406646	0.088073	0.583378	0.083173	NonVenom	NA
scaffold-mi1	17424750	17424969	intergenic|scaffold-mi1:17424750-17424969	intergenic	3.11258	crovir-transcript-12932	17422988	104.064	0.987004	1871.5	0.084812	0.084812	0.001229	0.086042	0.267811	0.058004	0.384204	0.054776	NonVenom	NA
scaffold-mi1	17427550	17427804	intergenic|scaffold-mi1:17427550-17427804	intergenic	5.09503	crovir-transcript-12932	17422988	104.064	0.987004	4689	0.084812	0.084812	0.001229	0.086042	0.438385	0.094947	0.62891	0.089664	NonVenom	NA
scaffold-mi1	17430945	17431290	intergenic|scaffold-mi1:17430945-17431290	intergenic	8.91361	crovir-transcript-12932	17422988	104.064	0.987004	8129.5	0.027934	0.027934	0.001229	0.029163	0.259946	0.0563	0.720897	0.102779	NonVenom	NA
scaffold-mi1	18106557	18107235	genic|scaffold-mi1:18106557-18107235	genic	15.3016	crovir-transcript-12955	18108092	728.55	0.940791	1196	0.117643	0.117643	0.001229	0.118872	1.81894	0.417131	1.88877	0.311244	NonVenom	NA
scaffold-mi1	19155823	19156007	intergenic|scaffold-mi1:19155823-19156007	intergenic	5.9981	crovir-transcript-13005	19162116	205.764	0.814477	6201	0.106103	0.106103	0.001229	0.107332	0.643788	0.107001	0.613949	0.076493	NonVenom	NA
scaffold-mi1	19156803	19157214	intergenic|scaffold-mi1:19156803-19157214	intergenic	7.47773	crovir-transcript-13005	19162116	205.764	0.814477	5107.5	0.106103	0.106103	0.001229	0.107332	0.8026	0.133396	0.9061	0.112893	NonVenom	NA
scaffold-mi1	19158932	19159219	intergenic|scaffold-mi1:19158932-19159219	intergenic	10.3714	crovir-transcript-13005	19162116	205.764	0.814477	3040.5	0.106103	0.106103	0.001229	0.107332	1.11318	0.185016	1.2802	0.159503	NonVenom	NA
scaffold-mi1	19160150	19160524	intergenic|scaffold-mi1:19160150-19160524	intergenic	8.79029	crovir-transcript-13005	19162116	205.764	0.814477	1779	0.106103	0.106103	0.001229	0.107332	0.943479	0.156811	1.08504	0.135187	NonVenom	NA
scaffold-mi1	19160150	19160524	intergenic|scaffold-mi1:19160150-19160524	intergenic	8.79029	crovir-transcript-13002	19168043	308.944	0.608125	7706	0.059489	0.059489	0.001229	0.060718	0.533726	0.200403	0.744791	0.120872	NonVenom	NA
scaffold-mi1	19447038	19447440	intergenic|scaffold-mi1:19447038-19447440	intergenic	11.7267	crovir-transcript-13001	19451608	157.865	0.584715	4369	0.112596	0.112596	0.001229	0.113825	1.33479	0.453573	1.4475	0.364574	NonVenom	NA
scaffold-mi1	19632639	19633037	intergenic|scaffold-mi1:19632639-19633037	intergenic	7.39509	crovir-transcript-13015	19620405	134.756	0.809012	12433	0.019805	0.019805	0.001229	0.021035	0.155553	0.080631	0.413289	0.110475	NonVenom	NA
scaffold-mi1	22092863	22093910	genic|scaffold-mi1:22092863-22093910	genic	16.7067	crovir-transcript-13074	22080546	831.261	0.977652	12840.5	0.035535	0.035535	0.001229	0.036764	0.614211	0.214395	0.907853	0.171048	NonVenom	NA
scaffold-mi1	22092863	22093910	genic|scaffold-mi1:22092863-22093910	genic	16.7067	crovir-transcript-13092	22106915	464.449	0.941034	13528.5	0.007848	0.007848	0.001229	0.009077	0.151643	0.064574	0.867553	0.178852	NonVenom	NA
scaffold-mi1	22092863	22093910	genic|scaffold-mi1:22092863-22093910	genic	16.7067	crovir-transcript-13076	22106918	3290.73	0.940548	13531.5	0.007848	0.007848	0.001229	0.009077	0.151643	0.064574	0.867386	0.178824	NonVenom	NA
