# Supplementary material for: Snake venom gene expression is coordinated by novel regulatory architecture and the integration of multiple co-opted vertebrate pathways
Source: HighWire-hosted journal article supplement (doi:10.1101/gr.276251.121), 2022-06-01
Supplement: Supplemental_Table_S6.xlsx [file Supplemental_Table_S6.xlsx]

## Sheet: Supplemental_Table_S6
Supplemental Table S6. BLAST results of SVMP and PLA2 core enhancer sequences against all snake sequences on NCBI and available snake reference genomes.
Query ID	Subject ID	Subject Organism	Percent of Identical Matches	Hit Length	# Mismatches	# Gap Openings	Query Start	Query End	Subject Start	Subject End	e-value	Bit score
PLA2_vPER_Core:Consensus/1-148	KX211995.1	Crotalus atrox	96.622	148	5	0	1	148	71959	71812	2.43e-63	245
PLA2_vPER_Core:Consensus/1-148	KX211995.1	Crotalus atrox	89.865	148	15	0	1	148	47413	47560	9.06e-50	200
PLA2_vPER_Core:Consensus/1-148	KX211995.1	Crotalus atrox	90	150	8	3	1	148	77458	77602	1.1e-48	196
PLA2_vPER_Core:Consensus/1-148	KX211995.1	Crotalus atrox	88.514	148	17	0	1	148	81683	81536	4.69e-47	191
PLA2_vPER_Core:Consensus/1-148	KX211995.1	Crotalus atrox	87.387	111	14	0	38	148	56706	56596	2.6e-31	138
PLA2_vPER_Core:Consensus/1-148	KX211994.1	Crotalus atrox	96.622	148	5	0	1	148	31768	31621	2.43e-63	245
PLA2_vPER_Core:Consensus/1-148	KX211994.1	Crotalus atrox	90.667	150	7	3	1	148	37271	37415	2.6e-50	201
PLA2_vPER_Core:Consensus/1-148	KX211994.1	Crotalus atrox	89.865	148	15	0	1	148	21928	22075	9.06e-50	200
PLA2_vPER_Core:Consensus/1-148	KX211994.1	Crotalus atrox	88.514	148	17	0	1	148	41517	41370	4.69e-47	191
PLA2_vPER_Core:Consensus/1-148	AB440236.1	Protobothrops flavoviridis	91.781	146	12	0	3	148	11982	11837	5.01e-53	210
PLA2_vPER_Core:Consensus/1-148	AB440236.1	Protobothrops flavoviridis	90.541	148	14	0	1	148	17275	17128	2.13e-51	205
PLA2_vPER_Core:Consensus/1-148	AB440236.1	Protobothrops flavoviridis	89.726	146	15	0	3	148	24802	24657	1.1e-48	196
PLA2_vPER_Core:Consensus/1-148	KM488542.1	Ovophis okinavensis	91.216	148	13	0	1	148	7219	7072	1.75e-52	209
PLA2_vPER_Core:Consensus/1-148	KX211993.1	Crotalus scutulatus scutulatus	90.541	148	14	0	1	148	46841	46988	2.13e-51	205
PLA2_vPER_Core:Consensus/1-148	KX211993.1	Crotalus scutulatus scutulatus	89.865	148	15	0	1	148	59065	59212	9.06e-50	200
PLA2_vPER_Core:Consensus/1-148	KX211993.1	Crotalus scutulatus scutulatus	89.189	148	16	0	1	148	63134	62987	1.1e-48	196
PLA2_vPER_Core:Consensus/1-148	KX211993.1	Crotalus scutulatus scutulatus	87.162	148	19	0	1	148	74350	74203	2.43e-44	182
PLA2_vPER_Core:Consensus/1-148	KX211996.1	Crotalus adamanteus	90.541	148	14	0	1	148	14838	14985	2.13e-51	205
PLA2_vPER_Core:Consensus/1-148	KX211996.1	Crotalus adamanteus	90	150	8	3	1	148	24729	24873	1.1e-48	196
PLA2_vPER_Core:Consensus/1-148	KX211996.1	Crotalus adamanteus	87.162	148	16	1	1	148	28861	28717	8.49e-44	180
PLA2_vPER_Core:Consensus/1-148	XM_039367442.1	Crotalus tigris	90.541	148	14	0	1	148	1497	1644	2.13e-51	205
PLA2_vPER_Core:Consensus/1-148	AB588615.1	Protobothrops flavoviridis	90.541	148	14	0	1	148	1106	1253	2.13e-51	205
PLA2_vPER_Core:Consensus/1-148	AB588615.1	Protobothrops flavoviridis	90.411	146	14	0	3	148	5380	5235	2.6e-50	201
PLA2_vPER_Core:Consensus/1-148	KM488541.1	Protobothrops elegans	88.514	148	11	1	1	148	7304	7163	1.35e-47	192
PLA2_vPER_Core:Consensus/1-148	KM488540.1	Protobothrops tokarensis	87.162	148	13	1	1	148	9014	8873	6.97e-45	183
PLA2_vPER_Core:Consensus/1-148	KM488539.1	Protobothrops flavoviridis	87.162	148	13	1	1	148	3950	3809	6.97e-45	183
PLA2_vPER_Core:Consensus/1-148	KM488538.1	Protobothrops flavoviridis	87.162	148	13	1	1	148	9019	8878	6.97e-45	183
PLA2_vPER_Core:Consensus/1-148	XM_039367470.1	Crotalus tigris	86.42	81	11	0	1	81	11	91	7.96e-19	97.8
PLA2_vPER_Core:Consensus/1-148	XM_039367467.1	Crotalus tigris	86.42	81	11	0	1	81	48	128	7.96e-19	97.8
PLA2_vPER_Core:Consensus/1-148	XR_005558352.1	Crotalus tigris	83.784	74	11	1	5	78	233	305	7.45e-13	77
PLA2_vPER_Core:Consensus/1-148	MG132008.1	Bothrops moojeni	95.238	42	2	0	1	42	228	187	3.86e-10	68
PLA2_vPER_Core:Consensus/1-148	XM_015820366.1	Protobothrops mucrosquamatus	90.476	42	4	0	1	42	298	257	2e-07	59
PLA2_vPER_Core:Consensus/1-148	XM_039367457.1	Crotalus tigris	90.476	42	4	0	1	42	2378	2337	2e-07	59
PLA2_vPER_Core:Consensus/1-148	XM_039367456.1	Crotalus tigris	90.476	42	4	0	1	42	2893	2852	2e-07	59
PLA2_vPER_Core:Consensus/1-148	MN831293.1	Vipera anatolica senliki	90.244	41	4	0	2	42	189	149	6.98e-07	57.2
PLA2_vPER_Core:Consensus/1-148	MN831292.1	Vipera anatolica senliki	90.244	41	4	0	2	42	227	187	6.98e-07	57.2
PLA2_vPER_Core:Consensus/1-148	XM_034424287.1	Pantherophis guttatus	88.372	43	5	0	1	43	359	317	2.44e-06	56.3
PLA2_vPER_Core:Consensus/1-148	XM_014071370.1	Thamnophis sirtalis	88.372	43	5	0	1	43	456	414	2.44e-06	56.3
PLA2_vPER_Core:Consensus/1-148	XM_039367466.1	Crotalus tigris	88.095	42	5	0	1	42	490	449	8.5e-06	54.5
PLA2_vPER_Core:Consensus/1-148	XM_039367465.1	Crotalus tigris	88.095	42	5	0	1	42	722	681	8.5e-06	54.5
PLA2_vPER_Core:Consensus/1-148	XM_039367464.1	Crotalus tigris	88.095	42	5	0	1	42	722	681	8.5e-06	54.5
PLA2_vPER_Core:Consensus/1-148	MF948039.1	Boiga irregularis	85.714	42	6	0	2	43	227	186	0.000104	50
PLA2_vPER_Core:Consensus/1-148	XM_032232261.1	Thamnophis elegans	83.721	43	7	0	1	43	729	687	0.001	47.3
PLA2_vPER_Core:Consensus/1-148	XM_026720853.1	Pseudonaja textilis	81.395	43	8	0	1	43	461	419	0.015	42.8
PLA2_vPER_Core:Consensus/1-148	dbj|BFFQ01005568.1|	Protobothrops flavoviridis	90.411	146	14	0	3	148	3064	3209	1.21e-47	193
PLA2_vPER_Core:Consensus/1-148	dbj|BFFQ01005568.1|	Protobothrops flavoviridis	89.865	148	15	0	1	148	7353	7206	4.34e-47	191
PLA2_vPER_Core:Consensus/1-148	dbj|BFFQ01003251.1|	Protobothrops flavoviridis	87.838	148	12	2	1	148	337136	337277	2.03e-40	169
SVMP_vPER_Core:Consensus/1-413	MT032003.1	Crotalus scutulatus	96.368	413	14	1	1	413	389388	388977	0	674
SVMP_vPER_Core:Consensus/1-413	MT032003.1	Crotalus scutulatus	93.961	414	18	3	1	413	599347	598940	6.39e-178	627
SVMP_vPER_Core:Consensus/1-413	MT032003.1	Crotalus scutulatus	93.22	413	12	3	1	413	433177	432781	9.48e-176	620
SVMP_vPER_Core:Consensus/1-413	MT032003.1	Crotalus scutulatus	92.978	413	23	2	1	413	355425	355019	4.91e-173	611
SVMP_vPER_Core:Consensus/1-413	MT032003.1	Crotalus scutulatus	96.053	380	13	2	1	380	507845	507468	4.91e-173	611
SVMP_vPER_Core:Consensus/1-413	MT032003.1	Crotalus scutulatus	92.91	409	17	2	5	413	570377	569981	1.71e-172	609
SVMP_vPER_Core:Consensus/1-413	MT032003.1	Crotalus scutulatus	92.494	413	26	4	1	413	478690	478283	1.32e-167	592
SVMP_vPER_Core:Consensus/1-413	MT032003.1	Crotalus scutulatus	92.01	413	27	3	1	413	476297	475891	1.6e-166	589
SVMP_vPER_Core:Consensus/1-413	MT032003.1	Crotalus scutulatus	90.976	410	13	4	5	413	442569	442183	1.01e-162	577
SVMP_vPER_Core:Consensus/1-413	MT032003.1	Crotalus scutulatus	88.378	413	32	3	1	413	662993	662597	1.32e-148	530
SVMP_vPER_Core:Consensus/1-413	MT032003.1	Crotalus scutulatus	86.925	413	20	4	1	413	297067	296689	2.9e-144	515
SVMP_vPER_Core:Consensus/1-413	MT032003.1	Crotalus scutulatus	85.751	393	38	5	5	396	726156	725781	1.01e-124	451
SVMP_vPER_Core:Consensus/1-413	MT032003.1	Crotalus scutulatus	88.415	328	27	3	86	413	534309	533993	6e-115	417
SVMP_vPER_Core:Consensus/1-413	MT032003.1	Crotalus scutulatus	75.887	423	73	8	3	399	198953	198534	1.72e-77	294
SVMP_vPER_Core:Consensus/1-413	MT032003.1	Crotalus scutulatus	86.555	238	22	2	86	323	690274	690047	2.55e-75	286
SVMP_vPER_Core:Consensus/1-413	MT032003.1	Crotalus scutulatus	76.638	351	44	8	98	413	265268	264921	2.91e-68	262
SVMP_vPER_Core:Consensus/1-413	MT032003.1	Crotalus scutulatus	71.32	394	63	8	3	369	799465	799835	1.61e-52	211
SVMP_vPER_Core:Consensus/1-413	MT032003.1	Crotalus scutulatus	99	100	1	0	314	413	689607	689508	3.33e-42	177
SVMP_vPER_Core:Consensus/1-413	MT019621.1	Crotalus atrox	96.126	413	10	2	1	413	990026	989620	0	670
SVMP_vPER_Core:Consensus/1-413	MT019621.1	Crotalus atrox	95.884	413	16	1	1	413	212389	211978	0	665
SVMP_vPER_Core:Consensus/1-413	MT019621.1	Crotalus atrox	95.884	413	16	1	1	413	217529	217118	0	665
SVMP_vPER_Core:Consensus/1-413	MT019621.1	Crotalus atrox	95.884	413	16	1	1	413	305146	304735	0	665
SVMP_vPER_Core:Consensus/1-413	MT019621.1	Crotalus atrox	94.673	413	18	3	1	413	379477	379069	1.23e-180	636
SVMP_vPER_Core:Consensus/1-413	MT019621.1	Crotalus atrox	94.634	410	14	3	1	410	369179	368778	4.3e-180	635
SVMP_vPER_Core:Consensus/1-413	MT019621.1	Crotalus atrox	94.175	412	16	3	1	412	648852	648449	1.83e-178	629
SVMP_vPER_Core:Consensus/1-413	MT019621.1	Crotalus atrox	93.961	414	17	3	1	413	781114	780708	1.83e-178	628
SVMP_vPER_Core:Consensus/1-413	MT019621.1	Crotalus atrox	93.947	413	17	3	1	413	405367	404963	6.39e-178	627
SVMP_vPER_Core:Consensus/1-413	MT019621.1	Crotalus atrox	93.399	409	15	2	5	413	752231	751835	3.31e-175	618
SVMP_vPER_Core:Consensus/1-413	MT019621.1	Crotalus atrox	92.978	413	23	2	1	413	271593	271187	4.91e-173	611
SVMP_vPER_Core:Consensus/1-413	MT019621.1	Crotalus atrox	96.053	380	13	2	1	380	482009	481632	4.91e-173	611
SVMP_vPER_Core:Consensus/1-413	MT019621.1	Crotalus atrox	95.55	382	13	3	1	380	582084	581705	7.29e-171	603
SVMP_vPER_Core:Consensus/1-413	MT019621.1	Crotalus atrox	91.932	409	10	3	5	413	414521	414136	1.08e-168	597
SVMP_vPER_Core:Consensus/1-413	MT019621.1	Crotalus atrox	92.252	413	29	3	1	413	550167	549758	4.6e-167	590
SVMP_vPER_Core:Consensus/1-413	MT019621.1	Crotalus atrox	91.707	410	10	4	5	413	658021	657635	4.6e-167	590
SVMP_vPER_Core:Consensus/1-413	MT019621.1	Crotalus atrox	92.01	413	27	3	1	413	448133	447727	1.6e-166	589
SVMP_vPER_Core:Consensus/1-413	MT019621.1	Crotalus atrox	92.01	413	26	4	1	413	450522	450117	1.95e-165	585
SVMP_vPER_Core:Consensus/1-413	MT019621.1	Crotalus atrox	90.709	409	15	3	5	413	673049	672664	3.53e-162	574
SVMP_vPER_Core:Consensus/1-413	MT019621.1	Crotalus atrox	89.346	413	27	4	1	413	719653	719258	5.99e-153	545
SVMP_vPER_Core:Consensus/1-413	MT019621.1	Crotalus atrox	88.862	413	30	3	1	413	847445	847049	2.55e-151	539
SVMP_vPER_Core:Consensus/1-413	MT019621.1	Crotalus atrox	86.925	413	20	4	1	413	142504	142126	2.9e-144	515
SVMP_vPER_Core:Consensus/1-413	MT019621.1	Crotalus atrox	86.308	409	39	4	5	413	1111644	1111253	1.72e-134	483
SVMP_vPER_Core:Consensus/1-413	MT019621.1	Crotalus atrox	86.064	409	40	4	5	413	1058133	1057742	2.09e-133	479
SVMP_vPER_Core:Consensus/1-413	MT019621.1	Crotalus atrox	88.268	358	34	2	2	359	170991	170642	2.39e-126	455
SVMP_vPER_Core:Consensus/1-413	MT019621.1	Crotalus atrox	85.969	392	37	5	5	396	916133	915760	8.33e-126	453
SVMP_vPER_Core:Consensus/1-413	MT019621.1	Crotalus atrox	85.751	393	38	5	5	396	952015	951640	1.01e-124	451
SVMP_vPER_Core:Consensus/1-413	MT019621.1	Crotalus atrox	88.72	328	26	3	86	413	514053	513737	4.92e-116	422
SVMP_vPER_Core:Consensus/1-413	MT019621.1	Crotalus atrox	87.5	328	29	4	86	413	611731	611416	1.61e-109	400
SVMP_vPER_Core:Consensus/1-413	MT019621.1	Crotalus atrox	97.403	231	6	0	183	413	338998	338768	8.33e-107	390
SVMP_vPER_Core:Consensus/1-413	MT019621.1	Crotalus atrox	96.97	231	6	1	183	413	244484	244255	4.32e-104	382
SVMP_vPER_Core:Consensus/1-413	MT019621.1	Crotalus atrox	86.555	238	22	2	86	323	874701	874474	2.55e-75	286
SVMP_vPER_Core:Consensus/1-413	MT019621.1	Crotalus atrox	75	424	76	8	3	399	43338	42918	3.79e-73	279
SVMP_vPER_Core:Consensus/1-413	MT019621.1	Crotalus atrox	76.923	351	42	9	98	413	109694	109348	2.91e-68	263
SVMP_vPER_Core:Consensus/1-413	MT019621.1	Crotalus atrox	71.32	394	63	8	3	369	1186911	1187281	1.61e-52	211
SVMP_vPER_Core:Consensus/1-413	MT019621.1	Crotalus atrox	99	100	1	0	314	413	874034	873935	3.33e-42	177
SVMP_vPER_Core:Consensus/1-413	MT124581.1	Crotalus horridus	95.411	414	17	2	1	413	42503	42091	0	655
SVMP_vPER_Core:Consensus/1-413	MT124581.1	Crotalus horridus	92.252	413	26	2	1	413	88271	87865	3.1e-169	598
SVMP_vPER_Core:Consensus/1-413	MT124581.1	Crotalus horridus	91.041	413	28	3	1	413	6950	6547	1.23e-161	573
SVMP_vPER_Core:Consensus/1-413	MT124581.1	Crotalus horridus	88.998	409	34	3	5	413	120413	120016	3.78e-149	532
SVMP_vPER_Core:Consensus/1-413	MT124581.1	Crotalus horridus	86.735	392	35	4	5	396	151636	151262	1.08e-130	471
SVMP_vPER_Core:Consensus/1-413	MT124581.1	Crotalus horridus	88.957	326	26	2	86	411	116438	116123	1.16e-117	426
SVMP_vPER_Core:Consensus/1-413	MT127551.1	Crotalus horridus	95.411	414	17	2	1	413	131803	131391	0	655
SVMP_vPER_Core:Consensus/1-413	MT127551.1	Crotalus horridus	97.105	380	9	2	1	380	4447	4070	1.83e-178	629
SVMP_vPER_Core:Consensus/1-413	MT127551.1	Crotalus horridus	97.105	380	9	2	1	380	64652	64275	1.83e-178	629
SVMP_vPER_Core:Consensus/1-413	MT127551.1	Crotalus horridus	93.22	413	25	3	1	413	34885	34476	1.71e-172	609
SVMP_vPER_Core:Consensus/1-413	MT127551.1	Crotalus horridus	92.736	413	24	2	1	413	173704	173298	5.98e-172	607
SVMP_vPER_Core:Consensus/1-413	MT127551.1	Crotalus horridus	91.041	413	29	2	1	413	96283	95879	1.01e-162	577
SVMP_vPER_Core:Consensus/1-413	MT127551.1	Crotalus horridus	89.242	409	33	3	5	413	205619	205222	8.88e-151	536
SVMP_vPER_Core:Consensus/1-413	MT127551.1	Crotalus horridus	86.735	392	35	4	5	396	236831	236457	1.08e-130	471
SVMP_vPER_Core:Consensus/1-413	MT127551.1	Crotalus horridus	89.634	328	24	2	86	413	89036	88719	1.83e-121	439
SVMP_vPER_Core:Consensus/1-413	MT127551.1	Crotalus horridus	89.264	326	25	2	86	411	201865	201550	9.5e-119	431
SVMP_vPER_Core:Consensus/1-413	MT127551.1	Crotalus horridus	71.066	394	64	8	3	369	325200	325570	1.97e-51	206
SVMP_vPER_Core:Consensus/1-413	MT124580.1	Crotalus horridus	94.915	413	13	3	1	413	173937	173533	0	645
SVMP_vPER_Core:Consensus/1-413	MT124580.1	Crotalus horridus	97.105	380	9	2	1	380	248518	248141	1.83e-178	629
SVMP_vPER_Core:Consensus/1-413	MT124580.1	Crotalus horridus	93.947	413	18	3	1	413	213661	213256	2.23e-177	626
SVMP_vPER_Core:Consensus/1-413	MT124580.1	Crotalus horridus	92.736	413	27	3	1	413	216064	215655	8.88e-170	600
SVMP_vPER_Core:Consensus/1-413	MT124580.1	Crotalus horridus	91.041	413	29	2	1	413	279997	279593	1.01e-162	577
SVMP_vPER_Core:Consensus/1-413	MT124580.1	Crotalus horridus	97.059	340	9	1	74	413	183267	182929	1.83e-159	565
SVMP_vPER_Core:Consensus/1-413	MT124580.1	Crotalus horridus	86.441	413	22	4	1	413	108774	108396	1.5e-141	506
SVMP_vPER_Core:Consensus/1-413	MT124580.1	Crotalus horridus	89.634	328	24	2	86	413	272959	272642	1.83e-121	439
SVMP_vPER_Core:Consensus/1-413	MT124580.1	Crotalus horridus	87.984	258	8	3	5	262	183502	183268	1.96e-89	334
SVMP_vPER_Core:Consensus/1-413	MT124580.1	Crotalus horridus	75.414	423	75	7	3	399	10172	9753	2.1e-76	289
SVMP_vPER_Core:Consensus/1-413	MT124580.1	Crotalus horridus	76.638	351	44	8	98	413	76645	76298	2.91e-68	262
SVMP_vPER_Core:Consensus/1-413	MT127550.1	Crotalus horridus	94.673	413	14	3	1	413	75766	75362	0	640
SVMP_vPER_Core:Consensus/1-413	MT127550.1	Crotalus horridus	93.947	413	18	3	1	413	115410	115005	2.23e-177	626
SVMP_vPER_Core:Consensus/1-413	MT127550.1	Crotalus horridus	92.736	413	27	3	1	413	117811	117402	8.88e-170	600
SVMP_vPER_Core:Consensus/1-413	MT127550.1	Crotalus horridus	97.059	340	9	1	74	413	85063	84725	1.83e-159	565
SVMP_vPER_Core:Consensus/1-413	MT127550.1	Crotalus horridus	86.441	413	22	4	1	413	10677	10299	1.5e-141	506
SVMP_vPER_Core:Consensus/1-413	MT127550.1	Crotalus horridus	87.984	258	8	3	5	262	85298	85064	1.96e-89	334
SVMP_vPER_Core:Consensus/1-413	MT070611.1	Crotalus durissus terrificus	94.673	413	18	3	1	413	182920	182512	1.23e-180	636
SVMP_vPER_Core:Consensus/1-413	MT070611.1	Crotalus durissus terrificus	94.431	413	15	3	1	413	172635	172231	1.23e-180	636
SVMP_vPER_Core:Consensus/1-413	MT070611.1	Crotalus durissus terrificus	94.431	413	15	3	1	413	220767	220363	1.23e-180	636
SVMP_vPER_Core:Consensus/1-413	MT070611.1	Crotalus durissus terrificus	91.932	409	10	3	5	413	231255	230870	1.08e-168	597
SVMP_vPER_Core:Consensus/1-413	MT070611.1	Crotalus durissus terrificus	86.199	413	23	4	1	413	110598	110220	6.4e-140	501
SVMP_vPER_Core:Consensus/1-413	MT070611.1	Crotalus durissus terrificus	88.301	359	33	3	2	359	139527	139177	8.33e-126	453
SVMP_vPER_Core:Consensus/1-413	MT070611.1	Crotalus durissus terrificus	75.177	423	76	7	3	399	11380	10961	8.91e-75	285
SVMP_vPER_Core:Consensus/1-413	MT070611.1	Crotalus durissus terrificus	76.638	351	43	9	98	413	78800	78454	3.55e-67	259
SVMP_vPER_Core:Consensus/1-413	MT070612.1	Crotalus durissus terrificus	95.778	379	14	2	2	380	42530	42154	2.09e-171	605
SVMP_vPER_Core:Consensus/1-413	MT070612.1	Crotalus durissus terrificus	89.329	328	24	3	86	413	3888	3572	9.5e-119	431
SVMP_vPER_Core:Consensus/1-413	MT070612.1	Crotalus durissus terrificus	89.329	328	24	3	86	413	68042	67726	9.5e-119	431
SVMP_vPER_Core:Consensus/1-413	MT070612.1	Crotalus durissus terrificus	70.812	394	67	7	3	369	178738	179110	6.86e-51	205
SVMP_vPER_Core:Consensus/1-413	MT070613.1	Crotalus scutulatus	88.827	358	32	2	2	359	69990	69641	4.61e-129	464
SVMP_vPER_Core:Consensus/1-413	MT070613.1	Crotalus scutulatus	86.005	393	37	5	5	396	135282	134907	2.39e-126	455
SVMP_vPER_Core:Consensus/1-413	MT070613.1	Crotalus scutulatus	88.72	328	23	3	86	413	95912	95599	4.04e-117	425
SVMP_vPER_Core:Consensus/1-413	MT070613.1	Crotalus scutulatus	80.63	413	21	5	1	413	35322	34969	2.09e-114	416
SVMP_vPER_Core:Consensus/1-413	MT070613.1	Crotalus scutulatus	71.066	394	64	8	3	369	209286	209656	1.97e-51	206
SVMP_vPER_Core:Consensus/1-413	MT124582.1	Crotalus horridus	70.812	394	65	8	3	369	80410	80780	8.36e-50	202
SVMP_vPER_Core:Consensus/1-413	XR_004256049.1	Thamnophis elegans	80.851	47	6	1	50	93	149	195	0.049	43.7
SVMP_vPER_Core:Consensus/1-413	scaffold2684	Deinagkistrodon acutus	95.631	412	14	4	2	413	863	456	0	658
SVMP_vPER_Core:Consensus/1-413	scaffold3006	Deinagkistrodon acutus	94.444	414	21	2	1	413	4827	5239	1.57e-180	636
SVMP_vPER_Core:Consensus/1-413	scaffold2076	Deinagkistrodon acutus	94.431	413	19	2	1	413	28846	29254	2.03e-179	632
SVMP_vPER_Core:Consensus/1-413	scaffold242	Deinagkistrodon acutus	89.588	413	27	8	2	413	77608	78005	9.94e-143	510
SVMP_vPER_Core:Consensus/1-413	scaffold242	Deinagkistrodon acutus	86.199	413	23	8	1	413	108568	108946	2.23e-114	416
SVMP_vPER_Core:Consensus/1-413	scaffold242	Deinagkistrodon acutus	85.167	209	20	3	216	413	142966	143174	1.89e-50	204
SVMP_vPER_Core:Consensus/1-413	scaffold549	Deinagkistrodon acutus	88.293	410	35	9	6	413	3500	3102	2.8e-133	479
SVMP_vPER_Core:Consensus/1-413	Scaffold6456	Deinagkistrodon acutus	95.102	245	11	1	169	413	1	244	6.28e-105	385
SVMP_vPER_Core:Consensus/1-413	C19313315	Deinagkistrodon acutus	93.678	174	10	1	216	389	3	175	3.97e-67	259
SVMP_vPER_Core:Consensus/1-413	C19919401	Deinagkistrodon acutus	82.838	303	18	8	38	340	1	269	1.44e-61	241
SVMP_vPER_Core:Consensus/1-413	C18927637	Deinagkistrodon acutus	91.333	150	13	0	175	324	1	150	5.25e-51	206
SVMP_vPER_Core:Consensus/1-413	C18666223	Deinagkistrodon acutus	92.8	125	8	1	1	125	124	1	3.18e-43	180
SVMP_vPER_Core:Consensus/1-413	C17853149	Deinagkistrodon acutus	96.226	106	4	0	227	332	1	106	1.48e-41	174
SVMP_vPER_Core:Consensus/1-413	C18150956	Deinagkistrodon acutus	93.277	119	4	2	206	324	115	1	5.33e-41	172
SVMP_vPER_Core:Consensus/1-413	C18102702	Deinagkistrodon acutus	90.909	121	4	2	38	158	114	1	5.36e-36	156
SVMP_vPER_Core:Consensus/1-413	C19356314	Deinagkistrodon acutus	94.048	84	3	2	1	83	83	1	4.21e-27	126
SVMP_vPER_Core:Consensus/1-413	W_scaffold10428	Deinagkistrodon acutus	93.421	76	4	1	38	113	647	721	1.18e-22	111
SVMP_vPER_Core:Consensus/1-413	C19238889	Deinagkistrodon acutus	96.923	65	2	0	349	413	1	65	4.24e-22	110
SVMP_vPER_Core:Consensus/1-413	scaffold569	Deinagkistrodon acutus	92.537	67	5	0	212	278	843375	843441	3.3e-18	97.1
SVMP_vPER_Core:Consensus/1-413	dbj|BFFQ01007560.1|	Protobothrops flavoviridis	94.915	413	20	1	1	413	9945	9534	0	645
SVMP_vPER_Core:Consensus/1-413	dbj|BFFQ01007560.1|	Protobothrops flavoviridis	93.947	413	24	1	1	413	28117	27706	1.15e-176	623
SVMP_vPER_Core:Consensus/1-413	dbj|BFFQ01007560.1|	Protobothrops flavoviridis	93.932	412	23	2	1	412	39723	39314	4.13e-176	621
SVMP_vPER_Core:Consensus/1-413	dbj|BFFQ01007560.1|	Protobothrops flavoviridis	93.233	266	15	3	148	413	64476	64214	4.56e-106	388
SVMP_vPER_Core:Consensus/1-413	dbj|BFFQ01083757.1|	Protobothrops flavoviridis	93.557	388	16	2	1	388	608	230	1.52e-160	569
SVMP_vPER_Core:Consensus/1-413	dbj|BFFQ01002098.1|	Protobothrops flavoviridis	90.709	409	31	4	5	413	187164	186763	4.28e-151	538
SVMP_vPER_Core:Consensus/1-413	dbj|BFFQ01002098.1|	Protobothrops flavoviridis	84.783	414	28	11	1	413	135590	135211	2.12e-104	383
SVMP_vPER_Core:Consensus/1-413	dbj|BFFQ01083635.1|	Protobothrops flavoviridis	90.073	413	16	4	1	413	658	1045	2.6e-143	512
SVMP_vPER_Core:Consensus/1-413	dbj|BFFQ01002364.1|	Protobothrops flavoviridis	88.889	414	33	8	1	413	63813	63412	7.27e-139	497
SVMP_vPER_Core:Consensus/1-413	dbj|BFFQ01002364.1|	Protobothrops flavoviridis	88.308	325	28	5	89	413	19524	19210	7.64e-104	381
SVMP_vPER_Core:Consensus/1-413	dbj|BFFQ01050489.1|	Protobothrops flavoviridis	100	46	0	0	345	390	11	56	6.71e-15	86.1
SVMP_vPER_Core:Consensus/1-413	gb|CM019156.1|	Naja naja	79.433	423	49	14	1	413	8324395	8324001	1e-68	265
SVMP_vPER_Core:Consensus/1-413	gb|CM019156.1|	Naja naja	78.91	422	52	14	1	413	8506019	8505626	7.81e-65	252
SVMP_vPER_Core:Consensus/1-413	gb|CM019156.1|	Naja naja	78.673	422	53	12	1	413	8435004	8434611	3.63e-63	246
SVMP_vPER_Core:Consensus/1-413	gb|CM019156.1|	Naja naja	84.211	190	20	8	1	181	8163348	8163536	4.84e-42	176
SVMP_vPER_Core:Consensus/1-413	gb|CM019156.1|	Naja naja	83.673	196	22	8	1	187	8204021	8203827	4.84e-42	176
SVMP_vPER_Core:Consensus/1-413	gb|CM019156.1|	Naja naja	79.57	186	28	6	216	400	8650479	8650655	1.78e-26	124
SVMP_vPER_Core:Consensus/1-413	ref|NW_013660811.1|	Thamnophis sirtalis	87.958	191	22	1	211	400	1769	1579	1.38e-56	224
SVMP_vPER_Core:Consensus/1-413	ref|NW_013657901.1|	Thamnophis sirtalis	86.239	109	12	3	226	333	921216	921110	2.4e-24	117
