# Supplementary figures and images for: Snake venom gene expression is coordinated by novel regulatory architecture and the integration of multiple co-opted vertebrate pathways
Source: HighWire-hosted journal article supplement (doi:10.1101/gr.276251.121), 2022-06-01

Source

RegPeaks

Other\_focal\_SVSP

All\_copies

0.05

0.10

pi

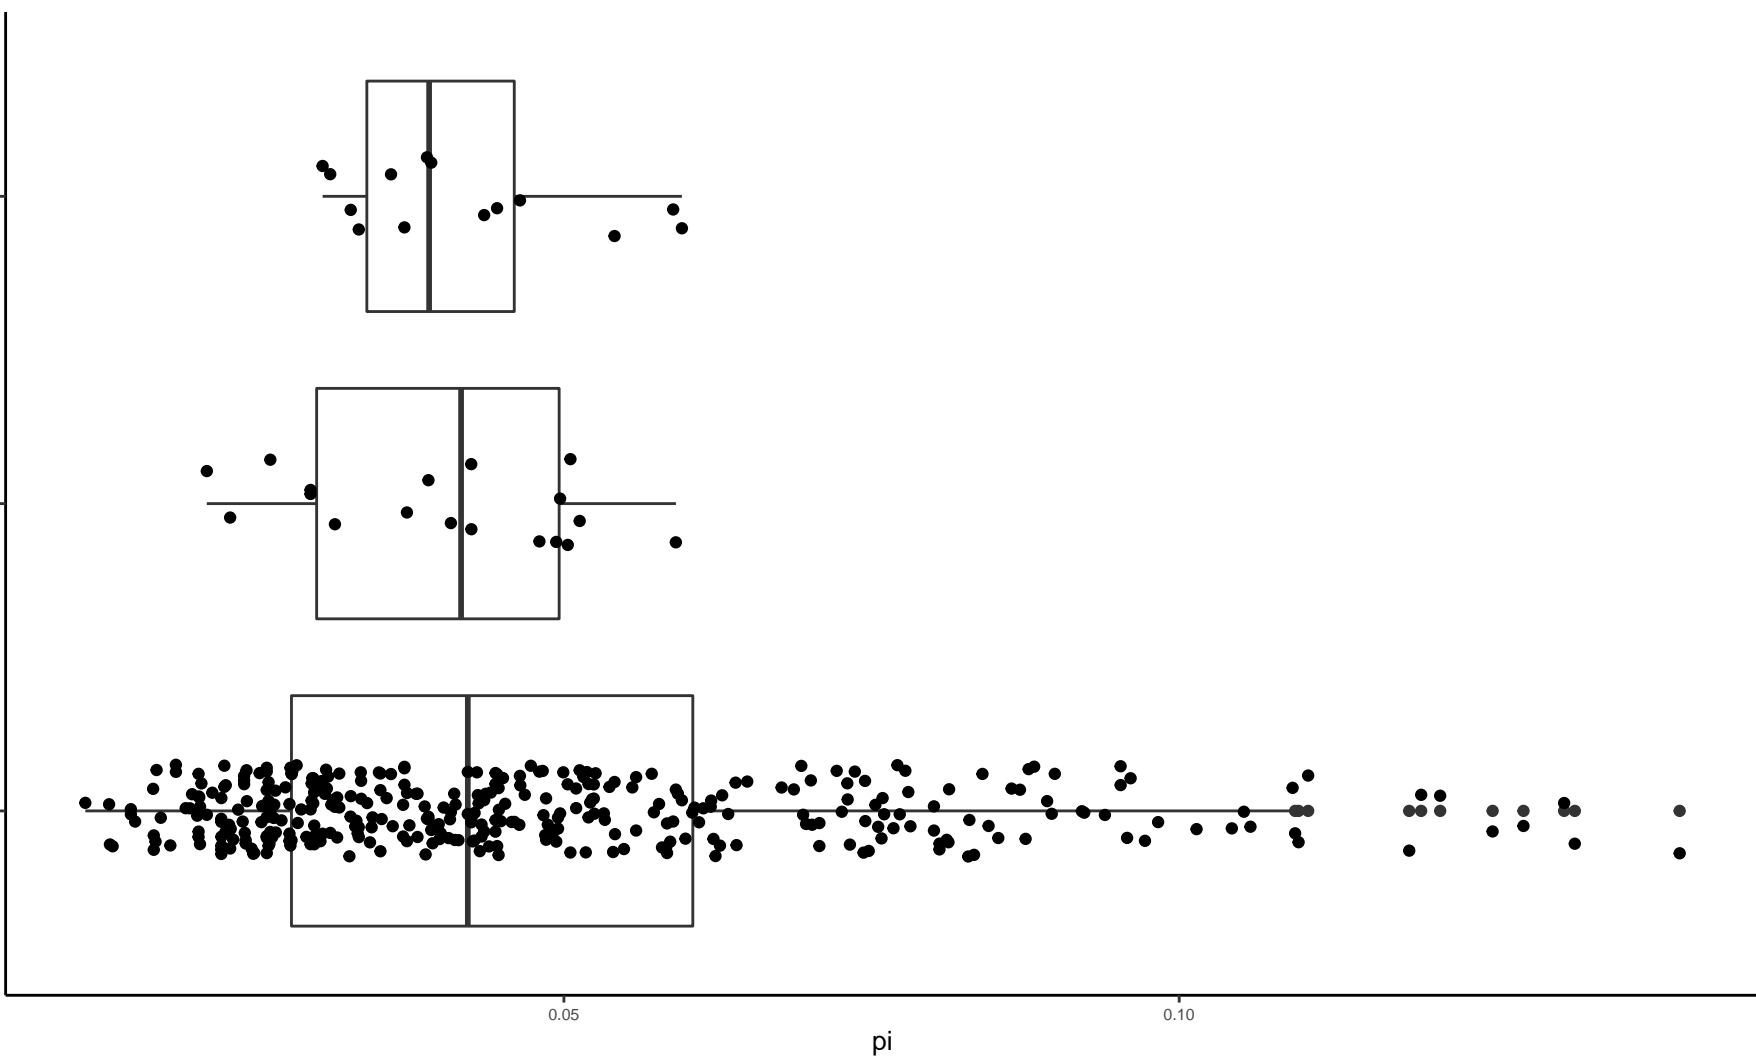

Supplement: Supplemental_Code.zip [file PI_frequency_distrubution.pdf › venomRegulation_2021-master/analysis/11_TEs/Pairwise_PI_results/PI_frequency_distrubution.pdf]

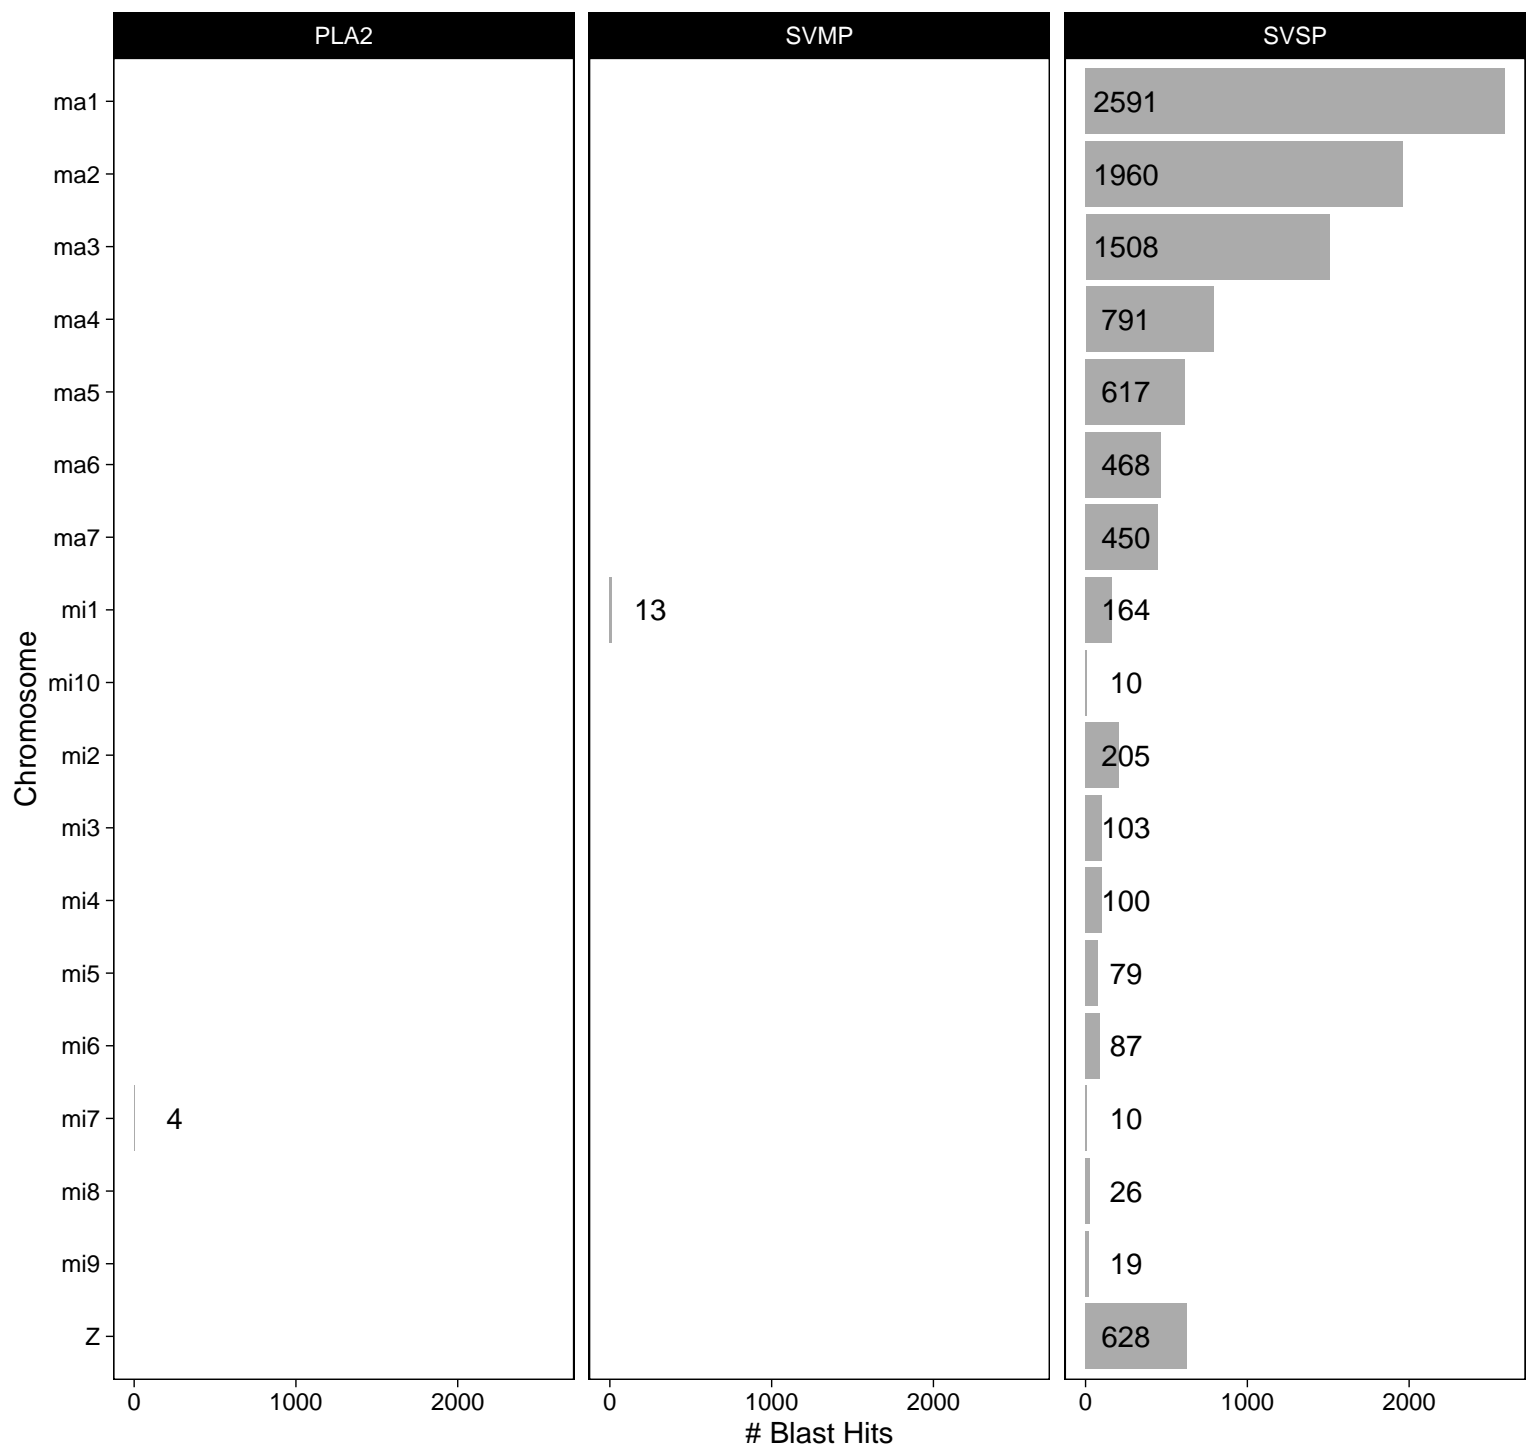

Supplement: Supplemental_Code.zip [file vPERBlastHitTally_forSupp_08.30.21.pdf › venomRegulation_2021-master/analysis/8_NVP_Analyses/enhancers/vPERBlastHitTally_forSupp_08.30.21.pdf]
